# Supplementary material for: Considering justice as a planning principle helps navigate a diversity of future energy infrastructure designs
Source: Research Square preprint supplement (doi:10.21203/rs.3.rs-4256136/v1), 2024-12-18

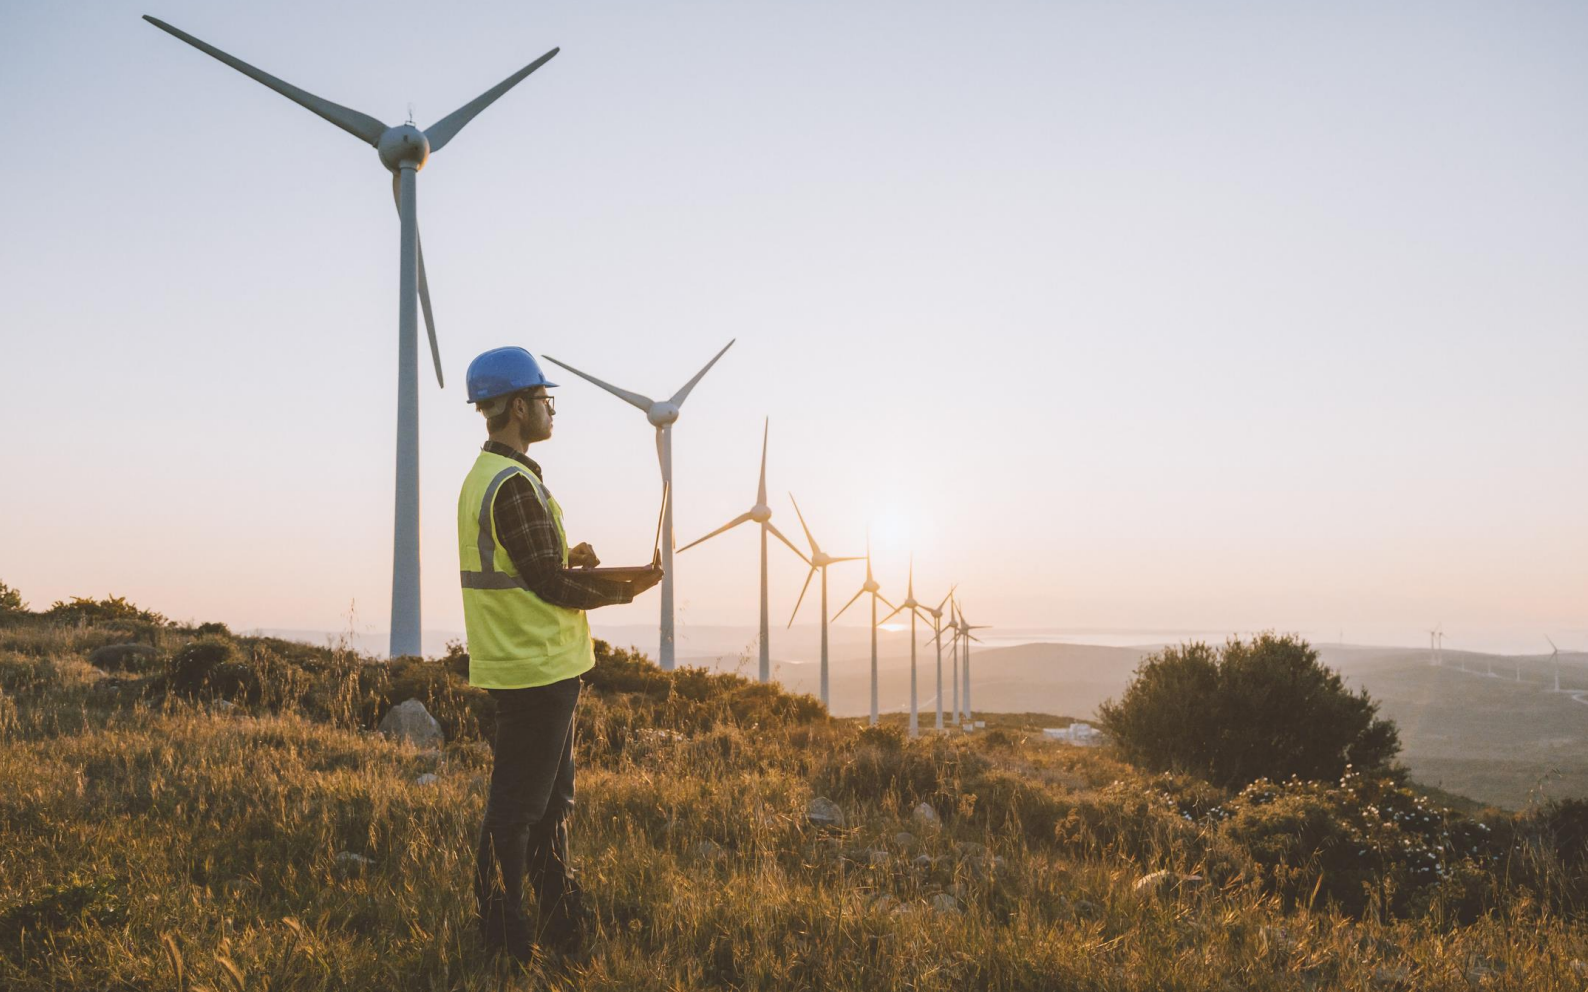

Special Eurobarometer 527  
Report

# Fairness perceptions of the green transition

Fieldwork: May-June 2022

Survey conducted by Kantar on behalf of Kantar Belgium at the request of the European Commission,  
Directorate-General for Employment, Social Affairs and Inclusion (DG EMPL)

Survey coordinated by the European Commission,  
Directorate-General for Communication (DG COMM “Media monitoring and Eurobarometer” Unit)

|                         |                                              |
|-------------------------|----------------------------------------------|
| <b>Project title</b>    | Special Eurobarometer 527                    |
|                         | Fairness perceptions of the green transition |
|                         | Report                                       |
| <b>Language version</b> | EN                                           |
| <b>Catalogue number</b> | KE-05-22-274-EN-N                            |
| <b>ISBN</b>             | 978-92-76-56527-7                            |
|                         | 10.2767/651172                               |

© European Union, 2022

<https://www.europa.eu/eurobarometer>

Photo credit: Getty Images

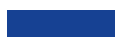

## TABLE OF CONTENTS

---

|                                                                                              |            |
|----------------------------------------------------------------------------------------------|------------|
| <b>INTRODUCTION</b>                                                                          | <b>4</b>   |
| <b>EXECUTIVE SUMMARY</b>                                                                     | <b>7</b>   |
| <b>I. A FAIR GREEN TRANSITION IS ESSENTIAL AND ASSOCIATED WITH OPPORTUNITIES</b>             | <b>10</b>  |
| 1. The need for a fair green transition                                                      | 11         |
| 2. Job opportunities and skills in the green transition                                      | 22         |
| 3. A shared responsibility to tackle climate change                                          | 33         |
| <b>II. REDUCING ENERGY USE IN A FAIR WAY</b>                                                 | <b>46</b>  |
| <b>III. FOCUS ON SPECIFIC DIMENSIONS ENABLING CITIZENS TO THRIVE IN THE GREEN TRANSITION</b> | <b>74</b>  |
| 1. Energy-efficient housing                                                                  | 75         |
| 2. Sustainable mobility                                                                      | 84         |
| 3. Access to green spaces                                                                    | 100        |
| <b>IV. SUPPORT FOR POLICY ACTIONS TO ADVANCE A FAIR GREEN TRANSITION</b>                     | <b>106</b> |
| <b>CONCLUSION</b>                                                                            | <b>115</b> |
| <b>TECHNICAL SPECIFICATIONS</b>                                                              | <b>TS1</b> |

# INTRODUCTION

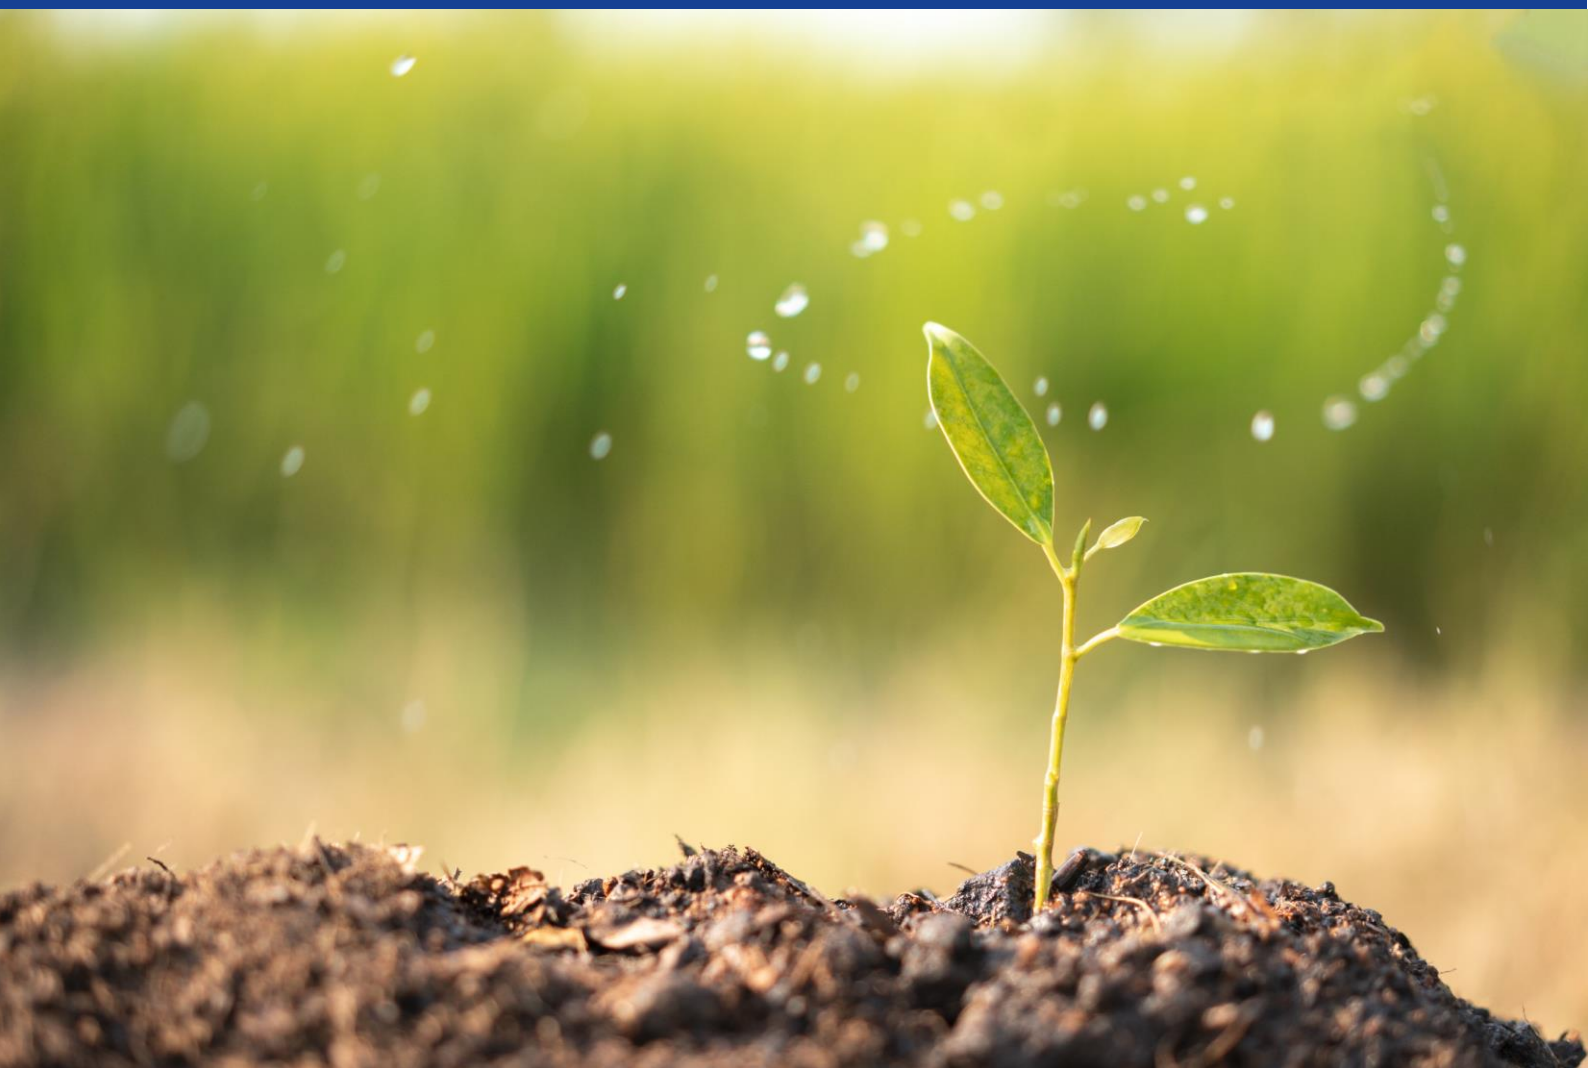



## Special Eurobarometer 527

### Fairness perceptions of the green transition

The European Green Deal<sup>1</sup>, launched in 2019, sets out the EU strategy to become the first climate-neutral continent by 2050 and transform the Union into a sustainable, fairer, and more prosperous society that respects the planetary boundaries. Fairness and solidarity are an integral part of the Green Deal, which underlines that no person and no place should be left behind in line with the European Pillar of Social Rights<sup>2</sup>. To encourage action, the European Climate Law, in force since July 2021, sets out a binding objective of climate neutrality in the Union by 2050 and a binding intermediate target of a net domestic reduction in greenhouse gas emissions of at least 55% compared to 1990 levels by 2030. Member States are also notably putting in place measures to achieve their climate targets through their national energy and climate plans (NECPs) for the period 2021-30.

Delivering the European Green Deal is a key priority of the European Commission. The Commission adopted a series of policy proposals to deliver on the European Green Deal, notably the so-called 'Fit for 55' package<sup>3</sup>. The package of legislative proposals will make the EU's climate, energy, land use, transport and taxation policies fit to deliver on the EU climate targets. Together with the pressing need to tackle climate change, with weather extremes becoming more common and intensive, the new geopolitical situation accompanied by high-energy prices and higher cost of living clearly strengthens the importance of a rapid green transition. On 18 May 2022, the European Commission presented REPowerEU<sup>4</sup>, the EU's plan to phase out its dependency on Russian fossil fuels through the accelerated roll-out of renewable energy, energy savings and the diversification of energy supplies. Employment, skills and social policies, for instance to tackle labour shortages in green sectors, and providing support to vulnerable households is even more important in such an accelerated scenario.

Overall, the green transition offers many great opportunities, and – with the right accompanying policies in place – a chance to 1) reduce emissions and improve the environment; 2) create quality jobs in the transition; and 3) improve welfare and well-being overall<sup>5</sup>. However, the green transition will not be inclusive by default, and accompanying policies are necessary to ensure a fair and just transition. Our policies need to ensure that nobody and no place is left behind and that the benefits and costs of this transformation are shared fairly across society. Ensuring a fair green transition is essential to safeguard social acceptance of climate change policies and public support for the reforms and investments needed to achieve the EU's climate and environmental objectives.

"Without immediate and deep emissions reductions across all sectors, limiting global warming to 1.5°C is beyond reach", scientists warn in the Intergovernmental Panel on Climate Change (IPCC) report of April 2022<sup>6</sup>. The report calls for urgent behavioural changes (sustainable mobility, energy efficient building ...), which can result in an estimated 40-70% reduction in global greenhouse gas emissions by 2050 and suggests that these changes can improve people's health and wellbeing. At the same time, there is

growing evidence that tackling climate change requires addressing the large inequalities in carbon emissions<sup>7</sup>.

EU Member States unanimously committed on 16 June 2022 to a joint policy framework – a Council Recommendation – for ensuring a fair transition towards climate neutrality<sup>8</sup>. Building on ongoing policy action, this Recommendation provides policy guidance to Member States on how to address the employment, skills and social aspects of the transition in a comprehensive and coherent manner. A broad range of EU funds can support a fair green transition, notably the Recovery and Resilience Facility (RRF), the Just Transition Mechanism, the European Social Fund Plus and the proposal for a Social Climate Fund.

The current survey was designed to assess EU citizens' attitudes towards and expectations around the green transition and the impact it will have on their lives. It covers notably the following areas:

- Perceptions of climate change and the fairness of the green transition;
- Views on the shared responsibility of citizens and various stakeholders in tackling climate change and enabling the green transition;
- Expectations of job opportunities and skills in the green transition;
- Perceptions of the current energy situation, energy consumption, including willingness to reduce energy use and motivations to do so;
- Energy efficient housing;
- Sustainable transport, including the quality, availability and affordability of public transport and measures that would encourage adopting more sustainable transport options;
- Access to and satisfaction with local green spaces;
- Support for various policies to support a fair green transition.

1 [https://ec.europa.eu/info/strategy/priorities-2019-2024/european-green-deal\\_en](https://ec.europa.eu/info/strategy/priorities-2019-2024/european-green-deal_en)  
2 [https://ec.europa.eu/info/strategy/priorities-2019-2024/economy-works-people-jobs-growth-and-investment/european-pillar-social-rights\\_en](https://ec.europa.eu/info/strategy/priorities-2019-2024/economy-works-people-jobs-growth-and-investment/european-pillar-social-rights_en)  
3 [https://ec.europa.eu/commission/presscorner/detail/en/IP\\_21\\_3541](https://ec.europa.eu/commission/presscorner/detail/en/IP_21_3541)  
4 [https://ec.europa.eu/commission/presscorner/detail/en/IP\\_22\\_3131](https://ec.europa.eu/commission/presscorner/detail/en/IP_22_3131)

5 <https://eur-lex.europa.eu/legal-content/EN/TXT/?uri=CELEX%3A52021SC0452&qid=1643714268435>  
6 [https://www.ipcc.ch/report/ar6/wg3/downloads/report/IPCC\\_AR6\\_WGIII\\_SPM.pdf](https://www.ipcc.ch/report/ar6/wg3/downloads/report/IPCC_AR6_WGIII_SPM.pdf)  
7 <https://wir2022.wid.world/chapter-6/>  
8 [https://ec.europa.eu/commission/presscorner/detail/en/QANDA\\_21\\_6823](https://ec.europa.eu/commission/presscorner/detail/en/QANDA_21_6823)

## Special Eurobarometer 527

### Fairness perceptions of the green transition

#### Methodology used for the survey

This report presents the full results of the Special Eurobarometer survey n° 527 (EB97.4) on fairness perceptions of the green transition, which was carried out between 30 May and 28 June 2022 in the 27 EU Member States. 26,395 EU citizens from different social and demographic categories were interviewed.

The methodology used is that of Eurobarometer surveys as carried out for the Directorate-General for Communication ("Media monitoring and Eurobarometer" Unit). However, in order to run fieldwork during the COVID pandemic, it was necessary to change the methodology in some countries (total or partial online interviews in some countries). A technical note on the methodology of the Eurobarometer surveys, as well as the way the interviews were conducted by the institutes within the Kantar network is annexed to this report. Also included are the interview methods and confidence intervals. In accordance with the EU General Data Protection Regulation<sup>9</sup> (GDPR), respondents were asked whether they would agree to be asked questions on issues that could be considered "sensitive".

Note: In this report, EU countries are referred to by their official abbreviations. The abbreviations used in this report are:

|                                                                            |      |                 |               |
|----------------------------------------------------------------------------|------|-----------------|---------------|
| Belgium                                                                    | BE   | Lithuania       | LT            |
| Bulgaria                                                                   | BG   | Luxembourg      | LU            |
| Czechia                                                                    | CZ   | Hungary         | HU            |
| Denmark                                                                    | DK   | Malta           | MT            |
| Germany                                                                    | DE   | The Netherlands | NL            |
| Estonia                                                                    | EE   | Austria         | AT            |
| Ireland                                                                    | IE   | Poland          | PL            |
| Greece                                                                     | EL   | Portugal        | PT            |
| Spain                                                                      | ES   | Romania         | RO            |
| France                                                                     | FR   | Slovenia        | SI            |
| Croatia                                                                    | HR   | Slovakia        | SK            |
| Italy                                                                      | IT   | Finland         | FI            |
| Republic of Cyprus                                                         | CY * | Sweden          | SE            |
| Latvia                                                                     | LV   |                 |               |
| European Union – weighted average for the 27 Member States                 |      |                 | EU27          |
| BE, FR, IT, LU, DE, AT, ES, PT, IE, NL, FI, EL, EE, SI, CY, MT, SK, LV, LT |      |                 | euro area     |
| BG, CZ, DK, HR, HU, PL, RO, SE                                             |      |                 | non-euro area |

\* Cyprus as a whole is one of the 27 European Union Member States. However, the *acquis communautaire* has been suspended in the part of the country not controlled by the government of the Republic of Cyprus. For practical reasons, only the interviews carried out in the part of the country controlled by the government of the Republic of Cyprus are included in the 'CY' category and in the EU27 average.

**We would like to thank the people across the European Union who have given up their time to take part in this survey.**

**Without their active participation, this study would not have been possible.**

<sup>9</sup> 2016/679



# EXECUTIVE SUMMARY

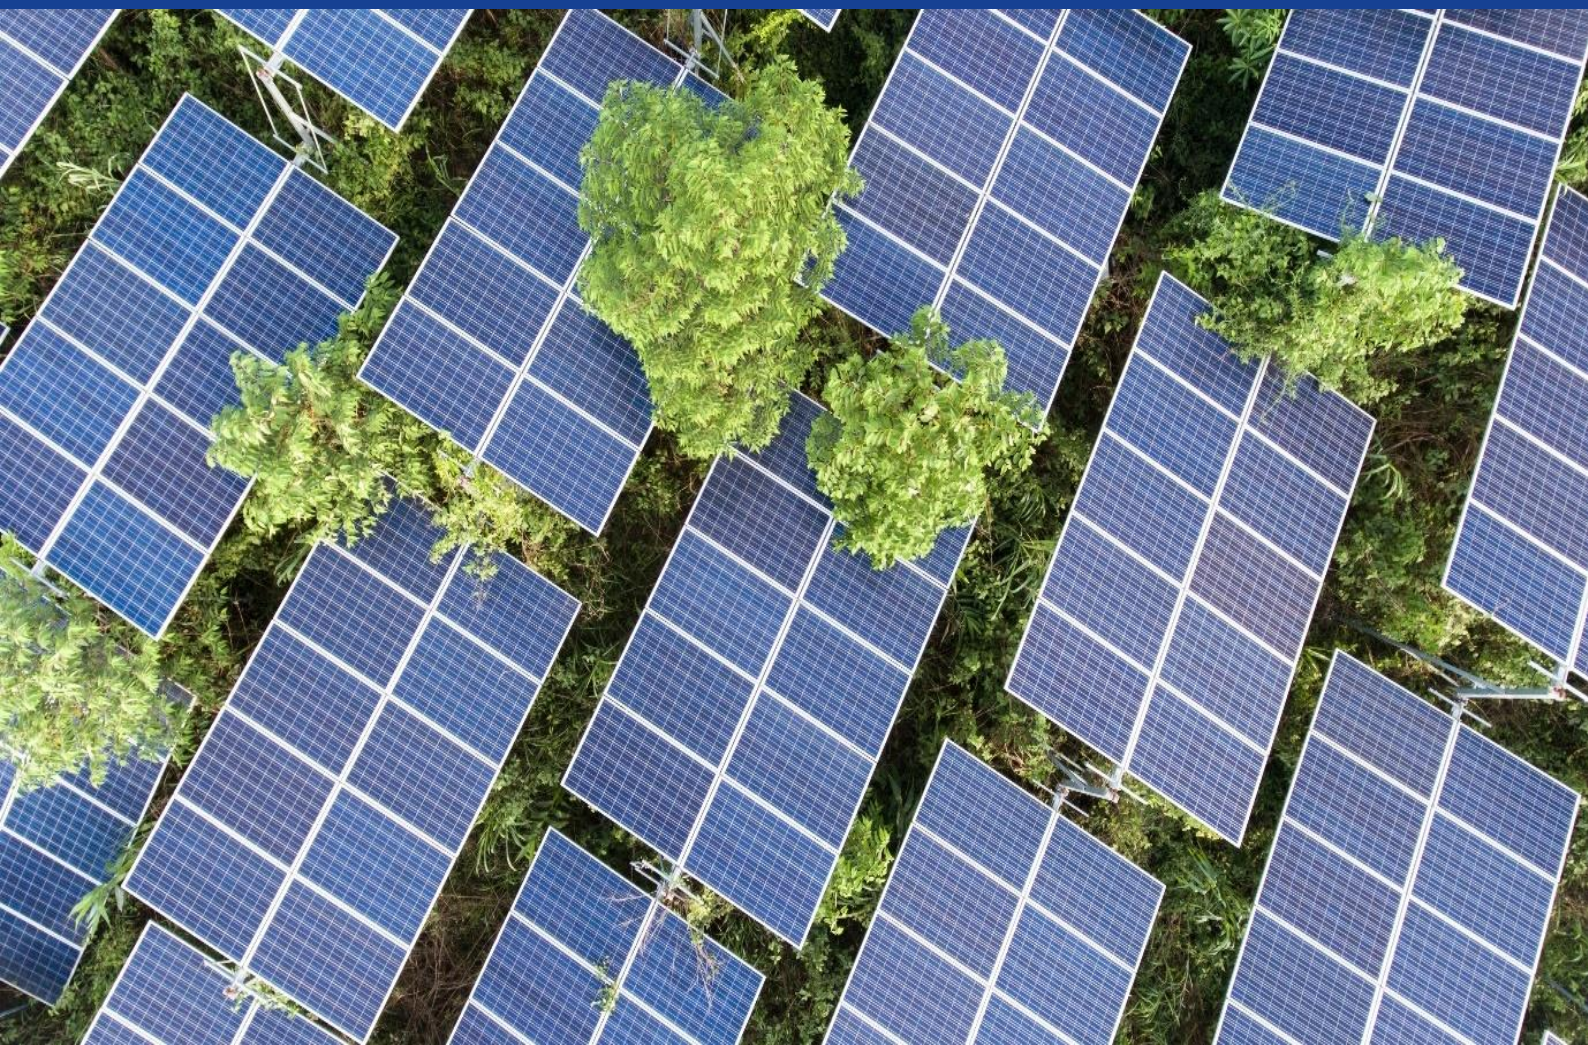



## Special Eurobarometer 527

### Fairness perceptions of the green transition

**A large majority of EU citizens responding to this Eurobarometer agree that the green transition should not leave anyone behind. Some Europeans, especially those with a lower disposable income, think that governments, local authorities and businesses are not doing enough to ensure this.**

- Almost nine in ten respondents (88%) agree that the green transition should not leave anyone behind.
- Less than half (46%) agree that by 2050, sustainable energy products and services will be affordable for everyone, including poorer people.
- Half (50%) agree that the EU is doing enough to ensure a fair green transition, and 50% say this about their regional, city or local public authorities. 47% think their national government is doing enough, while 43% say this about private companies and businesses.
- People with financial difficulties, or among the 1<sup>st</sup> quintile of the income distribution, are more likely to think that each level of government is not doing enough.

**Overall, there is optimism that policies that fight climate change will create more quality jobs, but those with a lower disposable income are less optimistic. A bit more than half feel they have skills to contribute to the green transition, while only one third feel that their job is contributing to the green transition.**

- Almost six in ten respondents (57%) agree that policies to fight climate change will create more new jobs than they will remove.
- Over six in ten (61%) agree that policies to tackle climate change will create quality jobs.
- More than half (54%) agree that their current skills allow them to contribute to the green transition.
- The higher disposable income respondents have, the more likely they are to feel that they have skills to contribute: 65% in the 5th quintile consider that their current skills allow them to contribute to the green transition, compared to 43% in the 1st quintile. This tendency is also reflected in the other statements on job opportunities.<sup>10</sup>
- More than half (55%) agree that being in a job that contributes to advancing the green transition is important to them personally.
- Yet, only one-third (34%) agree that their job contributes to advancing the green transition.

**The majority of Europeans are frightened by climate change and feel a personal responsibility to act.**

- Seven in ten respondents (70%) agree that climate change is something that frightens them, with women (74%) being more likely to be frightened than men (66%).
- More than three quarters (77%) of respondents feel a personal responsibility to act to limit climate change.
- Almost three-quarters (72%) of respondents think they should personally do more than they currently do to

contribute to the green transition and tackle climate change, regardless of what others do.

- Only a third of respondents (27%) think they do not need to take action personally to fight climate change if other people in their country take no action either. Similarly, few think their country does not need to take action to fight climate and environmental changes if other countries take no action either (25%).

**Current energy prices and transport costs are a serious problem for the vast majority of Europeans.**

- More than nine in ten (93%) respondents in the EU think the level of energy prices for people in their country is a serious problem. In fact, the majority (58%) thinks that it is a “very serious problem”.
- Eight in ten (79%) say the current cost of their household's energy needs is a problem. In addition, 4 out of 5 (80%) say the current cost of fuel for their transport needs is a problem.
- Respondents with the most disposable income (68%) are the least likely to say the current cost of their household energy needs are a serious problem, particularly compared to those with the least disposable income (84%).
- Respondents in Southern European countries and some Eastern European countries are more likely to say that the current cost of their household energy needs is a problem when compared to Northern and Western European countries. A similar pattern applies to the current cost of fuel for transport needs.

**About half of Europeans say they could use less energy and most are not ready to pay more for their energy. Respondents say that wealthier people should particularly make more efforts to reduce their energy consumption.**

- Over half (53%) are confident that they could use less energy than they do now.
- Respondents with fewer financial difficulties are more likely to be confident that they could use less energy.
- Four in ten (37%) are confident that a large number in their country is ready to limit their energy use to limit climate change.
- More than six in ten (62%) say that they would reduce their energy use mainly for economic reasons, while 36% would do so mainly for environmental reasons. Respondents with the most disposable income are the (47%) most likely to reduce energy use for environmental reasons. Respondents with the least disposable income are the (68%) most likely to reduce energy use for economic reasons.
- The majority (64%) of respondents are unwilling to pay higher energy prices to help speed up the green transition: 46% are unwilling because they cannot afford to pay more, while 18% are unwilling but could afford it.
- The majority of respondents (87%) think that wealthier people, in particular, should make more efforts to reduce their energy consumption.

<sup>10</sup> The higher the quintile, the more disposable income a respondent has.

## Special Eurobarometer 527

### Fairness perceptions of the green transition

- Most respondents rate their energy consumption as lower than that of other people in their country (70%). Only 28% acknowledge their consumption is high compared to other people in their country.

**More than a third of Europeans have already made energy efficiency improvements to their home in the last five years. Cost is the main barrier to improving home energy efficiency, especially for vulnerable categories.**

- Four in ten respondents (40%) believe their home needs an energy-efficient renovation.
- In the last five years, 35% of respondents have taken one or more measures to make their home more energy efficient (e.g. thermal insulation, changing doors and windows or the heating system).
- In the last five years, 10% of respondents have received public funds, subsidies or financial help to make their house more sustainable or energy efficient.
- Cost is the main barrier to improving home energy efficiency. 43% of respondents say that making their home more energy efficient is too expensive and they cannot afford it, while 21% mentioned that it is too expensive but that they could afford it.
- Unemployed respondents, those having difficulties paying bills, or single households with children are more likely to identify cost as a barrier to improving their home energy efficiency.
- Some respondents (16%) also report difficulties in finding qualified people to do the work or difficulties in finding the necessary materials and equipment on the market (15%).

**Almost half (48%) of Europeans are using sustainable mobility solutions as their main mode of transport, which is higher than in 2019.**

- On a typical day, the most common forms of transport are a car (47%), walking (21%), public transport (16%) and cycling or scooter (8%).
- The more disposable income a respondent has, the more likely they are to say that their main mode is a car, and the less likely they are to say it is walking. For example, 31% in the 1<sup>st</sup> income quintile mention walking, compared to 10% in the 5<sup>th</sup> quintile.
- Six in ten (60%) respondents rate the quality of public transport in their area as good, (55%) say availability is good, and 54% say that affordability is good. These figures are much lower in rural areas.
- More frequent public transport (36%), more affordable public transport (29%), faster public transport (23%), new or better designed public transport routes (21%) or more and safer bicycle lanes (20%) are the most mentioned features that would help respondents choose more sustainable modes of transport, especially in rural areas.

- Half (50%) of all respondents live five minutes or less away from a green space by walking, while 26% say they live between six and ten minutes away.
- The differences in access vary strongly based on the financial situation. For example, more than half (55%) of those who rarely or never have trouble paying bills live within a five-minute walk of green space, compared to around four in ten (42%) who have trouble paying bills at least some of the time.
- A large majority of respondents (85%) say that they are satisfied with the quality of the green space nearest to their home. In big cities, 83% of respondents are satisfied with the quality of the nearest green space compared to 93% of those living on a farm or in the countryside.

**There is widespread support for policies designed to make the green transition fair for all, including subsidies to support energy efficient renovations, investment in public transport and rules and incentives for private companies.**

- More than six in ten Europeans (62%) are in favour of allocating a quota of energy to each citizen to ensure everyone makes their fair share of effort to tackle climate change.
- Over seven in ten (71%) are in favour of taxing products and services that contribute most to climate change and redistributing revenues to the poorest and most vulnerable households.
- Almost nine in ten (89%) are in favour of subsidising people to help making their homes more energy efficient, especially those with a lower disposable income and the most vulnerable households.
- Similarly, 89% are in favour of increasing their country's investments in public transport infrastructure.
- A large majority (87%) are in favour of encouraging private companies, through rules and incentives, to (1) reduce their emissions faster, (2) switch to more energy-efficient production methods, (3) adopt more circular and sustainable processes and (4) retrain their workforce as needed.

**Most respondents live within a ten-minute walk of a good quality green space. The satisfaction with the nearest green space is to some extent lower in urban areas.**

# **I. A FAIR GREEN TRANSITION IS ESSENTIAL AND ASSOCIATED WITH OPPORTUNITIES**

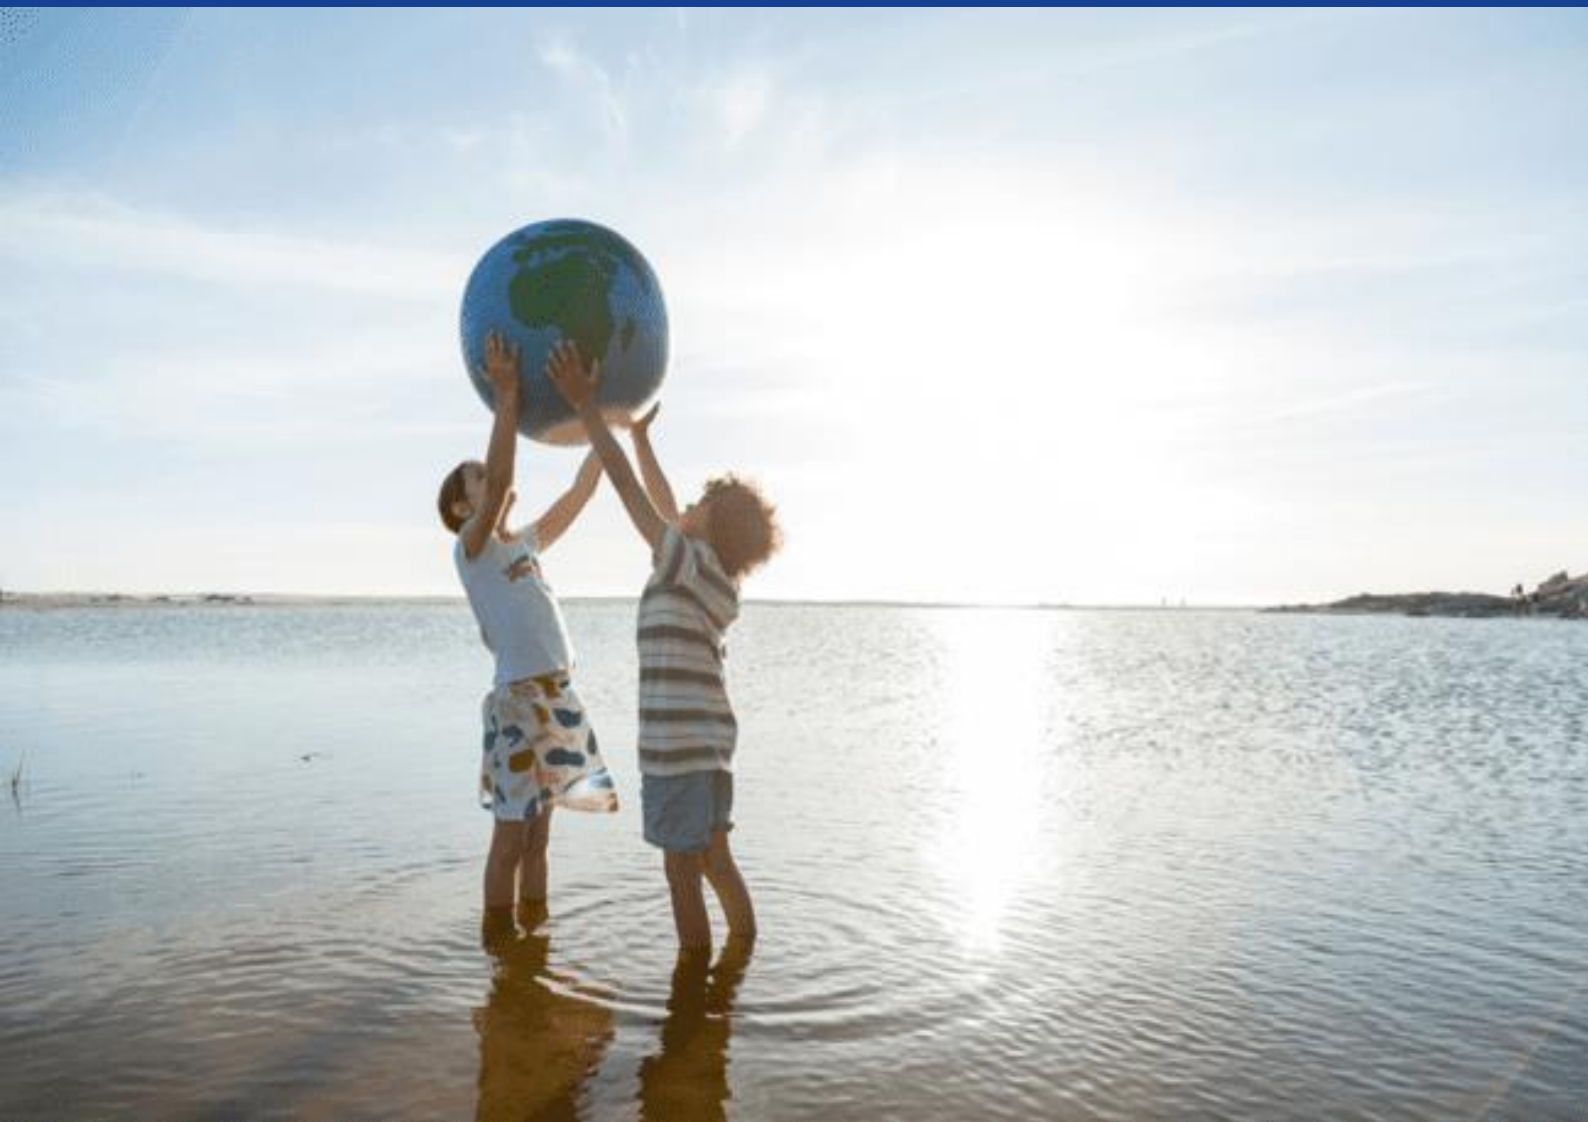



## 1. The need for a fair green transition

The majority of respondents agree that no one should be left behind in the green transition, but a minority is confident that by 2050 sustainable energy, services and products will be affordable for everyone.

Almost nine in ten respondents (88%) agree that the green transition should not leave anyone behind, with half (50%) saying they “totally agree”.<sup>11</sup> Fewer than one in ten (8%) disagree with this statement, with just 2% saying they “totally disagree”.

More than seven in ten respondents in each Member State agree that the green transition should not leave anyone behind, with proportions ranging from 97% in Cyprus and 95% in Luxembourg and Malta to 72% in Romania, 78% in Bulgaria and 80% in Estonia.

QA1.2 To what extent do you agree or disagree with the following statements?  
The green transition should not leave anyone behind  
(% - EU27)

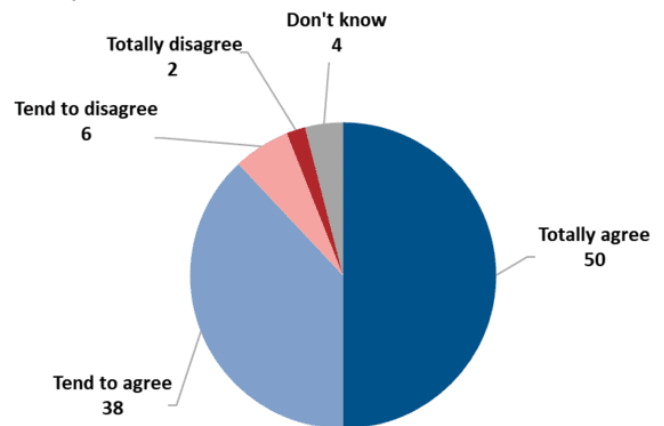

(May / Jun. 2022)

QA1.2 To what extent do you agree or disagree with the following statements?  
(% - The green transition should not leave anyone behind)

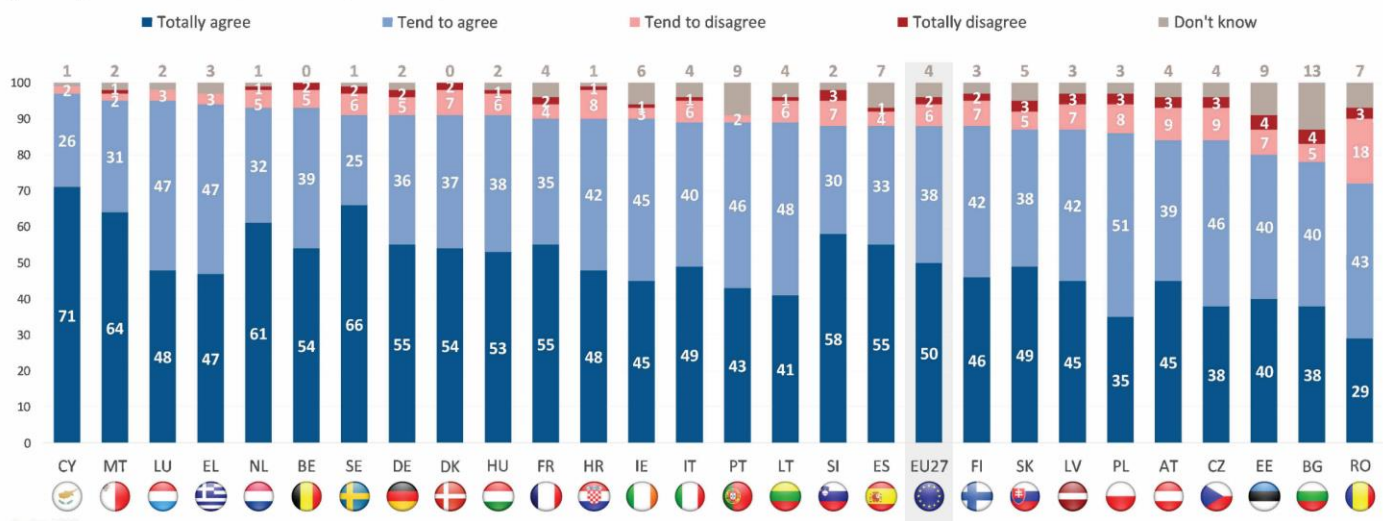

<sup>11</sup>QA1.2. To what extent do you agree or disagree with the following statements? The green transition should not leave anyone behind

## Special Eurobarometer 527

### Fairness perceptions of the green transition

Confidence that by 2050 sustainable energy, products and services will be affordable for everyone, including poorer people, is less widespread, with 46% saying they agree, including 14% who totally agree.<sup>12</sup> Almost as many (48%) disagree, with 17% saying they “totally disagree”. Just over one in twenty (6%) say they don’t know.

In seven countries, including Italy (71%), Romania (61%) and Croatia (60%), the majority agrees that by 2050 sustainable energy, products and services will be affordable for everyone. In contrast, only 30% in France, 31% in Czechia and 32% in Slovenia agree.

**QA1.4 To what extent do you agree or disagree with the following statements?**  
You are confident that by 2050 sustainable energy, products and services will be affordable for everyone, including poorer people  
(% - EU27)

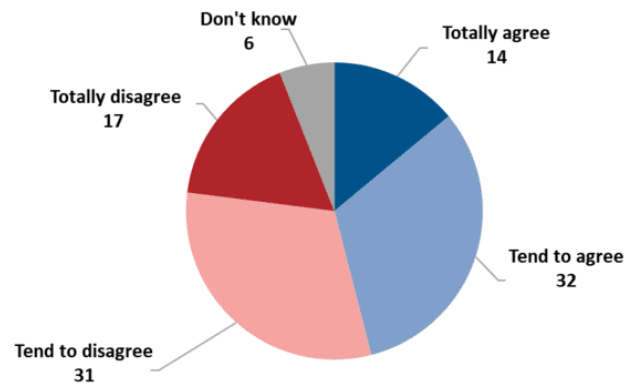

(May / Jun. 2022)

**QA1.4 To what extent do you agree or disagree with the following statements?**

(% - You are confident that by 2050 sustainable energy, products and services will be affordable for everyone, including poorer people)

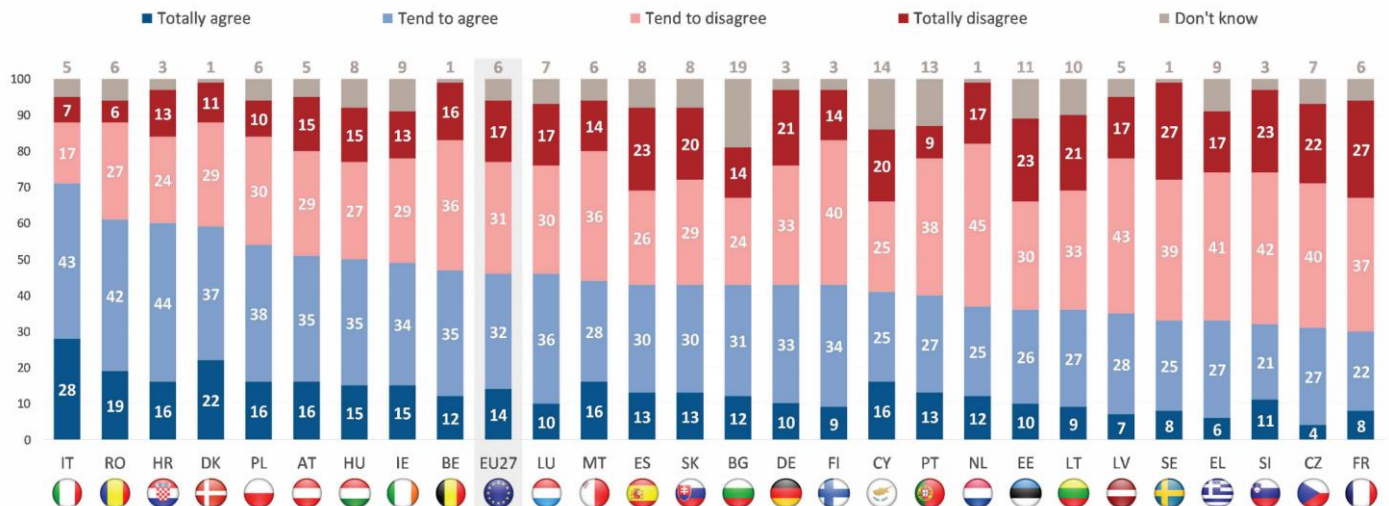

<sup>12</sup> QA1.4. To what extent do you agree or disagree with the following statements? You are confident that by 2050 sustainable energy, products

and services will be affordable for everyone, including poorer people

## Special Eurobarometer 527

### Fairness perceptions of the green transition

The **socio-demographic analysis** at “EU level” illustrates a range of differences. Respondents who are young, experience few difficulties paying bills, living in big cities, or with a positive view of the EU are more likely to be confident that by 2050 sustainable energy products and services will be affordable for everyone.

- The younger the respondent, the more likely they are to be confident that by 2050 sustainable energy products and services will be affordable for everyone. For instance, 52% of 15-24 years old are confident that by 2050 sustainable energy, products and services will be affordable, compared to 43% of those aged 55+.
- The higher the level of education of respondents is, the higher the agreement that the green transition should not leave anyone behind. For example, 92% of respondents with a university degree agree that the green transition should not leave anyone behind, compared to 74% with an education level below secondary.
- The fewer difficulties a respondent experiences paying bills, the more likely they are confident that by 2050 sustainable energy products and services will be affordable for everyone. For example, 46% with the least financial difficulties agree that by 2050, sustainable energy options will be affordable for everyone, compared to 34% of those who experience the most difficulties.
- Respondents in big cities (49%) are more likely than any other group to be confident that by 2050, sustainable energy options will be affordable for everyone.
- Finally, respondents with a positive view of the EU (52%) are more likely to be confident that by 2050 sustainable energy products and services will be affordable for everyone than those with a negative view (34%).

**Special Eurobarometer 527**  
**Fairness perceptions of the green transition**

**QA1** To what extent do you agree or disagree with the following statements?  
 (% - Total Agree)

|                                                                                                                      | The green transition should not leave anyone behind | By 2050 sustainable energy, products, services will be affordable for everyone |
|----------------------------------------------------------------------------------------------------------------------|-----------------------------------------------------|--------------------------------------------------------------------------------|
| EU27                                                                                                                 | 88                                                  | 46                                                                             |
|  <b>Gender</b>                      |                                                     |                                                                                |
| Man                                                                                                                  | 88                                                  | 47                                                                             |
| Woman                                                                                                                | 89                                                  | 45                                                                             |
|  <b>Age</b>                         |                                                     |                                                                                |
| 15-24                                                                                                                | 89                                                  | 52                                                                             |
| 25-39                                                                                                                | 90                                                  | 49                                                                             |
| 40-54                                                                                                                | 90                                                  | 46                                                                             |
| 55 +                                                                                                                 | 87                                                  | 43                                                                             |
|  <b>Difficulties paying bills</b> |                                                     |                                                                                |
| Most of the time                                                                                                     | 86                                                  | 34                                                                             |
| From time to time                                                                                                    | 86                                                  | 50                                                                             |
| Almost never/ Never                                                                                                  | 90                                                  | 46                                                                             |
| <b>Image of the EU</b>                                                                                               |                                                     |                                                                                |
| Total 'Positive'                                                                                                     | 93                                                  | 52                                                                             |
| Neutral                                                                                                              | 87                                                  | 44                                                                             |
| Total 'Negative'                                                                                                     | 82                                                  | 34                                                                             |
| <b>Total disposable income - quintile</b>                                                                            |                                                     |                                                                                |
| 1st quintile                                                                                                         | 86                                                  | 40                                                                             |
| 2nd quintile                                                                                                         | 89                                                  | 42                                                                             |
| 3rd quintile                                                                                                         | 90                                                  | 46                                                                             |
| 4th quintile                                                                                                         | 91                                                  | 49                                                                             |
| 5th quintile                                                                                                         | 91                                                  | 47                                                                             |
| <b>Employment status</b>                                                                                             |                                                     |                                                                                |
| Employed on an open ended contract                                                                                   | 91                                                  | 48                                                                             |
| Employed on a short-term contract                                                                                    | 88                                                  | 45                                                                             |
| Employed with a temporary work agency / an online platform                                                           | 86                                                  | 63                                                                             |
| Self-employed without employees                                                                                      | 89                                                  | 43                                                                             |
| Self-employed with employees                                                                                         | 88                                                  | 48                                                                             |
| Unemployed                                                                                                           | 90                                                  | 41                                                                             |
| Retired                                                                                                              | 86                                                  | 42                                                                             |
| Looking after home, inactive                                                                                         | 83                                                  | 44                                                                             |
| Student                                                                                                              | 91                                                  | 55                                                                             |
| Other                                                                                                                | 99                                                  | 31                                                                             |
| <b>What is the highest level of education you completed? (ONE ANSWER ONLY)</b>                                       |                                                     |                                                                                |
| Below secondary                                                                                                      | 74                                                  | 37                                                                             |
| Secondary                                                                                                            | 89                                                  | 48                                                                             |
| Post secondary                                                                                                       | 91                                                  | 42                                                                             |
| University                                                                                                           | 92                                                  | 45                                                                             |
| <b>Which of the following best describes the area where you live?</b>                                                |                                                     |                                                                                |
| A big city                                                                                                           | 91                                                  | 49                                                                             |
| The suburbs or outskirts of a big city                                                                               | 88                                                  | 41                                                                             |
| A town or a small city                                                                                               | 89                                                  | 47                                                                             |
| A country village                                                                                                    | 87                                                  | 44                                                                             |
| A farm or home in the countryside                                                                                    | 89                                                  | 45                                                                             |

## Special Eurobarometer 527

### Fairness perceptions of the green transition

#### Around half of respondents think that the EU, national governments and local authorities are doing enough to ensure the green transition is fair

Half (50%) of all respondents agree that the EU is doing enough to ensure a fair green transition, with 14% saying they “totally agree”.<sup>13</sup> On the other hand, 43% disagree, with 12% totally disagreeing. More than one in twenty (7%) say they don’t know.

Half (50%) also agree that their regional, city, or local public authorities are doing enough to ensure the green transition is fair, with 14% saying they “totally agree”. More than four in ten (45%) disagree, with 12% saying they “totally disagree”. One in twenty (5%) say they don’t know.

Almost half (47%) of all respondents think that their national government is doing enough to ensure the green transition is fair, with 14% totally agreeing. A slight majority (49%), however, disagrees, with 15% saying that they “totally disagree” that their national government is doing enough.

Four in ten (43%) respondents agree that private companies and businesses are doing enough to ensure the green transition is fair, with 11% saying they totally agree. The majority, however, disagrees (52%), with 15% saying that they “totally disagree”. One in twenty (5%) say they don’t know.

QA2. To what extent do you agree or disagree that each of the following actors is doing enough to ensure that the green transition is fair?  
(% - EU)

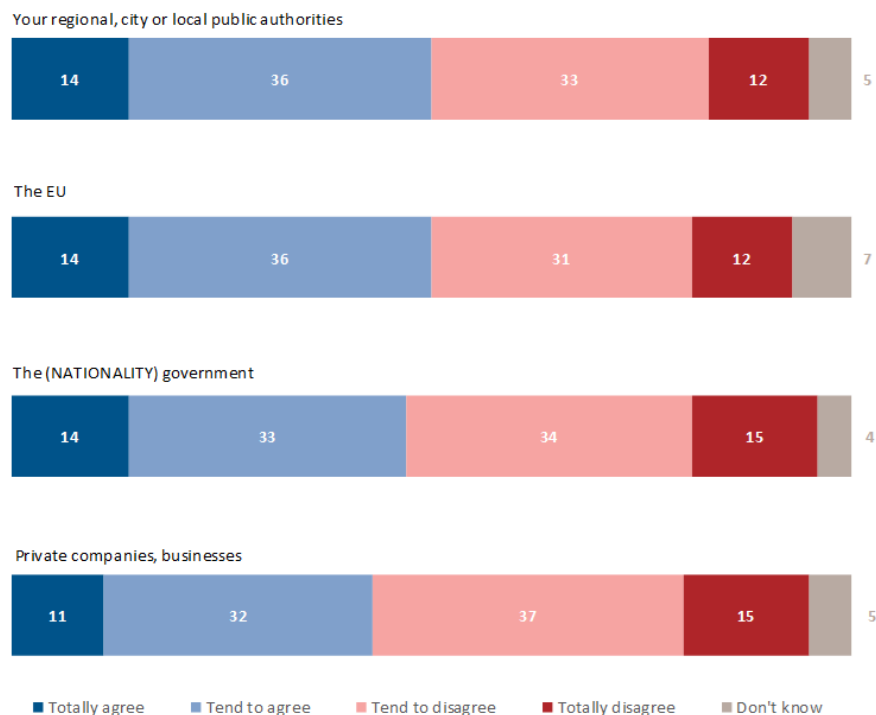

<sup>13</sup> QA2. To what extent do you agree or disagree that each of the following actors is doing enough to ensure that the green transition is fair? 2.1 Private companies, businesses. 2.2 Your regional, city or local

public authorities. 2.3 The (NATIONALITY) government. 2.4 The EU

## Special Eurobarometer 527

### Fairness perceptions of the green transition

In 23 EU Member States, a majority of respondents think that the EU is doing enough to ensure a fair green transition, although proportions range from 78% in Malta, 69% in Cyprus and 68% in Poland to 45% in Bulgaria. In the remaining four countries, a minority agree, with 37% in France, 41% in Greece, and 42% in both Germany and Slovakia.

It is worth noting that more than one in five (21%) in Bulgaria are unable to answer.

**QA2.4 To what extent do you agree or disagree that each of the following actors is doing enough to ensure that the green transition is fair?**  
The EU  
(% - EU27)

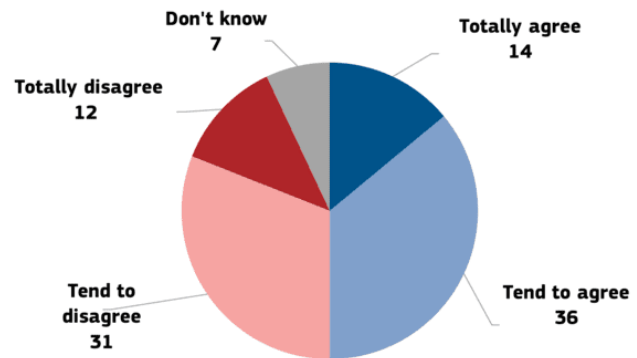

(May / Jun. 2022)

**QA2.4 To what extent do you agree or disagree that each of the following actors is doing enough to ensure that the green transition is fair?**  
(% - The EU)

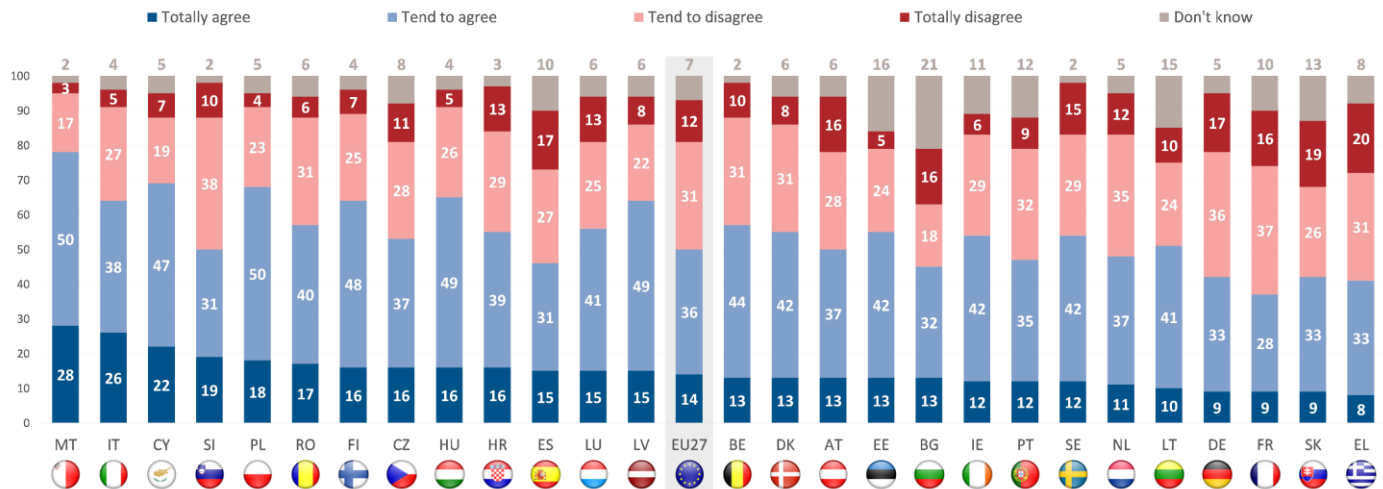



## Special Eurobarometer 527

### Fairness perceptions of the green transition

In 14 countries, a majority of respondents agree that their national government is doing enough to ensure the green transition is fair, with the highest levels of agreement in Finland (71%), Luxembourg (67%) and Malta (64%). In contrast, only 30% in Bulgaria, 31% in Greece and 33% in Slovakia agree that their government is doing enough.

There are also some clusters of countries that can be highlighted. For example, Nordic countries tend to have a high support for their national government. As such, at least six in ten respondents agree that their national government is doing enough in Finland (71%), Denmark (63%) and Sweden (60%).

QA2.3 To what extent do you agree or disagree that each of the following actors is doing enough to ensure that the green transition is fair?  
The (NATIONALITY) government  
(% - EU27)

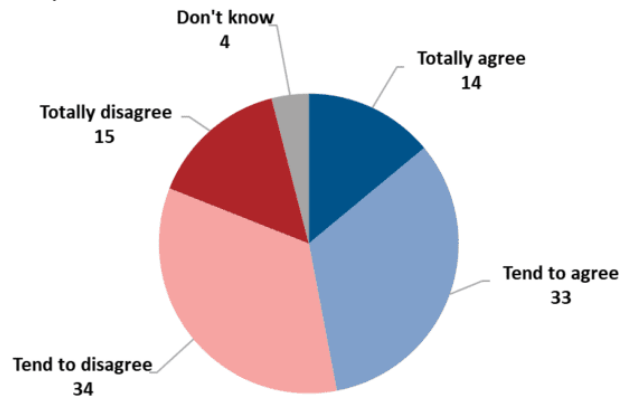

(May / Jun. 2022)

QA2.3 To what extent do you agree or disagree that each of the following actors is doing enough to ensure that the green transition is fair?  
(% - The (NATIONALITY) government)

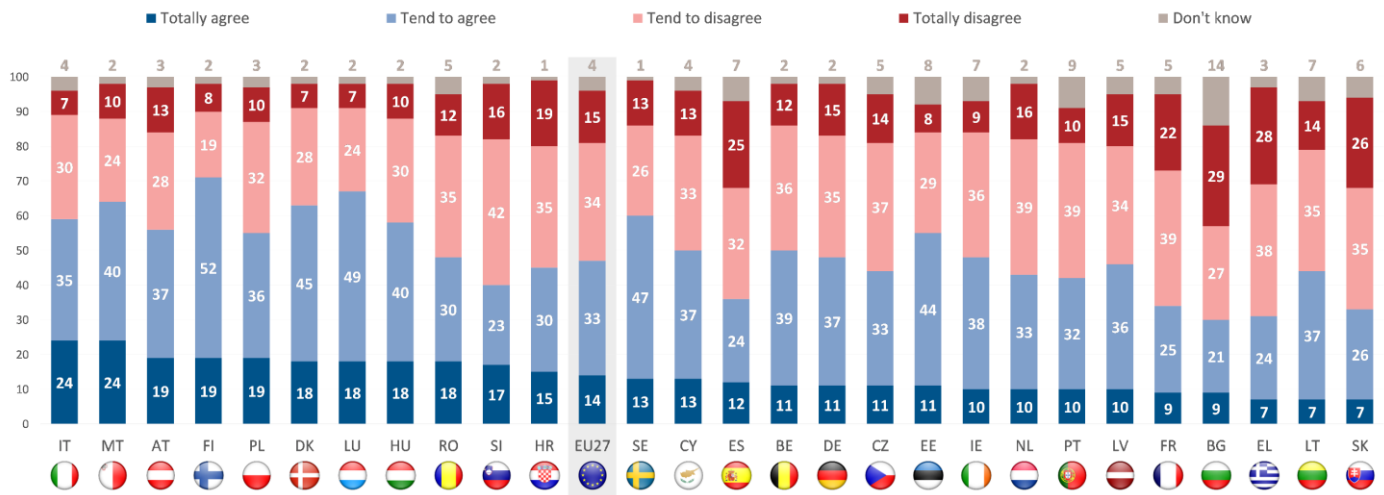

## Special Eurobarometer 527

### Fairness perceptions of the green transition

There is also considerable variation between the EU Member States, in opinion, when it comes to regional, city or local public authorities. In 17 countries, a majority agrees that these authorities are doing enough to ensure the green transition is fair, although proportions vary from 68% in Finland, 64% in Luxembourg and 62% in Denmark to 48% in Ireland. At the other end of the scale, only 26% in Greece, 32% in Bulgaria and 40% in Lithuania and Spain agree.

Similar to the support for national governments, Nordic countries tend to have a high support rate for regional, city or local public authorities, with at least six in ten respondents saying they agree.

QA2.2 To what extent do you agree or disagree that each of the following actors is doing enough to ensure that the green transition is fair?  
Your regional, city or local public authorities  
(% - EU27)

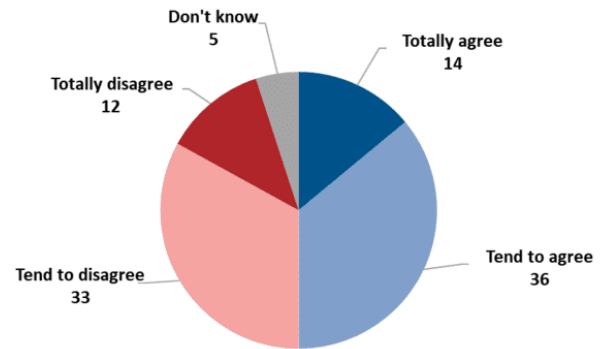

(May / Jun. 2022)

QA2.2 To what extent do you agree or disagree that each of the following actors is doing enough to ensure that the green transition is fair?  
(% - Your regional, city or local public authorities)

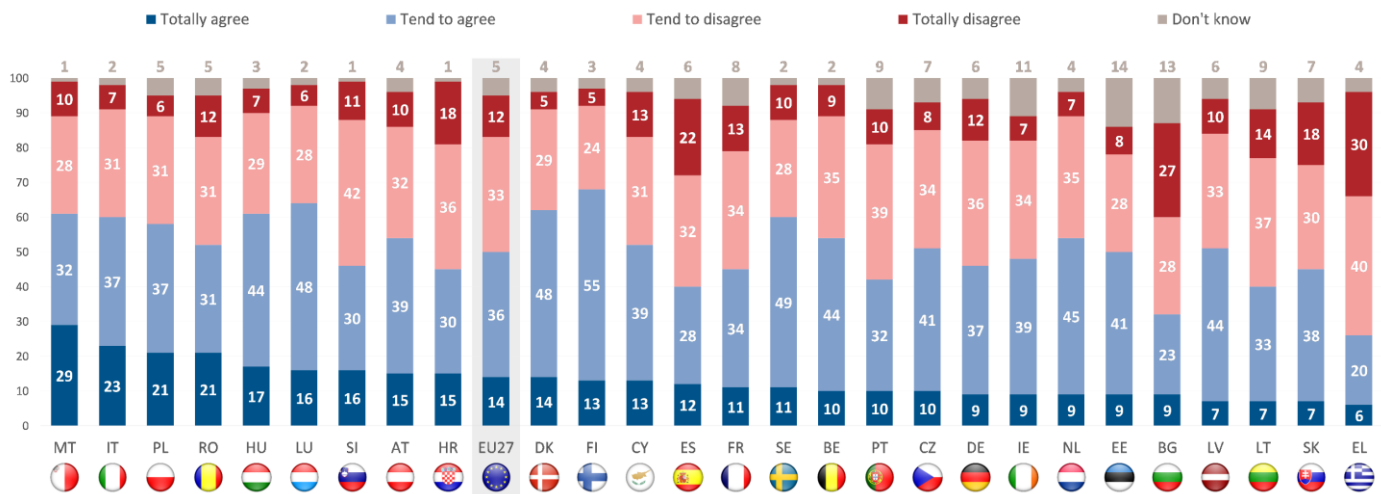

## Special Eurobarometer 527

### Fairness perceptions of the green transition

Agreement that private companies are doing enough varies considerably between countries. There are seven countries where the majority agrees, with the largest proportions seen in Italy (64%), Denmark, Hungary and Malta (54%) and Finland (53%). At the other end of the scale, only 25% in Bulgaria, 27% in Lithuania and Greece and 31% in France agree that private companies and businesses are doing enough.

It is worth noting that almost one in five (18%) in Bulgaria say that they "don't know".

QA2.1 To what extent do you agree or disagree that each of the following actors is doing enough to ensure that the green transition is fair?

Private companies, businesses  
(% - EU27)

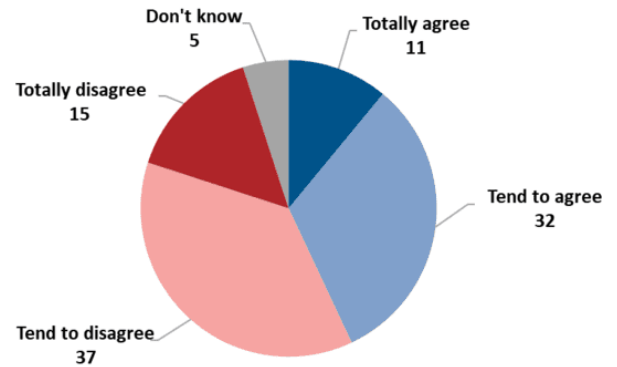

(May/Jun. 2022)

QA2.1 To what extent do you agree or disagree that each of the following actors is doing enough to ensure that the green transition is fair?  
(% - Private companies, businesses)

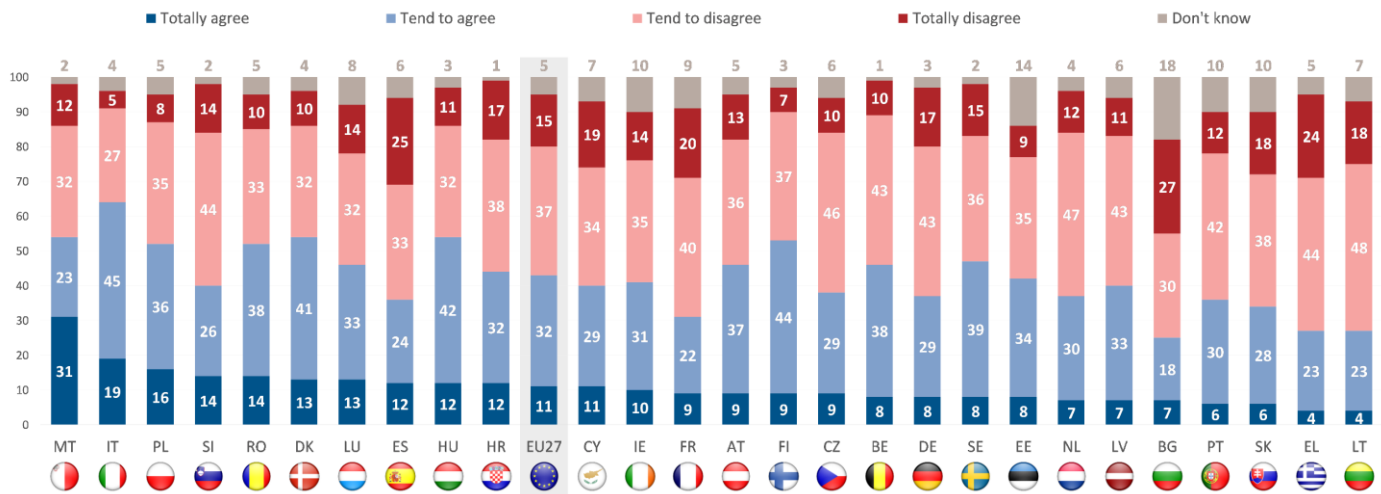

## Special Eurobarometer 527

### Fairness perceptions of the green transition

The **socio-demographic analysis at EU level** shows that the younger the respondent, the more likely they are to agree that the EU is doing enough to ensure a fair green transition: 55% of 15–24-year-olds think this way compared to 48% of those aged 55+. It also highlights the following:

- Respondents who experience the most financial difficulties are the least likely to agree that each of these actors is doing enough. For example, 38% of those who have difficulty paying their bills most of the time think that their national government is doing enough, compared to 47% who experience fewer difficulties.
- In addition, respondents with disposable income in the 1<sup>st</sup> quintile are the least likely to agree that each of these actors is doing enough.
- Respondents living on farms or homes in the countryside are the most likely to agree that each of these actors is doing enough. For example, 56% of those living on farms or homes in the countryside think that their national government is doing enough, compared to 48% who live in big cities.
- Finally, respondents with a positive image of the EU are more likely to think that each level of government is doing enough. For instance, 59% with a positive view of the EU think that it is doing enough, compared to 32% with a negative view.

**Special Eurobarometer 527**  
**Fairness perceptions of the green transition**

**QA2** To what extent do you agree or disagree that each of the following actors is doing enough to ensure that the green transition is fair?  
(% - Total 'Agree')

|                                                                                | Your regional, city or local public authorities | The EU | The (NATIONALITY) government | Private companies, businesses |
|--------------------------------------------------------------------------------|-------------------------------------------------|--------|------------------------------|-------------------------------|
| EU27                                                                           | 50                                              | 50     | 47                           | 43                            |
| <b>Gender</b>                                                                  |                                                 |        |                              |                               |
| Man                                                                            | 51                                              | 51     | 48                           | 45                            |
| Woman                                                                          | 48                                              | 49     | 45                           | 42                            |
| <b>Age</b>                                                                     |                                                 |        |                              |                               |
| 15-24                                                                          | 51                                              | 55     | 47                           | 43                            |
| 25-39                                                                          | 50                                              | 53     | 47                           | 44                            |
| 40-54                                                                          | 50                                              | 51     | 47                           | 43                            |
| 55 +                                                                           | 49                                              | 48     | 46                           | 41                            |
| <b>Difficulties paying bills</b>                                               |                                                 |        |                              |                               |
| Most of the time                                                               | 40                                              | 42     | 38                           | 34                            |
| From time to time                                                              | 49                                              | 50     | 47                           | 45                            |
| Almost never/ Never                                                            | 51                                              | 52     | 47                           | 43                            |
| <b>Image of the EU</b>                                                         |                                                 |        |                              |                               |
| Total 'Positive'                                                               | 54                                              | 59     | 52                           | 46                            |
| Neutral                                                                        | 49                                              | 47     | 45                           | 42                            |
| Total 'Negative'                                                               | 39                                              | 32     | 35                           | 35                            |
| <b>Total disposable income - quintile</b>                                      |                                                 |        |                              |                               |
| 1st quintile                                                                   | 45                                              | 45     | 43                           | 37                            |
| 2nd quintile                                                                   | 53                                              | 50     | 49                           | 43                            |
| 3rd quintile                                                                   | 51                                              | 51     | 46                           | 42                            |
| 4th quintile                                                                   | 51                                              | 53     | 49                           | 42                            |
| 5th quintile                                                                   | 52                                              | 56     | 51                           | 44                            |
| <b>Employment status</b>                                                       |                                                 |        |                              |                               |
| Employed on an open ended contract                                             | 51                                              | 53     | 48                           | 45                            |
| Employed on a short-term contract                                              | 49                                              | 49     | 44                           | 36                            |
| Employed with a temporary work agency / an online platform                     | 59                                              | 58     | 57                           | 59                            |
| Self-employed without employees                                                | 43                                              | 47     | 42                           | 42                            |
| Self-employed with employees                                                   | 50                                              | 48     | 50                           | 50                            |
| Unemployed                                                                     | 45                                              | 47     | 41                           | 42                            |
| Retired                                                                        | 50                                              | 48     | 46                           | 40                            |
| Looking after home, inactive                                                   | 42                                              | 46     | 44                           | 38                            |
| Student                                                                        | 52                                              | 56     | 47                           | 43                            |
| Other                                                                          | 48                                              | 37     | 34                           | 39                            |
| <b>What is the highest level of education you completed? (ONE ANSWER ONLY)</b> |                                                 |        |                              |                               |
| Below secondary                                                                | 42                                              | 40     | 41                           | 39                            |
| Secondary                                                                      | 51                                              | 52     | 48                           | 44                            |
| Post secondary                                                                 | 49                                              | 46     | 43                           | 41                            |
| University                                                                     | 49                                              | 52     | 46                           | 40                            |
| <b>Which of the following best describes the area where you live?</b>          |                                                 |        |                              |                               |
| A big city                                                                     | 51                                              | 54     | 48                           | 44                            |
| The suburbs or outskirts of a big city                                         | 46                                              | 44     | 43                           | 37                            |
| A town or a small city                                                         | 50                                              | 50     | 46                           | 43                            |
| A country village                                                              | 49                                              | 50     | 47                           | 42                            |
| A farm or home in the countryside                                              | 55                                              | 55     | 56                           | 52                            |

## 2. Job opportunities and skills in the green transition

A majority of respondents think that policies to tackle climate change will create more jobs than they will remove, as well as more quality jobs.

Almost six in ten respondents (57%) agree that policies to fight climate change will create more new jobs than they remove, with 15% totally agreeing.<sup>14</sup> Almost three in ten (29%) disagree, with 7% saying they “totally disagree”. More than one in ten (14%) say they don’t know.

In 25 countries, a majority of respondents agree that policies to fight climate change will create more new jobs than they remove, although proportions vary from 73% in Malta, 72% in Sweden and 68% in Italy and Denmark to 38% in Estonia. In Latvia (35%) and Czechia (39%), only a minority agree.

It is worth noting more than one quarter in Bulgaria (29%), Portugal (27%) and Estonia (both 27%) say they don’t know.

QA10.3 To what extent do you agree or disagree with the following statements about the role of work and jobs in the green transition?  
Policies to fight climate change will create more new jobs than they will remove (% - EU27)

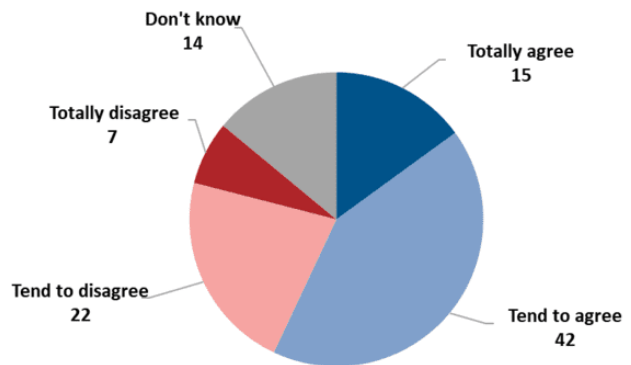

(May / Jun. 2022)

QA10.3 To what extent do you agree or disagree with the following statements about the role of work and jobs in the green transition?  
(% - Policies to fight climate change will create more new jobs than they will remove)

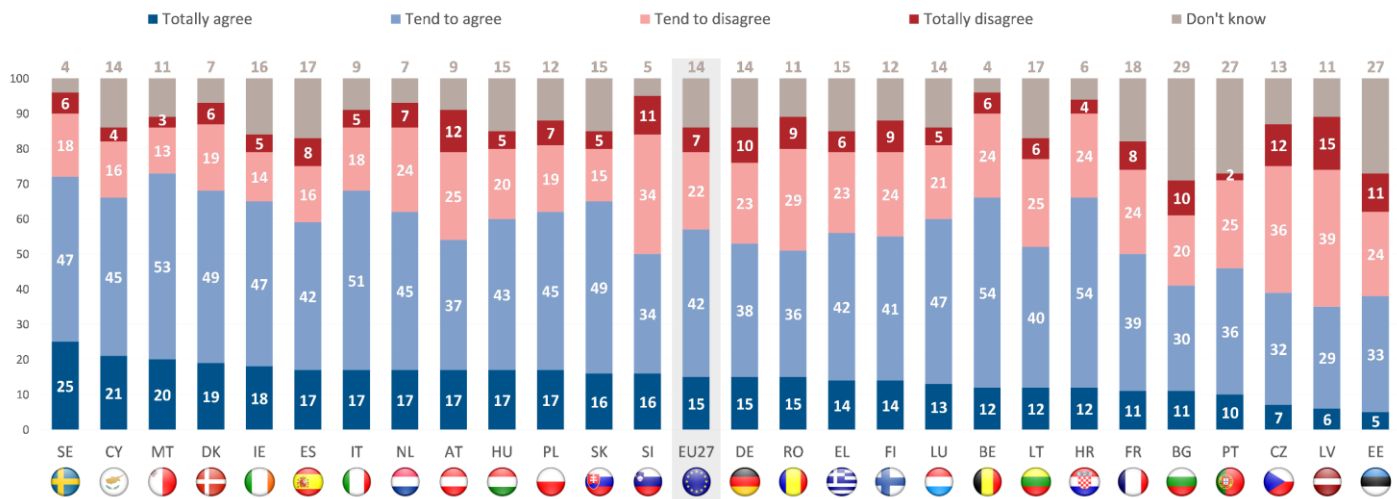

<sup>14</sup> QA10.3. To what extent do you agree or disagree with the following statements about the role of work and jobs in the green transition?

Policies to fight climate change will create more new jobs than they will remove



## Special Eurobarometer 527

### Fairness perceptions of the green transition

Over six in ten (61%) agree that policies to tackle climate change will create good quality jobs, with 16% saying they “totally agree”.<sup>15</sup> On the other hand, more than one quarter (27%) disagree with this statement, with 7% totally disagreeing. Just over one in ten (12%) say that they don't know.

A majority of respondents in 25 countries agree that policies to tackle climate change will create good quality jobs, although proportions range from 80% in Malta, 77% in Cyprus and 75% in Sweden to 45% in Estonia. Czechia (43%) and Latvia (42%) are the only countries where a minority agree.

It is worth noting there are four countries where at least one in five say they don't know: Bulgaria (27%), Portugal (26%), Estonia (25%) and Lithuania (20%).

QA10.4 To what extent do you agree or disagree with the following statements about the role of work and jobs in the green transition?

Policies to tackle climate change will create good quality jobs (in terms of earnings, job security and quality of the working environment)  
(% - EU27)

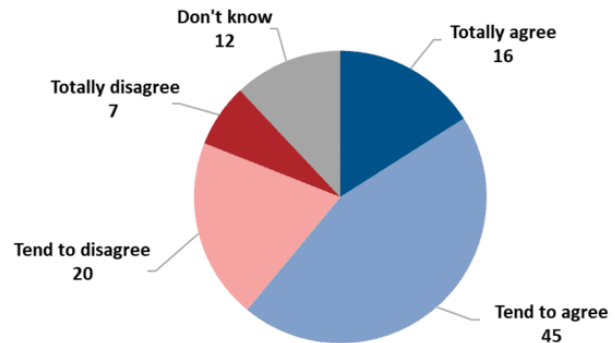

(May / Jun. 2022)

QA10.4 To what extent do you agree or disagree with the following statements about the role of work and jobs in the green transition?  
(% - Policies to tackle climate change will create good quality jobs (in terms of earnings, job security and quality of the working environment))

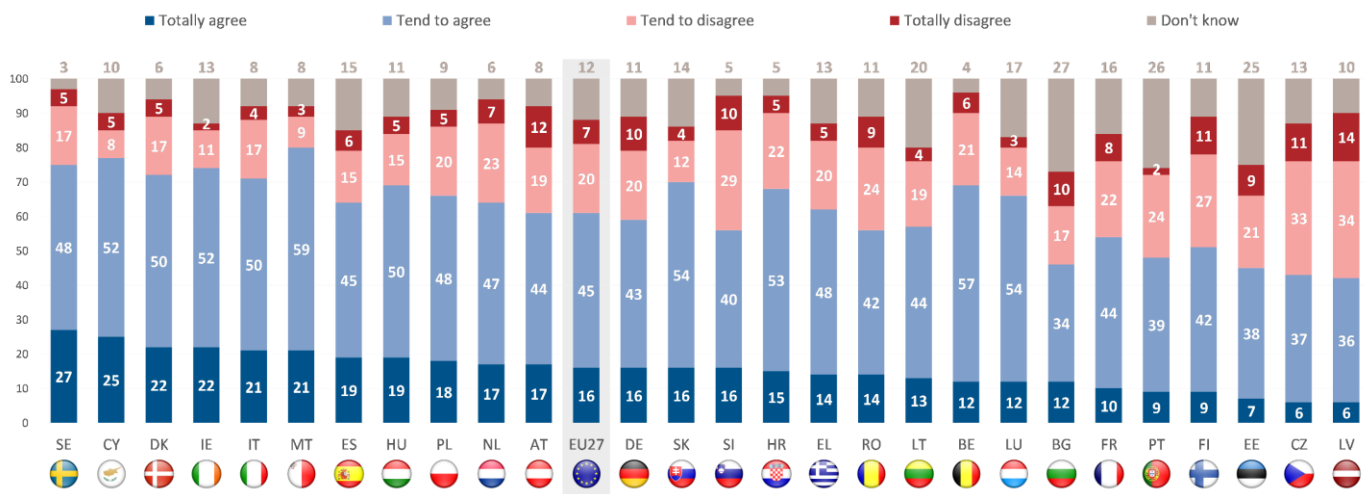

<sup>15</sup> QA10.4. To what extent do you agree or disagree with the following statements about the role of work and jobs in the green transition?

Policies to tackle climate change will create good quality jobs (in terms of earnings, job security and quality of the working environment).

## Special Eurobarometer 527

### Fairness perceptions of the green transition

The **socio-demographic analysis** at EU level shows no differences based on gender but does illustrate the following: respondents with high use of the internet, high levels of education, higher disposable income, or a positive image of the EU are more likely to agree with both statements.

- The younger the respondent, the more likely they are to agree that policies tackling climate change will create good quality jobs or that the policies will create more new jobs than they remove. For instance, 66% of those aged 15-39 agree that policies will create good quality jobs, compared to 57% of those aged 55+.
- Respondents who have a high use of the Internet are more likely to agree with both statements. For example, 64% who use the Internet every day agree that policies to tackle climate change will create good quality jobs, compared to 51% who never use the Internet.
- Respondents with high levels of education are more likely to agree with both statements. As such, 64% with a university level of education agree that policies to fight climate change will create more jobs than they will remove, compared to 45% with a secondary level of education.
- Respondents who experience the most difficulties paying bills are the least likely to agree with each statement.
- The higher disposable income a respondent has, the more likely they are to agree with each statement. For example, 62% in the 4<sup>th</sup> and 5<sup>th</sup> quintiles agree that policies will create more new jobs than they remove compared to 49% in the first quintile.
- The more urbanised a respondent's environment, the more likely they are to agree with each statement. For instance, 67% living in large towns think that policies will create good quality jobs, compared to 57% living in rural villages.
- Respondents with a positive image of the EU (71%) are much more likely to agree that policies tackling climate change will create good quality jobs than those with a negative view (44%). Those with a positive image (66%) are also more likely to say that the policies will create more new jobs than they remove, compared to those with a negative view (39%).
- Respondents without occupation and unskilled manual workers are the least likely to agree with both statements. For example, 53% with no current occupation agree that policies to tackle climate change will create good quality jobs, compared to 72% working as self-employed professionals.

**Special Eurobarometer 527**  
**Fairness perceptions of the green transition**

**QA10** To what extent do you agree or disagree with the following statements about the role of work and jobs in the green transition?  
 (% - Total 'Agree')

|                                                                                                                      | Policies to tackle climate change will create good quality jobs (in terms of earnings, job security and quality of the working environment) | Policies to fight climate change will create more new jobs than they will remove |
|----------------------------------------------------------------------------------------------------------------------|---------------------------------------------------------------------------------------------------------------------------------------------|----------------------------------------------------------------------------------|
| EU27                                                                                                                 | 61                                                                                                                                          | 57                                                                               |
|  <b>Gender</b>                      |                                                                                                                                             |                                                                                  |
| Man                                                                                                                  | 63                                                                                                                                          | 58                                                                               |
| Woman                                                                                                                | 60                                                                                                                                          | 56                                                                               |
|  <b>Age</b>                       |                                                                                                                                             |                                                                                  |
| 15-24                                                                                                                | 66                                                                                                                                          | 63                                                                               |
| 25-39                                                                                                                | 66                                                                                                                                          | 61                                                                               |
| 40-54                                                                                                                | 62                                                                                                                                          | 58                                                                               |
| 55 +                                                                                                                 | 57                                                                                                                                          | 53                                                                               |
|  <b>Difficulties paying bills</b> |                                                                                                                                             |                                                                                  |
| Most of the time                                                                                                     | 49                                                                                                                                          | 46                                                                               |
| From time to time                                                                                                    | 60                                                                                                                                          | 56                                                                               |
| Almost never/ Never                                                                                                  | 64                                                                                                                                          | 59                                                                               |
| <b>Image of the EU</b>                                                                                               |                                                                                                                                             |                                                                                  |
| Total 'Positive'                                                                                                     | 71                                                                                                                                          | 66                                                                               |
| Neutral                                                                                                              | 57                                                                                                                                          | 54                                                                               |
| Total 'Negative'                                                                                                     | 44                                                                                                                                          | 39                                                                               |
| <b>Total disposable income - quintile</b>                                                                            |                                                                                                                                             |                                                                                  |
| 1st quintile                                                                                                         | 52                                                                                                                                          | 49                                                                               |
| 2nd quintile                                                                                                         | 59                                                                                                                                          | 53                                                                               |
| 3rd quintile                                                                                                         | 62                                                                                                                                          | 59                                                                               |
| 4th quintile                                                                                                         | 67                                                                                                                                          | 62                                                                               |
| 5th quintile                                                                                                         | 67                                                                                                                                          | 62                                                                               |
| <b>Employment status</b>                                                                                             |                                                                                                                                             |                                                                                  |
| Employed on an open ended contract                                                                                   | 65                                                                                                                                          | 61                                                                               |
| Employed on a short-term contract                                                                                    | 61                                                                                                                                          | 56                                                                               |
| Employed with a temporary work agency / an online platform                                                           | 52                                                                                                                                          | 57                                                                               |
| Self-employed without employees                                                                                      | 65                                                                                                                                          | 59                                                                               |
| Self-employed with employees                                                                                         | 63                                                                                                                                          | 56                                                                               |
| Unemployed                                                                                                           | 56                                                                                                                                          | 52                                                                               |
| Retired                                                                                                              | 56                                                                                                                                          | 52                                                                               |
| Looking after home, inactive                                                                                         | 53                                                                                                                                          | 48                                                                               |

**Special Eurobarometer 527**  
**Fairness perceptions of the green transition**

**QA10** To what extent do you agree or disagree with the following statements about the role of work and jobs in the green transition?

(% - Total 'Agree')

|                                                                                                                          | Policies to tackle climate change will create good quality jobs (in terms of earnings, job security and quality of the working environment) | Policies to fight climate change will create more new jobs than they will remove |
|--------------------------------------------------------------------------------------------------------------------------|---------------------------------------------------------------------------------------------------------------------------------------------|----------------------------------------------------------------------------------|
| EU27                                                                                                                     | 61                                                                                                                                          | 57                                                                               |
| <b>What is the highest level of education you completed? (ONE ANSWER ONLY)</b>                                           |                                                                                                                                             |                                                                                  |
| Below secondary                                                                                                          | 44                                                                                                                                          | 45                                                                               |
| Secondary                                                                                                                | 59                                                                                                                                          | 55                                                                               |
| Post secondary                                                                                                           | 66                                                                                                                                          | 60                                                                               |
| University                                                                                                               | 70                                                                                                                                          | 64                                                                               |
| <b>Which of the following best describes the area where you live?</b>                                                    |                                                                                                                                             |                                                                                  |
| A big city                                                                                                               | 67                                                                                                                                          | 62                                                                               |
| The suburbs or outskirts of a big city                                                                                   | 61                                                                                                                                          | 58                                                                               |
| A town or a small city                                                                                                   | 61                                                                                                                                          | 56                                                                               |
| A country village                                                                                                        | 56                                                                                                                                          | 53                                                                               |
| A farm or home in the countryside                                                                                        | 59                                                                                                                                          | 59                                                                               |
| <b>What is your current occupation?</b>                                                                                  |                                                                                                                                             |                                                                                  |
| Responsible for ordinary shopping and looking after the home, or without any current occupation, not working             | 53                                                                                                                                          | 49                                                                               |
| Student                                                                                                                  | 69                                                                                                                                          | 64                                                                               |
| Unemployed or temporarily not working                                                                                    | 56                                                                                                                                          | 53                                                                               |
| Retired or unable to work through illness                                                                                | 55                                                                                                                                          | 52                                                                               |
| Self-employed farmer                                                                                                     | 59                                                                                                                                          | 54                                                                               |
| Self-employed fisherman                                                                                                  | 80                                                                                                                                          | 75                                                                               |
| Self-employed professional (lawyer, medical practitioner, accountant,                                                    | 72                                                                                                                                          | 65                                                                               |
| Owner of a shop, craftsmen, other self-employed person                                                                   | 68                                                                                                                                          | 62                                                                               |
| Business proprietors, owner (full or partner) of a company                                                               | 55                                                                                                                                          | 56                                                                               |
| Employed professional (employed doctor, lawyer, accountant,                                                              | 59                                                                                                                                          | 58                                                                               |
| Employed position, general management, director or top management (managing directors, director general, other director) | 71                                                                                                                                          | 71                                                                               |
| Employed position, middle management, other management (department head, junior manager, teacher, technician)            | 70                                                                                                                                          | 64                                                                               |
| Employed position, working mainly at a desk                                                                              | 68                                                                                                                                          | 63                                                                               |
| Employed position, not at a desk but travelling (salesmen, driver, etc.)                                                 | 62                                                                                                                                          | 61                                                                               |
| Employed position, not at a desk, but in a service job (hospital,                                                        | 62                                                                                                                                          | 57                                                                               |
| Employed position, supervisor                                                                                            | 67                                                                                                                                          | 64                                                                               |
| Employed position, skilled manual worker                                                                                 | 61                                                                                                                                          | 56                                                                               |
| Other employed (unskilled) manual worker, servant                                                                        | 51                                                                                                                                          | 49                                                                               |

## Special Eurobarometer 527

### Fairness perceptions of the green transition

Being in a job that contributes to the green transition is important for the majority of respondents, but only around one third think that their current job contributes to it.

A majority (54%) of respondents agree that their current skills allow them to contribute to the green transition, with 14% saying they “totally agree”.<sup>16</sup> Almost four in ten (38%) disagree, with 13% totally disagreeing. Almost one in ten (8%) say they don't know.

A majority of respondents in 24 EU Member States agree that their current skills allow them to contribute to the green transition, although proportions range from 85% in Sweden, 75% in Malta and 73% in Slovenia to 46% in France. In contrast, only a minority in Greece, Bulgaria (both 35%) and Romania (44%) agree.

The proportions who say they don't know are particularly high in Bulgaria (15%) and Ireland (13%).

QA10.5 To what extent do you agree or disagree with the following statements about the role of work and jobs in the green transition?

Your current skills allow you to contribute to the green transition (% - EU27)

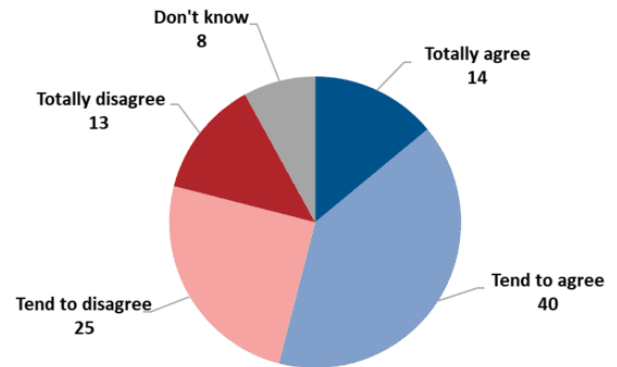

(May / Jun. 2022)

QA10.5 To what extent do you agree or disagree with the following statements about the role of work and jobs in the green transition?  
(% - Your current skills allow you to contribute to the green transition)

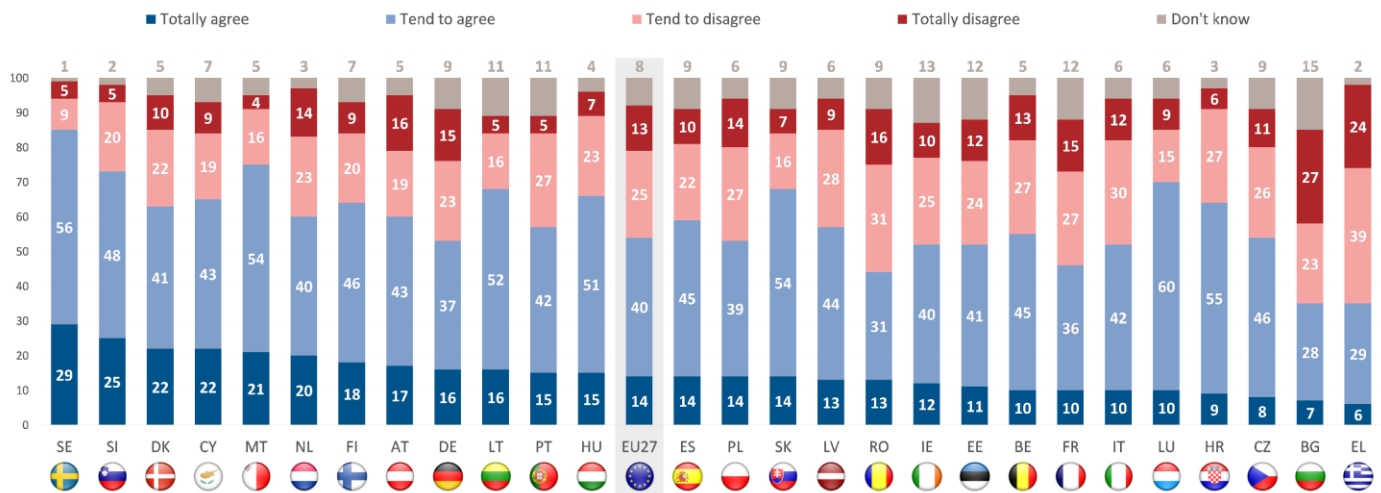

<sup>16</sup> QA10.5. To what extent do you agree or disagree with the following statements about the role of work and jobs in the green transition?

Your current skills allow you to contribute to the green transition.

## Special Eurobarometer 527

### Fairness perceptions of the green transition

More than half (55%) agree that being in a job that contributes to advancing the green transition is important to them personally, with 15% saying they “totally agree”.<sup>17</sup> One-third (33%) disagree, 12% “totally”, while 12% say they don’t know.

In 22 Member States, a majority of respondents agree that being in a job that contributes to advancing the green transition is important to them, with the highest proportions seen in Slovenia (83%), Cyprus (81%) and Malta (75%). Agreement is the minority opinion in Germany (40%), Bulgaria (41%), the Netherlands (43%) and Denmark (43%), while in Austria, opinion is divided (44% agree and 44% disagree).

More than one in five in Estonia (24%) and Lithuania (21%) say they don’t know.

QA10.2 To what extent do you agree or disagree with the following statements about the role of work and jobs in the green transition?  
Being in a job that contributes to advancing the green transition is important to you personally  
(% - EU27)

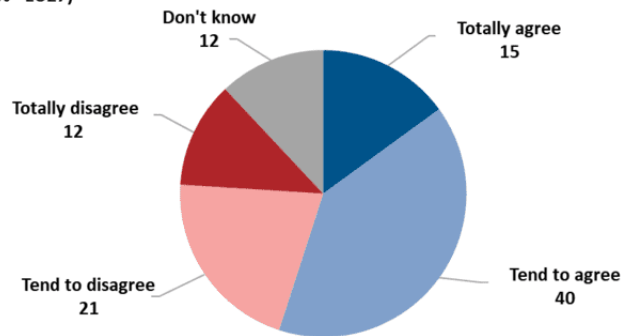

(May / Jun. 2022)

QA10.2 To what extent do you agree or disagree with the following statements about the role of work and jobs in the green transition?  
(% - Being in a job that contributes to advancing the green transition is important to you personally)

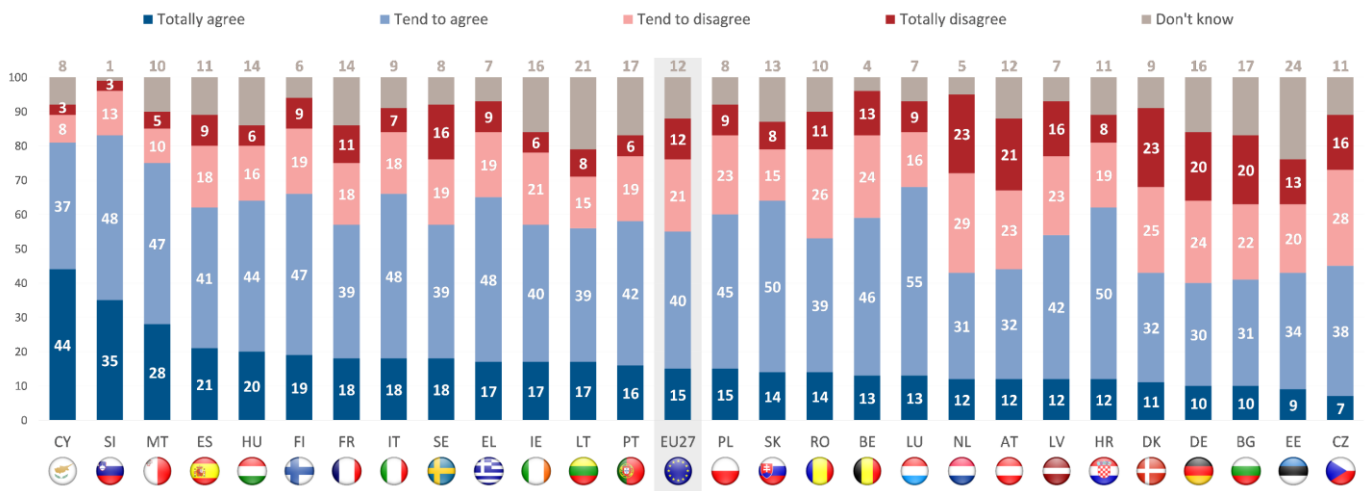

<sup>17</sup> QA10.2. To what extent do you agree or disagree with the following statements about the role of work and jobs in the green transition?

Being in a job that contributes to advancing the green transition is important to you personally.



## Special Eurobarometer 527

### Fairness perceptions of the green transition

Although (54%) the majority thinks that their current skills allow them to contribute to the green transition, only a minority (34%) agree that their job is contributing to advancing the green transition, with 9% totally agreeing.<sup>18</sup> Almost half (47%) disagree, with 23% saying they “totally disagree”. Almost one in five (19%) say they don’t know.

The proportion of respondents who agree that their job is contributing to the green transition varies considerably across the Member States. At least half in Slovenia (63%), Slovakia (55%), Malta (54%) and Hungary (53%) agree, compared to 22% in France and Bulgaria and 23% in Greece.

It is worth noting more than three in ten in Lithuania (42%), France (32%) and Portugal (30%) say they don’t know.

**QA10.1 To what extent do you agree or disagree with the following statements about the role of work and jobs in the green transition?**  
Your job is contributing to advancing the green transition  
(% - EU27)

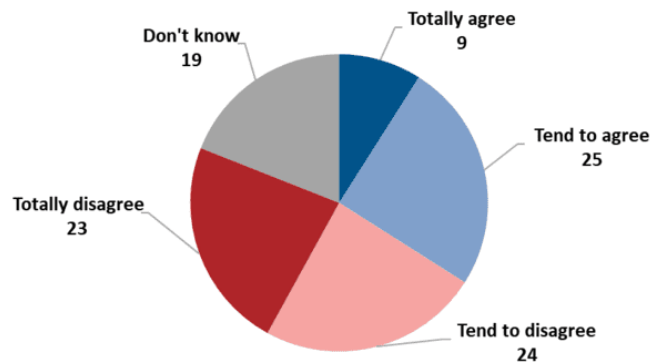

(May / Jun. 2022)

**QA10.1 To what extent do you agree or disagree with the following statements about the role of work and jobs in the green transition?**  
(% - Your job is contributing to advancing the green transition)

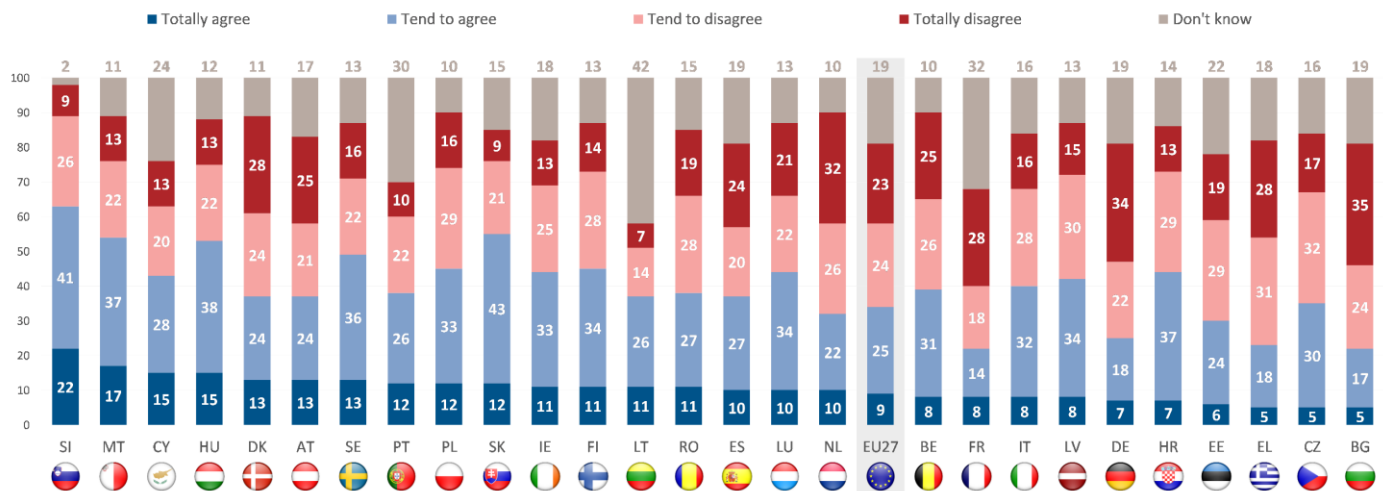

<sup>18</sup> QA10.1. To what extent do you agree or disagree with the following statements about the role of work and jobs in the green transition? Your job is contributing to advancing the green transition.

## Special Eurobarometer 527

### Fairness perceptions of the green transition

The **socio-demographic analysis** at EU level illustrates a range of differences: men, respondents with a high level of education, those who use the internet every day, and those who experience few financial difficulties are the most likely to agree that their current job or skills allow them to contribute to advancing the green transition.

- Men (56%) are more likely than women (51%) to agree that their current skills allow them to contribute to the green transition. Men (37%) are also more likely than women (31%) to say that their job contributes to advancing the green transition.
- Respondents aged 15-54 are more likely than older respondents to agree that being in a job that contributes to advancing the green transition is important to them or that their current skills allow them to contribute to the green transition. Those aged 25-54 are the most likely to agree that their job is contributing to advancing the green transition: more than four in ten agree, compared to 30% of 15-24-year-olds and 26% of those aged 55+.
- Respondents with a university level of education are the most likely to agree with the three statements compared to other groups. For example, 41% with a university level of education agree that their current job is contributing to advancing the green transition, compared to 18% with a level below secondary.
- Respondents who use the internet every day are more likely to agree with the three statements. For example, 59%, who use the Internet every day feel that being in a job that contributes to the green transition is important to them personally, compared to 43% who often/sometimes use the Internet and 38% who never use it.
- Respondents who are self-employed with employees (50%) are the most likely to agree that their job is advancing the green transition. Along with those employed on an open-ended contract, they are also the most likely to agree that their current skills allow them to contribute to the green transition (both 61%).
- Respondents who experience the most financial difficulties are the least likely to agree with each statement. Furthermore, the fewer financial difficulties a respondent experiences, the more likely they are to agree that their current skills allow them to contribute to the green transition.
- The higher disposable income a respondent has, the more likely they are to agree with each statement. For example, 65% in the 5<sup>th</sup> quintile agree that their current skills allow them to contribute to the green transition, compared to 43% in the 1<sup>st</sup> quintile.
- Respondents living in large towns (61%) are more likely to agree that being in a job that advances the green transition is important to them than those living in smaller towns (55%) or rural villages (51%).
- For occupation, there are certain groups who are more likely to think that they have the current skills to contribute to the green transition. For example, self-employed fishermen (85%); employed professionals such as lawyers, doctors, accountants, or architects (64%); employees in high- (76%) or middle-management positions (67%) are more likely than other groups to think that they have the necessary skills to contribute to the green transition.

**Special Eurobarometer 527**  
**Fairness perceptions of the green transition**

**QA10** To what extent do you agree or disagree with the following statements about the role of work and jobs in the green transition?  
 (% - Total 'Agree')

|                                                                                                                      | Being in a job that contributes to advancing the green transition is important to you personally | Your current skills allow you to contribute to the green transition | Your job is contributing to advancing the green transition |
|----------------------------------------------------------------------------------------------------------------------|--------------------------------------------------------------------------------------------------|---------------------------------------------------------------------|------------------------------------------------------------|
| EU27                                                                                                                 | 55                                                                                               | 54                                                                  | 34                                                         |
|  <b>Gender</b>                      |                                                                                                  |                                                                     |                                                            |
| Man                                                                                                                  | 55                                                                                               | 56                                                                  | 37                                                         |
| Woman                                                                                                                | 54                                                                                               | 51                                                                  | 31                                                         |
|  <b>Age</b>                         |                                                                                                  |                                                                     |                                                            |
| 15-24                                                                                                                | 64                                                                                               | 55                                                                  | 30                                                         |
| 25-39                                                                                                                | 63                                                                                               | 60                                                                  | 43                                                         |
| 40-54                                                                                                                | 61                                                                                               | 58                                                                  | 42                                                         |
| 55 +                                                                                                                 | 45                                                                                               | 48                                                                  | 26                                                         |
|  <b>Difficulties paying bills</b> |                                                                                                  |                                                                     |                                                            |
| Most of the time                                                                                                     | 48                                                                                               | 37                                                                  | 24                                                         |
| From time to time                                                                                                    | 56                                                                                               | 48                                                                  | 35                                                         |
| Almost never/ Never                                                                                                  | 55                                                                                               | 58                                                                  | 36                                                         |
| <b>Image of the EU</b>                                                                                               |                                                                                                  |                                                                     |                                                            |
| Total 'Positive'                                                                                                     | 61                                                                                               | 60                                                                  | 38                                                         |
| Neutral                                                                                                              | 52                                                                                               | 51                                                                  | 33                                                         |
| Total 'Negative'                                                                                                     | 43                                                                                               | 45                                                                  | 27                                                         |
| <b>Total disposable income - quintile</b>                                                                            |                                                                                                  |                                                                     |                                                            |
| 1st quintile                                                                                                         | 47                                                                                               | 43                                                                  | 23                                                         |
| 2nd quintile                                                                                                         | 52                                                                                               | 51                                                                  | 31                                                         |
| 3rd quintile                                                                                                         | 58                                                                                               | 57                                                                  | 36                                                         |
| 4th quintile                                                                                                         | 59                                                                                               | 58                                                                  | 40                                                         |
| 5th quintile                                                                                                         | 59                                                                                               | 65                                                                  | 44                                                         |
| <b>Employment status</b>                                                                                             |                                                                                                  |                                                                     |                                                            |
| Employed on an open ended contract                                                                                   | 61                                                                                               | 61                                                                  | 46                                                         |
| Employed on a short-term contract                                                                                    | 62                                                                                               | 55                                                                  | 38                                                         |
| Employed with a temporary work agency / an online platform                                                           | 66                                                                                               | 55                                                                  | 46                                                         |
| Self-employed without employees                                                                                      | 64                                                                                               | 60                                                                  | 42                                                         |
| Self-employed with employees                                                                                         | 57                                                                                               | 61                                                                  | 50                                                         |
| Unemployed                                                                                                           | 57                                                                                               | 52                                                                  | 27                                                         |
| Retired                                                                                                              | 41                                                                                               | 44                                                                  | 20                                                         |
| Looking after home, inactive                                                                                         | 47                                                                                               | 41                                                                  | 25                                                         |

**Special Eurobarometer 527**  
**Fairness perceptions of the green transition**

**QA10** To what extent do you agree or disagree with the following statements about the role of work and jobs in the green transition?

|                                                                                                                          | Being in a job that contributes to advancing the green transition is important to you personally | Your current skills allow you to contribute to the green transition | Your job is contributing to advancing the green transition |
|--------------------------------------------------------------------------------------------------------------------------|--------------------------------------------------------------------------------------------------|---------------------------------------------------------------------|------------------------------------------------------------|
| EU27                                                                                                                     | 55                                                                                               | 54                                                                  | 34                                                         |
| <b>What is the highest level of education you completed? (ONE ANSWER ONLY)</b>                                           |                                                                                                  |                                                                     |                                                            |
| Below secondary                                                                                                          | 37                                                                                               | 33                                                                  | 18                                                         |
| Secondary                                                                                                                | 54                                                                                               | 50                                                                  | 32                                                         |
| Post secondary                                                                                                           | 59                                                                                               | 61                                                                  | 38                                                         |
| University                                                                                                               | 60                                                                                               | 65                                                                  | 41                                                         |
| <b>Which of the following best describes the area where you live?</b>                                                    |                                                                                                  |                                                                     |                                                            |
| A big city                                                                                                               | 61                                                                                               | 56                                                                  | 37                                                         |
| The suburbs or outskirts of a big city                                                                                   | 54                                                                                               | 58                                                                  | 31                                                         |
| A town or a small city                                                                                                   | 55                                                                                               | 52                                                                  | 33                                                         |
| A country village                                                                                                        | 51                                                                                               | 52                                                                  | 33                                                         |
| A farm or home in the countryside                                                                                        | 56                                                                                               | 65                                                                  | 52                                                         |
| <b>What is your current occupation?</b>                                                                                  |                                                                                                  |                                                                     |                                                            |
| Responsible for ordinary shopping and looking after the home, or without any current occupation, not working             | 48                                                                                               | 42                                                                  | 25                                                         |
| Unemployed or temporarily not working                                                                                    | 57                                                                                               | 53                                                                  | 26                                                         |
| Retired or unable to work through illness                                                                                | 40                                                                                               | 44                                                                  | 18                                                         |
| Self-employed farmer                                                                                                     | 65                                                                                               | 55                                                                  | 65                                                         |
| Self-employed fisherman                                                                                                  | 85                                                                                               | 85                                                                  | 69                                                         |
| Self-employed professional (lawyer, medical practitioner, accountant, architect, etc.)                                   | 65                                                                                               | 63                                                                  | 42                                                         |
| Owner of a shop, craftsmen, other self-employed person                                                                   | 66                                                                                               | 55                                                                  | 45                                                         |
| Business proprietors, owner (full or partner) of a company                                                               | 52                                                                                               | 61                                                                  | 40                                                         |
| Employed professional (employed doctor, lawyer, accountant, architect)                                                   | 60                                                                                               | 64                                                                  | 45                                                         |
| Employed position, general management, director or top management (managing directors, director general, other director) | 64                                                                                               | 76                                                                  | 56                                                         |
| Employed position, middle management, other management (department head, junior manager, teacher, technician)            | 59                                                                                               | 67                                                                  | 46                                                         |
| Employed position, working mainly at a desk                                                                              | 64                                                                                               | 61                                                                  | 44                                                         |
| Employed position, not at a desk but travelling (salesmen, driver, etc.)                                                 | 60                                                                                               | 53                                                                  | 43                                                         |
| Employed position, not at a desk, but in a service job (hospital, restaurant, police, fireman, etc.)                     | 59                                                                                               | 60                                                                  | 39                                                         |
| Employed position, supervisor                                                                                            | 62                                                                                               | 62                                                                  | 47                                                         |
| Employed position, skilled manual worker                                                                                 | 61                                                                                               | 57                                                                  | 45                                                         |
| Other employed (unskilled) manual worker, servant                                                                        | 54                                                                                               | 43                                                                  | 30                                                         |

### 3. A shared responsibility to tackle climate change

Almost three-quarters of respondents are frightened by climate change, and more than three-quarters feel a personal responsibility to act.

Seven in ten respondents agree that climate change is something that frightens them, with 28% saying they “totally agree” with this statement.<sup>19</sup> Almost three in ten (29%) disagree, with 10% saying they “totally disagree”.

Although the majority of respondents in 24 European Union Member States agree that climate change frightens them, proportions vary from 89% in Portugal, 88% in Malta and 83% in Cyprus to 53% in Czechia. Southern European countries tend to show high levels of agreement: following Portugal and Malta; Cyprus (83%), Italy (82%) and Greece (80%) have the highest levels of agreement. In contrast, only 40% in Estonia and 49% in Finland also agree, while in the Netherlands, the opinion is divided (50% agree and 50% disagree).

In every Member State, at least one in ten “totally agree” with the statement that climate change frightens them.

QA1.3 To what extent do you agree or disagree with the following statements?  
Climate change is something that frightens you  
(% - EU27)

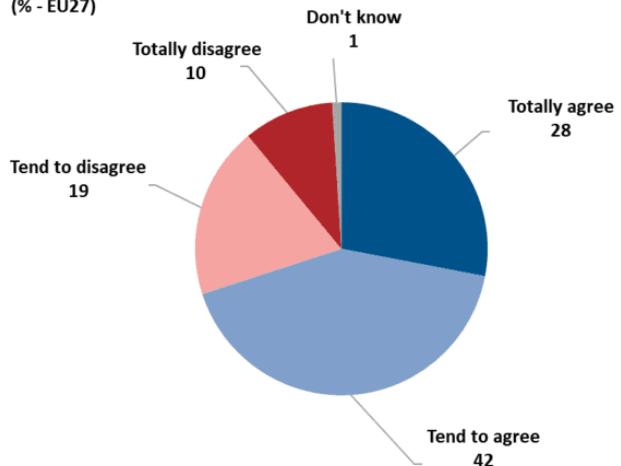

(May / Jun. 2022)

QA1.3 To what extent do you agree or disagree with the following statements?  
(% - Climate change is something that frightens you)

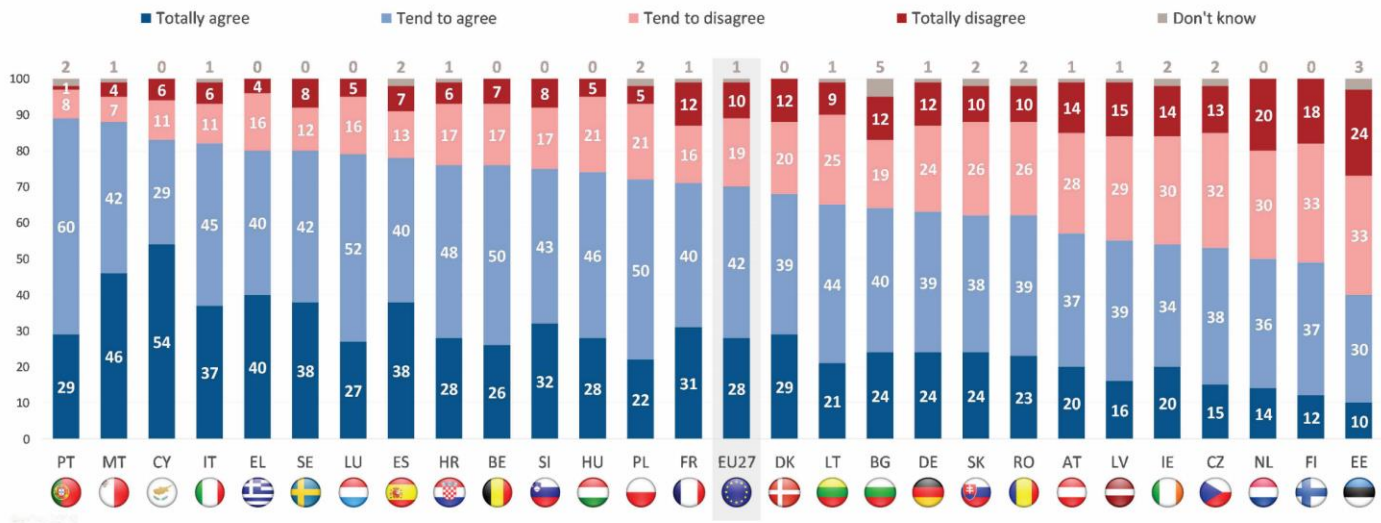

<sup>19</sup> QA1.3. To what extent do you agree or disagree with the following statements? Climate change is something that frightens you.

## Special Eurobarometer 527

### Fairness perceptions of the green transition

More than three quarters (77%) of respondents agree that they feel a personal responsibility to act to limit climate change, with 30% saying they “totally agree”.<sup>20</sup> Only one in five (21%) disagrees with this statement, with 5% saying they “totally disagree”.

The majority of respondents in each country agree that they feel a personal responsibility to act to limit climate change. Proportions range from 95% in Malta, 91% in Luxembourg and 88% in Cyprus and Sweden to 53% in Czechia, 54% in Estonia and 56% in Bulgaria.

QA1.1 To what extent do you agree or disagree with the following statements?  
You feel a personal responsibility to act to limit climate change  
(% - EU27)

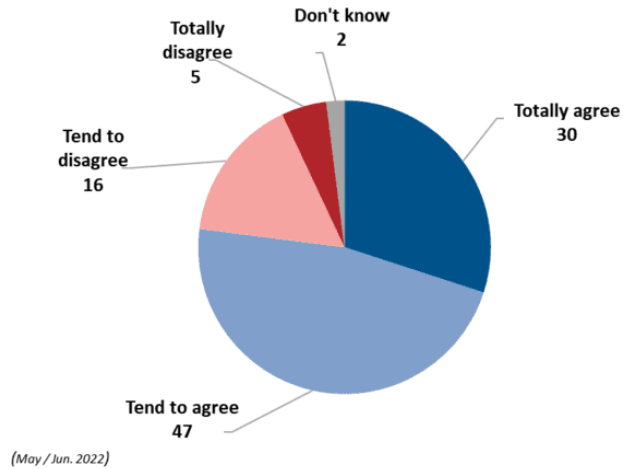

QA1.1 To what extent do you agree or disagree with the following statements?  
(% - You feel a personal responsibility to act to limit climate change)

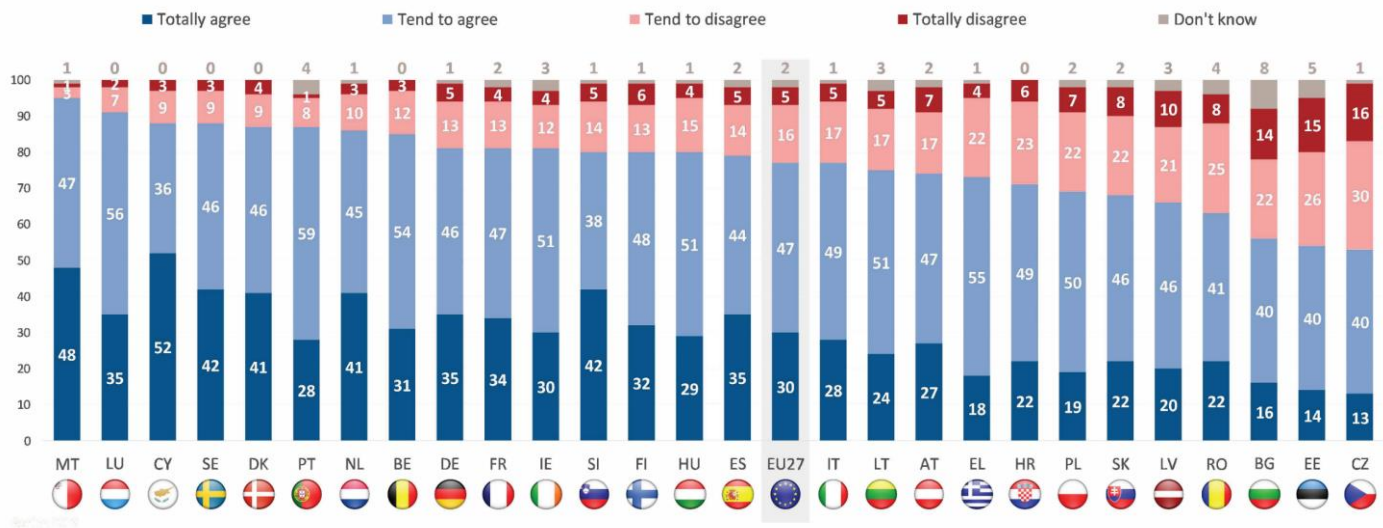

<sup>20</sup> QA1.1. To what extent do you agree or disagree with the following statements? You feel a personal responsibility to act to limit climate change.

## Special Eurobarometer 527

### Fairness perceptions of the green transition

large towns are frightened by climate change, compared to 66% living in rural villages.

The **socio-demographic analysis** at EU level illustrates a range of differences, such as the fact that women and respondents with a high level of education are more likely to be afraid of climate change.

- Women (74%) are more likely than men (66%) to say climate change frightens them.
- The younger the respondent, the more likely they are to agree that they feel a personal responsibility to act to limit climate change. For instance, 80% of 15–29-year-olds agree that they feel a personal responsibility to act, compared to 74% of those aged 55+.
- Respondents with a high level of education are more likely to say that climate change frightens them. For example, 72% with a university level of education and 73% with a post-secondary level of education say that climate change frightens them, compared to 69% of respondents with a secondary or below secondary level of education.
- The fewer difficulties a respondent experiences paying bills, the more likely they are to agree that they feel a personal responsibility to act. For example, 80% with the least financial difficulties agree that they feel a personal responsibility to act to limit climate change, compared to 68% of those who experience the most difficulties.
- The more disposable income a respondent has, the more likely they are to agree that they feel a personal responsibility to act: 83% in the 5<sup>th</sup> quintile feel this way, compared to 71% in the first quintile.
- The more urbanised a respondent's environment, the more likely they are to agree that they feel a personal responsibility to act to limit climate change or that climate change is frightening to them. For instance, 73% living in

**Special Eurobarometer 527**  
**Fairness perceptions of the green transition**

**QA1** To what extent do you agree or disagree with the following statements?  
(% - Total 'Agree')

|                                                                                                                     | You feel a personal responsibility to act to limit climate change | Climate change is something that frightens you |
|---------------------------------------------------------------------------------------------------------------------|-------------------------------------------------------------------|------------------------------------------------|
| EU27                                                                                                                | 77                                                                | 70                                             |
|  <b>Gender</b>                     |                                                                   |                                                |
| Man                                                                                                                 | 76                                                                | 66                                             |
| Woman                                                                                                               | 79                                                                | 74                                             |
|  <b>Age</b>                        |                                                                   |                                                |
| 15-24                                                                                                               | 80                                                                | 71                                             |
| 25-39                                                                                                               | 80                                                                | 71                                             |
| 40-54                                                                                                               | 79                                                                | 72                                             |
| 55 +                                                                                                                | 74                                                                | 69                                             |
|  <b>Difficulties paying bills</b> |                                                                   |                                                |
| Most of the time                                                                                                    | 68                                                                | 74                                             |
| From time to time                                                                                                   | 75                                                                | 72                                             |
| Almost never/ Never                                                                                                 | 80                                                                | 69                                             |
| <b>Image of the EU</b>                                                                                              |                                                                   |                                                |
| Total 'Positive'                                                                                                    | 85                                                                | 74                                             |
| Neutral                                                                                                             | 75                                                                | 70                                             |
| Total 'Negative'                                                                                                    | 63                                                                | 58                                             |
| <b>Total disposable income - quintile</b>                                                                           |                                                                   |                                                |
| 1st quintile                                                                                                        | 71                                                                | 67                                             |
| 2nd quintile                                                                                                        | 75                                                                | 71                                             |
| 3rd quintile                                                                                                        | 79                                                                | 70                                             |
| 4th quintile                                                                                                        | 81                                                                | 71                                             |
| 5th quintile                                                                                                        | 83                                                                | 69                                             |
| <b>Employment status</b>                                                                                            |                                                                   |                                                |
| Employed on an open ended contract                                                                                  | 81                                                                | 72                                             |
| Employed on a short-term contract                                                                                   | 78                                                                | 72                                             |
| Employed with a temporary work agency / an online platform                                                          | 75                                                                | 70                                             |
| Self-employed without employees                                                                                     | 80                                                                | 70                                             |
| Self-employed with employees                                                                                        | 76                                                                | 67                                             |
| Unemployed                                                                                                          | 74                                                                | 67                                             |
| Retired                                                                                                             | 72                                                                | 67                                             |
| Looking after home, inactive                                                                                        | 69                                                                | 69                                             |
| Student                                                                                                             | 83                                                                | 73                                             |
| Other                                                                                                               | 75                                                                | 53                                             |
| <b>What is the highest level of education you completed? (ONE ANSWER ONLY)</b>                                      |                                                                   |                                                |
| Below secondary                                                                                                     | 61                                                                | 69                                             |
| Secondary                                                                                                           | 75                                                                | 69                                             |
| Post secondary                                                                                                      | 83                                                                | 73                                             |
| University                                                                                                          | 85                                                                | 72                                             |
| <b>Which of the following best describes the area where you live?</b>                                               |                                                                   |                                                |
| A big city                                                                                                          | 81                                                                | 73                                             |
| The suburbs or outskirts of a big city                                                                              | 77                                                                | 70                                             |
| A town or a small city                                                                                              | 77                                                                | 71                                             |
| A country village                                                                                                   | 73                                                                | 66                                             |
| A farm or home in the countryside                                                                                   | 81                                                                | 60                                             |



## Special Eurobarometer 527

### Fairness perceptions of the green transition

More than three-quarters of respondents agree that they should personally do more to contribute to the green transition and tackling climate change.

More than seven in ten (72%) respondents think that they should personally do more than they currently do to contribute to the green transition and tackling climate change (by consuming less or saving energy, for example), regardless of what others do, with 22% saying they strongly agree with this statement.<sup>21</sup> One quarter (25%) disagrees, with 6% saying they strongly disagree. Fewer than one in twenty (3%) say they don't know.

The majority in each country think that they should personally do more to contribute to the green transition and tackle climate change, although proportions range from 91% in Malta, 89% in Cyprus and 84% in Croatia to 56% in Estonia, 62% in Czechia and 63% in Bulgaria.

At least one-third in Malta (51%), Cyprus (43%), Spain (36%) and Sweden (35%) say they "totally agree" that they should be doing more.

QA3.1 To what extent do you agree or disagree with the following statements about the green transition and the fight against climate change?  
You should personally do more than you currently do to contribute to the green transition and tackling climate change (by consuming less or saving energy for example), regardless of what others do.  
(% - EU27)

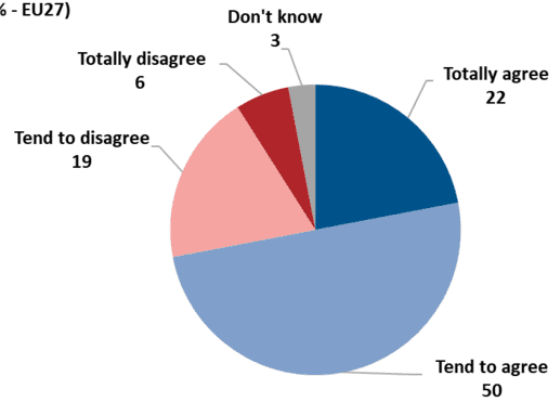

(May / Jun. 2022)

QA3.1 To what extent do you agree or disagree with the following statements about the green transition and the fight against climate change?  
(% - You should personally do more than you currently do to contribute to the green transition and tackling climate change (by consuming less or saving energy for example), regardless of what others do.)

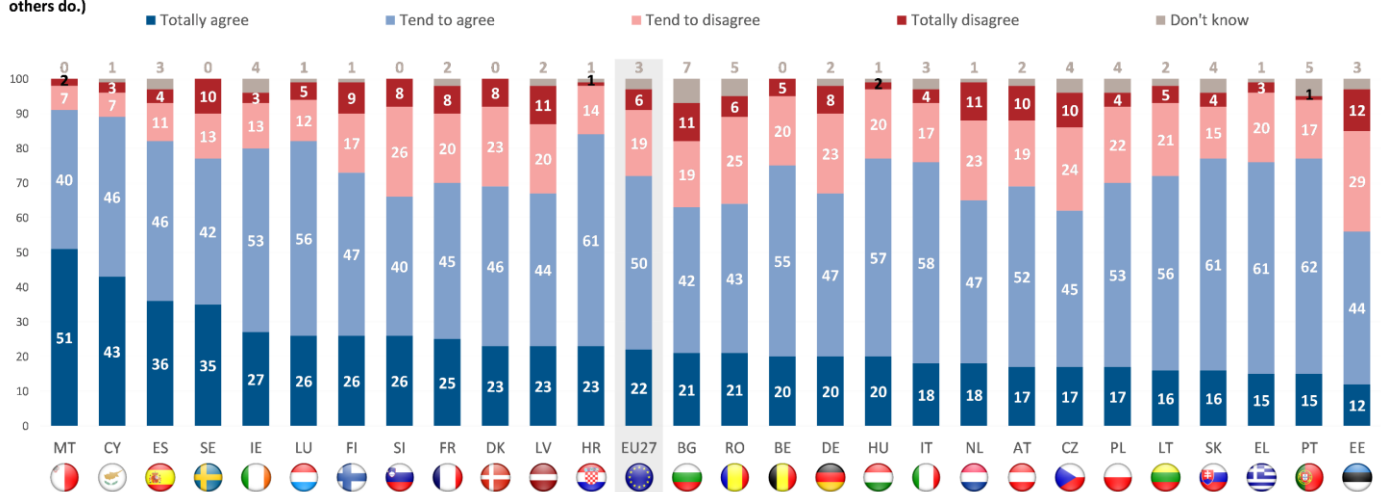

<sup>21</sup> QA3. To what extent do you agree or disagree with the following statements about the green transition and the fight against climate change? 3.1 You should personally do more than you currently do to contribute to the green transition and tackling climate change (by consuming less or saving energy for example), regardless of what others do.

3.2 You do not need to take action personally to fight climate change if other people in (OUR COUNTRY) take no action either. 3.3 (OUR COUNTRY) does not need to take action to fight climate and environmental changes if other countries take no action either.

## Special Eurobarometer 527

### Fairness perceptions of the green transition

The **socio-demographic analysis** at EU level highlights that, for example, among respondents, young people, those with a high level of education, those with fewer financial difficulties, and those living in large towns are more likely to agree with the statement that that they should personally do more to contribute to the green transition and tackle climate change regardless of what others do.

- The younger the respondent, the more likely they are to agree that they should personally do more to contribute to the green transition and tackle climate change, with the largest difference seen between 15–54-year-olds and those aged 55+ (66%).
- Respondents with a post-secondary (78%) or university degree (76%) are more likely to agree that they should personally do more than what they currently do to contribute to the green transition and tackle climate change than respondents with a secondary (70%) or below secondary (59%) level of education.
- Respondents with fewer financial difficulties (73%) are more likely to agree than those who have difficulties paying bills most of the time (65%).
- The more disposable income a respondent has, the more likely they are to agree: 78% in the 4<sup>th</sup> and 5<sup>th</sup> quintiles agree compared to 65% in the 1<sup>st</sup> quintile.
- Employed (76%–78%) are more likely to agree than other employment groups, particularly retired persons (63%).
- Respondents living in large towns (76%) are more likely to agree than those in small or mid-sized towns (72%) or rural villages (68%).
- Respondents who have a positive view of the EU (79%) are more likely to agree than those with a negative view (57%).

## Special Eurobarometer 527

### Fairness perceptions of the green transition

**QA3.1** To what extent do you agree or disagree with the following statements about the green transition and the fight against climate change?

**You should personally do more than you currently do to contribute to the green transition and tackling climate change (by consuming less or saving energy for example), regardless of what others do.**

(% - EU)

|                                                                                                                    | Totally agree | Tend to agree | Tend to disagree | Totally disagree | Total 'Agree' | Total 'Disagree' | Don't know |
|--------------------------------------------------------------------------------------------------------------------|---------------|---------------|------------------|------------------|---------------|------------------|------------|
| EU27                                                                                                               | 22            | 50            | 19               | 6                | 72            | 25               | 3          |
|  <b>Gender</b>                    |               |               |                  |                  |               |                  |            |
| Man                                                                                                                | 21            | 50            | 20               | 7                | 71            | 27               | 2          |
| Woman                                                                                                              | 23            | 50            | 19               | 5                | 73            | 24               | 3          |
|  <b>Age</b>                       |               |               |                  |                  |               |                  |            |
| 15-24                                                                                                              | 30            | 51            | 12               | 4                | 81            | 16               | 3          |
| 25-39                                                                                                              | 25            | 51            | 18               | 5                | 76            | 23               | 1          |
| 40-54                                                                                                              | 23            | 51            | 18               | 6                | 74            | 24               | 2          |
| 55 +                                                                                                               | 18            | 48            | 23               | 8                | 66            | 31               | 3          |
|  <b>Difficulties paying bills</b> |               |               |                  |                  |               |                  |            |
| Most of the time                                                                                                   | 20            | 45            | 21               | 10               | 65            | 31               | 4          |
| From time to time                                                                                                  | 21            | 51            | 21               | 5                | 72            | 26               | 2          |
| Almost never/ Never                                                                                                | 23            | 50            | 19               | 6                | 73            | 25               | 2          |
| <b>Image of the EU</b>                                                                                             |               |               |                  |                  |               |                  |            |
| Total 'Positive'                                                                                                   | 26            | 53            | 15               | 4                | 79            | 19               | 2          |
| Neutral                                                                                                            | 20            | 49            | 22               | 6                | 69            | 28               | 3          |
| Total 'Negative'                                                                                                   | 16            | 41            | 26               | 15               | 57            | 41               | 2          |
| <b>Total disposable income - quintile</b>                                                                          |               |               |                  |                  |               |                  |            |
| 1st quintile                                                                                                       | 21            | 44            | 22               | 9                | 65            | 31               | 4          |
| 2nd quintile                                                                                                       | 20            | 48            | 23               | 7                | 68            | 30               | 2          |
| 3rd quintile                                                                                                       | 22            | 51            | 19               | 6                | 73            | 25               | 2          |
| 4th quintile                                                                                                       | 23            | 55            | 16               | 5                | 78            | 21               | 1          |
| 5th quintile                                                                                                       | 27            | 51            | 16               | 5                | 78            | 21               | 1          |
| <b>Employment status</b>                                                                                           |               |               |                  |                  |               |                  |            |
| Employed on an open ended contract                                                                                 | 23            | 53            | 18               | 5                | 76            | 23               | 1          |
| Employed on a short-term contract                                                                                  | 23            | 53            | 19               | 4                | 76            | 23               | 1          |
| Employed with a temporary work agency / an online platform                                                         | 29            | 49            | 14               | 7                | 78            | 21               | 1          |
| Self-employed without employees                                                                                    | 24            | 48            | 19               | 7                | 72            | 26               | 2          |
| Self-employed with employees                                                                                       | 24            | 47            | 15               | 11               | 71            | 26               | 3          |
| Unemployed                                                                                                         | 27            | 45            | 18               | 8                | 72            | 26               | 2          |
| Retired                                                                                                            | 17            | 46            | 24               | 9                | 63            | 33               | 4          |
| Looking after home, inactive                                                                                       | 18            | 50            | 21               | 8                | 68            | 29               | 3          |
| Student                                                                                                            | 31            | 51            | 11               | 4                | 82            | 15               | 3          |
| Other                                                                                                              | 15            | 44            | 23               | 8                | 59            | 31               | 10         |
| <b>What is the highest level of education you completed? (ONE ANSWER ONLY)</b>                                     |               |               |                  |                  |               |                  |            |
| Below secondary                                                                                                    | 13            | 46            | 26               | 7                | 59            | 33               | 8          |
| Secondary                                                                                                          | 20            | 50            | 21               | 6                | 70            | 27               | 3          |
| Post secondary                                                                                                     | 28            | 50            | 14               | 7                | 78            | 21               | 1          |
| University                                                                                                         | 27            | 49            | 16               | 7                | 76            | 23               | 1          |
| <b>Which of the following best describes the area where you live?</b>                                              |               |               |                  |                  |               |                  |            |
| A big city                                                                                                         | 26            | 50            | 16               | 6                | 76            | 22               | 2          |
| The suburbs or outskirts of a big city                                                                             | 24            | 49            | 19               | 7                | 73            | 26               | 1          |
| A town or a small city                                                                                             | 22            | 50            | 20               | 6                | 72            | 26               | 2          |
| A country village                                                                                                  | 19            | 49            | 22               | 7                | 68            | 29               | 3          |
| A farm or home in the countryside                                                                                  | 22            | 51            | 13               | 12               | 73            | 25               | 2          |

## Special Eurobarometer 527

### Fairness perceptions of the green transition

About a quarter (27%) of respondents agree that they do not need to take action personally to fight climate change if other people in their country do not take action either, with 9% saying they totally agree. However, the majority (71%) disagrees with this statement, with 38% totally disagreeing.

Romania (48% agree vs 47% disagree) is the only country where a majority agrees that they do not need to take action personally to fight climate change if other people in their country take no action – in fact, 21% “totally agree” with this statement. In the remaining Member States, only a minority agree, although proportions range from 42% in Poland, 37% in Bulgaria and 35% in Austria to 11% in the Netherlands, 14% in Denmark and 16% in Sweden and Greece.

QA3.2 To what extent do you agree or disagree with the following statements about the green transition and the fight against climate change?  
You do not need to take action personally to fight climate change if other people in (OUR COUNTRY) take no action either  
(% - EU27)

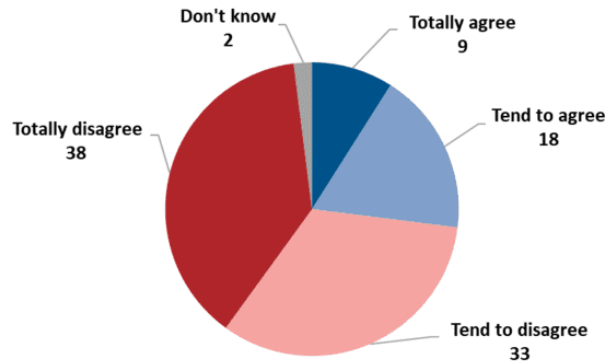

(May/Jun. 2022)

QA3.2 To what extent do you agree or disagree with the following statements about the green transition and the fight against climate change?  
(% - You do not need to take action personally to fight climate change if other people in (OUR COUNTRY) take no action either)

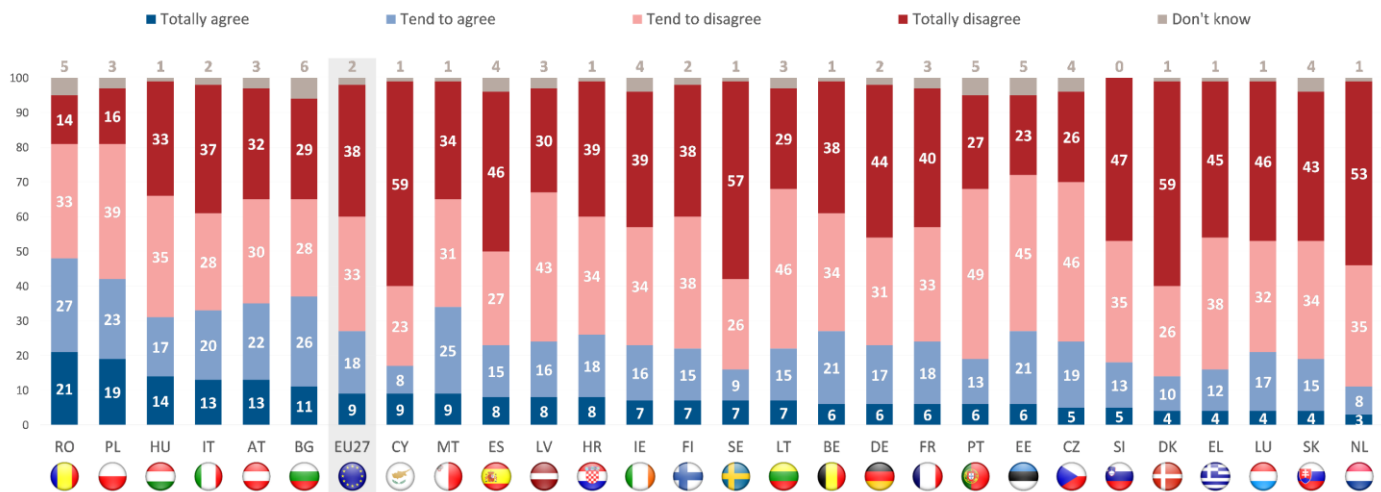

## Special Eurobarometer 527

### Fairness perceptions of the green transition

The **socio-demographic analysis at EU level** illustrates several differences among respondents. For example, respondents with lower education levels, those experiencing difficulties paying their bills, those with lower disposable income, or those living in rural villages are more likely to agree that they should not take action personally to fight climate change if other people in their country take no action either.

- Respondents with a higher level of education, such as post-secondary (23%) or university (20%), are less likely to agree that they should not take action personally to fight climate change if other people in their country take no action either, than respondents with a lower level of education, either secondary (30%) or below secondary (35%).
- Those who experience difficulties paying bills from time to time or most often (31%) are more likely to agree than those who rarely or never have these difficulties (25%).
- The less disposable income a respondent has, the more likely they are to agree: 30% in the 1<sup>st</sup> quintile do so, compared to 21% in the 5<sup>th</sup> quintile.
- Respondents employed with a temporary work agency / an online platform (45%) are much more likely to agree than those in other occupation groups.
- The less urbanised a respondent's environment, the more likely they are to agree: 31% living in rural villages do so compared to 25% living in large towns.
- Those with a negative image of the EU are more likely to agree (36%) than those with a positive image (22%).



**Special Eurobarometer 527**  
**Fairness perceptions of the green transition**

**QA3.2** To what extent do you agree or disagree with the following statements about the green transition and the fight against climate change?

**You do not need to take action personally to fight climate change if other people in (OUR COUNTRY) take no action either**

(% - EU)

|                                                                                                                    | Totally agree | Tend to agree | Tend to disagree | Totally disagree | Total 'Agree' | Total 'Disagree' | Don't know |
|--------------------------------------------------------------------------------------------------------------------|---------------|---------------|------------------|------------------|---------------|------------------|------------|
| EU27                                                                                                               | 9             | 18            | 33               | 38               | 27            | 71               | 2          |
|  <b>Gender</b>                    |               |               |                  |                  |               |                  |            |
| Man                                                                                                                | 10            | 19            | 33               | 36               | 29            | 69               | 2          |
| Woman                                                                                                              | 8             | 17            | 32               | 40               | 25            | 72               | 3          |
|  <b>Age</b>                       |               |               |                  |                  |               |                  |            |
| 15-24                                                                                                              | 9             | 13            | 30               | 45               | 22            | 75               | 3          |
| 25-39                                                                                                              | 10            | 17            | 32               | 40               | 27            | 72               | 1          |
| 40-54                                                                                                              | 9             | 18            | 33               | 39               | 27            | 72               | 1          |
| 55 +                                                                                                               | 9             | 19            | 33               | 35               | 28            | 68               | 4          |
|  <b>Difficulties paying bills</b> |               |               |                  |                  |               |                  |            |
| Most of the time                                                                                                   | 11            | 20            | 33               | 33               | 31            | 66               | 3          |
| From time to time                                                                                                  | 11            | 20            | 34               | 32               | 31            | 66               | 3          |
| Almost never/ Never                                                                                                | 8             | 17            | 32               | 41               | 25            | 73               | 2          |
| <b>Image of the EU</b>                                                                                             |               |               |                  |                  |               |                  |            |
| Total 'Positive'                                                                                                   | 7             | 15            | 32               | 44               | 22            | 76               | 2          |
| Neutral                                                                                                            | 10            | 20            | 34               | 33               | 30            | 67               | 3          |
| Total 'Negative'                                                                                                   | 14            | 22            | 32               | 30               | 36            | 62               | 2          |
| <b>Total disposable income - quintile</b>                                                                          |               |               |                  |                  |               |                  |            |
| 1st quintile                                                                                                       | 10            | 20            | 32               | 35               | 30            | 67               | 3          |
| 2nd quintile                                                                                                       | 8             | 20            | 34               | 35               | 28            | 69               | 3          |
| 3rd quintile                                                                                                       | 9             | 18            | 34               | 37               | 27            | 71               | 2          |
| 4th quintile                                                                                                       | 9             | 15            | 33               | 42               | 24            | 75               | 1          |
| 5th quintile                                                                                                       | 7             | 14            | 32               | 46               | 21            | 78               | 1          |
| <b>Employment status</b>                                                                                           |               |               |                  |                  |               |                  |            |
| Employed on an open ended contract                                                                                 | 9             | 17            | 33               | 39               | 26            | 72               | 2          |
| Employed on a short-term contract                                                                                  | 7             | 20            | 31               | 40               | 27            | 71               | 2          |
| Employed with a temporary work agency / an online platform                                                         | 18            | 27            | 25               | 29               | 45            | 54               | 1          |
| Self-employed without employees                                                                                    | 10            | 15            | 29               | 43               | 25            | 72               | 3          |
| Self-employed with employees                                                                                       | 14            | 17            | 32               | 35               | 31            | 67               | 2          |
| Unemployed                                                                                                         | 12            | 18            | 30               | 38               | 30            | 68               | 2          |
| Retired                                                                                                            | 10            | 20            | 33               | 33               | 30            | 66               | 4          |
| Looking after home, inactive                                                                                       | 8             | 18            | 39               | 31               | 26            | 70               | 4          |
| Student                                                                                                            | 6             | 11            | 30               | 50               | 17            | 80               | 3          |
| Other                                                                                                              | 5             | 12            | 31               | 46               | 17            | 77               | 6          |
| <b>What is the highest level of education you completed? (ONE ANSWER ONLY)</b>                                     |               |               |                  |                  |               |                  |            |
| Below secondary                                                                                                    | 7             | 28            | 31               | 26               | 35            | 57               | 8          |
| Secondary                                                                                                          | 11            | 19            | 35               | 32               | 30            | 67               | 3          |
| Post secondary                                                                                                     | 8             | 15            | 30               | 45               | 23            | 75               | 2          |
| University                                                                                                         | 7             | 13            | 28               | 51               | 20            | 79               | 1          |
| <b>Which of the following best describes the area where you live?</b>                                              |               |               |                  |                  |               |                  |            |
| A big city                                                                                                         | 10            | 15            | 31               | 42               | 25            | 73               | 2          |
| The suburbs or outskirts of a big city                                                                             | 7             | 15            | 30               | 46               | 22            | 76               | 2          |
| A town or a small city                                                                                             | 9             | 18            | 33               | 38               | 27            | 71               | 2          |
| A country village                                                                                                  | 10            | 21            | 35               | 31               | 31            | 66               | 3          |
| A farm or home in the countryside                                                                                  | 12            | 22            | 29               | 34               | 34            | 63               | 3          |

## Special Eurobarometer 527

### Fairness perceptions of the green transition

One-quarter of respondents (25%) agree that their country does not need to take action to fight climate and environmental changes if other countries take no action either, with 8% totally agreeing. However, the majority (72%) disagrees, with almost half (45%) saying they “totally disagree” with this statement.

Only a minority in each country agrees that their country does not need to take action to fight climate and environmental changes if other countries take no action, with proportions ranging from 42% in Romania, 41% in Poland and 35% in Austria to 13% in Greece, 15% in Denmark and 16% in Cyprus, the Netherlands, Portugal and Slovenia.

There are five countries where at least one in ten “totally agree” with this statement: Austria (17%), Poland (15%), Finland (13%), Romania (12%) and Bulgaria (10%).

QA3.3 To what extent do you agree or disagree with the following statements about the green transition and the fight against climate change?  
(OUR COUNTRY) does not need to take action to fight climate and environmental changes if other countries take no action either.  
(% - EU27)

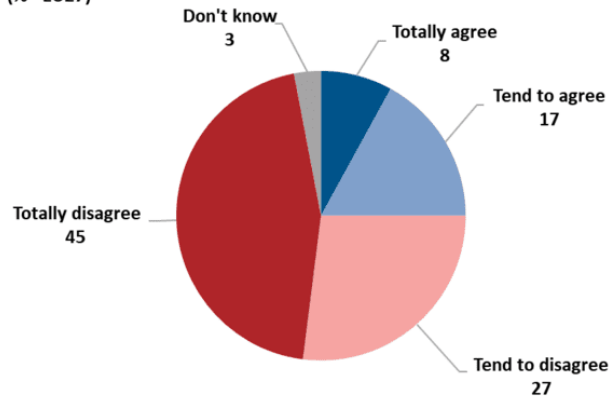

(May / Jun. 2022)

QA3.3 To what extent do you agree or disagree with the following statements about the green transition and the fight against climate change?  
(% - (OUR COUNTRY) does not need to take action to fight climate and environmental changes if other countries take no action either.)

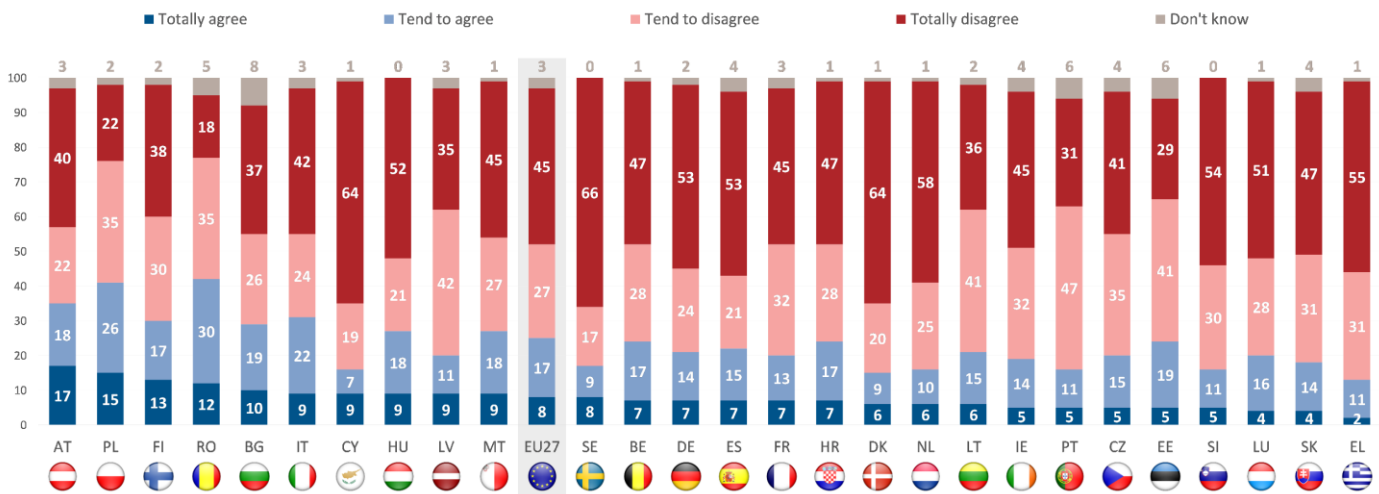

## Special Eurobarometer 527

### Fairness perceptions of the green transition

The **socio-demographic analysis** at EU level highlights several differences among respondents. The most striking difference is between respondents with a positive and negative view of the EU. In addition, there are also differences based on education level, financial difficulties, employment and urbanization.

- Respondents with a lower level of education, either below secondary or secondary (both 27%) are more likely to agree that their country does not need to take action to fight climate change and environmental changes if other countries take no action, compared to those with a higher level of education, either post-secondary (23%) or university (19%).
- Those who experience difficulties paying bills from time to time (31%) are the most likely to agree, particularly compared to those who rarely or never have these difficulties (23%).
- Respondents employed with a temporary work agency / an online platform (45%) are much more likely to agree than those with other employment statuses.
- Respondents in urbanized areas, such as big cities (23%) or suburbs (21%), are less likely to agree than respondents living in rural areas, such as country villages (28%) or farms or homes in the countryside (33%).
- Respondents with a negative view of the EU are more likely (34%) to agree than those with a positive view (20%).

## Special Eurobarometer 527

### Fairness perceptions of the green transition

**QA3.3** To what extent do you agree or disagree with the following statements about the green transition and the fight against climate change?

**(OUR COUNTRY) does not need to take action to fight climate and environmental changes if other countries take no action either.**

(% - EU)

|                                                                                                                    | Totally agree | Tend to agree | Tend to disagree | Totally disagree | Total 'Agree' | Total 'Disagree' | Don't know |
|--------------------------------------------------------------------------------------------------------------------|---------------|---------------|------------------|------------------|---------------|------------------|------------|
| EU27                                                                                                               | 8             | 17            | 27               | 45               | 25            | 72               | 3          |
|  <b>Gender</b>                    |               |               |                  |                  |               |                  |            |
| Man                                                                                                                | 9             | 18            | 28               | 43               | 27            | 71               | 2          |
| Woman                                                                                                              | 8             | 16            | 27               | 46               | 24            | 73               | 3          |
|  <b>Age</b>                       |               |               |                  |                  |               |                  |            |
| 15-24                                                                                                              | 7             | 13            | 24               | 53               | 20            | 77               | 3          |
| 25-39                                                                                                              | 9             | 17            | 26               | 47               | 26            | 73               | 1          |
| 40-54                                                                                                              | 9             | 17            | 27               | 45               | 26            | 72               | 2          |
| 55 +                                                                                                               | 8             | 18            | 29               | 41               | 26            | 70               | 4          |
|  <b>Difficulties paying bills</b> |               |               |                  |                  |               |                  |            |
| Most of the time                                                                                                   | 11            | 15            | 30               | 40               | 26            | 70               | 4          |
| From time to time                                                                                                  | 10            | 21            | 28               | 38               | 31            | 66               | 3          |
| Almost never/ Never                                                                                                | 8             | 15            | 27               | 48               | 23            | 75               | 2          |
| <b>Subjective urbanisation</b>                                                                                     |               |               |                  |                  |               |                  |            |
| Rural village                                                                                                      | 9             | 19            | 31               | 37               | 28            | 68               | 4          |
| Small/ mid size town                                                                                               | 8             | 17            | 28               | 44               | 25            | 72               | 3          |
| Large town                                                                                                         | 8             | 15            | 24               | 51               | 23            | 75               | 2          |
| <b>Image of the EU</b>                                                                                             |               |               |                  |                  |               |                  |            |
| Total 'Positive'                                                                                                   | 6             | 14            | 26               | 52               | 20            | 78               | 2          |
| Neutral                                                                                                            | 9             | 19            | 30               | 39               | 28            | 69               | 3          |
| Total 'Negative'                                                                                                   | 14            | 20            | 27               | 36               | 34            | 63               | 3          |
| <b>Total disposable income - quintile</b>                                                                          |               |               |                  |                  |               |                  |            |
| 1st quintile                                                                                                       | 9             | 16            | 29               | 42               | 25            | 71               | 4          |
| 2nd quintile                                                                                                       | 8             | 19            | 29               | 42               | 27            | 71               | 2          |
| 3rd quintile                                                                                                       | 8             | 17            | 29               | 44               | 25            | 73               | 2          |
| 4th quintile                                                                                                       | 8             | 15            | 27               | 49               | 23            | 76               | 1          |
| 5th quintile                                                                                                       | 7             | 14            | 24               | 54               | 21            | 78               | 1          |
| <b>Employment status</b>                                                                                           |               |               |                  |                  |               |                  |            |
| Employed on an open ended contract                                                                                 | 8             | 18            | 27               | 46               | 26            | 73               | 1          |
| Employed on a short-term contract                                                                                  | 9             | 16            | 27               | 46               | 25            | 73               | 2          |
| Employed with a temporary work agency / an online platform                                                         | 16            | 29            | 23               | 30               | 45            | 53               | 2          |
| Self-employed without employees                                                                                    | 9             | 13            | 24               | 51               | 22            | 75               | 3          |
| Self-employed with employees                                                                                       | 13            | 15            | 32               | 38               | 28            | 70               | 2          |
| Unemployed                                                                                                         | 13            | 15            | 26               | 43               | 28            | 69               | 3          |
| Retired                                                                                                            | 9             | 17            | 30               | 40               | 26            | 70               | 4          |
| Looking after home, inactive                                                                                       | 7             | 18            | 33               | 37               | 25            | 70               | 5          |
| Student                                                                                                            | 5             | 12            | 23               | 57               | 17            | 80               | 3          |
| Other                                                                                                              | 13            | 8             | 12               | 57               | 21            | 69               | 10         |
| <b>What is the highest level of education you completed? (ONE ANSWER ONLY)</b>                                     |               |               |                  |                  |               |                  |            |
| Below secondary                                                                                                    | 7             | 20            | 32               | 31               | 27            | 63               | 10         |
| Secondary                                                                                                          | 9             | 18            | 30               | 40               | 27            | 70               | 3          |
| Post secondary                                                                                                     | 8             | 15            | 24               | 51               | 23            | 75               | 2          |
| University                                                                                                         | 6             | 13            | 22               | 58               | 19            | 80               | 1          |
| <b>Which of the following best describes the area where you live?</b>                                              |               |               |                  |                  |               |                  |            |
| A big city                                                                                                         | 8             | 15            | 24               | 51               | 23            | 75               | 2          |
| The suburbs or outskirts of a big city                                                                             | 6             | 15            | 23               | 54               | 21            | 77               | 2          |
| A town or a small city                                                                                             | 8             | 17            | 28               | 44               | 25            | 72               | 3          |
| A country village                                                                                                  | 9             | 19            | 31               | 37               | 28            | 68               | 4          |
| A farm or home in the countryside                                                                                  | 10            | 23            | 26               | 39               | 33            | 65               | 2          |

## II. REDUCING ENERGY USE IN A FAIR WAY

III.

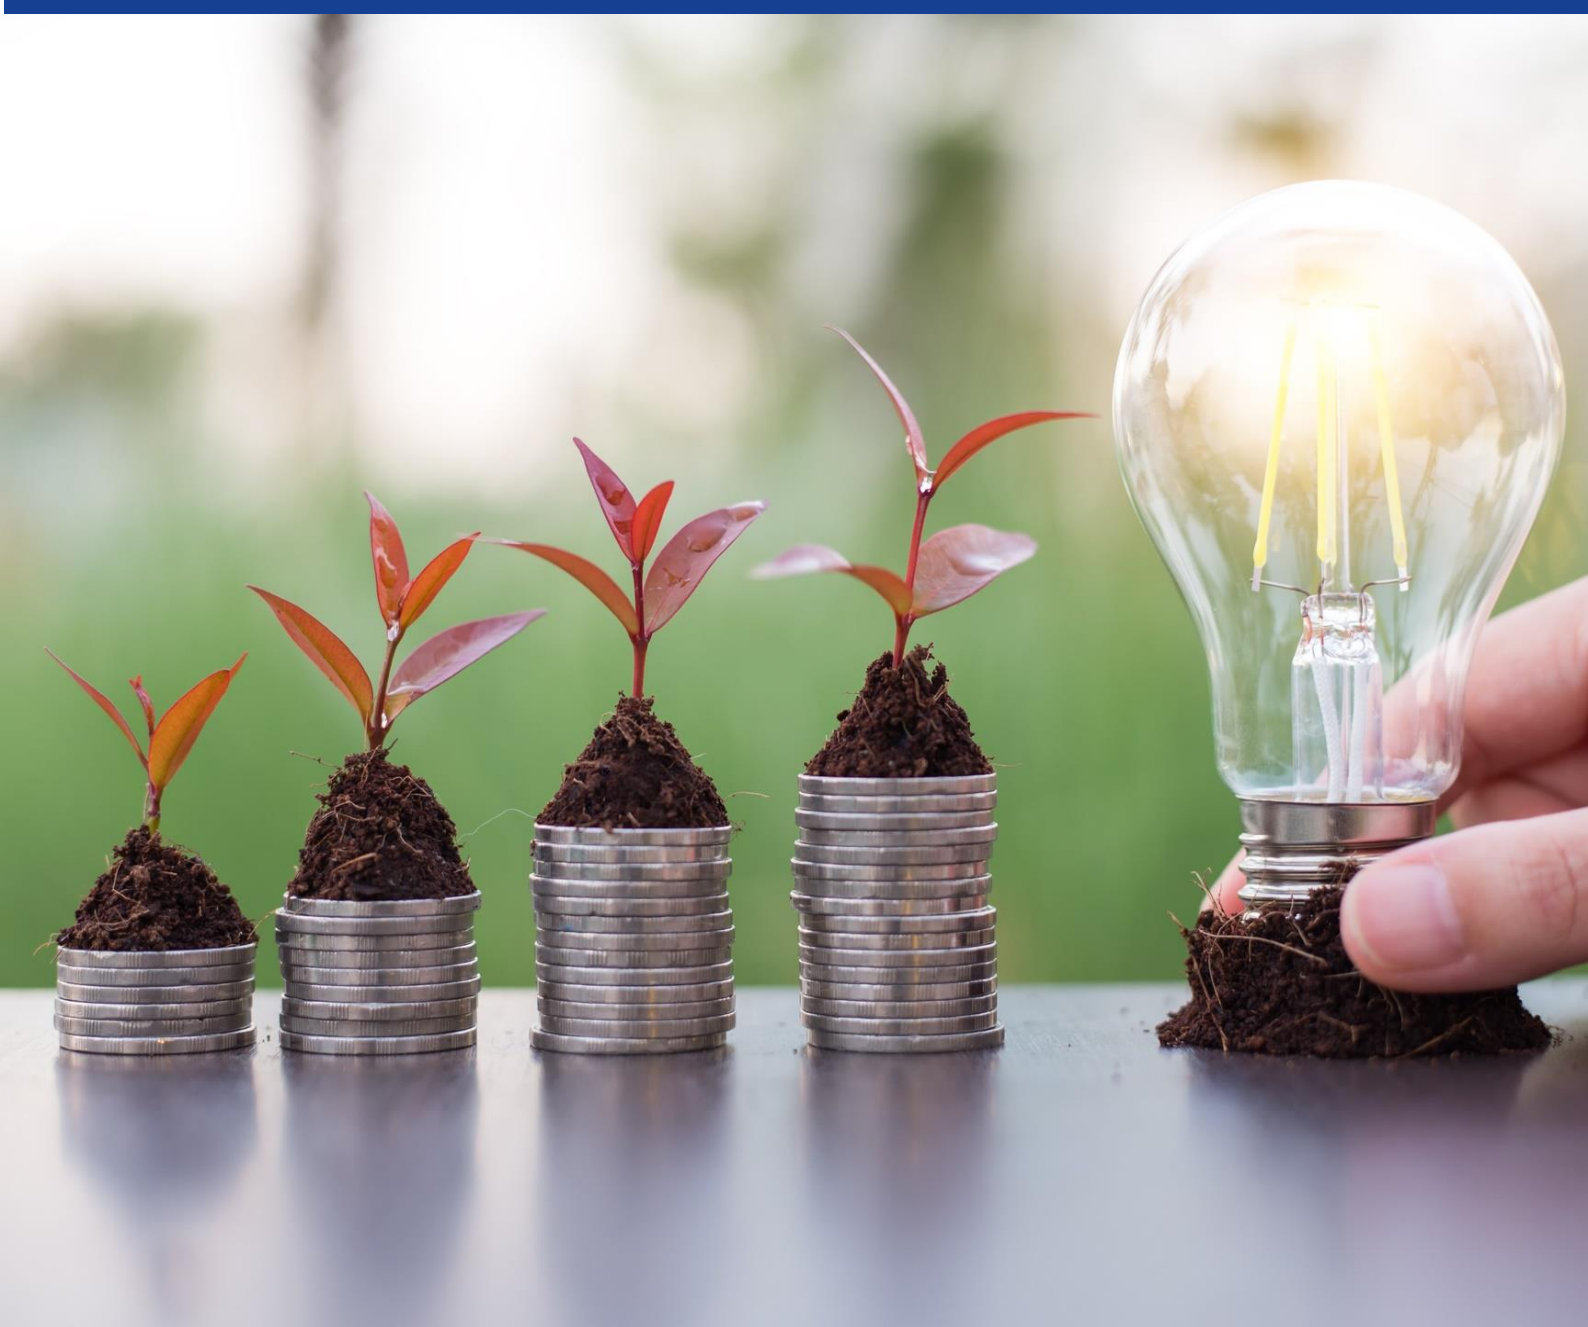



**Special Eurobarometer 527**  
**Fairness perceptions of the green transition**

**Energy prices are a serious problem for most people. In some Member States, all respondents think this way.**

More than nine in ten (93%) respondents in the EU think the level of energy prices for people in their country is a serious problem. In fact, the majority (58%) thinks this is a “very serious problem”.<sup>22</sup>

Eight in ten (80%) say the current cost of fuel for their transport needs is a problem, and for 47%, it is a serious one. Almost as many (79%) say the current cost of their household’s energy needs is a problem, with 44% describing it as a “very serious problem”.

**QA17. In your opinion, how serious a problem is each of the following aspects?**  
 (% - EU)

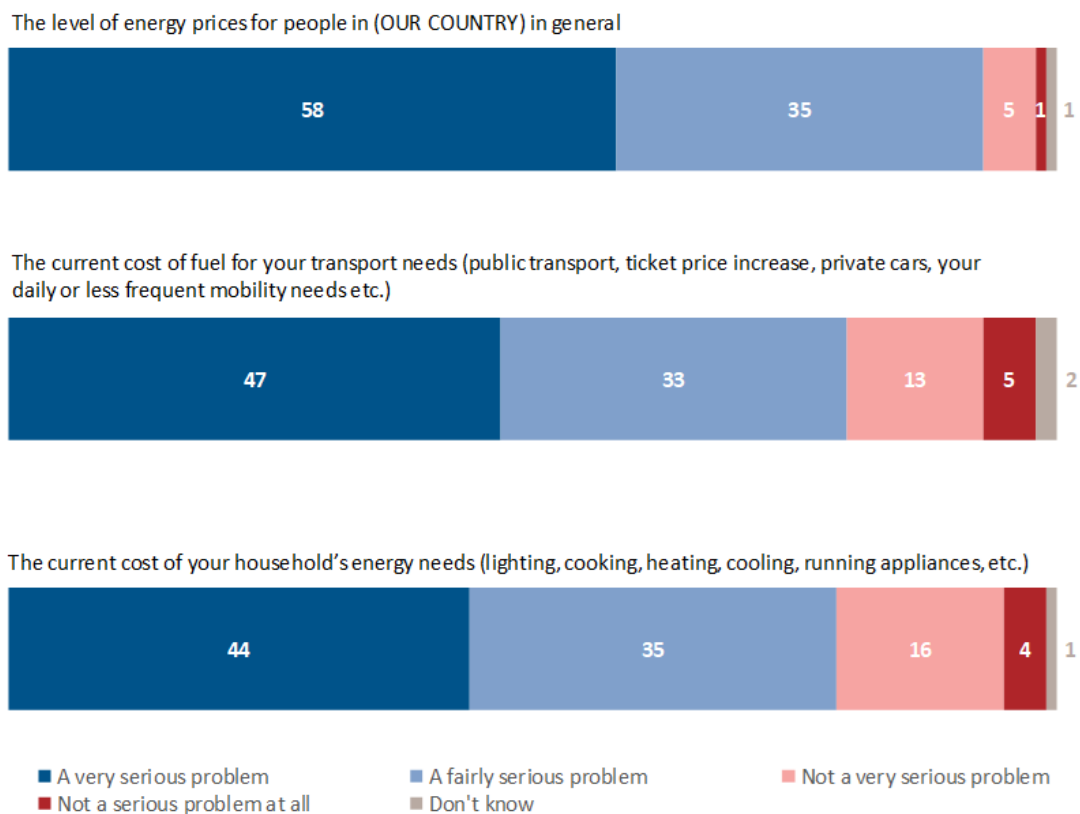

<sup>22</sup> QA17 In your opinion, how serious a problem is each of the following aspects? 17.1 The level of energy prices for people in (OUR COUNTRY) in general. 17.2 The current cost of your household’s energy needs (lighting, cooking, heating, cooling, running appliances, etc.).

17.3 The current cost of fuel for your transport needs (public transport, ticket price increase, private cars, your daily or less frequent mobility needs etc.).

## Special Eurobarometer 527

### Fairness perceptions of the green transition

At a national level, more than three-quarters of respondents in each Member State say that the level of energy prices in their country is a serious problem for people in general. All respondents in Greece (100%) think this way, as do 99% in Spain, Cyprus and Portugal and 98% in Ireland, compared to 76% in Malta, 82% in Sweden and 83% in Finland.

In 19 countries, at least half of all respondents think energy prices in their country are a "very serious problem", with the highest proportions seen in Greece (89%), Cyprus (83%) and Ireland (79%), compared to 30% in Hungary.

**QA17.1 In your opinion, how serious a problem is each of the following aspects?**  
The level of energy prices for people in (OUR COUNTRY) in general  
(% - EU27)

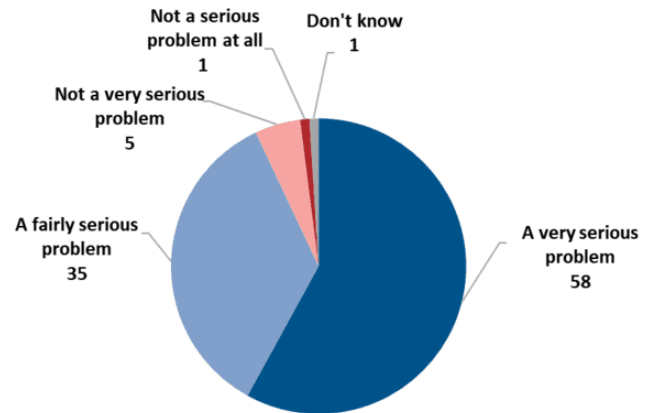

(May / Jun. 2022)

**QA17.1 In your opinion, how serious a problem is each of the following aspects?**  
(% - The level of energy prices for people in (OUR COUNTRY) in general)

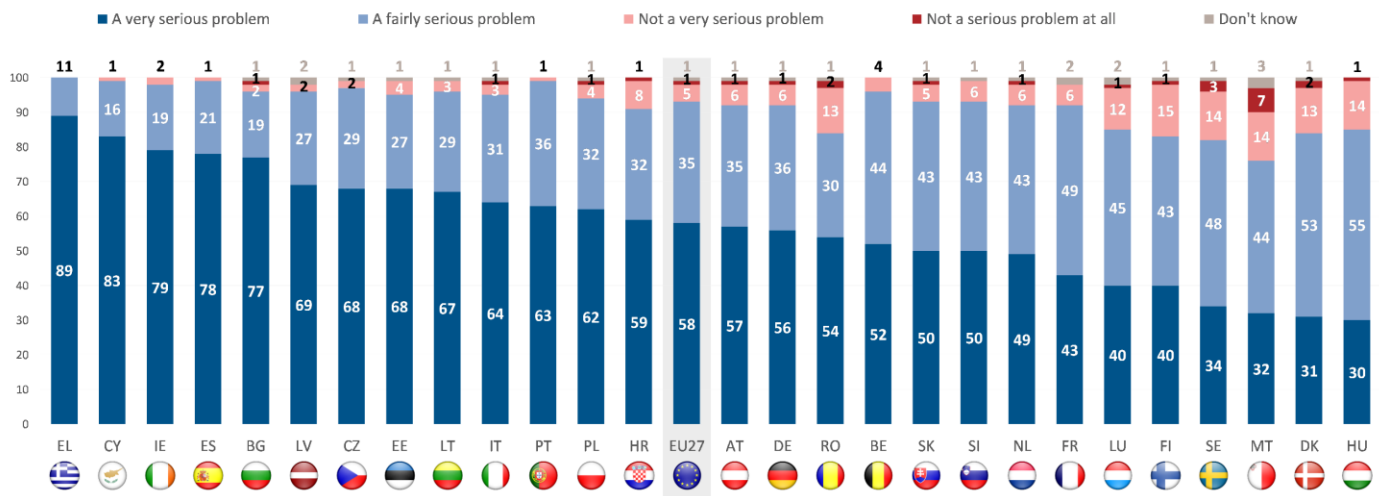

## Special Eurobarometer 527

### Fairness perceptions of the green transition

The proportion of respondents who say the current cost of their household's energy needs is a serious problem varies considerably, ranging from 99% of respondents in Greece, 96% in Cyprus and 94% in Spain and Italy to 36% in Sweden, 46% in the Netherlands and 51% in Denmark.

At least seven in ten in Greece (83%), Cyprus (76%), Spain (71%) and Ireland (70%) say the cost of their household's energy needs is a "very serious problem".

Respondents in Southern European countries and some Eastern European countries are more likely to say that the current cost of their household energy needs is a problem when compared to Northern and Western European countries. A similar pattern applies to the current cost of fuel for transport needs.

QA17.2 In your opinion, how serious a problem is each of the following aspects?  
The current cost of your household's energy needs (lighting, cooking, heating, cooling, running appliances, etc.)  
(% - EU27)

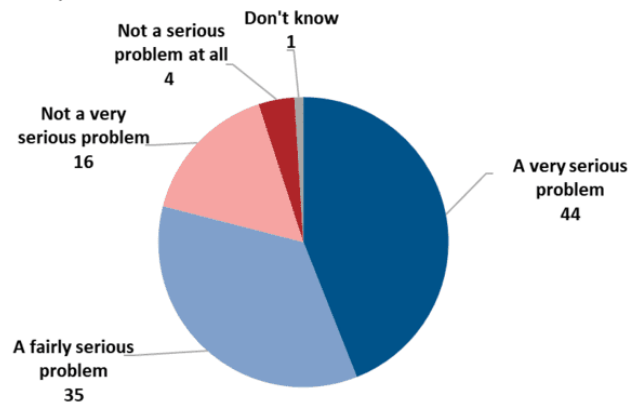

(May / Jun. 2022)

QA17.2 In your opinion, how serious a problem is each of the following aspects?  
(% - The current cost of your household's energy needs (lighting, cooking, heating, cooling, running appliances, etc.))

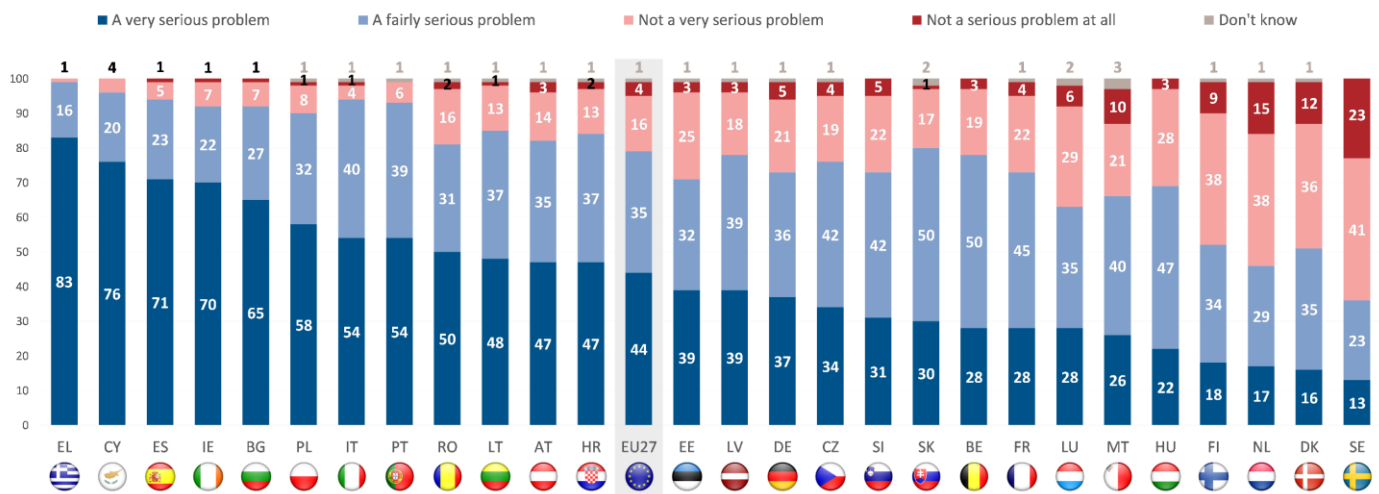

## Special Eurobarometer 527

### Fairness perceptions of the green transition

In all but one country, the majority of respondents say the cost of fuel for their transport needs is a serious problem, and this view is most widespread in Greece, Cyprus (both 97%) and Portugal (95%). At the other end of the scale, 46% in Luxembourg, 54% in Sweden and 56% in Denmark think the same way.

More than eight in ten in Greece (82%) and Cyprus (81%) say the cost of fuel for their transport needs is a “very serious problem”.

**QA17.3 In your opinion, how serious a problem is each of the following aspects?**  
The current cost of fuel for your transport needs (public transport, ticket price increase, private cars, your daily or less frequent mobility needs etc.)  
(% - EU27)

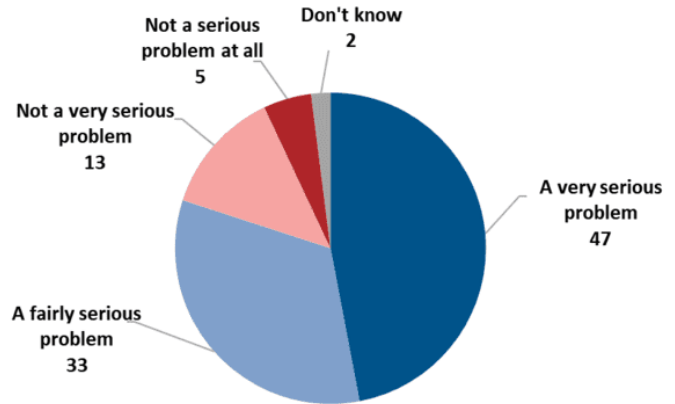

(May / Jun. 2022)

**QA17.3 In your opinion, how serious a problem is each of the following aspects?**  
(% - The current cost of fuel for your transport needs (public transport, ticket price increase, private cars, your daily or less frequent mobility needs etc.))

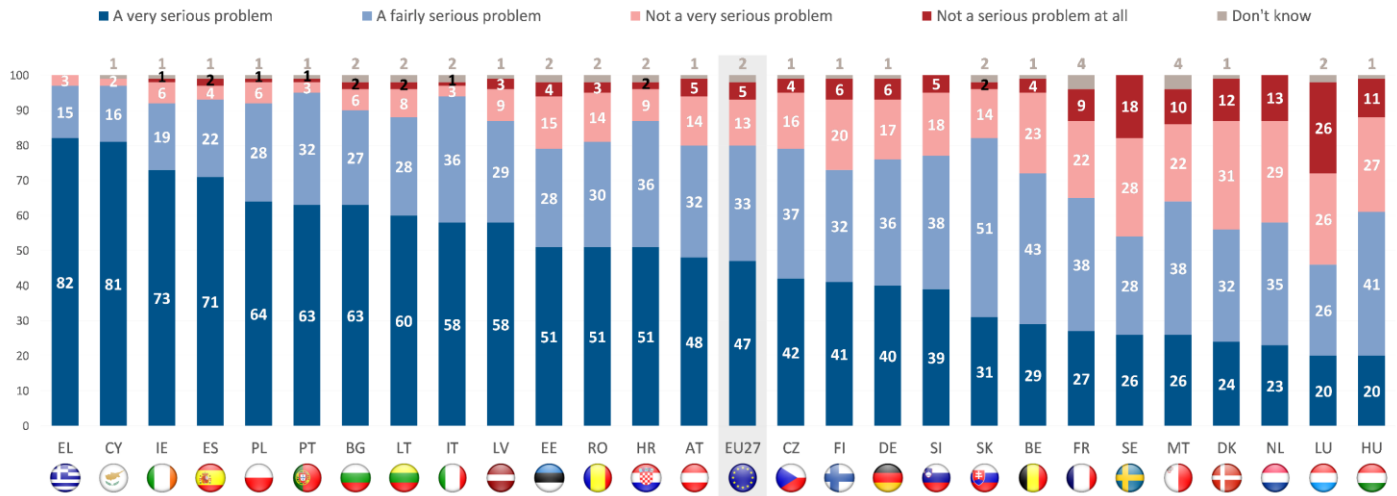

The **socio-demographic analysis at EU level** highlights several differences among respondents, considering gender, age, education level, employment, financial difficulties, income, and also households and tenure. These differences are present in the three statements.

- Women (82%) are more likely than men (77%) to say the current cost of their household's energy needs is a serious problem.
- Those aged 25-54 are more likely than other age groups to say the current cost of fuel for their transport needs is a serious problem. For example, 85% of 25-34-year-olds say this, compared to 77% of those aged 55+.
- Respondents with a lower level of education are more likely to say that the current cost of fuel for their transport needs or the current cost of their household's energy needs is a serious problem. For example, 91% with a below secondary education level say their current household's energy needs are a serious problem, compared to 69% with a university level of education.
- House persons (89%) and the unemployed (87%) are more likely than other employment groups to say the current cost of the household's energy needs is a serious problem.
- The more financial difficulties a respondent experiences, the more likely they are to say the cost of their household's energy needs is a serious problem. In addition, those who experience difficulties paying bills from time to time (87%) or most of the time (88%) are more likely to say the current fuel costs for their transport needs are a serious problem compared to those who rarely have difficulties (77%).
- Respondents with the most disposable income (68%) are the least likely to say the current costs of their household energy needs are a serious problem, particularly compared to those with the least disposable income (84%).
- Respondents who are owners with an outstanding mortgage (75%) are less likely than any other group to say that the current costs of their household's energy needs are a serious problem.
- Households with children (84%) are more likely than any other group to say that the current cost of fuel for their transport needs is a serious problem.

**Special Eurobarometer 527**  
**Fairness perceptions of the green transition**

**QA17** In your opinion, how serious a problem is each of the following aspects?  
(% - Total 'Serious')

|                                                                                                                      | The level of energy prices for people in (OUR COUNTRY) in general | The current cost of fuel for your transport needs (public transport, ticket price increase, private cars, your daily or less frequent mobility needs etc.) | The current cost of your household's energy needs (lighting, cooking, heating, cooling, running appliances, etc.) |
|----------------------------------------------------------------------------------------------------------------------|-------------------------------------------------------------------|------------------------------------------------------------------------------------------------------------------------------------------------------------|-------------------------------------------------------------------------------------------------------------------|
| EU27                                                                                                                 | 93                                                                | 80                                                                                                                                                         | 79                                                                                                                |
|  <b>Gender</b>                      |                                                                   |                                                                                                                                                            |                                                                                                                   |
| Man                                                                                                                  | 92                                                                | 80                                                                                                                                                         | 77                                                                                                                |
| Woman                                                                                                                | 94                                                                | 81                                                                                                                                                         | 82                                                                                                                |
|  <b>Age</b>                         |                                                                   |                                                                                                                                                            |                                                                                                                   |
| 15-24                                                                                                                | 89                                                                | 77                                                                                                                                                         | 77                                                                                                                |
| 25-39                                                                                                                | 93                                                                | 85                                                                                                                                                         | 80                                                                                                                |
| 40-54                                                                                                                | 93                                                                | 83                                                                                                                                                         | 82                                                                                                                |
| 55 +                                                                                                                 | 94                                                                | 77                                                                                                                                                         | 79                                                                                                                |
|  <b>Household situation</b>       |                                                                   |                                                                                                                                                            |                                                                                                                   |
| Single Household without children                                                                                    | 92                                                                | 77                                                                                                                                                         | 79                                                                                                                |
| Single Household with children                                                                                       | 94                                                                | 81                                                                                                                                                         | 83                                                                                                                |
| Multiple Household without children                                                                                  | 93                                                                | 81                                                                                                                                                         | 79                                                                                                                |
| Household with children                                                                                              | 94                                                                | 84                                                                                                                                                         | 81                                                                                                                |
|  <b>Difficulties paying bills</b> |                                                                   |                                                                                                                                                            |                                                                                                                   |
| Most of the time                                                                                                     | 95                                                                | 88                                                                                                                                                         | 93                                                                                                                |
| From time to time                                                                                                    | 93                                                                | 87                                                                                                                                                         | 88                                                                                                                |
| Almost never/ Never                                                                                                  | 93                                                                | 77                                                                                                                                                         | 74                                                                                                                |
| <b>Image of the EU</b>                                                                                               |                                                                   |                                                                                                                                                            |                                                                                                                   |
| Total 'Positive'                                                                                                     | 93                                                                | 79                                                                                                                                                         | 77                                                                                                                |
| Neutral                                                                                                              | 93                                                                | 82                                                                                                                                                         | 81                                                                                                                |
| Total 'Negative'                                                                                                     | 94                                                                | 83                                                                                                                                                         | 84                                                                                                                |
| <b>Total disposable income - quintile</b>                                                                            |                                                                   |                                                                                                                                                            |                                                                                                                   |
| 1st quintile                                                                                                         | 92                                                                | 78                                                                                                                                                         | 84                                                                                                                |
| 2nd quintile                                                                                                         | 95                                                                | 82                                                                                                                                                         | 81                                                                                                                |
| 3rd quintile                                                                                                         | 94                                                                | 83                                                                                                                                                         | 81                                                                                                                |
| 4th quintile                                                                                                         | 92                                                                | 80                                                                                                                                                         | 75                                                                                                                |
| 5th quintile                                                                                                         | 92                                                                | 73                                                                                                                                                         | 68                                                                                                                |
| <b>Employment status</b>                                                                                             |                                                                   |                                                                                                                                                            |                                                                                                                   |
| Employed on an open ended contract                                                                                   | 94                                                                | 84                                                                                                                                                         | 79                                                                                                                |
| Employed on a short-term contract                                                                                    | 91                                                                | 82                                                                                                                                                         | 80                                                                                                                |
| Employed with a temporary work agency / an online platform                                                           | 84                                                                | 86                                                                                                                                                         | 82                                                                                                                |
| Self-employed without employees                                                                                      | 92                                                                | 82                                                                                                                                                         | 80                                                                                                                |
| Self-employed with employees                                                                                         | 88                                                                | 81                                                                                                                                                         | 78                                                                                                                |
| Unemployed                                                                                                           | 95                                                                | 83                                                                                                                                                         | 87                                                                                                                |
| Retired                                                                                                              | 94                                                                | 73                                                                                                                                                         | 78                                                                                                                |
| Looking after home, inactive                                                                                         | 95                                                                | 88                                                                                                                                                         | 89                                                                                                                |
| Student                                                                                                              | 89                                                                | 77                                                                                                                                                         | 78                                                                                                                |
| Other                                                                                                                | 97                                                                | 76                                                                                                                                                         | 80                                                                                                                |



**Special Eurobarometer 527**  
**Fairness perceptions of the green transition**

**QA17** In your opinion, how serious a problem is each of the following aspects?  
 (% - Total 'Serious')

|                                                                                | The level of energy prices for people in (OUR COUNTRY) in general | The current cost of fuel for your transport needs (public transport, ticket price increase, private cars, your daily or less frequent mobility needs etc.) | The current cost of your household's energy needs (lighting, cooking, heating, cooling, running appliances, etc.) |
|--------------------------------------------------------------------------------|-------------------------------------------------------------------|------------------------------------------------------------------------------------------------------------------------------------------------------------|-------------------------------------------------------------------------------------------------------------------|
| EU27                                                                           | 93                                                                | 80                                                                                                                                                         | 79                                                                                                                |
| <b>What is the highest level of education you completed? (ONE ANSWER ONLY)</b> |                                                                   |                                                                                                                                                            |                                                                                                                   |
| Below secondary                                                                | 95                                                                | 83                                                                                                                                                         | 91                                                                                                                |
| Secondary                                                                      | 93                                                                | 83                                                                                                                                                         | 83                                                                                                                |
| Post secondary                                                                 | 94                                                                | 81                                                                                                                                                         | 78                                                                                                                |
| University                                                                     | 91                                                                | 71                                                                                                                                                         | 69                                                                                                                |
| <b>Which of the following applies to the place where you live?</b>             |                                                                   |                                                                                                                                                            |                                                                                                                   |
| Owned by you, your household, without outstanding mortgage                     | 93                                                                | 81                                                                                                                                                         | 82                                                                                                                |
| Owned by you, your household, with outstanding mortgage                        | 93                                                                | 79                                                                                                                                                         | 75                                                                                                                |
| You, your household are tenants or subtenants paying rent at market price      | 92                                                                | 79                                                                                                                                                         | 79                                                                                                                |
| You, your household are tenants or subtenants paying rent at reduced price     | 91                                                                | 78                                                                                                                                                         | 80                                                                                                                |
| Your accommodation is provided free, rent free                                 | 90                                                                | 84                                                                                                                                                         | 82                                                                                                                |
| <b>Which of the following best describes the area where you live?</b>          |                                                                   |                                                                                                                                                            |                                                                                                                   |
| A big city                                                                     | 93                                                                | 78                                                                                                                                                         | 79                                                                                                                |
| The suburbs or outskirts of a big city                                         | 93                                                                | 78                                                                                                                                                         | 75                                                                                                                |
| A town or a small city                                                         | 93                                                                | 80                                                                                                                                                         | 81                                                                                                                |
| A country village                                                              | 92                                                                | 81                                                                                                                                                         | 80                                                                                                                |
| A farm or home in the countryside                                              | 94                                                                | 86                                                                                                                                                         | 81                                                                                                                |

## Special Eurobarometer 527

### Fairness perceptions of the green transition

#### The majority of respondents are confident they could reduce their energy consumption.

Over half (53%) are confident they could use less energy than they do now. More than one in five (22%) are 'very confident', while 31% are 'rather confident'. Almost half (46%) are not confident, with 27% 'rather not confident' and 19% 'not very confident'.<sup>23</sup>

In contrast, only a minority (37%) is confident that a large number of people in their area are ready to limit their energy use in order to limit climate change, with 12% 'very confident' and 25% 'rather confident'. The majority (61%) is not confident: 35% are 'rather not confident' and 26% are 'very not confident'.

**QA5. How confident or not are you about these statements regarding the reduction of energy use? Please use a scale from 1 to 10, where 1 means 'not at all confident', and 10 means 'completely confident'. The remaining numbers indicate something between these two positions.**  
(% - EU)

Overall, how confident are you personally that you could use less energy than you do now?

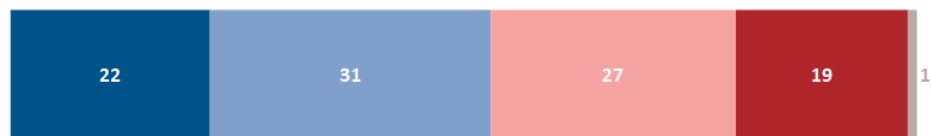

Overall, how confident are you that a large number of people in (OUR COUNTRY) are ready to limit their energy use in order to limit climate change?

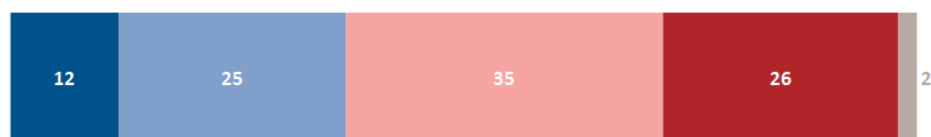

■ Total 'Very confident (8+9+10)'    
 ■ Total 'Rather confident (6+7)'    
 ■ Total 'Rather not confident (4+5)'  
■ Total 'Very not confident (1+2+3)'    
 ■ Refusal (SPONTANEOUS)    
 ■ Don't know

<sup>23</sup> QA5. How confident or not are you about these statements regarding the reduction of energy use? Please use a scale from 1 to 10, where 1 means 'not at all confident', and 10 means 'completely confident'. The remaining numbers indicate something in between these two positions.

5.1 Overall, how confident are you personally that you could use less energy than you do now? 5.2 Overall, how confident are you that a large number of people in (OUR COUNTRY) are ready to limit their energy use in order to limit climate change?

## Special Eurobarometer 527

### Fairness perceptions of the green transition

Across the EU as a whole, just over half (53%) have some level of confidence they could use less energy than they do now, and in 19 countries, the majority also has confidence they could do this. Proportions are highest in Italy (69%), Ireland (68%) and Cyprus (67%), and lowest in Romania (37%), Poland (40%) and Czechia (41%). It is worth noting that the three Nordic countries show a high level of respondents who are confident: at least three in ten respondents are 'very confident' they could personally reduce their energy use in Sweden (39%), Denmark (36%) and Finland (35%).

The highest proportions of respondents who are 'very confident' they could use less energy are seen in Sweden (39%), Cyprus (38%) and Ireland and Denmark (both 37%), while the lowest levels are seen in Romania (12%), Czechia (14%) and Poland (16%).

It is worth noting that more than three in ten in Romania and Estonia (both 33%) are 'very not confident' they could use less energy than they currently do.

**QA5.1 How confident or not are you about these statements regarding the reduction of energy use? Please use a scale from 1 to 10, where 1 means 'not at all confident', and 10 means 'completely confident'. The remaining numbers indicate something in between these two positions.**

**Overall, how confident are you personally that you could use less energy than you do now?**  
(% - EU27)

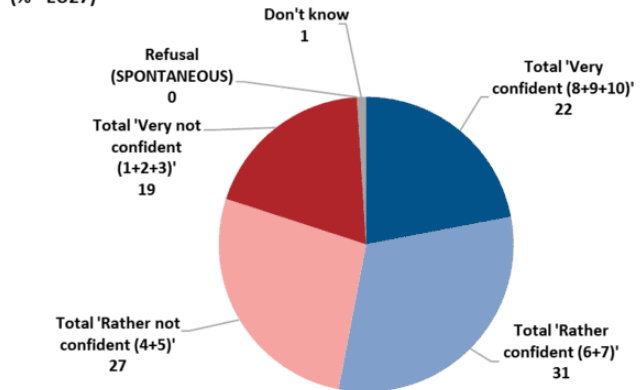

(May / Jun. 2022)

**QA5.1 How confident or not are you about these statements regarding the reduction of energy use? Please use a scale from 1 to 10, where 1 means 'not at all confident', and 10 means 'completely confident'. The remaining numbers indicate something in between these two positions.**  
(% - Overall, how confident are you personally that you could use less energy than you do now?)

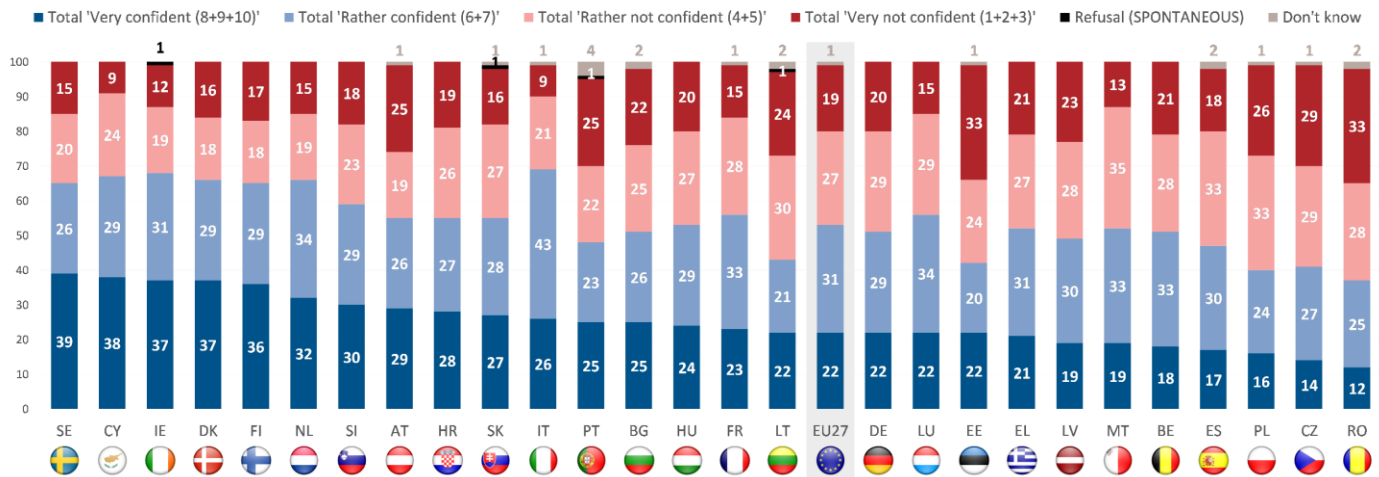

## Special Eurobarometer 527

### Fairness perceptions of the green transition

The **socio-demographic analysis** at EU level highlights the following differences: respondents who are more likely to say they feel confident they could reduce their energy use are young respondents, those with a higher level of education, fewer financial difficulties or those living in small/mid-sized or large towns.

- The younger the respondent, the more likely they are to be confident they could personally use less energy, with 62% of 15–24-year-olds thinking this way compared to 50% of those aged 55+.
- Single households with children (21%) are the most likely to say they feel 'very not confident' they could reduce their energy use.
- Respondents with a lower level of education are more likely to say they are not confident that they could reduce their energy use. For example, respondents with a below secondary level of education (21%) are 'very not confident' they could reduce their energy use, compared to 14% with a university level of education.
- The fewer financial difficulties a respondent experiences, the more likely they are to be confident they can reduce their energy use. For example, 55% with the least difficulties are confident they could use less energy, compared to 44% who experience the most difficulties.
- The more disposable income a respondent has, the more confident they are they could personally use less energy: 58% in the 4<sup>th</sup> and 5<sup>th</sup> quintile are confident, compared to 47% in the 1<sup>st</sup> quintile.
- Respondents who live in small/mid-sized (55%) or large (57%) towns are more likely to be confident they could reduce their energy use than those who live in rural villages (48%).

## Special Eurobarometer 527

### Fairness perceptions of the green transition

**QA5.1** How confident or not are you about these statements regarding the reduction of energy use? Please use a scale from 1 to 10, where 1 means 'not at all confident', and 10 means 'completely confident'. The remaining numbers indicate something in between these two positions.

**Overall, how confident are you personally that you could use less energy than you do now?**  
(% - EU)

|                                                                                                                      | Total 'Very not confident' | Total 'Rather not confident' | Total 'Rather confident' | Total 'Very confident' | Don't know |
|----------------------------------------------------------------------------------------------------------------------|----------------------------|------------------------------|--------------------------|------------------------|------------|
| EU27                                                                                                                 | 19                         | 27                           | 31                       | 22                     | 1          |
|  <b>Gender</b>                      |                            |                              |                          |                        |            |
| Man                                                                                                                  | 19                         | 26                           | 31                       | 23                     | 1          |
| Woman                                                                                                                | 19                         | 27                           | 31                       | 22                     | 1          |
|  <b>Age</b>                         |                            |                              |                          |                        |            |
| 15-24                                                                                                                | 12                         | 25                           | 35                       | 27                     | 1          |
| 25-39                                                                                                                | 17                         | 26                           | 34                       | 23                     | 0          |
| 40-54                                                                                                                | 19                         | 28                           | 31                       | 21                     | 1          |
| 55 +                                                                                                                 | 21                         | 28                           | 28                       | 22                     | 1          |
|  <b>Household situation</b>         |                            |                              |                          |                        |            |
| Single Household without children                                                                                    | 19                         | 27                           | 30                       | 23                     | 1          |
| Single Household with children                                                                                       | 21                         | 30                           | 27                       | 21                     | 1          |
| Multiple Household without children                                                                                  | 18                         | 26                           | 33                       | 22                     | 1          |
| Household with children                                                                                              | 18                         | 27                           | 32                       | 22                     | 1          |
|  <b>Household composition</b>       |                            |                              |                          |                        |            |
| 1                                                                                                                    | 0                          | 0                            | 0                        | 0                      | 0          |
| 2                                                                                                                    | 0                          | 0                            | 0                        | 0                      | 0          |
| 3                                                                                                                    | 23                         | 27                           | 26                       | 23                     | 1          |
| 4+                                                                                                                   | 18                         | 26                           | 32                       | 23                     | 1          |
|  <b>Difficulties paying bills</b> |                            |                              |                          |                        |            |
| Most of the time                                                                                                     | 27                         | 27                           | 25                       | 19                     | 2          |
| From time to time                                                                                                    | 20                         | 28                           | 31                       | 20                     | 1          |
| Almost never/ Never                                                                                                  | 18                         | 26                           | 32                       | 23                     | 1          |
| <b>Total disposable income - quintile</b>                                                                            |                            |                              |                          |                        |            |
| 1st quintile                                                                                                         | 24                         | 27                           | 28                       | 19                     | 2          |
| 2nd quintile                                                                                                         | 19                         | 28                           | 31                       | 21                     | 1          |
| 3rd quintile                                                                                                         | 19                         | 26                           | 32                       | 22                     | 1          |
| 4th quintile                                                                                                         | 17                         | 25                           | 33                       | 25                     | 0          |
| 5th quintile                                                                                                         | 17                         | 25                           | 32                       | 26                     | 0          |
| <b>Employment status</b>                                                                                             |                            |                              |                          |                        |            |
| Employed on an open ended contract                                                                                   | 16                         | 28                           | 33                       | 23                     | 0          |
| Employed on a short-term contract                                                                                    | 18                         | 25                           | 34                       | 22                     | 1          |
| Employed with a temporary work agency / an online platform                                                           | 33                         | 23                           | 31                       | 12                     | 1          |
| Self-employed without employees                                                                                      | 19                         | 23                           | 31                       | 26                     | 1          |
| Self-employed with employees                                                                                         | 30                         | 18                           | 24                       | 26                     | 2          |
| Unemployed                                                                                                           | 21                         | 27                           | 29                       | 22                     | 1          |
| Retired                                                                                                              | 24                         | 27                           | 26                       | 22                     | 1          |
| Looking after home, inactive                                                                                         | 19                         | 27                           | 34                       | 19                     | 1          |
| Student                                                                                                              | 9                          | 24                           | 36                       | 29                     | 2          |
| Other                                                                                                                | 27                         | 33                           | 14                       | 26                     | 0          |
| <b>What is the highest level of education you completed? (ONE ANSWER ONLY)</b>                                       |                            |                              |                          |                        |            |
| Below secondary                                                                                                      | 21                         | 29                           | 26                       | 20                     | 4          |
| Secondary                                                                                                            | 20                         | 27                           | 31                       | 21                     | 1          |
| Post secondary                                                                                                       | 18                         | 27                           | 29                       | 25                     | 0          |
| University                                                                                                           | 14                         | 25                           | 34                       | 27                     | 0          |
| <b>Which of the following best describes the area where you live?</b>                                                |                            |                              |                          |                        |            |
| A big city                                                                                                           | 16                         | 26                           | 32                       | 25                     | 1          |
| The suburbs or outskirts of a big city                                                                               | 19                         | 25                           | 30                       | 26                     | 0          |
| A town or a small city                                                                                               | 17                         | 27                           | 33                       | 22                     | 1          |
| A country village                                                                                                    | 23                         | 29                           | 28                       | 19                     | 1          |
| A farm or home in the countryside                                                                                    | 21                         | 23                           | 30                       | 25                     | 0          |

## Special Eurobarometer 527

### Fairness perceptions of the green transition

Only a minority (37%) in the EU as a whole are confident that a large number in their country is ready to limit their energy use to limit climate change.

At a national level, Italy (56%) and Ireland (50%) are the only countries where at least half are confident to some degree, followed by 49% in Finland. At the other end of the scale, 12% in Czechia, 24% in Latvia and 25% in Malta are confident that a large number of people in their country are ready to reduce their energy usage.

Ireland (25%) and Cyprus (21%) are the only countries where at least one in five is 'very confident'. In contrast, 55% in Czechia are 'very not confident' large numbers of people in their country are ready to limit their energy use, and overall, at least one in five in 23 countries think this way.

**QA5.2 How confident or not are you about these statements regarding the reduction of energy use? Please use a scale from 1 to 10, where 1 means 'not at all confident', and 10 means 'completely confident'. The remaining numbers indicate something in between these two positions.**

**Overall, how confident are you that a large number of people in (OUR COUNTRY) are ready to limit their energy use in order to limit climate change?**  
(% - EU27)

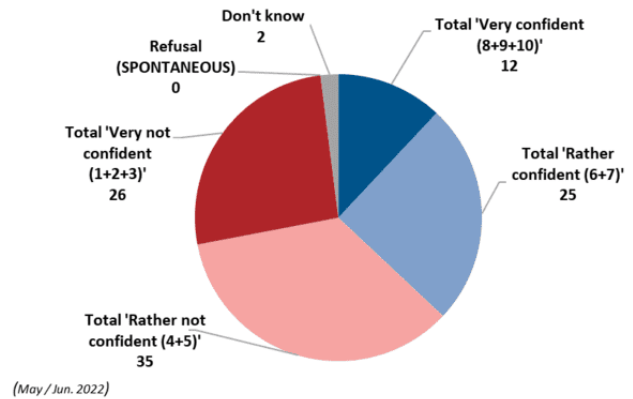

**QA5.2 How confident or not are you about these statements regarding the reduction of energy use? Please use a scale from 1 to 10, where 1 means 'not at all confident', and 10 means 'completely confident'. The remaining numbers indicate something in between these two positions.**

(% - Overall, how confident are you that a large number of people in (OUR COUNTRY) are ready to limit their energy use in order to limit climate change?)

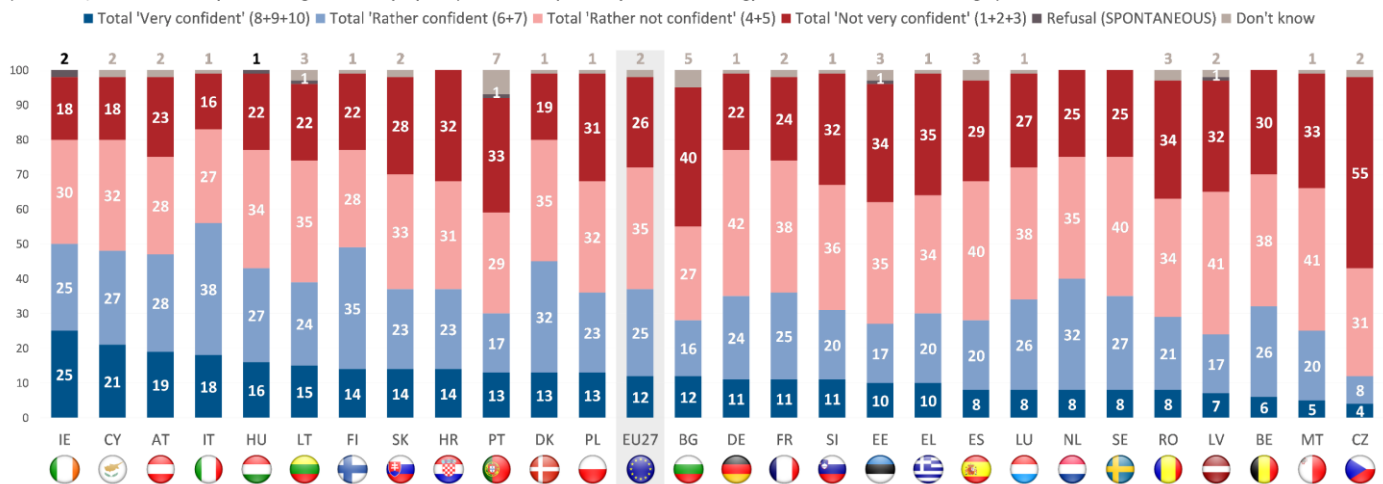

## Special Eurobarometer 527

### Fairness perceptions of the green transition

The **socio-demographic analysis at EU level** illustrates a few differences. For example, there are important differences regarding financial difficulties, employment or household situation.

- Respondents aged 15-24 (41%) are the most likely to be confident large numbers in their country are ready to limit their energy use.
- The self-employed without employees and retired (both 38%) are the most likely to say they are confident large numbers of people in their country are ready to reduce their energy use, particularly compared to unemployed persons (30%).
- The fewer financial difficulties a respondent experiences, the more likely they are to be confident that large numbers of people in their country are ready to reduce their energy use. For instance, 38% with the least difficulties are confident, compared to 31% who experience the most difficulties.
- Single households with children are less likely than other groups to feel confident that a large number of people in their country are ready to limit their energy use in order to limit climate change. For example, single households with children (22%) say they are 'rather confident', compared to multiple households without children (26%).



## Special Eurobarometer 527

### Fairness perceptions of the green transition

**QA5.2** How confident or not are you about these statements regarding the reduction of energy use? Please use a scale from 1 to 10, where 1 means 'not at all confident', and 10 means 'completely confident'. The remaining numbers indicate something in between these two positions.

**Overall, how confident are you that a large number of people in (OUR COUNTRY) are ready to limit their energy use in order to limit climate change?**

(% - EU)

|                                                                                                                      | Total 'Very not confident' | Total 'Rather not confident' | Total 'Rather confident' | Total 'Very confident' | Don't know |
|----------------------------------------------------------------------------------------------------------------------|----------------------------|------------------------------|--------------------------|------------------------|------------|
| EU27                                                                                                                 | 26                         | 35                           | 25                       | 12                     | 2          |
|  <b>Gender</b>                      |                            |                              |                          |                        |            |
| Man                                                                                                                  | 26                         | 35                           | 26                       | 12                     | 1          |
| Woman                                                                                                                | 24                         | 37                           | 25                       | 12                     | 2          |
|  <b>Age</b>                         |                            |                              |                          |                        |            |
| 15-24                                                                                                                | 22                         | 35                           | 28                       | 13                     | 2          |
| 25-39                                                                                                                | 28                         | 35                           | 26                       | 10                     | 1          |
| 40-54                                                                                                                | 27                         | 34                           | 26                       | 12                     | 1          |
| 55 +                                                                                                                 | 26                         | 36                           | 24                       | 12                     | 2          |
|  <b>Household situation</b>         |                            |                              |                          |                        |            |
| Single Household without children                                                                                    | 25                         | 36                           | 24                       | 12                     | 2          |
| Single Household with children                                                                                       | 26                         | 39                           | 22                       | 11                     | 1          |
| Multiple Household without children                                                                                  | 25                         | 36                           | 26                       | 11                     | 2          |
| Household with children                                                                                              | 27                         | 34                           | 26                       | 12                     | 1          |
|  <b>Household composition</b>      |                            |                              |                          |                        |            |
| 1                                                                                                                    | 0                          | 0                            | 0                        | 0                      | 0          |
| 2                                                                                                                    | 0                          | 0                            | 0                        | 0                      | 0          |
| 3                                                                                                                    | 25                         | 38                           | 22                       | 12                     | 3          |
| 4+                                                                                                                   | 25                         | 35                           | 27                       | 12                     | 1          |
|  <b>Difficulties paying bills</b> |                            |                              |                          |                        |            |
| Most of the time                                                                                                     | 32                         | 34                           | 20                       | 11                     | 3          |
| From time to time                                                                                                    | 27                         | 36                           | 25                       | 11                     | 1          |
| Almost never/ Never                                                                                                  | 25                         | 36                           | 26                       | 12                     | 1          |
| <b>Image of the EU</b>                                                                                               |                            |                              |                          |                        |            |
| Total 'Positive'                                                                                                     | 23                         | 35                           | 28                       | 13                     | 1          |
| Neutral                                                                                                              | 26                         | 37                           | 24                       | 11                     | 2          |
| Total 'Negative'                                                                                                     | 37                         | 32                           | 20                       | 10                     | 1          |
| <b>Total disposable income - quintile</b>                                                                            |                            |                              |                          |                        |            |
| 1st quintile                                                                                                         | 25                         | 38                           | 23                       | 12                     | 2          |
| 2nd quintile                                                                                                         | 24                         | 36                           | 26                       | 12                     | 2          |
| 3rd quintile                                                                                                         | 25                         | 37                           | 27                       | 10                     | 1          |
| 4th quintile                                                                                                         | 27                         | 34                           | 27                       | 12                     | 0          |
| 5th quintile                                                                                                         | 28                         | 36                           | 25                       | 11                     | 0          |
| <b>Employment status</b>                                                                                             |                            |                              |                          |                        |            |
| Employed on an open ended contract                                                                                   | 26                         | 36                           | 26                       | 11                     | 1          |
| Employed on a short-term contract                                                                                    | 27                         | 36                           | 27                       | 9                      | 1          |
| Employed with a temporary work agency / an online platform                                                           | 36                         | 28                           | 27                       | 7                      | 2          |
| Self-employed without employees                                                                                      | 28                         | 33                           | 25                       | 13                     | 1          |
| Self-employed with employees                                                                                         | 31                         | 34                           | 22                       | 11                     | 2          |
| Unemployed                                                                                                           | 32                         | 36                           | 21                       | 9                      | 1          |
| Retired                                                                                                              | 24                         | 35                           | 25                       | 13                     | 3          |
| Looking after home, inactive                                                                                         | 23                         | 37                           | 23                       | 14                     | 3          |
| Student                                                                                                              | 20                         | 37                           | 28                       | 14                     | 1          |
| Other                                                                                                                | 30                         | 36                           | 19                       | 13                     | 2          |
| <b>What is the highest level of education you completed? (ONE ANSWER ONLY)</b>                                       |                            |                              |                          |                        |            |
| Below secondary                                                                                                      | 22                         | 38                           | 19                       | 12                     | 8          |
| Secondary                                                                                                            | 25                         | 35                           | 26                       | 13                     | 1          |
| Post secondary                                                                                                       | 26                         | 36                           | 25                       | 12                     | 1          |
| University                                                                                                           | 26                         | 36                           | 26                       | 11                     | 1          |
| <b>Which of the following best describes the area where you live?</b>                                                |                            |                              |                          |                        |            |
| A big city                                                                                                           | 27                         | 35                           | 24                       | 13                     | 1          |
| The suburbs or outskirts of a big city                                                                               | 26                         | 35                           | 25                       | 13                     | 1          |
| A town or a small city                                                                                               | 24                         | 36                           | 27                       | 11                     | 2          |
| A country village                                                                                                    | 27                         | 35                           | 24                       | 12                     | 2          |
| A farm or home in the countryside                                                                                    | 26                         | 35                           | 21                       | 17                     | 1          |

## Special Eurobarometer 527

### Fairness perceptions of the green transition

#### Economic reasons are the factor for reducing energy use among the respondents.

Saving money is the main motivator for reducing energy use, although environmental concerns play a role for many.<sup>24</sup> Overall more than six in ten (62%) say they would reduce their energy use mainly or only for economic reasons, while 36% would do so mainly or only for environmental reasons. Almost four in ten (37%) say they would reduce their energy use mostly for economic reasons, to save money, and to some extent for environmental reasons to help tackle climate change. Around one quarter (26%) would reduce their energy consumption mostly for environmental reasons to help tackle climate change and, to some extent for economic reasons, to save money. One quarter (25%) would reduce consumption just for economic reasons, to save money. One in ten (10%) would reduce energy use purely for environmental reasons to help tackle climate change.

There are three countries where respondents most often say they would reduce their energy consumption for **economic reasons only**: Bulgaria (47%), Latvia (40%) and Lithuania (37%). In contrast, 12% in Slovenia and 13% in Sweden and the Netherlands say the same.

In 18 countries, respondents are most likely to say they would reduce their energy use **mostly for economic reasons, to save money, and to some extent for environmental reasons to help tackle climate change**. This view is most widespread in Greece (50%), Portugal (47%) and Slovakia (44%). In contrast, 31% in Sweden and Ireland give this reason.

QA4 Thinking about the main reason why you would reduce your energy use, which one corresponds best to your own situation? You would reduce your energy use: (% - EU27)

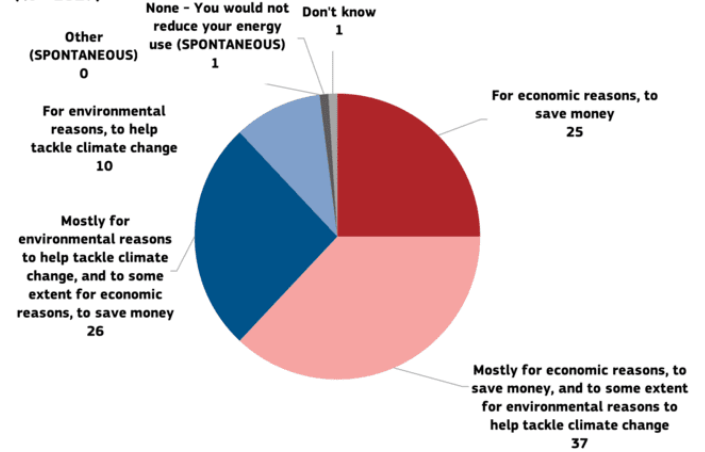

(May / Jun. 2022)

Sweden, the Netherlands (both 39%) and Denmark (36%) are the only countries where the most common answer is they would reduce consumption **mostly for environmental reasons and, to some extent, for economic reasons**. At the other end of the scale, 12% in Bulgaria and 15% in Estonia, Latvia and Poland give this reason.

In 15 countries, at least one in ten respondents say they would reduce their energy usage just for **environmental reasons**, with the highest levels seen in Sweden (16%), Denmark (14%) and Slovenia (13%).

Taking a broader overview shows that in 24 countries, economic reasons are the main or only consideration in reducing energy use,

QA4 Thinking about the main reason why you would reduce your energy use, which one corresponds best to your own situation? You would reduce your energy use: (%)

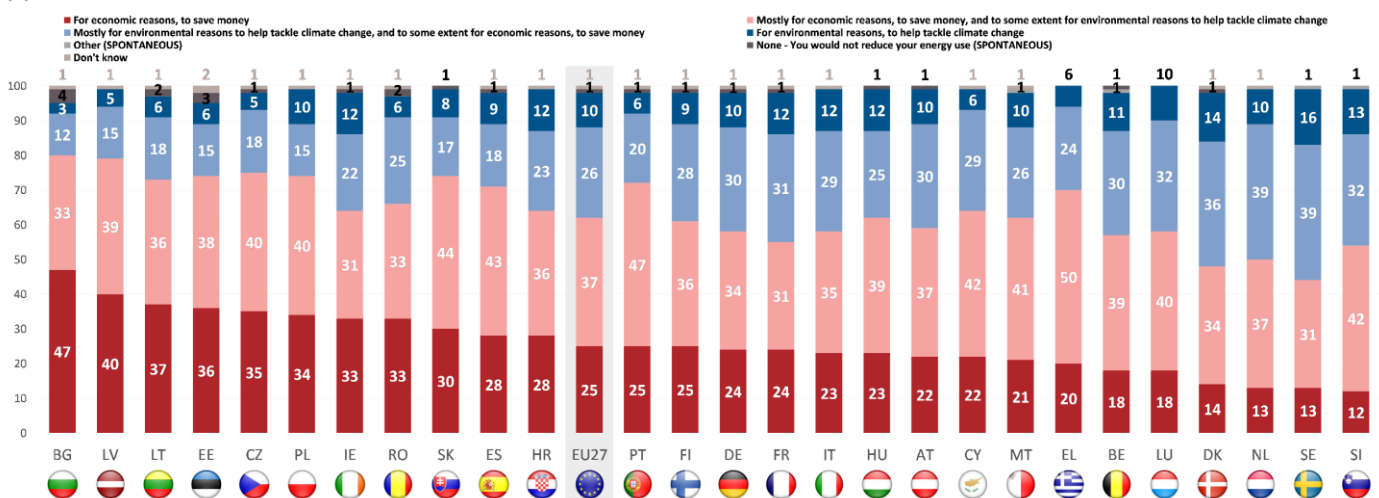

<sup>24</sup> QA4. Thinking about the main reason why you would reduce your energy use, which one corresponds best to your own situation? You would reduce your energy use:

**Special Eurobarometer 527**  
**Fairness perceptions of the green transition**

conversely, environmental reasons are most often the main or only consideration in Sweden, Denmark and the Netherlands.

The **socio-demographic analysis** at EU level highlights that younger respondents, those with a high level of education, those with fewer financial difficulties, and those with a positive view of the EU are the most likely to mention mainly or only environmental reasons for reducing energy consumption. In detail:

- The younger the respondent, the more likely they are to mention environmental reasons as either the primary or the only reason. For example, 31% of those aged 15-24 would reduce consumption mostly for environmental reasons but to some extent for economic reasons, compared to 24% of those aged 55+. In addition, the older the respondent, the more likely they are to mention economic reasons only.
- The higher the level of education of respondents, the more likely they are to mention environmental reasons as either the primary or the only reasons, and the less likely they are to only mention economic reasons. For example, 36% of those with a university level of education say they would reduce their energy use for mostly environmental reasons, compared to 11% of those with an education level below secondary.
- The fewer financial difficulties a respondent experiences, the more likely they are to mention environmental reasons as either the primary or the only reason for reducing consumption, and the less likely they are to only mention economic reasons. For instance, 22% who never or almost never have difficulties paying bills would reduce consumption for economic reasons only, compared to 40% who experience difficulties most of the time.
- The more disposable income a respondent has, the more likely they are to mention environmental reasons as either the primary or the only reason for reducing consumption. For example, 47% in the 5th quintile mention mainly or only environmental reasons compared to 30% in the 1st quintile.
- Those with a positive view of the EU are much more likely to mention mostly environmental reasons (31%) and less likely to mention only economic reasons (20%) than those with a negative view (20% and 36%, respectively).

## Special Eurobarometer 527

### Fairness perceptions of the green transition

**QA4** Thinking about the main reason why you would reduce your energy use, which one corresponds best to your own situation? You would reduce your energy use: (% - EU)

|                                                                                                                   | For economic reasons, to save money | Mostly for economic reasons, to save money, and to some extent for environmental reasons to help tackle climate change | Mostly for environmental reasons to help tackle climate change, and to some extent for economic reasons, to save money | For environmental reasons, to help tackle climate change | Other (SPONTANEOUS) | None - You would not reduce your energy use (SPONTANEOUS) | Mainly for economic reasons | Mainly for environmental reasons | Don't know |
|-------------------------------------------------------------------------------------------------------------------|-------------------------------------|------------------------------------------------------------------------------------------------------------------------|------------------------------------------------------------------------------------------------------------------------|----------------------------------------------------------|---------------------|-----------------------------------------------------------|-----------------------------|----------------------------------|------------|
| EU27                                                                                                              | 25                                  | 37                                                                                                                     | 26                                                                                                                     | 10                                                       | 0                   | 1                                                         | 62                          | 36                               | 1          |
|  <b>Gender</b>                    |                                     |                                                                                                                        |                                                                                                                        |                                                          |                     |                                                           |                             |                                  |            |
| Man                                                                                                               | 26                                  | 36                                                                                                                     | 26                                                                                                                     | 10                                                       | 0                   | 1                                                         | 62                          | 36                               | 1          |
| Woman                                                                                                             | 25                                  | 37                                                                                                                     | 27                                                                                                                     | 9                                                        | 0                   | 1                                                         | 62                          | 36                               | 1          |
|  <b>Age</b>                       |                                     |                                                                                                                        |                                                                                                                        |                                                          |                     |                                                           |                             |                                  |            |
| 15-24                                                                                                             | 18                                  | 34                                                                                                                     | 31                                                                                                                     | 15                                                       | 0                   | 1                                                         | 52                          | 46                               | 1          |
| 25-39                                                                                                             | 22                                  | 39                                                                                                                     | 29                                                                                                                     | 9                                                        | 0                   | 1                                                         | 61                          | 38                               | 0          |
| 40-54                                                                                                             | 24                                  | 39                                                                                                                     | 26                                                                                                                     | 10                                                       | 0                   | 1                                                         | 63                          | 36                               | 0          |
| 55 +                                                                                                              | 30                                  | 34                                                                                                                     | 24                                                                                                                     | 10                                                       | 0                   | 1                                                         | 64                          | 34                               | 1          |
|  <b>Household situation</b>       |                                     |                                                                                                                        |                                                                                                                        |                                                          |                     |                                                           |                             |                                  |            |
| Single Household without children                                                                                 | 27                                  | 34                                                                                                                     | 26                                                                                                                     | 11                                                       | 0                   | 1                                                         | 61                          | 37                               | 1          |
| Single Household with children                                                                                    | 27                                  | 39                                                                                                                     | 25                                                                                                                     | 8                                                        | 0                   | 0                                                         | 66                          | 33                               | 1          |
| Multiple Household without children                                                                               | 26                                  | 36                                                                                                                     | 27                                                                                                                     | 9                                                        | 0                   | 1                                                         | 62                          | 36                               | 1          |
| Household with children                                                                                           | 23                                  | 40                                                                                                                     | 26                                                                                                                     | 10                                                       | 0                   | 1                                                         | 63                          | 36                               | 0          |
|  <b>Difficulties paying bills</b> |                                     |                                                                                                                        |                                                                                                                        |                                                          |                     |                                                           |                             |                                  |            |
| Most of the time                                                                                                  | 40                                  | 36                                                                                                                     | 16                                                                                                                     | 6                                                        | 0                   | 1                                                         | 76                          | 22                               | 1          |
| From time to time                                                                                                 | 30                                  | 38                                                                                                                     | 22                                                                                                                     | 8                                                        | 0                   | 1                                                         | 68                          | 30                               | 1          |
| Almost never/ Never                                                                                               | 22                                  | 36                                                                                                                     | 29                                                                                                                     | 11                                                       | 0                   | 1                                                         | 58                          | 40                               | 1          |
| <b>Image of the EU</b>                                                                                            |                                     |                                                                                                                        |                                                                                                                        |                                                          |                     |                                                           |                             |                                  |            |
| Total 'Positive'                                                                                                  | 20                                  | 38                                                                                                                     | 31                                                                                                                     | 11                                                       | 0                   | 0                                                         | 58                          | 42                               | 0          |
| Neutral                                                                                                           | 28                                  | 36                                                                                                                     | 24                                                                                                                     | 10                                                       | 0                   | 1                                                         | 64                          | 34                               | 1          |
| Total 'Negative'                                                                                                  | 36                                  | 33                                                                                                                     | 20                                                                                                                     | 8                                                        | 1                   | 1                                                         | 69                          | 28                               | 1          |
| <b>Total disposable income - quintile</b>                                                                         |                                     |                                                                                                                        |                                                                                                                        |                                                          |                     |                                                           |                             |                                  |            |
| 1st quintile                                                                                                      | 36                                  | 32                                                                                                                     | 22                                                                                                                     | 8                                                        | 0                   | 1                                                         | 68                          | 30                               | 1          |
| 2nd quintile                                                                                                      | 27                                  | 39                                                                                                                     | 24                                                                                                                     | 8                                                        | 0                   | 1                                                         | 66                          | 32                               | 1          |
| 3rd quintile                                                                                                      | 24                                  | 39                                                                                                                     | 27                                                                                                                     | 9                                                        | 0                   | 1                                                         | 63                          | 36                               | 0          |
| 4th quintile                                                                                                      | 22                                  | 39                                                                                                                     | 29                                                                                                                     | 9                                                        | 0                   | 1                                                         | 61                          | 38                               | 0          |
| 5th quintile                                                                                                      | 16                                  | 36                                                                                                                     | 32                                                                                                                     | 15                                                       | 0                   | 1                                                         | 52                          | 47                               | 0          |
| <b>Employment status</b>                                                                                          |                                     |                                                                                                                        |                                                                                                                        |                                                          |                     |                                                           |                             |                                  |            |
| Employed on an open ended contract                                                                                | 23                                  | 40                                                                                                                     | 28                                                                                                                     | 9                                                        | 0                   | 0                                                         | 63                          | 37                               | 0          |
| Employed on a short-term contract                                                                                 | 23                                  | 38                                                                                                                     | 28                                                                                                                     | 10                                                       | 0                   | 0                                                         | 61                          | 38                               | 1          |
| Employed with a temporary work agency / an online platform                                                        | 23                                  | 30                                                                                                                     | 38                                                                                                                     | 7                                                        | 1                   | 1                                                         | 53                          | 45                               | 0          |
| Self-employed without employees                                                                                   | 19                                  | 39                                                                                                                     | 29                                                                                                                     | 11                                                       | 0                   | 1                                                         | 58                          | 40                               | 1          |
| Self-employed with employees                                                                                      | 20                                  | 34                                                                                                                     | 31                                                                                                                     | 11                                                       | 0                   | 2                                                         | 54                          | 42                               | 2          |
| Unemployed                                                                                                        | 32                                  | 37                                                                                                                     | 19                                                                                                                     | 10                                                       | 0                   | 1                                                         | 69                          | 29                               | 1          |
| Retired                                                                                                           | 31                                  | 34                                                                                                                     | 23                                                                                                                     | 10                                                       | 0                   | 1                                                         | 65                          | 33                               | 1          |
| Looking after home, inactive                                                                                      | 35                                  | 34                                                                                                                     | 22                                                                                                                     | 6                                                        | 0                   | 1                                                         | 69                          | 28                               | 2          |
| Student                                                                                                           | 17                                  | 32                                                                                                                     | 33                                                                                                                     | 16                                                       | 0                   | 1                                                         | 49                          | 49                               | 1          |
| Other                                                                                                             | 29                                  | 36                                                                                                                     | 18                                                                                                                     | 13                                                       | 0                   | 4                                                         | 65                          | 31                               | 0          |
| <b>What is the highest level of education you completed? (ONE ANSWER ONLY)</b>                                    |                                     |                                                                                                                        |                                                                                                                        |                                                          |                     |                                                           |                             |                                  |            |
| Below secondary                                                                                                   | 42                                  | 35                                                                                                                     | 11                                                                                                                     | 7                                                        | 1                   | 2                                                         | 77                          | 18                               | 2          |
| Secondary                                                                                                         | 29                                  | 37                                                                                                                     | 24                                                                                                                     | 9                                                        | 0                   | 1                                                         | 66                          | 33                               | 0          |
| Post secondary                                                                                                    | 19                                  | 38                                                                                                                     | 30                                                                                                                     | 12                                                       | 0                   | 1                                                         | 57                          | 42                               | 0          |
| University                                                                                                        | 15                                  | 35                                                                                                                     | 36                                                                                                                     | 13                                                       | 0                   | 1                                                         | 50                          | 49                               | 0          |
| <b>Which of the following best describes the area where you live?</b>                                             |                                     |                                                                                                                        |                                                                                                                        |                                                          |                     |                                                           |                             |                                  |            |
| A big city                                                                                                        | 23                                  | 37                                                                                                                     | 29                                                                                                                     | 10                                                       | 0                   | 1                                                         | 60                          | 39                               | 0          |
| The suburbs or outskirts of a big city                                                                            | 20                                  | 39                                                                                                                     | 29                                                                                                                     | 10                                                       | 0                   | 1                                                         | 59                          | 39                               | 1          |
| A town or a small city                                                                                            | 26                                  | 37                                                                                                                     | 25                                                                                                                     | 10                                                       | 0                   | 1                                                         | 63                          | 35                               | 1          |
| A country village                                                                                                 | 29                                  | 34                                                                                                                     | 25                                                                                                                     | 9                                                        | 0                   | 2                                                         | 63                          | 34                               | 1          |
| A farm or home in the countryside                                                                                 | 30                                  | 36                                                                                                                     | 25                                                                                                                     | 8                                                        | 0                   | 0                                                         | 66                          | 33                               | 1          |

## Special Eurobarometer 527

### Fairness perceptions of the green transition

The majority (64%) of respondents are unwilling to pay higher energy prices to help speed up the green transition.<sup>25</sup> Almost half (46%) are unwilling because they cannot afford to pay more, while 18% are unwilling but could afford it. Just over one-third (34%) would be willing to pay more: 21% would pay up to 10% more, 8% would pay up to 20% more, 3% up to 30% more, and 2% would pay increases of more than 30%.

There are only four countries where a majority of respondents would be willing to pay higher energy prices to speed up the green transition: the Netherlands, Sweden (both 56%), Denmark (54%) and Malta (49% vs 47% no). In contrast, 14% in Bulgaria and Portugal and 23% in Poland would be willing to pay more.

In every country except Romania, more than one in ten respondents would be willing to pay **up to 10% more**, with the most support for this seen in Slovenia (31%), Denmark and Germany (both 30%).

In nine countries, at least one in ten would be willing to pay **up to 20% more**, and this is particularly the case in the Netherlands (18%), Sweden (17%) and Denmark (16%). Malta (10%) is the only country where at least one in ten would be willing to pay **up to 30% more** for energy to speed up the green transition, while those in Romania (5%) are the most likely to be willing to pay up **increases of 30% or more**.

In every country except the Netherlands and Sweden, respondents are more likely to be unwilling to pay because they cannot afford it rather than being unwilling but able to pay more. The countries with the largest gap between those unwilling, because they cannot or can afford to pay more, are Bulgaria (70% unwilling and cannot afford it vs 13% unwilling but can afford it), Portugal (69% vs 13%) and Cyprus (57% and 5%).

QA18 Would you be willing to pay higher energy prices if that helps to speed up the green transition? (% - EU27)

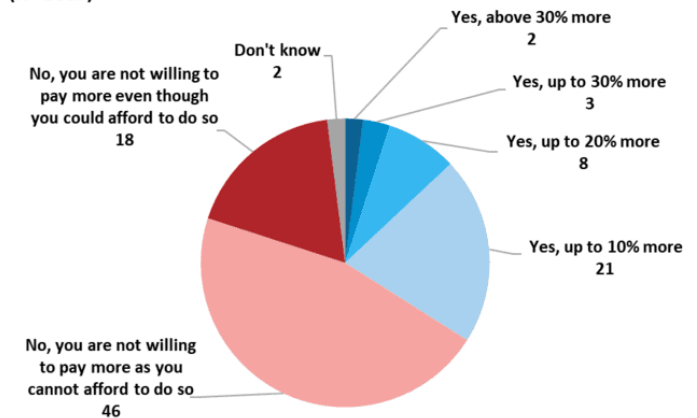

(May/Jun. 2022)

QA18 Would you be willing to pay higher energy prices if that helps to speed up the green transition? (%)

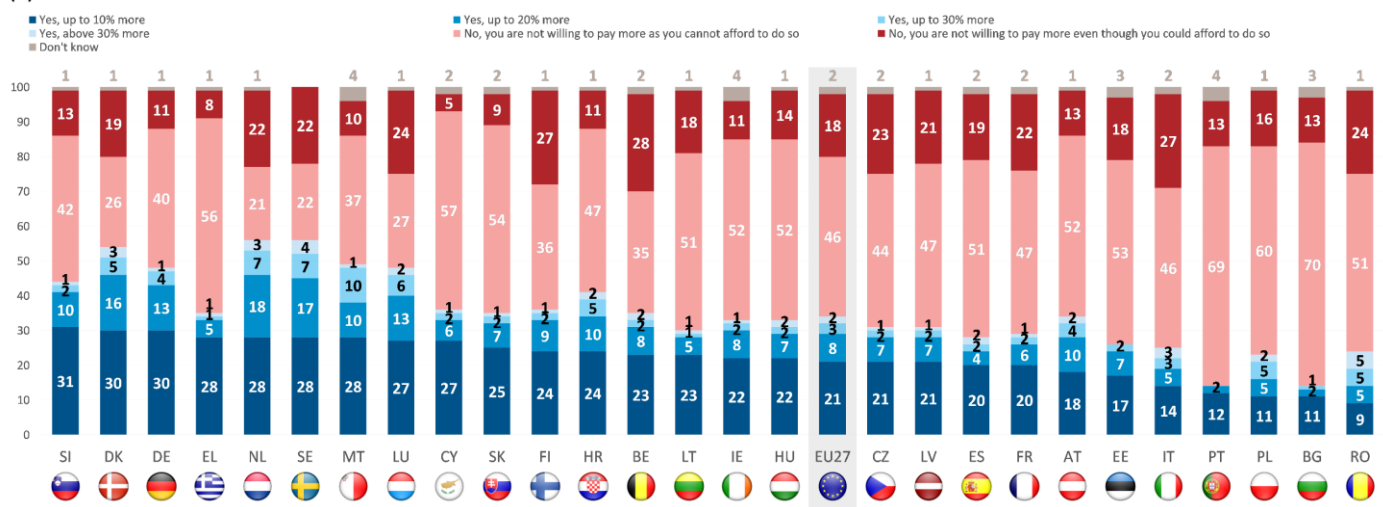

<sup>25</sup> QA18. Would you be willing to pay higher energy prices if that helps to speed up the green transition?

## Special Eurobarometer 527

### Fairness perceptions of the green transition

The **socio-demographic analysis at EU level** shows that only a minority in most groups are willing to pay higher energy prices to speed up the green transition, but there are some interesting differences, particularly regarding employment, urbanization, or view of the EU.

- The younger the respondent, the more likely they are to be willing to pay more: 39% of 15-24-year-olds say they are, compared to 30% of those aged 55+.
- Respondents with a high level of education are much more likely to be willing to pay higher energy prices to speed up the green transition. For example, 29% of respondents with a university level say they are willing to pay higher energy prices, compared to 10% of those with an education level below secondary.
- The fewer financial difficulties a respondent experiences, the more likely they are to be willing to pay more: 39% with the least difficulties are willing, compared to 15% of those with the most difficulties.
- The more disposable income a respondent has, the more likely they are to be willing to pay more: 52% in the 5<sup>th</sup> quintile are willing, compared to 23% in the 1<sup>st</sup> quintile.
- The self-employed with employees (47%) are much more likely to be willing to pay more – particularly compared to house persons (17%).
- Respondents living in large towns (40%) are more likely to be willing to pay more than those in small/mid-sized towns (32%) or rural villages (27%).
- Those with a positive view of the EU (41%) are more likely to be willing to pay more than those with a negative view (20%).



**Special Eurobarometer 527**  
**Fairness perceptions of the green transition**

**QA18** Would you be willing to pay higher energy prices if that helps to speed up the green transition?  
(% - EU)

|                                                                                                                   | Yes, up to 10% more | Yes, up to 20% more | Yes, up to 30% more | Yes, above 30% more | No, you are not willing to pay more as you cannot afford to do so | No, you are not willing to pay more even though you could afford to do so | Total 'Yes' | Total 'No' | Don't know |
|-------------------------------------------------------------------------------------------------------------------|---------------------|---------------------|---------------------|---------------------|-------------------------------------------------------------------|---------------------------------------------------------------------------|-------------|------------|------------|
| EU27                                                                                                              | 21                  | 8                   | 3                   | 2                   | 46                                                                | 18                                                                        | 34          | 64         | 2          |
|  <b>Gender</b>                    |                     |                     |                     |                     |                                                                   |                                                                           |             |            |            |
| Man                                                                                                               | 21                  | 9                   | 3                   | 2                   | 42                                                                | 21                                                                        | 35          | 63         | 2          |
| Woman                                                                                                             | 21                  | 7                   | 3                   | 1                   | 51                                                                | 16                                                                        | 32          | 67         | 1          |
|  <b>Age</b>                       |                     |                     |                     |                     |                                                                   |                                                                           |             |            |            |
| 15-24                                                                                                             | 25                  | 9                   | 3                   | 2                   | 43                                                                | 13                                                                        | 39          | 56         | 5          |
| 25-39                                                                                                             | 22                  | 9                   | 4                   | 2                   | 44                                                                | 18                                                                        | 37          | 62         | 1          |
| 40-54                                                                                                             | 20                  | 8                   | 3                   | 2                   | 46                                                                | 20                                                                        | 33          | 66         | 1          |
| 55 +                                                                                                              | 19                  | 7                   | 3                   | 1                   | 49                                                                | 20                                                                        | 30          | 69         | 1          |
|  <b>Difficulties paying bills</b> |                     |                     |                     |                     |                                                                   |                                                                           |             |            |            |
| Most of the time                                                                                                  | 9                   | 3                   | 2                   | 1                   | 74                                                                | 11                                                                        | 15          | 85         | 0          |
| From time to time                                                                                                 | 16                  | 4                   | 3                   | 2                   | 59                                                                | 15                                                                        | 25          | 74         | 1          |
| Almost never/ Never                                                                                               | 24                  | 10                  | 3                   | 2                   | 38                                                                | 21                                                                        | 39          | 59         | 2          |
| <b>Image of the EU</b>                                                                                            |                     |                     |                     |                     |                                                                   |                                                                           |             |            |            |
| Total 'Positive'                                                                                                  | 26                  | 10                  | 4                   | 1                   | 40                                                                | 17                                                                        | 41          | 57         | 2          |
| Neutral                                                                                                           | 18                  | 7                   | 3                   | 2                   | 51                                                                | 18                                                                        | 30          | 69         | 1          |
| Total 'Negative'                                                                                                  | 12                  | 4                   | 2                   | 2                   | 53                                                                | 26                                                                        | 20          | 79         | 1          |
| <b>Total disposable income - quintile</b>                                                                         |                     |                     |                     |                     |                                                                   |                                                                           |             |            |            |
| 1st quintile                                                                                                      | 15                  | 5                   | 2                   | 1                   | 64                                                                | 12                                                                        | 23          | 76         | 1          |
| 2nd quintile                                                                                                      | 19                  | 7                   | 3                   | 2                   | 53                                                                | 15                                                                        | 31          | 68         | 1          |
| 3rd quintile                                                                                                      | 23                  | 8                   | 2                   | 2                   | 45                                                                | 19                                                                        | 35          | 64         | 1          |
| 4th quintile                                                                                                      | 25                  | 11                  | 5                   | 2                   | 35                                                                | 21                                                                        | 43          | 56         | 1          |
| 5th quintile                                                                                                      | 28                  | 15                  | 6                   | 3                   | 25                                                                | 22                                                                        | 52          | 47         | 1          |
| <b>Employment status</b>                                                                                          |                     |                     |                     |                     |                                                                   |                                                                           |             |            |            |
| Employed on an open ended contract                                                                                | 23                  | 9                   | 3                   | 2                   | 42                                                                | 20                                                                        | 37          | 62         | 1          |
| Employed on a short-term contract                                                                                 | 18                  | 10                  | 5                   | 1                   | 52                                                                | 13                                                                        | 34          | 65         | 1          |
| Employed with a temporary work agency / an online platform                                                        | 8                   | 11                  | 7                   | 10                  | 48                                                                | 15                                                                        | 36          | 63         | 1          |
| Self-employed without employees                                                                                   | 21                  | 7                   | 5                   | 3                   | 38                                                                | 24                                                                        | 36          | 62         | 2          |
| Self-employed with employees                                                                                      | 27                  | 7                   | 6                   | 7                   | 23                                                                | 28                                                                        | 47          | 51         | 2          |
| Unemployed                                                                                                        | 15                  | 4                   | 1                   | 2                   | 64                                                                | 14                                                                        | 22          | 78         | 0          |
| Retired                                                                                                           | 19                  | 7                   | 3                   | 1                   | 50                                                                | 19                                                                        | 30          | 69         | 1          |
| Looking after home, inactive                                                                                      | 11                  | 4                   | 1                   | 1                   | 65                                                                | 16                                                                        | 17          | 81         | 2          |
| Student                                                                                                           | 28                  | 10                  | 2                   | 2                   | 39                                                                | 13                                                                        | 42          | 52         | 6          |
| Other                                                                                                             | 14                  | 0                   | 6                   | 1                   | 63                                                                | 16                                                                        | 21          | 79         | 0          |
| <b>What is the highest level of education you completed? (ONE ANSWER ONLY)</b>                                    |                     |                     |                     |                     |                                                                   |                                                                           |             |            |            |
| Below secondary                                                                                                   | 10                  | 2                   | 1                   | 0                   | 69                                                                | 15                                                                        | 13          | 84         | 3          |
| Secondary                                                                                                         | 18                  | 6                   | 2                   | 2                   | 52                                                                | 18                                                                        | 28          | 70         | 2          |
| Post secondary                                                                                                    | 24                  | 8                   | 3                   | 2                   | 41                                                                | 21                                                                        | 37          | 62         | 1          |
| University                                                                                                        | 29                  | 14                  | 6                   | 3                   | 27                                                                | 20                                                                        | 52          | 47         | 1          |
| <b>Which of the following best describes the area where you live?</b>                                             |                     |                     |                     |                     |                                                                   |                                                                           |             |            |            |
| A big city                                                                                                        | 24                  | 10                  | 4                   | 2                   | 41                                                                | 17                                                                        | 40          | 58         | 2          |
| The suburbs or outskirts of a big city                                                                            | 25                  | 10                  | 4                   | 1                   | 39                                                                | 19                                                                        | 40          | 58         | 2          |
| A town or a small city                                                                                            | 20                  | 7                   | 3                   | 2                   | 47                                                                | 19                                                                        | 32          | 66         | 2          |
| A country village                                                                                                 | 16                  | 6                   | 2                   | 2                   | 54                                                                | 19                                                                        | 26          | 73         | 1          |
| A farm or home in the countryside                                                                                 | 16                  | 7                   | 1                   | 3                   | 48                                                                | 24                                                                        | 27          | 72         | 1          |

## Special Eurobarometer 527

### Fairness perceptions of the green transition

#### Half of the respondents think the richest 50% should increase their efforts to reduce energy use.

The majority of respondents in the EU think wealthier people, in particular, should make more efforts to reduce their energy consumption.<sup>26</sup> Half (50%) think the richest 50% should make more effort, while 25% think the wealthiest 20% should make more effort, and 12% think the richest 10% should make more effort. About one in ten (9%) thinks everyone should do more regardless of their wealth.

In 27 countries, respondents most often say the **richest 50%** of the population in their country should make more efforts to reduce their energy consumption, although proportions range from 62% in Cyprus, 61% in Spain and 60% in the Netherlands and Sweden to 29% in Estonia, 35% in Bulgaria and 41% in Portugal.

In Poland (41%), Romania (37%) and Austria (32%), respondents most often say the **richest 20%** should be doing more, and this option is also widely mentioned in Croatia (33%), Greece (32%), Slovakia (31%) and Bulgaria (30%). Overall, more than one in ten in each country think the richest 20% should be doing more.

In 19 countries, at least one in ten think the **richest 10%** should make more efforts to reduce their energy consumption, with the highest levels seen in Poland (23%), Austria (22%) and Romania (19%).

In 11 countries, at least one in ten respondents *spontaneously* say **everyone should be doing more** regardless of wealth, with the highest levels seen in Portugal (23%), Estonia (21%) and Lithuania (17%).

QA7 Which of the following groups of the population in (OUR COUNTRY) do you believe should particularly make more efforts to reduce their energy consumption? (% - EU27)

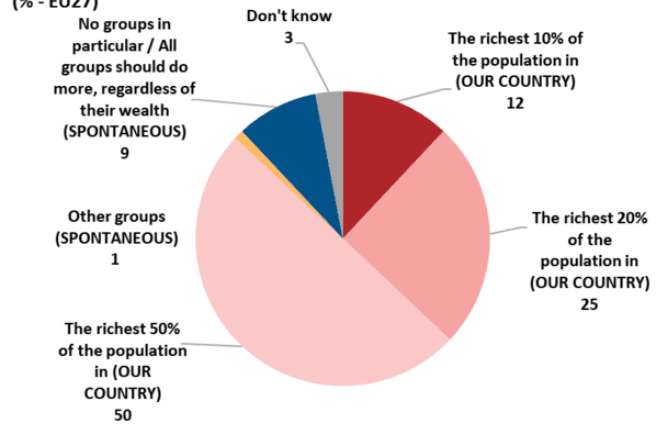

(May / Jun. 2022)

QA7 Which of the following groups of the population in (OUR COUNTRY) do you believe should particularly make more efforts to reduce their energy consumption? (%)

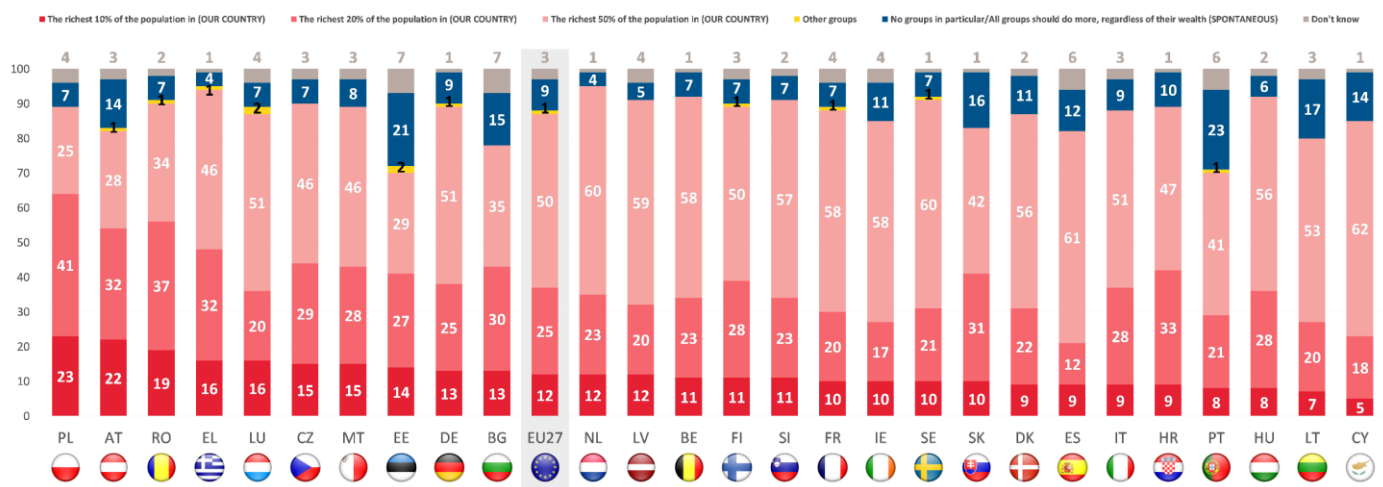

<sup>26</sup> QA7. Which of the following groups of the population in (OUR COUNTRY) do you believe should particularly make more efforts to reduce their energy consumption?

## Special Eurobarometer 527

### Fairness perceptions of the green transition

The **socio-demographic analysis at EU level** shows very little difference in opinion between groups. The most notable is that the younger the respondent, the more likely they are to agree that the richest 20% in their country should make more efforts to reduce their energy consumption: 30% of 15–24-year-olds think this way, compared to 22% of those aged 55 and older. In addition, respondents with a secondary level of education (27%) are the most likely to think that the richest 20% should make more efforts to reduce their energy, compared to 18% of those with a level below secondary or 21% of those with a post-secondary level. It is worth noting that there is very little difference in opinion in income groups, even though the question is tied to this sociodemographic differentiation.

**Special Eurobarometer 527**  
**Fairness perceptions of the green transition**

**QA7** Which of the following groups of the population in (OUR COUNTRY) do you believe should particularly make more efforts to reduce their energy consumption?  
(% - EU)

|                                                                                                                    | The richest 10% of the population in<br>(OUR COUNTRY) | The richest 20% of the population in<br>(OUR COUNTRY) | The richest 50% of the population in<br>(OUR COUNTRY) | Other groups | No groups in particular / All groups<br>should do more, regardless of their<br>wealth (SPONTANEOUS) | Don't know |
|--------------------------------------------------------------------------------------------------------------------|-------------------------------------------------------|-------------------------------------------------------|-------------------------------------------------------|--------------|-----------------------------------------------------------------------------------------------------|------------|
| EU27                                                                                                               | 12                                                    | 25                                                    | 50                                                    | 1            | 9                                                                                                   | 3          |
|  <b>Gender</b>                    |                                                       |                                                       |                                                       |              |                                                                                                     |            |
| Man                                                                                                                | 13                                                    | 26                                                    | 49                                                    | 0            | 9                                                                                                   | 3          |
| Woman                                                                                                              | 12                                                    | 25                                                    | 51                                                    | 0            | 9                                                                                                   | 3          |
|  <b>Age</b>                       |                                                       |                                                       |                                                       |              |                                                                                                     |            |
| 15-24                                                                                                              | 12                                                    | 30                                                    | 48                                                    | 0            | 7                                                                                                   | 3          |
| 25-39                                                                                                              | 13                                                    | 29                                                    | 48                                                    | 0            | 8                                                                                                   | 2          |
| 40-54                                                                                                              | 11                                                    | 25                                                    | 52                                                    | 1            | 9                                                                                                   | 2          |
| 55 +                                                                                                               | 13                                                    | 22                                                    | 50                                                    | 1            | 10                                                                                                  | 4          |
|  <b>Difficulties paying bills</b> |                                                       |                                                       |                                                       |              |                                                                                                     |            |
| Most of the time                                                                                                   | 14                                                    | 23                                                    | 53                                                    | 0            | 7                                                                                                   | 3          |
| From time to time                                                                                                  | 13                                                    | 28                                                    | 47                                                    | 1            | 8                                                                                                   | 3          |
| Almost never/ Never                                                                                                | 12                                                    | 24                                                    | 51                                                    | 0            | 10                                                                                                  | 3          |
| <b>Image of the EU</b>                                                                                             |                                                       |                                                       |                                                       |              |                                                                                                     |            |
| Total 'Positive'                                                                                                   | 12                                                    | 25                                                    | 51                                                    | 0            | 10                                                                                                  | 2          |
| Neutral                                                                                                            | 11                                                    | 26                                                    | 50                                                    | 0            | 9                                                                                                   | 4          |
| Total 'Negative'                                                                                                   | 15                                                    | 23                                                    | 49                                                    | 1            | 9                                                                                                   | 3          |
| <b>Total disposable income - quintile</b>                                                                          |                                                       |                                                       |                                                       |              |                                                                                                     |            |
| 1st quintile                                                                                                       | 9                                                     | 24                                                    | 54                                                    | 1            | 7                                                                                                   | 5          |
| 2nd quintile                                                                                                       | 13                                                    | 25                                                    | 52                                                    | 1            | 7                                                                                                   | 2          |
| 3rd quintile                                                                                                       | 12                                                    | 27                                                    | 50                                                    | 1            | 8                                                                                                   | 2          |
| 4th quintile                                                                                                       | 13                                                    | 29                                                    | 49                                                    | 0            | 7                                                                                                   | 2          |
| 5th quintile                                                                                                       | 12                                                    | 26                                                    | 51                                                    | 0            | 10                                                                                                  | 1          |
| <b>Employment status</b>                                                                                           |                                                       |                                                       |                                                       |              |                                                                                                     |            |
| Employed on an open ended contract                                                                                 | 13                                                    | 27                                                    | 49                                                    | 0            | 9                                                                                                   | 2          |
| Employed on a short-term contract                                                                                  | 11                                                    | 29                                                    | 50                                                    | 1            | 7                                                                                                   | 2          |
| Employed with a temporary work agency / an online platform                                                         | 5                                                     | 40                                                    | 43                                                    | 0            | 6                                                                                                   | 6          |
| Self-employed without employees                                                                                    | 11                                                    | 25                                                    | 51                                                    | 0            | 11                                                                                                  | 2          |
| Self-employed with employees                                                                                       | 10                                                    | 26                                                    | 47                                                    | 2            | 15                                                                                                  | 0          |
| Unemployed                                                                                                         | 11                                                    | 20                                                    | 57                                                    | 0            | 8                                                                                                   | 4          |
| Retired                                                                                                            | 13                                                    | 22                                                    | 50                                                    | 0            | 10                                                                                                  | 5          |
| Looking after home, inactive                                                                                       | 11                                                    | 22                                                    | 51                                                    | 0            | 10                                                                                                  | 6          |
| Student                                                                                                            | 10                                                    | 32                                                    | 47                                                    | 0            | 8                                                                                                   | 3          |
| Other                                                                                                              | 5                                                     | 19                                                    | 41                                                    | 0            | 34                                                                                                  | 1          |
| <b>What is the highest level of education you completed? (ONE ANSWER ONLY)</b>                                     |                                                       |                                                       |                                                       |              |                                                                                                     |            |
| Below secondary                                                                                                    | 12                                                    | 18                                                    | 48                                                    | 0            | 12                                                                                                  | 10         |
| Secondary                                                                                                          | 12                                                    | 27                                                    | 49                                                    | 0            | 9                                                                                                   | 3          |
| Post secondary                                                                                                     | 12                                                    | 21                                                    | 54                                                    | 1            | 10                                                                                                  | 2          |
| University                                                                                                         | 13                                                    | 24                                                    | 52                                                    | 0            | 10                                                                                                  | 1          |
| <b>Which of the following best describes the area where you live?</b>                                              |                                                       |                                                       |                                                       |              |                                                                                                     |            |
| A big city                                                                                                         | 12                                                    | 27                                                    | 48                                                    | 0            | 10                                                                                                  | 3          |
| The suburbs or outskirts of a big city                                                                             | 12                                                    | 23                                                    | 50                                                    | 0            | 12                                                                                                  | 3          |
| A town or a small city                                                                                             | 10                                                    | 25                                                    | 52                                                    | 1            | 9                                                                                                   | 3          |
| A country village                                                                                                  | 16                                                    | 25                                                    | 47                                                    | 0            | 8                                                                                                   | 4          |
| A farm or home in the countryside                                                                                  | 14                                                    | 22                                                    | 54                                                    | 0            | 7                                                                                                   | 3          |

## Special Eurobarometer 527

### Fairness perceptions of the green transition

#### Most respondents rate their energy consumption as lower than that of other people.

Most respondents rate their energy consumption as lower than other people in their country.<sup>27</sup> Almost half (49%) say it is 'rather low' in comparison, while 21% rate their consumption as 'very low' compared to others in their country. Almost one quarter (23%) say their consumption is rather high in comparison, and 5% say it is very high. Just 2% are unable to answer.

With the exception of Italy, respondents in every country most often describe their energy consumption as **'rather low'** compared to others in their country. Proportions range from 60% in Czechia, 57% in Germany and 55% in Spain to 40% in Austria and 41% in Slovenia and Romania.

Italy (42%) is the only country where a majority rates their energy consumption as **'rather high'** compared to others in their country, although 36% in Romania, 33% in Malta and 30% in Croatia also place themselves in this category. In contrast, 11% in Czechia, 14% in Estonia and 15% in Slovenia and Germany also place themselves in this category.

In 16 countries, at least one in five respondents rates their energy consumption as **'very low'** compared to others in their country, with respondents in Estonia (40%), Slovenia (39%) and Finland (33%) being the most likely to say this. At the other end of the scale, 9% in Italy, 13% in Poland and 14% in Malta and Romania also rate their usage as 'very low'.

**QA6. Let's now talk about your energy consumption. How does your energy consumption compare with that of other people in (OUR COUNTRY)? Please use a scale from 1 to 10, where 1 means 'among the lowest compared with other people in (OUR COUNTRY)', and 10 means 'among the highest compared with other people in (OUR COUNTRY)'. The remaining numbers indicate something in between these two positions.** (% - EU27)

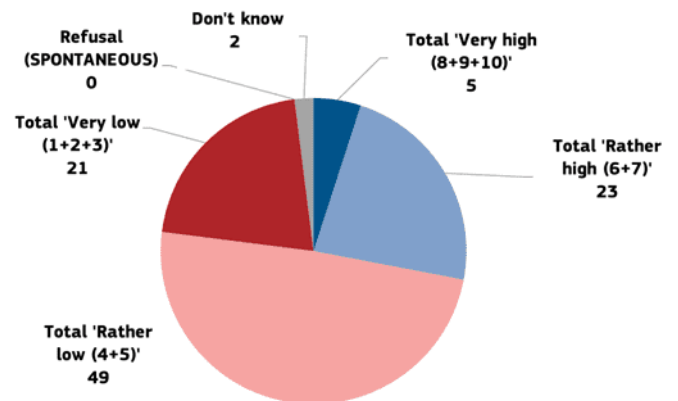

(May / Jun. 2022)

Poland (14%) is the only country where at least one in ten describe their energy consumption as **'very high'** compared to others in their country.

Taking a broader view of these results shows that Czechia, Estonia, Germany, Lithuania and Slovenia have the highest proportion of respondents who rate their energy consumption as lower than others in their country. Conversely, respondents in Italy, Romania, Poland and Malta are the most likely to rate their consumption as higher than others in their country.

**QA6 Let's now talk about your energy consumption. How does your energy consumption compare with that of other people in (OUR COUNTRY)? Please use a scale from 1 to 10, where 1 means 'among the lowest compared with other people in (OUR COUNTRY)', and 10 means 'among the highest compared with other people in (OUR COUNTRY)'. The remaining numbers indicate something between these two positions.**

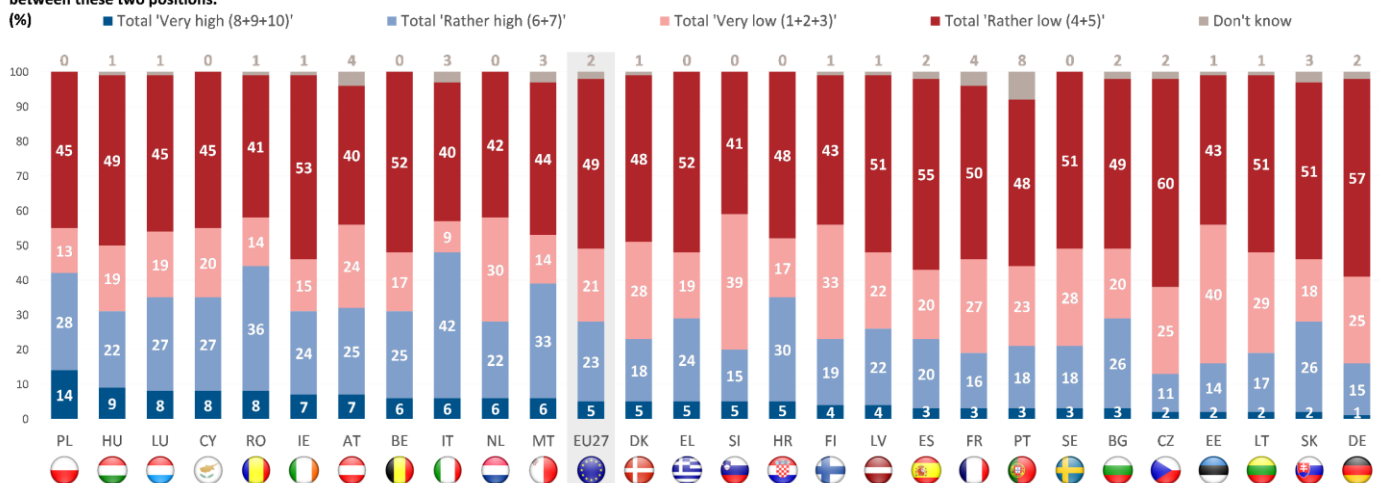

<sup>27</sup> QA6. Let's now talk about your energy consumption. How does your energy consumption compare with that of other people in (OUR COUNTRY)? Please use a scale from 1 to 10, where 1 means 'among the lowest compared with other people in (OUR COUNTRY)', and 10 means

'among the highest compared with other people in (OUR COUNTRY)'. The remaining numbers indicate something in between these two positions.

## Special Eurobarometer 527

### Fairness perceptions of the green transition

Results from the **socio-demographic analysis at EU level** show that in each group, respondents are most likely to rate their usage as 'rather low' compared to others. However, it does reveal some interesting differences in those answering 'very low' or 'rather high':

- Respondents aged 55+ are the most likely to rate their consumption as 'very low' (27%) and the least likely to rate it as 'rather high' (18%) when compared to other age groups.
- Respondents with an education level below secondary (30%) are more likely than any other group to rate their consumption as 'very low'. For example, 30% of those with an education level below secondary say their energy use is 'very low', compared to 20% of those with a university level.
- Retired (28%) and unemployed persons (27%) are more likely than other employment groups to say their consumption is 'very low'. Respondents employed with a temporary work agency / an online platform (34%) are the most likely to say their consumption is 'rather high'.
- Respondents living in households with children are more likely to rate their consumption as 'rather high' (30%) and less likely to rate it as 'very low' (13%) compared to those living in households without children.
- Those who have difficulties paying bills most of the time are more likely to rate their consumption as 'very low' (32%) and the least likely to rate it as 'rather high' (18%) than those who experience fewer financial difficulties.
- The more disposable income a respondent has, the more likely it is to say their energy use is 'rather high' and the less likely they are to say it is 'very low'.
- Homeowners (either with or without a mortgage) are more likely to say their consumption is 'rather high' and less likely to say it is 'very low' when compared to those who pay rent.

**Special Eurobarometer 527**  
**Fairness perceptions of the green transition**

**QA6** Let's now talk about your energy consumption. How does your energy consumption compare with that of other people in (OUR COUNTRY)? Please use a scale from 1 to 10, where 1 means 'among the lowest compared with other people in (OUR COUNTRY)', and 10 means 'among the highest compared with other people in (OUR COUNTRY)'. The remaining numbers indicate something in between these two positions. (% - EU)

|                                                                                                                    | Total 'Very low (1+2+3)' | Total 'Rather low (4+5)' | Total 'Rather high (6+7)' | Total 'Very high (8+9+10)' | Don't know |
|--------------------------------------------------------------------------------------------------------------------|--------------------------|--------------------------|---------------------------|----------------------------|------------|
| EU27                                                                                                               | 21                       | 49                       | 23                        | 5                          | 2          |
|  <b>Gender</b>                    |                          |                          |                           |                            |            |
| Man                                                                                                                | 20                       | 49                       | 24                        | 5                          | 2          |
| Woman                                                                                                              | 22                       | 49                       | 22                        | 5                          | 2          |
|  <b>Age</b>                       |                          |                          |                           |                            |            |
| 15-24                                                                                                              | 16                       | 51                       | 24                        | 6                          | 3          |
| 25-39                                                                                                              | 16                       | 50                       | 27                        | 5                          | 2          |
| 40-54                                                                                                              | 18                       | 49                       | 27                        | 5                          | 1          |
| 55 +                                                                                                               | 27                       | 49                       | 18                        | 4                          | 2          |
|  <b>Difficulties paying bills</b> |                          |                          |                           |                            |            |
| Most of the time                                                                                                   | 32                       | 45                       | 18                        | 3                          | 2          |
| From time to time                                                                                                  | 18                       | 48                       | 27                        | 5                          | 2          |
| Almost never/ Never                                                                                                | 21                       | 51                       | 22                        | 4                          | 2          |
| <b>Total disposable income - quintile</b>                                                                          |                          |                          |                           |                            |            |
| 1st quintile                                                                                                       | 33                       | 47                       | 15                        | 2                          | 3          |
| 2nd quintile                                                                                                       | 24                       | 51                       | 19                        | 5                          | 1          |
| 3rd quintile                                                                                                       | 20                       | 53                       | 22                        | 4                          | 1          |
| 4th quintile                                                                                                       | 14                       | 52                       | 29                        | 4                          | 1          |
| 5th quintile                                                                                                       | 15                       | 48                       | 29                        | 7                          | 1          |
| <b>Employment status</b>                                                                                           |                          |                          |                           |                            |            |
| Employed on an open ended contract                                                                                 | 16                       | 50                       | 28                        | 5                          | 1          |
| Employed on a short-term contract                                                                                  | 23                       | 52                       | 19                        | 4                          | 2          |
| Employed with a temporary work agency / an online platform                                                         | 14                       | 42                       | 34                        | 9                          | 1          |
| Self-employed without employees                                                                                    | 17                       | 51                       | 26                        | 5                          | 1          |
| Self-employed with employees                                                                                       | 13                       | 46                       | 31                        | 10                         | 0          |
| Unemployed                                                                                                         | 27                       | 51                       | 18                        | 3                          | 1          |
| Retired                                                                                                            | 28                       | 48                       | 16                        | 5                          | 3          |
| Looking after home, inactive                                                                                       | 23                       | 45                       | 22                        | 6                          | 4          |
| Student                                                                                                            | 15                       | 52                       | 25                        | 4                          | 4          |
| Other                                                                                                              | 24                       | 41                       | 21                        | 4                          | 10         |
| <b>What is the highest level of education you completed? (ONE ANSWER ONLY)</b>                                     |                          |                          |                           |                            |            |
| Below secondary                                                                                                    | 30                       | 43                       | 16                        | 4                          | 7          |
| Secondary                                                                                                          | 19                       | 50                       | 23                        | 6                          | 2          |
| Post secondary                                                                                                     | 22                       | 51                       | 21                        | 4                          | 2          |
| University                                                                                                         | 20                       | 49                       | 26                        | 4                          | 1          |
| <b>Which of the following applies to the place where you live?</b>                                                 |                          |                          |                           |                            |            |
| Owned by you, your household, without outstanding mortgage                                                         | 19                       | 49                       | 26                        | 4                          | 2          |
| Owned by you, your household, with outstanding mortgage                                                            | 18                       | 48                       | 27                        | 5                          | 2          |
| You, your household are tenants or subtenants paying rent at market price                                          | 24                       | 52                       | 18                        | 4                          | 2          |
| You, your household are tenants or subtenants paying rent at reduced price                                         | 31                       | 46                       | 16                        | 5                          | 2          |
| Your accommodation is provided free, rent free                                                                     | 17                       | 47                       | 24                        | 11                         | 1          |
| <b>Which of the following best describes the area where you live?</b>                                              |                          |                          |                           |                            |            |
| A big city                                                                                                         | 22                       | 48                       | 24                        | 5                          | 1          |
| The suburbs or outskirts of a big city                                                                             | 25                       | 50                       | 19                        | 4                          | 2          |
| A town or a small city                                                                                             | 19                       | 50                       | 24                        | 5                          | 2          |
| A country village                                                                                                  | 22                       | 49                       | 21                        | 6                          | 2          |
| A farm or home in the countryside                                                                                  | 25                       | 39                       | 27                        | 9                          | 0          |



### **III. FOCUS ON SPECIFIC DIMENSIONS ENABLING CITIZENS TO THRIVE IN THE GREEN TRANSITION**

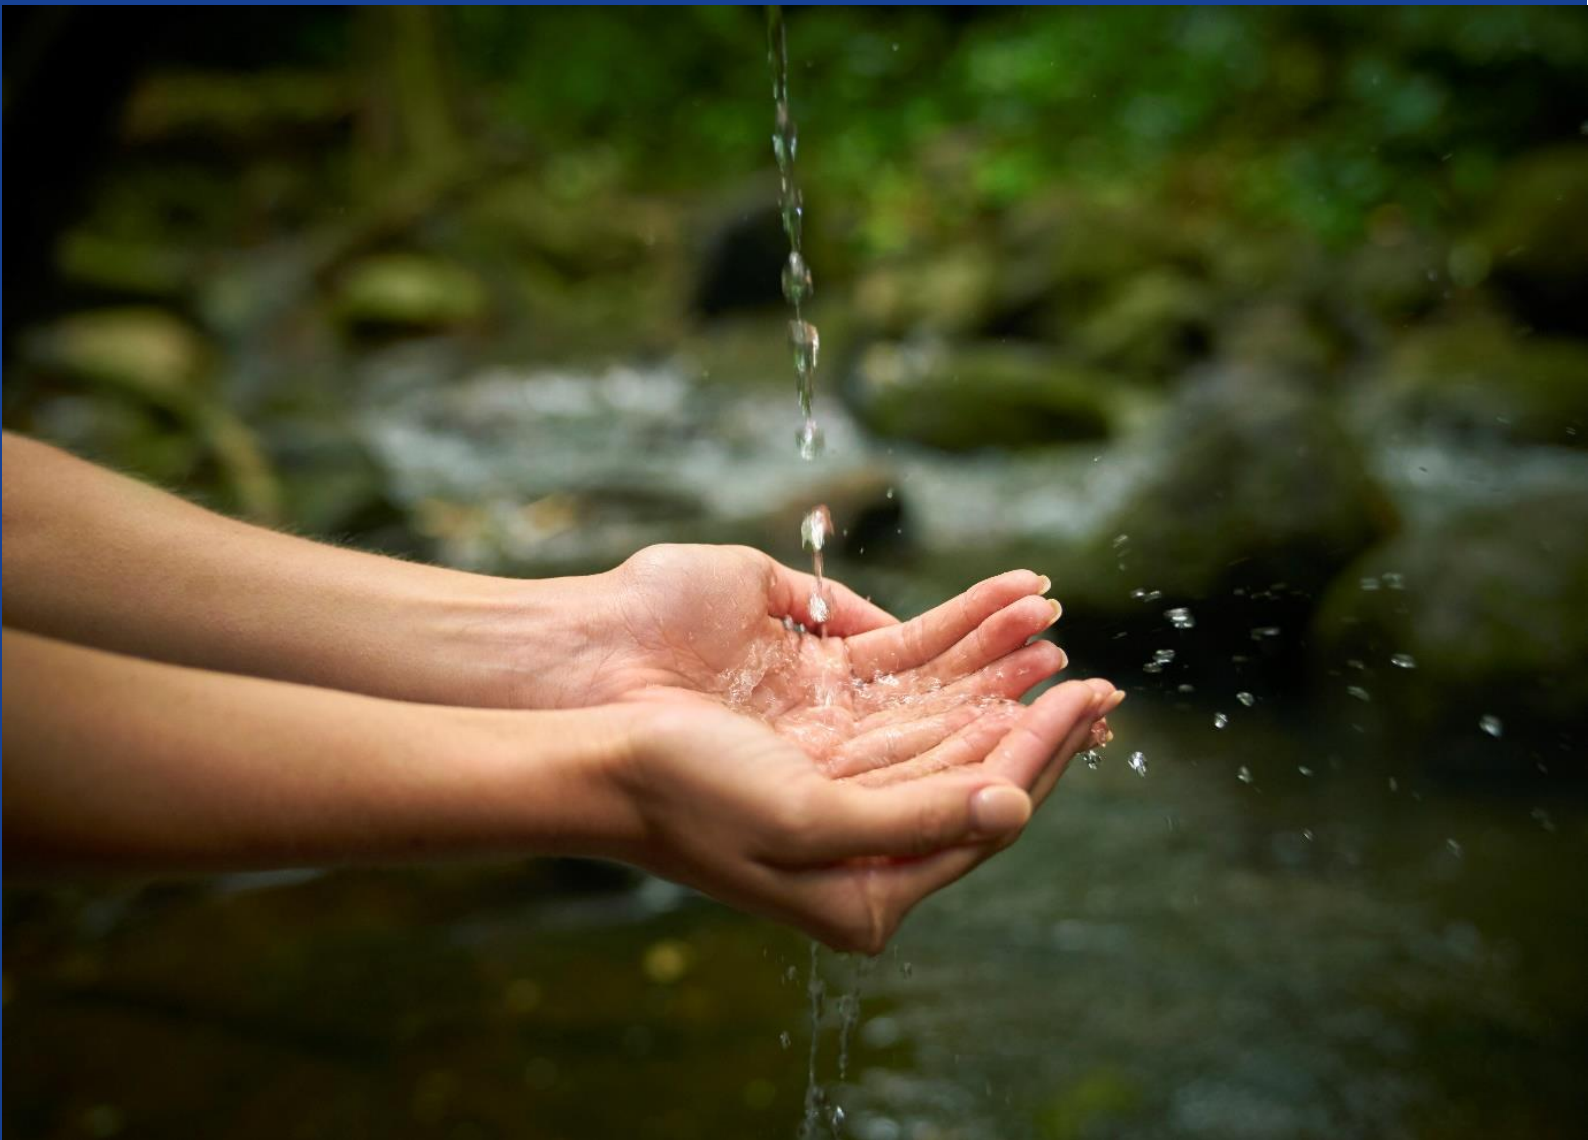

## 1. Energy-efficient housing

More than a third of respondents have taken measures to make their homes more energy efficient in the last five years. Over the same period, 1 in 10 received financial assistance to improve their home's energy efficiency.

Four in ten respondents (40%) believe their home needs an energy-efficient renovation.<sup>28</sup> More than half (56%) say it does not, and 4% say they don't know.

In the last five years, 35% of respondents have taken one or more measures to make their home more energy efficient (e.g., thermal insulation, changing doors and windows or the heating system), but most (63%) have not.

Over the same period, 10% of respondents have received public funds, subsidies or financial help to make their house more sustainable or energy efficient. The large majority (87%), however, has not.

QA8. For each of the following statements, please tell if it applies to you.  
 (% - EU)

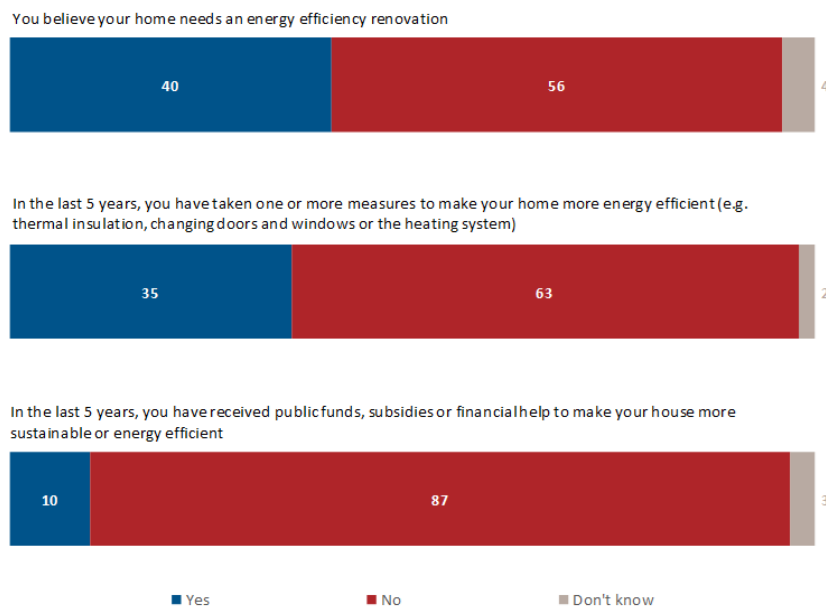

<sup>28</sup> QA8. For each of the following statements, please tell if it applies to you. 8.1 In the last 5 years, you have taken one or more measures to make your home more energy efficient (e.g., thermal insulation, changing doors and windows or the heating system)

8.2 In the last 5 years, you have received public funds, subsidies or financial help to make their house more sustainable or energy efficient.  
 8.3 You believe your home needs an energy efficiency renovation

## Special Eurobarometer 527

### Fairness perceptions of the green transition

In 14 Member States, a majority of respondents believe their home needs an energy efficiency renovation, with this opinion most widespread in Latvia, Malta (both 67%) and Croatia (66%). In contrast, 22% in Austria, 27% in Finland and 29% in Poland think the same way.

**QA8.3** For each of the following statements, please tell if it applies to you.  
(% - You believe your home needs an energy efficiency renovation)

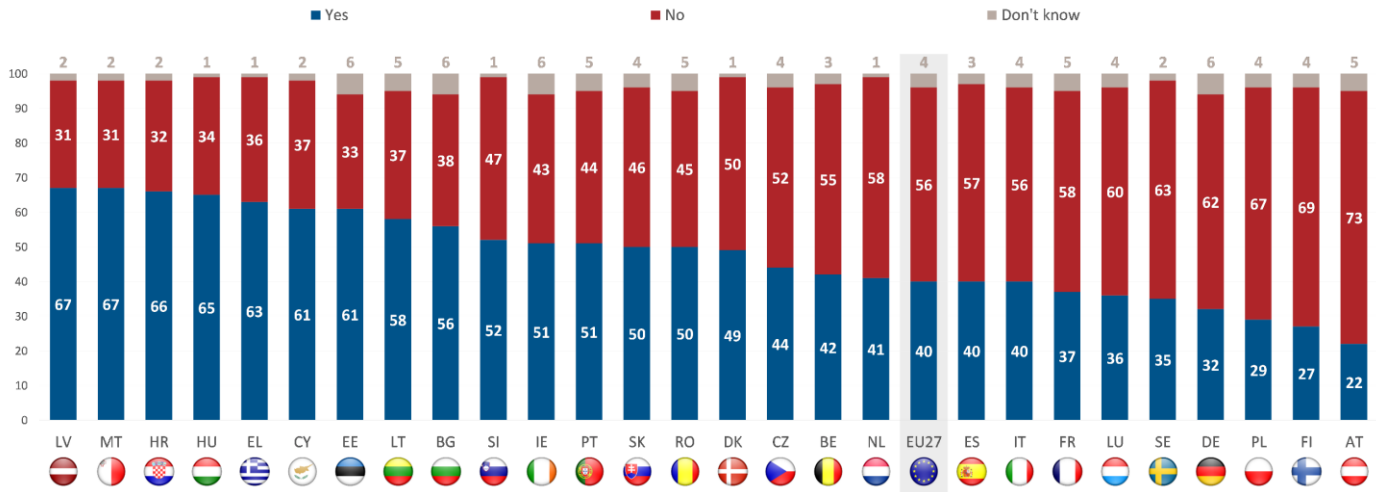

There is also considerable variation at a national level in the proportion who have taken one or more measures in the last five years to make their home more energy efficient, and there are only five countries where the majority has done this: the Netherlands (62%), Malta (60%), Latvia (56%), Slovenia (53%) and Estonia (50%). In contrast, no more than one quarter in Portugal (15%), Italy and Greece (both 25%) have taken such measures.

**QA8.1** For each of the following statements, please tell if it applies to you.  
(% - In the last 5 years, you have taken one or more measures to make your home more energy efficient (e.g. thermal insulation, changing doors and windows or the heating system))

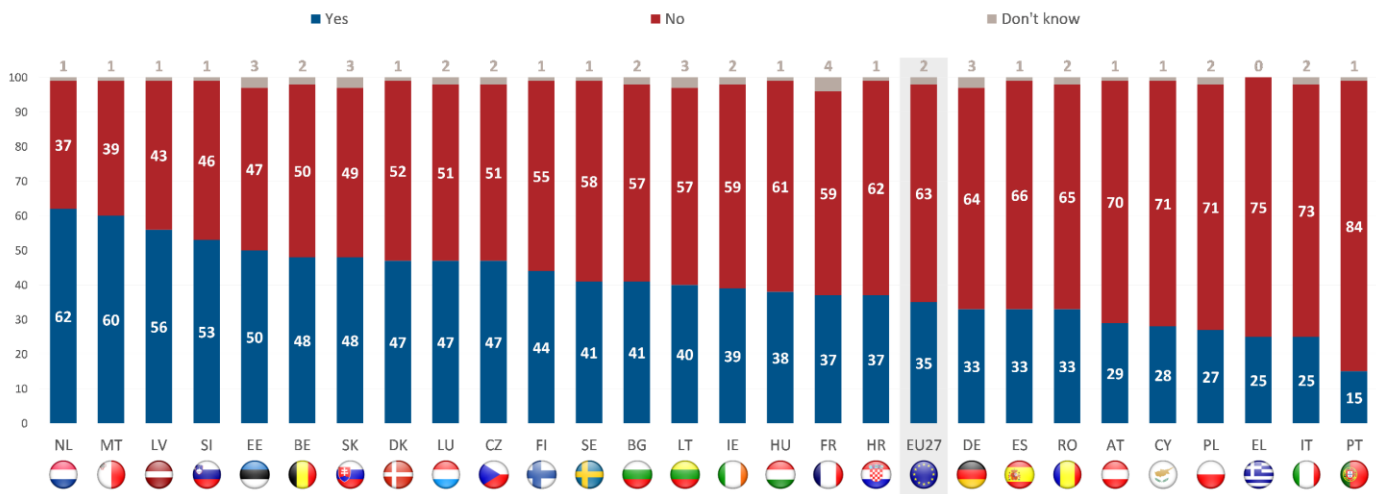

## Special Eurobarometer 527

### Fairness perceptions of the green transition

There are only three countries where at least one in five respondents say that in the last five years they have received public funds, subsidies or financial help to make their house more sustainable or energy-efficient: Malta (31%), the Netherlands (23%) and Luxembourg (20%). In contrast, 3% in Bulgaria, 4% in Greece and 5% in Spain and Portugal say they received this kind of financial assistance.

It is worth noting that there isn't a consistent relationship at a national level between receiving financial assistance and taking energy efficiency measures at home. For example, Malta and Portugal have some of the highest proportions of both making energy efficiency improvements at home and receiving financial assistance to make such changes. However, Estonia and Latvia have some of the highest proportions of respondents who have made energy efficiency improvements at home but some of the lowest levels of receiving financial assistance for such measures.

QA8.2 For each of the following statements, please tell if it applies to you.

(% - In the last 5 years, you have received public funds, subsidies or financial help to make your house more sustainable or energy efficient)

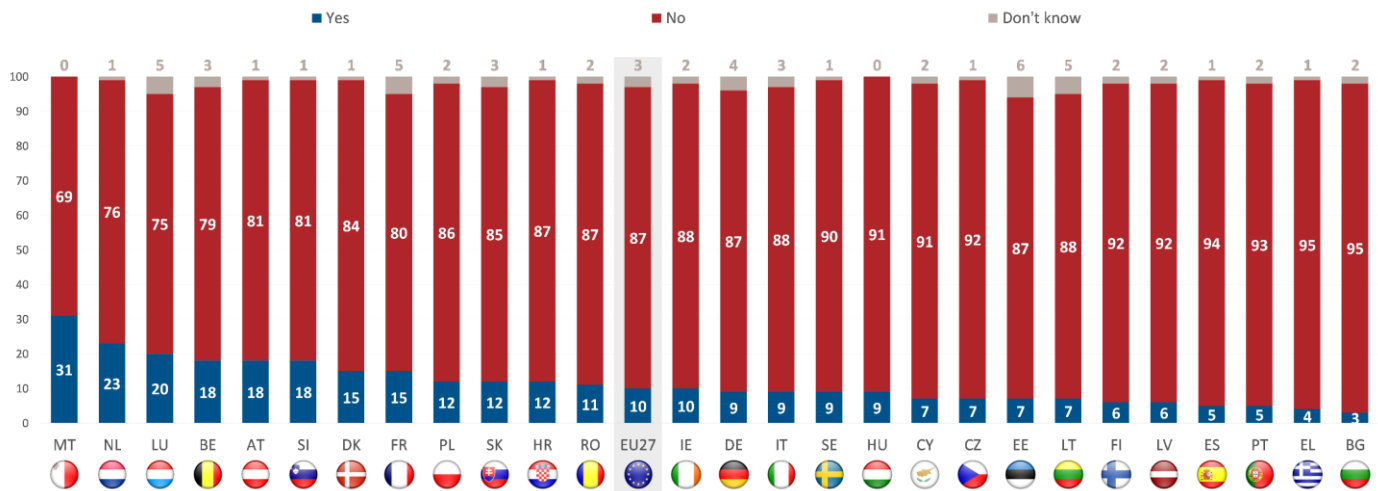

## Special Eurobarometer 527

### Fairness perceptions of the green transition

The **socio-demographic analysis** at EU level illustrates a range of differences, particularly in education level, financial difficulties, employment and tenure status. There are also interesting differences regarding urbanization in the last two statements.

- Respondents with a higher education level are more likely to have taken one or more measures in the last five years to make their home more energy efficient or have received funding for such measures. For example, 44% of those with a university level have taken measures to improve their home's energy efficiency, compared to 19% of those with an education level below secondary or 31% with a secondary level of education.
- The more financial difficulties a respondent experiences, the more likely they are to agree that their home needs an energy efficiency renovation, but the less likely they are to have made such renovations or to have received financial assistance for such changes. For instance, more than half (52%) who have trouble paying bills most of the time say their home needs an energy efficiency renovation, compared to 36% who have the least difficulties.
- The more disposable income a respondent has, the more likely they are to have taken one or more measures in the last five years to make their home more energy efficient or to have received funding for such measures. For instance, 51% in the 5<sup>th</sup> quintile have made their home more energy efficient, compared to 23% in the 1<sup>st</sup> quintile.
- Those living in rural villages are more likely than those in more urbanised areas to have taken one or more measures in the last five years to make their home more energy efficient (39%) or to have received funding for such measures (14%).
- Respondents who are employed with a temporary work agency / an online platform (47%) are more likely than those with other employment statuses to agree that their home needs an energy efficiency renovation, and this is particularly the case when compared to retired persons (36%) or those who are self-employed with employees (37%). The self-employed with employees are, however, the most likely to say they have taken at least one measure to make their home more energy efficient (48%).
- Respondents who live in a house they own with an outstanding mortgage are more likely to have taken energy efficiency measures (48%) or received funding to take such measures (18%) than those who own their home without a mortgage or those who rent.

## Special Eurobarometer 527

### Fairness perceptions of the green transition

**QA8** For each of the following statements, please tell if it applies to you.  
(% - Yes)

|                                                                                                                    | You believe your home needs an energy efficiency renovation | In the last 5 years, you have taken one or more measures to make your home more energy efficient (e.g. thermal insulation, changing doors and windows or the heating system) | In the last 5 years, you have received public funds, subsidies or financial help to make your house more sustainable or energy efficient |
|--------------------------------------------------------------------------------------------------------------------|-------------------------------------------------------------|------------------------------------------------------------------------------------------------------------------------------------------------------------------------------|------------------------------------------------------------------------------------------------------------------------------------------|
| EU27                                                                                                               | 40                                                          | 35                                                                                                                                                                           | 10                                                                                                                                       |
|  <b>Gender</b>                    |                                                             |                                                                                                                                                                              |                                                                                                                                          |
| Man                                                                                                                | 40                                                          | 37                                                                                                                                                                           | 11                                                                                                                                       |
| Woman                                                                                                              | 40                                                          | 33                                                                                                                                                                           | 10                                                                                                                                       |
|  <b>Age</b>                       |                                                             |                                                                                                                                                                              |                                                                                                                                          |
| 15-24                                                                                                              | 36                                                          | 27                                                                                                                                                                           | 7                                                                                                                                        |
| 25-39                                                                                                              | 43                                                          | 35                                                                                                                                                                           | 12                                                                                                                                       |
| 40-54                                                                                                              | 42                                                          | 37                                                                                                                                                                           | 12                                                                                                                                       |
| 55 +                                                                                                               | 38                                                          | 35                                                                                                                                                                           | 10                                                                                                                                       |
|  <b>Difficulties paying bills</b> |                                                             |                                                                                                                                                                              |                                                                                                                                          |
| Most of the time                                                                                                   | 52                                                          | 22                                                                                                                                                                           | 6                                                                                                                                        |
| From time to time                                                                                                  | 45                                                          | 27                                                                                                                                                                           | 9                                                                                                                                        |
| Almost never/ Never                                                                                                | 36                                                          | 39                                                                                                                                                                           | 11                                                                                                                                       |
| <b>Subjective urbanisation</b>                                                                                     |                                                             |                                                                                                                                                                              |                                                                                                                                          |
| Rural village                                                                                                      | 40                                                          | 39                                                                                                                                                                           | 14                                                                                                                                       |
| Small/ mid size town                                                                                               | 39                                                          | 32                                                                                                                                                                           | 10                                                                                                                                       |
| Large town                                                                                                         | 42                                                          | 33                                                                                                                                                                           | 8                                                                                                                                        |
| <b>Image of the EU</b>                                                                                             |                                                             |                                                                                                                                                                              |                                                                                                                                          |
| Total 'Positive'                                                                                                   | 40                                                          | 38                                                                                                                                                                           | 11                                                                                                                                       |
| Neutral                                                                                                            | 40                                                          | 31                                                                                                                                                                           | 10                                                                                                                                       |
| Total 'Negative'                                                                                                   | 40                                                          | 32                                                                                                                                                                           | 9                                                                                                                                        |
| <b>Total disposable income - quintile</b>                                                                          |                                                             |                                                                                                                                                                              |                                                                                                                                          |
| 1st quintile                                                                                                       | 41                                                          | 23                                                                                                                                                                           | 6                                                                                                                                        |
| 2nd quintile                                                                                                       | 45                                                          | 31                                                                                                                                                                           | 10                                                                                                                                       |
| 3rd quintile                                                                                                       | 41                                                          | 38                                                                                                                                                                           | 12                                                                                                                                       |
| 4th quintile                                                                                                       | 42                                                          | 41                                                                                                                                                                           | 13                                                                                                                                       |
| 5th quintile                                                                                                       | 41                                                          | 51                                                                                                                                                                           | 15                                                                                                                                       |
| <b>Employment status</b>                                                                                           |                                                             |                                                                                                                                                                              |                                                                                                                                          |
| Employed on an open ended contract                                                                                 | 41                                                          | 37                                                                                                                                                                           | 11                                                                                                                                       |
| Employed on a short-term contract                                                                                  | 45                                                          | 31                                                                                                                                                                           | 9                                                                                                                                        |
| Employed with a temporary work agency / an online platform                                                         | 47                                                          | 28                                                                                                                                                                           | 16                                                                                                                                       |
| Self-employed without employees                                                                                    | 40                                                          | 43                                                                                                                                                                           | 15                                                                                                                                       |
| Self-employed with employees                                                                                       | 37                                                          | 48                                                                                                                                                                           | 17                                                                                                                                       |
| Unemployed                                                                                                         | 48                                                          | 28                                                                                                                                                                           | 10                                                                                                                                       |
| Retired                                                                                                            | 36                                                          | 34                                                                                                                                                                           | 10                                                                                                                                       |
| Looking after home, inactive                                                                                       | 43                                                          | 27                                                                                                                                                                           | 9                                                                                                                                        |
| Student                                                                                                            | 36                                                          | 25                                                                                                                                                                           | 6                                                                                                                                        |
| Other                                                                                                              | 50                                                          | 44                                                                                                                                                                           | 8                                                                                                                                        |
| <b>What is the highest level of education you completed? (ONE ANSWER ONLY)</b>                                     |                                                             |                                                                                                                                                                              |                                                                                                                                          |
| Below secondary                                                                                                    | 40                                                          | 19                                                                                                                                                                           | 6                                                                                                                                        |
| Secondary                                                                                                          | 40                                                          | 31                                                                                                                                                                           | 9                                                                                                                                        |
| Post secondary                                                                                                     | 38                                                          | 43                                                                                                                                                                           | 13                                                                                                                                       |
| University                                                                                                         | 39                                                          | 44                                                                                                                                                                           | 13                                                                                                                                       |
| <b>Which of the following applies to the place where you live?</b>                                                 |                                                             |                                                                                                                                                                              |                                                                                                                                          |
| Owned by you, your household, without outstanding mortgage                                                         | 39                                                          | 38                                                                                                                                                                           | 11                                                                                                                                       |
| Owned by you, your household, with outstanding mortgage                                                            | 39                                                          | 48                                                                                                                                                                           | 18                                                                                                                                       |
| You, your household are tenants or subtenants paying rent at market price                                          | 41                                                          | 21                                                                                                                                                                           | 5                                                                                                                                        |
| You, your household are tenants or subtenants paying rent at reduced price                                         | 45                                                          | 21                                                                                                                                                                           | 7                                                                                                                                        |
| Your accommodation is provided free, rent free                                                                     | 37                                                          | 32                                                                                                                                                                           | 9                                                                                                                                        |
| <b>Which of the following best describes the area where you live?</b>                                              |                                                             |                                                                                                                                                                              |                                                                                                                                          |
| A big city                                                                                                         | 42                                                          | 33                                                                                                                                                                           | 8                                                                                                                                        |
| The suburbs or outskirts of a big city                                                                             | 38                                                          | 38                                                                                                                                                                           | 12                                                                                                                                       |
| A town or a small city                                                                                             | 39                                                          | 32                                                                                                                                                                           | 10                                                                                                                                       |
| A country village                                                                                                  | 40                                                          | 38                                                                                                                                                                           | 14                                                                                                                                       |
| A farm or home in the countryside                                                                                  | 45                                                          | 47                                                                                                                                                                           | 13                                                                                                                                       |

## Cost is the main barrier to making energy efficiency work

Respondents were asked about the obstacles to making their home more energy efficient and could give a maximum of three answers.<sup>29</sup> Considering all their responses show that cost is the main barrier, with 43% saying making their home more energy efficient is too expensive, and they cannot afford it. The only other answers given by at least one in five respondents are that they do not have sufficient information (28%) or that it is too expensive, but they could afford it (21%).

More than one in ten say it is difficult to find qualified people to make these changes or that it is difficult to agree with the landlord (both 16%), while 15% say it is difficult to find the necessary energy-saving materials and equipment on the market. Almost one in ten (9%) say it is difficult to agree with the neighbours. Almost one in five (19%) say there are no particular obstacles to making their home more energy efficient, while more than one in twenty (7%) say they don't know.

Looking just at the first reason given by respondents shows the rank order of reasons is the same, with 31% saying it is too expensive and they can't afford it, 13% that they don't have sufficient information, and 12% that it is too expensive, but they could afford it.

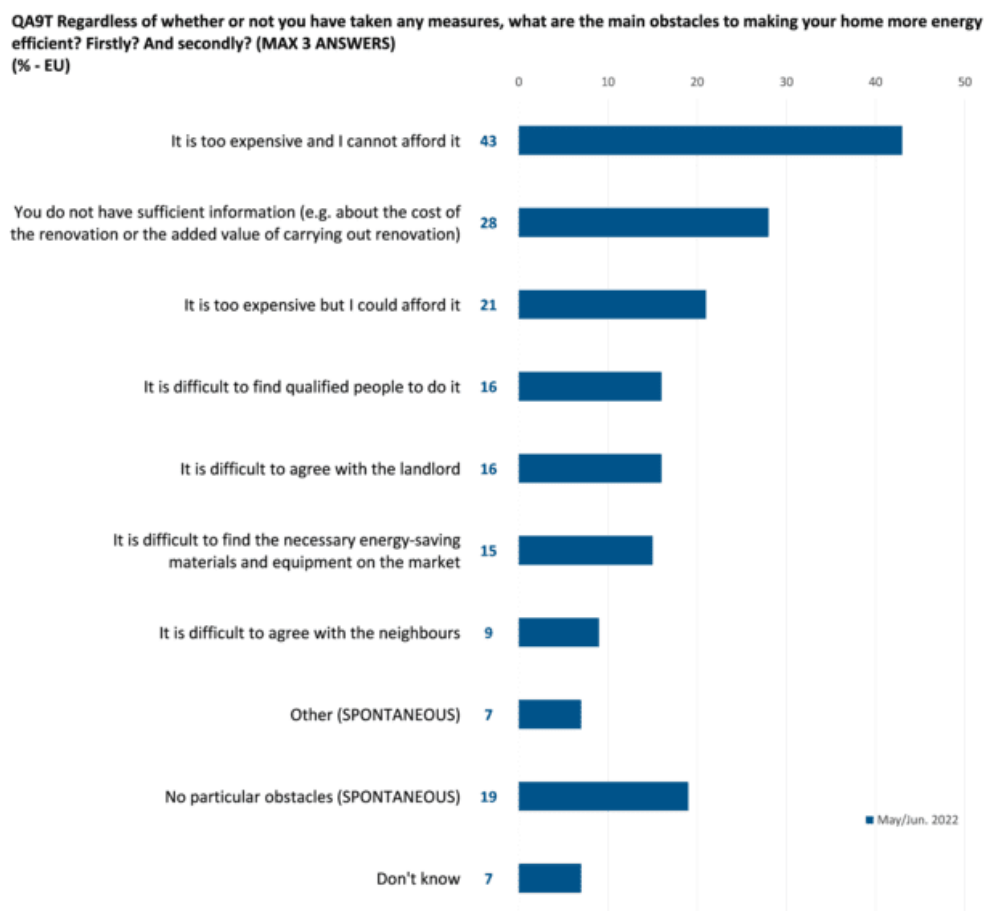

<sup>29</sup> QA9T. Regardless of whether or not you have taken any measures, what are the main obstacles to making your home more energy efficient? Firstly? And secondly?



## Special Eurobarometer 527

### Fairness perceptions of the green transition

In 22 countries, respondents most often say the main obstacle to making their home more energy efficient is that they could not afford the expense, with the highest proportions seen in Greece (73%), Cyprus (69%), Croatia (61%) and Hungary (60%) and the lowest in Luxembourg (26%).

In Sweden (48%), Belgium (41%), Denmark (37%) and the Netherlands (35%), respondents most often say these improvements are expensive, but they could afford them, while in Finland, opinion is evenly divided between these two options (both 39%).

**QA9T** Regardless of whether or not you have taken any measures, what are the main obstacles to making your home more energy efficient? Firstly? And secondly? (MAX. 3 ANSWERS)  
(% - The most mentioned answer by country)

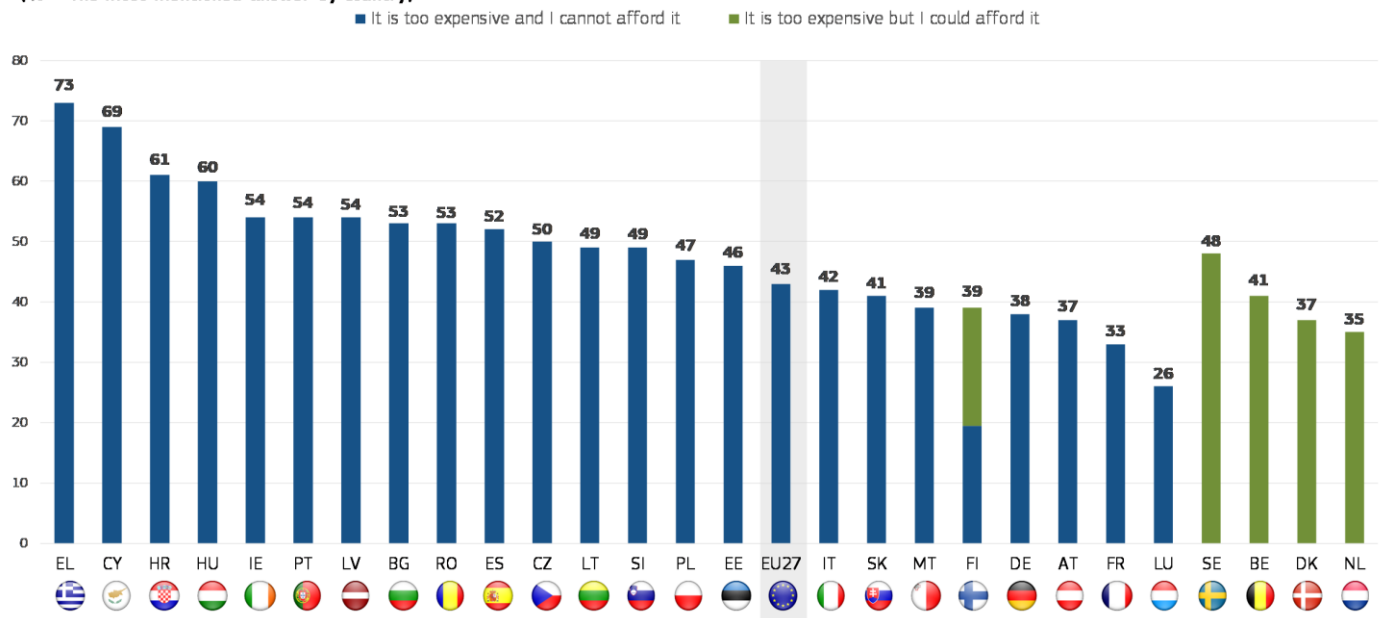

## Special Eurobarometer 527

### Fairness perceptions of the green transition

The **socio-demographic analysis** at EU level illustrates several differences among respondents, especially regarding the affordability of making one's home more energy efficient. For example, there are striking differences in education levels, financial difficulties and household situations.

- The higher the level of education of respondents, the more likely they are to say it is too expensive, but they could afford it, and the less likely they are to say it is too expensive and they cannot afford it. For example, 32% of those with a university level of education say they cannot afford it, compared to 53% of those with an education level below secondary.
- Unemployed persons (57%) are the most likely to say it is too expensive and they cannot afford it, particularly compared to the self-employed with employees (26%). Respondents employed with a temporary work agency / an online platform are the most likely to say it is difficult to agree with the landlord (39%), and along with the self-employed without employees (24% and 23% respectively), they are also the most likely to say it is difficult to find qualified people to do the work.
- Respondents living in a single household with children are more likely than those living in other household types to say they cannot afford it (51%) or that it is difficult to agree with the landlord (25%).
- The fewer financial difficulties a respondent experiences, the more likely they are to say it is too expensive, but they can afford it or that it is difficult to find qualified people or the necessary materials and equipment, and the less likely they are to say they cannot afford it or that it is difficult to agree with the landlord. For example, 66% who have difficulties paying their bills most of the time say they cannot afford it, compared to 36% who rarely have this problem.
- The more disposable income a respondent has, the less likely they are to say they cannot afford it or that it is difficult to agree with the landlord, and the more likely they are to give each of the other reasons. The exception is difficulty agreeing with neighbours, where there is no difference.
- The more urbanised a respondent's environment, the more likely they are to say it is difficult to agree with the landlord. In addition, those living in rural villages are more likely than those living in towns to say it is too expensive and they can (25%) or cannot afford it (48%).
- Homeowners (either with or without a mortgage) are more likely than renters to say they don't have sufficient information, it's too expensive, but they could afford it, or that it is difficult to find qualified people or the necessary materials and equipment.

## Special Eurobarometer 527

### Fairness perceptions of the green transition

**QA9T** Regardless of whether or not you have taken any measures, what are the main obstacles to making your home more energy efficient? Firstly? And secondly?  
(% - EU)

|                                                                                                                    | It is too expensive and I cannot afford it | It is too expensive but I could afford it | It is difficult to find qualified people to do it | It is difficult to find the necessary energy-saving materials and equipment on the market | You do not have sufficient information (e.g. about the cost of the renovation or the added value of carrying out renovation) | It is difficult to agree with the landlord | It is difficult to agree with the neighbours | Other (SPONTANEOUS) | No particular obstacles (SPONTANEOUS) | Don't know |
|--------------------------------------------------------------------------------------------------------------------|--------------------------------------------|-------------------------------------------|---------------------------------------------------|-------------------------------------------------------------------------------------------|------------------------------------------------------------------------------------------------------------------------------|--------------------------------------------|----------------------------------------------|---------------------|---------------------------------------|------------|
| EU27                                                                                                               | 43                                         | 21                                        | 16                                                | 15                                                                                        | 28                                                                                                                           | 16                                         | 9                                            | 7                   | 19                                    | 7          |
|  <b>Gender</b>                    |                                            |                                           |                                                   |                                                                                           |                                                                                                                              |                                            |                                              |                     |                                       |            |
| Man                                                                                                                | 41                                         | 22                                        | 17                                                | 16                                                                                        | 28                                                                                                                           | 16                                         | 10                                           | 7                   | 20                                    | 6          |
| Woman                                                                                                              | 45                                         | 20                                        | 16                                                | 14                                                                                        | 29                                                                                                                           | 16                                         | 9                                            | 8                   | 18                                    | 8          |
|  <b>Household situation</b>       |                                            |                                           |                                                   |                                                                                           |                                                                                                                              |                                            |                                              |                     |                                       |            |
| Single Household without children                                                                                  | 43                                         | 18                                        | 13                                                | 12                                                                                        | 28                                                                                                                           | 20                                         | 9                                            | 8                   | 19                                    | 10         |
| Single Household with children                                                                                     | 51                                         | 16                                        | 14                                                | 11                                                                                        | 23                                                                                                                           | 25                                         | 9                                            | 8                   | 16                                    | 9          |
| Multiple Household without children                                                                                | 43                                         | 22                                        | 19                                                | 17                                                                                        | 29                                                                                                                           | 13                                         | 9                                            | 8                   | 20                                    | 5          |
| Household with children                                                                                            | 42                                         | 24                                        | 18                                                | 18                                                                                        | 30                                                                                                                           | 12                                         | 11                                           | 6                   | 19                                    | 4          |
|  <b>Difficulties paying bills</b> |                                            |                                           |                                                   |                                                                                           |                                                                                                                              |                                            |                                              |                     |                                       |            |
| Most of the time                                                                                                   | 66                                         | 14                                        | 11                                                | 9                                                                                         | 25                                                                                                                           | 22                                         | 10                                           | 8                   | 17                                    | 8          |
| From time to time                                                                                                  | 54                                         | 19                                        | 15                                                | 15                                                                                        | 31                                                                                                                           | 20                                         | 11                                           | 6                   | 13                                    | 6          |
| Almost never/ Never                                                                                                | 36                                         | 22                                        | 18                                                | 16                                                                                        | 28                                                                                                                           | 14                                         | 9                                            | 8                   | 22                                    | 7          |
| <b>Total disposable income - quintile</b>                                                                          |                                            |                                           |                                                   |                                                                                           |                                                                                                                              |                                            |                                              |                     |                                       |            |
| 1st quintile                                                                                                       | 53                                         | 17                                        | 11                                                | 10                                                                                        | 24                                                                                                                           | 27                                         | 8                                            | 10                  | 16                                    | 10         |
| 2nd quintile                                                                                                       | 49                                         | 19                                        | 15                                                | 13                                                                                        | 31                                                                                                                           | 20                                         | 10                                           | 7                   | 17                                    | 5          |
| 3rd quintile                                                                                                       | 46                                         | 22                                        | 17                                                | 16                                                                                        | 30                                                                                                                           | 16                                         | 10                                           | 7                   | 18                                    | 4          |
| 4th quintile                                                                                                       | 40                                         | 24                                        | 19                                                | 20                                                                                        | 32                                                                                                                           | 13                                         | 10                                           | 6                   | 17                                    | 4          |
| 5th quintile                                                                                                       | 30                                         | 26                                        | 24                                                | 22                                                                                        | 35                                                                                                                           | 9                                          | 9                                            | 5                   | 20                                    | 3          |
| <b>Employment status</b>                                                                                           |                                            |                                           |                                                   |                                                                                           |                                                                                                                              |                                            |                                              |                     |                                       |            |
| Employed on an open ended contract                                                                                 | 41                                         | 22                                        | 18                                                | 18                                                                                        | 29                                                                                                                           | 17                                         | 11                                           | 6                   | 18                                    | 5          |
| Employed on a short-term contract                                                                                  | 49                                         | 20                                        | 17                                                | 15                                                                                        | 31                                                                                                                           | 23                                         | 9                                            | 7                   | 14                                    | 4          |
| Employed with a temporary work agency / an online                                                                  | 40                                         | 20                                        | 24                                                | 20                                                                                        | 35                                                                                                                           | 29                                         | 9                                            | 4                   | 10                                    | 1          |
| Self-employed without employees                                                                                    | 39                                         | 22                                        | 23                                                | 18                                                                                        | 31                                                                                                                           | 14                                         | 9                                            | 7                   | 19                                    | 4          |
| Self-employed with employees                                                                                       | 26                                         | 25                                        | 18                                                | 19                                                                                        | 27                                                                                                                           | 13                                         | 11                                           | 8                   | 26                                    | 6          |
| Unemployed                                                                                                         | 57                                         | 17                                        | 11                                                | 10                                                                                        | 24                                                                                                                           | 22                                         | 9                                            | 10                  | 18                                    | 8          |
| Retired                                                                                                            | 44                                         | 21                                        | 16                                                | 12                                                                                        | 27                                                                                                                           | 12                                         | 8                                            | 9                   | 23                                    | 8          |
| Looking after home, inactive                                                                                       | 54                                         | 16                                        | 12                                                | 14                                                                                        | 27                                                                                                                           | 16                                         | 8                                            | 7                   | 18                                    | 11         |
| Student                                                                                                            | 38                                         | 18                                        | 11                                                | 14                                                                                        | 30                                                                                                                           | 19                                         | 8                                            | 7                   | 17                                    | 15         |
| Other                                                                                                              | 52                                         | 21                                        | 5                                                 | 12                                                                                        | 22                                                                                                                           | 16                                         | 5                                            | 16                  | 31                                    | 2          |
| <b>What is the highest level of education you completed? (ONE ANSWER ONLY)</b>                                     |                                            |                                           |                                                   |                                                                                           |                                                                                                                              |                                            |                                              |                     |                                       |            |
| Below secondary                                                                                                    | 53                                         | 17                                        | 9                                                 | 8                                                                                         | 29                                                                                                                           | 11                                         | 6                                            | 9                   | 24                                    | 15         |
| Secondary                                                                                                          | 47                                         | 20                                        | 16                                                | 16                                                                                        | 28                                                                                                                           | 17                                         | 9                                            | 6                   | 17                                    | 7          |
| Post secondary                                                                                                     | 39                                         | 21                                        | 14                                                | 14                                                                                        | 29                                                                                                                           | 16                                         | 10                                           | 9                   | 23                                    | 7          |
| University                                                                                                         | 32                                         | 23                                        | 20                                                | 17                                                                                        | 31                                                                                                                           | 14                                         | 10                                           | 8                   | 22                                    | 4          |
| <b>Which of the following applies to the place where you live?</b>                                                 |                                            |                                           |                                                   |                                                                                           |                                                                                                                              |                                            |                                              |                     |                                       |            |
| Owned by you, your household, without outstanding mortgage                                                         | 45                                         | 24                                        | 20                                                | 17                                                                                        | 30                                                                                                                           | 4                                          | 10                                           | 5                   | 21                                    | 7          |
| Owned by you, your household, with outstanding mortgage                                                            | 40                                         | 25                                        | 20                                                | 20                                                                                        | 33                                                                                                                           | 4                                          | 11                                           | 6                   | 21                                    | 4          |
| You, your household are tenants or subtenants paying rent at market price                                          | 43                                         | 14                                        | 9                                                 | 10                                                                                        | 23                                                                                                                           | 44                                         | 7                                            | 10                  | 17                                    | 8          |
| You, your household are tenants or subtenants paying rent at reduced price                                         | 39                                         | 14                                        | 11                                                | 10                                                                                        | 23                                                                                                                           | 35                                         | 8                                            | 14                  | 13                                    | 11         |
| Your accommodation is provided free, rent free                                                                     | 51                                         | 22                                        | 20                                                | 18                                                                                        | 32                                                                                                                           | 12                                         | 12                                           | 7                   | 12                                    | 5          |
| <b>Which of the following best describes the area where you live?</b>                                              |                                            |                                           |                                                   |                                                                                           |                                                                                                                              |                                            |                                              |                     |                                       |            |
| A big city                                                                                                         | 41                                         | 19                                        | 15                                                | 14                                                                                        | 30                                                                                                                           | 22                                         | 13                                           | 8                   | 18                                    | 6          |
| The suburbs or outskirts of a big city                                                                             | 42                                         | 19                                        | 20                                                | 17                                                                                        | 29                                                                                                                           | 12                                         | 7                                            | 8                   | 21                                    | 7          |
| A town or a small city                                                                                             | 42                                         | 20                                        | 16                                                | 15                                                                                        | 29                                                                                                                           | 16                                         | 9                                            | 7                   | 20                                    | 8          |
| A country village                                                                                                  | 48                                         | 25                                        | 18                                                | 17                                                                                        | 25                                                                                                                           | 12                                         | 7                                            | 7                   | 18                                    | 7          |
| A farm or home in the countryside                                                                                  | 50                                         | 30                                        | 20                                                | 23                                                                                        | 35                                                                                                                           | 9                                          | 1                                            | 7                   | 13                                    | 4          |

## 2. Sustainable mobility

A car is still the main mode of transport for a majority of respondents. Nearly half of the respondents use sustainable modes of transport.

On a typical day, a car is the main mode of transport for most respondents (47%).<sup>30</sup> Around one in five (21%) say walking is their main mode, while 16% say it is public transport. A privately owned bike or scooter is mentioned by 8%, while 2% say their main mode is a privately owned moped or motorbike and the same proportion use a shared bike, scooter or moped. Just 1% say a non-urban train is the main mode of daily transport.

There has been little change in the daily mode of transport since September 2019, with the most notable a slight increase in the proportion who mention walking (+4 percentage points) and a decrease in the proportion who mention a car (-5).

QA11 On a typical day, what is your main mode of transport? By main mode, we mean the one that you use most often. (% - EU)

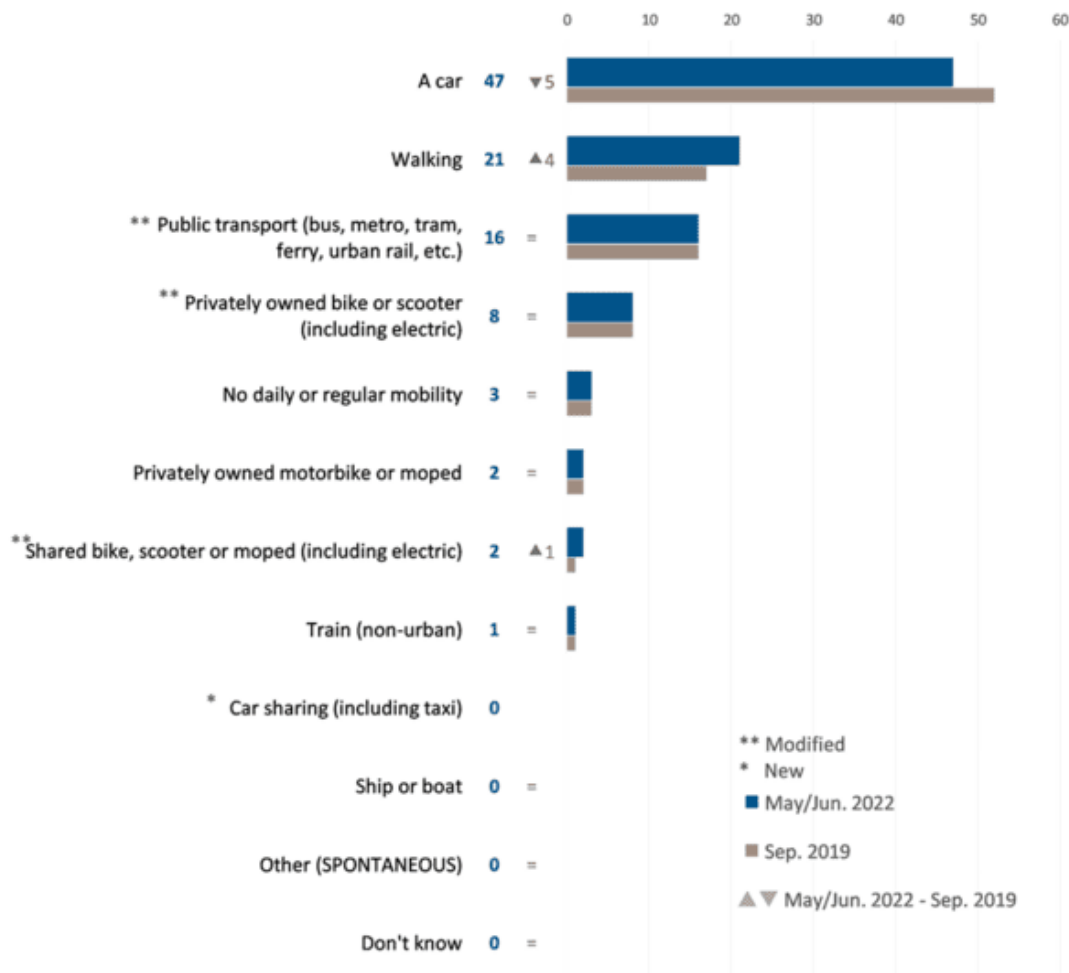

<sup>30</sup> QA11. On a typical day, what is your main mode of transport? By main mode, we mean the one that you use most often.

## Special Eurobarometer 527

### Fairness perceptions of the green transition

In all but three Member States, a car is the most common mode of daily transport, with the highest proportions seen in Cyprus (85%), Ireland (76%) and Malta (69%). A car is least mentioned in Romania (26%), Bulgaria (35%) and Sweden (37%). In Romania (40%) and Bulgaria (36%), walking is the most mentioned mode of daily transport. In the Netherlands, the car and a private bike or scooter rank equal first (39% each).

**QA11 On a typical day, what is your main mode of transport? By main mode, we mean the one that you use most often.**  
 (%- The most mentioned answer by country)

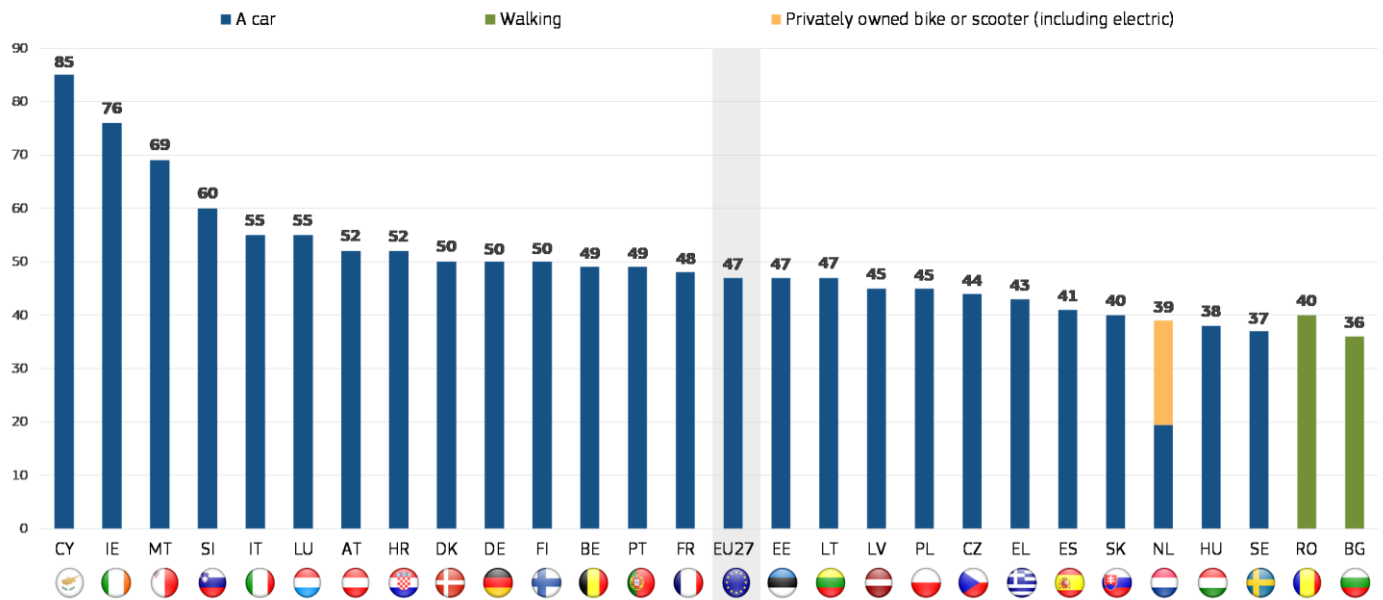

## Special Eurobarometer 527

### Fairness perceptions of the green transition

In ten countries, at least one in five say their main mode of daily transport is **public transport**, with the largest proportions in Hungary (25%), Luxembourg (24%) and Slovakia and Poland (both 22%). At the other end of the scale, 2% in Cyprus, 4% in the Netherlands and 7% in Ireland and Slovenia mention public transport. The Netherlands (39%) is the only country where at least one in five say a **private bike or scooter** is their main mode of daily transport, followed by 17% in Sweden and 16% in Belgium and Denmark. Just 1% in Portugal and Cyprus mention a private bike or scooter.

Italy (6%) and Greece (5%) are the only countries where at least one in twenty mentions a **privately owned moped or motorbike**, and Denmark (11%) is the only country where at least one in twenty mentions a **shared bike, scooter or moped**. Compared to September 2019, respondents in 20 countries are now less likely to say a **car** is their main mode of daily transport, with the largest

declines seen in Slovenia (60%, -11), Luxembourg (55%, -10) and France (48%, -9) and Romania (26%, -9). Mentions of a car have increased in six countries, including Ireland (76%, +8), and there has been no change in Croatia.

In 23 countries, respondents are now more likely compared to September 2019, to say **walking** is their main mode of daily transport, and this is particularly the case in Romania (40%, +10), Lithuania (21%, +8), Slovenia (16%, +7) and the Netherlands (12%, +7). Mentions of walking have declined in three countries and have remained unchanged in Latvia.

The only other notable changes since 2019 are declines in the mention of **public transport** in Malta (13%, -8), Czechia (21%, -7), Lithuania (19%, -7), Croatia (12%, -6), Romania (18%, -5) and Ireland (7%, -5).

QA11 On a typical day, what is your main mode of transport? By main mode, we mean the one that you use most often.  
(%)

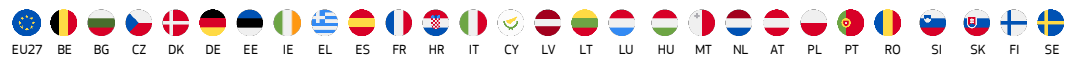

|                                                              |               | EU27 | BE | BG | CZ | DK | DE | EE | IE | EL | ES | FR | HR | IT | CY | LV | LT | LU  | HU | MT | NL | AT | PL | PT | RO  | SI  | SK | FI | SE |
|--------------------------------------------------------------|---------------|------|----|----|----|----|----|----|----|----|----|----|----|----|----|----|----|-----|----|----|----|----|----|----|-----|-----|----|----|----|
| A car                                                        | May/June 2022 | 47   | 49 | 35 | 44 | 50 | 50 | 47 | 76 | 43 | 41 | 48 | 52 | 55 | 85 | 45 | 47 | 55  | 38 | 69 | 39 | 52 | 45 | 49 | 26  | 60  | 40 | 50 | 37 |
|                                                              | Δ Sept 2019   | ▼5   | ▼5 | ▼1 | ▲4 | ▼8 | ▼8 | ▼4 | ▲8 | ▼2 | ▼1 | ▼9 | =  | ▼2 | ▼4 | ▲3 | ▼1 | ▼10 | ▲2 | ▲4 | ▼3 | ▼5 | ▲2 | ▼5 | ▼9  | ▼11 | ▼5 | ▼7 | ▼3 |
| Walking                                                      | May/June 2022 | 21   | 8  | 36 | 23 | 10 | 15 | 19 | 11 | 26 | 31 | 22 | 20 | 19 | 9  | 23 | 21 | 11  | 17 | 11 | 12 | 10 | 19 | 20 | 40  | 16  | 27 | 21 | 20 |
|                                                              | Δ Sept 2019   | ▲4   | ▼1 | ▲2 | ▲2 | ▲3 | ▲4 | ▲1 | ▼4 | ▲4 | ▲1 | ▲4 | ▲1 | ▲5 | ▲4 | =  | ▲8 | ▲4  | ▼2 | ▲2 | ▲7 | ▲2 | ▲2 | ▲3 | ▲10 | ▲7  | ▲2 | ▲5 | ▲2 |
| Public transport (bus, metro, tram, ferry, urban rail, etc.) | May/June 2022 | 16   | 18 | 20 | 21 | 8  | 15 | 21 | 7  | 20 | 19 | 16 | 12 | 11 | 2  | 18 | 19 | 24  | 25 | 13 | 4  | 18 | 22 | 21 | 18  | 7   | 22 | 11 | 20 |
|                                                              | Δ Sept 2019   | =    | ▲1 | ▼3 | ▼7 | ▲2 | ▲2 | ▼2 | ▼5 | ▼2 | =  | =  | ▼6 | =  | ▼1 | ▼5 | ▼7 | ▲3  | ▲4 | ▼8 | =  | ▲3 | ▲1 | ▼1 | ▼5  | =   | ▲3 | =  | ▲3 |
| Privately owned bike or scooter (including electric)         | May/June 2022 | 8    | 16 | 2  | 6  | 15 | 16 | 4  | 2  | 0  | 2  | 5  | 7  | 4  | 1  | 7  | 5  | 4   | 11 | 0  | 39 | 10 | 3  | 1  | 3   | 5   | 6  | 13 | 17 |
|                                                              | Δ Sept 2019   | =    | ▲4 | =  | =  | ▲3 | ▲1 | =  | ▲1 | ▼2 | =  | ▲2 | ▲1 | =  | ▲1 | ▼1 | =  | ▲2  | ▼3 | ▼2 | ▼2 | ▲2 | ▼4 | ▲1 | ▼1  | ▲1  | =  | =  | ▼4 |
| Shared bike, scooter or moped (including electric)           | May/June 2022 | 2    | 2  | 0  | 1  | 11 | 0  | 2  | 0  | 2  | 1  | 2  | 1  | 3  | 0  | 1  | 1  | 2   | 3  | 0  | 1  | 1  | 3  | 1  | 2   | 4   | 1  | 0  | 1  |
|                                                              | Δ Sept 2019   | ▲1   | ▲1 | ▼1 | =  | ▼1 | =  | ▲1 | =  | ▲1 | =  | ▲1 | ▼1 | ▲1 | =  | =  | =  | ▲1  | ▲1 | =  | ▲1 | =  | =  | ▲1 | ▼1  | ▲2  | =  | =  | ▲1 |
| Privately owned motorbike or moped                           | May/June 2022 | 2    | 1  | 1  | 0  | 0  | 1  | 0  | 0  | 5  | 2  | 1  | 2  | 6  | 1  | 1  | 0  | 1   | 2  | 2  | 1  | 3  | 1  | 2  | 2   | 1   | 1  | 1  | 1  |
|                                                              | Δ Sept 2019   | =    | =  | =  | =  | ▼1 | =  | =  | =  | ▼2 | ▼1 | ▼1 | ▲1 | ▼2 | ▼1 | =  | =  | ▲1  | =  | ▲1 | ▼1 | =  | =  | =  | ▲2  | =   | ▲1 | ▼1 | =  |
| Train (non-urban)                                            | May/June 2022 | 1    | 2  | 0  | 1  | 2  | 1  | 0  | 0  | 0  | 1  | 1  | 1  | 0  | 0  | 1  | 0  | 1   | 0  | 0  | 2  | 2  | 1  | 0  | 1   | 0   | 1  | 0  | 2  |
|                                                              | Δ Sept 2019   | =    | ▼2 | =  | ▼1 | =  | =  | ▼1 | ▼1 | =  | =  | =  | ▲1 | =  | =  | ▲1 | =  | ▼2  | ▼1 | =  | ▼3 | ▼1 | =  | ▼1 | ▲1  | ▼1  | ▼1 | ▼1 | ▼1 |
| Car sharing (including taxi)                                 | May/June 2022 | 0    | 1  | 1  | 1  | 0  | 0  | 2  | 2  | 3  | 1  | 1  | 2  | 0  | 1  | 0  | 1  | 1   | 1  | 3  | 0  | 1  | 1  | 1  | 2   | 2   | 1  | 1  | 0  |
|                                                              | Δ Sept 2019   | =    | =  | =  | =  | =  | =  | =  | =  | =  | =  | =  | =  | =  | =  | =  | =  | =   | =  | =  | =  | =  | =  | =  | =   | =   | =  | =  | =  |
| Ship or boat                                                 | May/June 2022 | 0    | 0  | 0  | 0  | 0  | 0  | 0  | 0  | 0  | 0  | 0  | 0  | 0  | 0  | 0  | 0  | 0   | 0  | 0  | 0  | 0  | 0  | 0  | 0   | 0   | 0  | 0  | 0  |
|                                                              | Δ Sept 2019   | =    | =  | =  | =  | =  | =  | =  | =  | =  | =  | =  | =  | =  | =  | =  | =  | =   | =  | =  | =  | =  | =  | =  | =   | =   | =  | =  | =  |
| No daily or regular mobility                                 | May/June 2022 | 3    | 3  | 4  | 3  | 4  | 2  | 5  | 2  | 1  | 2  | 4  | 3  | 2  | 1  | 4  | 5  | 1   | 3  | 2  | 2  | 3  | 5  | 5  | 6   | 4   | 1  | 3  | 2  |
|                                                              | Δ Sept 2019   | =    | ▲1 | ▲1 | ▲1 | ▲3 | ▲1 | ▲3 | =  | =  | =  | ▲2 | ▲1 | ▼2 | =  | ▲2 | ▼2 | =   | ▼2 | =  | ▲2 | ▼2 | ▼1 | ▲1 | ▲1  | ▼1  | ▼1 | ▲3 | ▲2 |
| Other (SPONTANEOUS)                                          | May/June 2022 | 0    | 0  | 0  | 0  | 0  | 0  | 0  | 0  | 0  | 0  | 0  | 0  | 0  | 0  | 0  | 1  | 0   | 0  | 0  | 0  | 0  | 0  | 0  | 0   | 1   | 0  | 0  | 0  |
|                                                              | Δ Sept 2019   | =    | =  | =  | =  | ▼1 | =  | =  | ▼1 | =  | =  | =  | =  | =  | =  | =  | ▲1 | =   | =  | =  | ▼1 | =  | =  | =  | =   | ▲1  | =  | =  | =  |
| Don't know                                                   | May/June 2022 | 0    | 0  | 1  | 0  | 0  | 0  | 0  | 0  | 0  | 0  | 0  | 0  | 0  | 0  | 0  | 0  | 0   | 0  | 0  | 0  | 0  | 0  | 0  | 0   | 0   | 0  | 0  | 0  |
|                                                              | Δ Sept 2019   | =    | =  | ▲1 | =  | =  | =  | =  | =  | =  | =  | =  | =  | =  | =  | =  | =  | =   | =  | =  | =  | =  | =  | ▼1 | =   | =   | =  | =  | =  |

## Special Eurobarometer 527

### Fairness perceptions of the green transition

Results from the **socio-demographic analysis at EU level** show several differences among respondents. For example, respondents who are more likely to use public transport or walk are women, young respondents, those with lower levels of education, or those with financial difficulties.

- Men (51%) are more likely than women (41%) to use a car as their main mode of daily transport, while women (25%) are more likely than men (16%) to say they walk. Furthermore, women (18%) are more likely to say they take public transport compared to men (13%).
- Respondents aged 25-54 are more likely than other age groups to use a car as their main mode of transport and are less likely to walk. Those aged 15-25 (35%) are more likely than older age groups to say public transport is their main mode, while those aged 55+ (29%) are more likely than other age groups to say walking is their main mode of daily transport.
- Respondents with high levels of education are more likely to use a car as their main mode of daily transport. For example, 53% of those with a post-secondary level use a car as their main mode of transport, compared to 26% of those with an education level below secondary.
- Respondents who are self-employed with employees are the most likely to use a car (67%), particularly compared to house persons (33%) and retired persons (34%). House persons (41%) are the most likely to say walking is their main mode of transport.
- Respondents who experience the most financial difficulties are more likely to mention walking (26%) or public transport (21%) and less likely to mention a car (36%) than those with fewer difficulties.
- The more disposable income a respondent has, the more likely they are to say their main mode is a car, and the less likely they are to say it is walking. For example, 31% in the 1<sup>st</sup> quintile mention walking, compared to 10% in the 5<sup>th</sup> quintile.
- Perhaps not surprisingly, respondents living in large towns are the most likely to mention public transport (33%) and the least likely to mention a car (32%).
- Car owners are less likely to mention walking as a daily mode of transport compared to respondents who do not own a car.



## Special Eurobarometer 527

### Fairness perceptions of the green transition

**QA11** On a typical day, what is your main mode of transport? By main mode, we mean the one that you use most often.  
(% - EU)

|                                                                                                                      | A car | Car sharing (including taxi) | Privately owned motorbike or moped | Train (non-urban) | Ship or boat | Public transport (bus, metro, tram, ferry, urban rail, etc.) | Privately owned bike or scooter (including electric) | Shared bike, scooter or moped (including electric) | Walking | No daily or regular mobility | Other (SPONTANEOUS) | Don't know |
|----------------------------------------------------------------------------------------------------------------------|-------|------------------------------|------------------------------------|-------------------|--------------|--------------------------------------------------------------|------------------------------------------------------|----------------------------------------------------|---------|------------------------------|---------------------|------------|
| EU27                                                                                                                 | 47    | 0                            | 2                                  | 1                 | 0            | 16                                                           | 8                                                    | 2                                                  | 21      | 3                            | 0                   | 0          |
|  <b>Gender</b>                      |       |                              |                                    |                   |              |                                                              |                                                      |                                                    |         |                              |                     |            |
| Man                                                                                                                  | 53    | 1                            | 3                                  | 1                 | 0            | 13                                                           | 9                                                    | 2                                                  | 16      | 2                            | 0                   | 0          |
| Woman                                                                                                                | 41    | 1                            | 1                                  | 1                 | 0            | 18                                                           | 8                                                    | 1                                                  | 25      | 4                            | 0                   | 0          |
|  <b>Age</b>                         |       |                              |                                    |                   |              |                                                              |                                                      |                                                    |         |                              |                     |            |
| 15-24                                                                                                                | 23    | 1                            | 4                                  | 1                 | 0            | 35                                                           | 11                                                   | 4                                                  | 20      | 1                            | 0                   | 0          |
| 25-39                                                                                                                | 56    | 1                            | 2                                  | 1                 | 0            | 14                                                           | 9                                                    | 2                                                  | 13      | 2                            | 0                   | 0          |
| 40-54                                                                                                                | 60    | 1                            | 2                                  | 1                 | 0            | 13                                                           | 7                                                    | 1                                                  | 14      | 1                            | 0                   | 0          |
| 55 +                                                                                                                 | 41    | 1                            | 1                                  | 0                 | 0            | 13                                                           | 8                                                    | 2                                                  | 29      | 5                            | 0                   | 0          |
|  <b>Household situation</b>         |       |                              |                                    |                   |              |                                                              |                                                      |                                                    |         |                              |                     |            |
| Single Household without children                                                                                    | 33    | 1                            | 2                                  | 1                 | 0            | 23                                                           | 9                                                    | 2                                                  | 25      | 4                            | 0                   | 0          |
| Single Household with children                                                                                       | 45    | 0                            | 2                                  | 1                 | 0            | 16                                                           | 8                                                    | 1                                                  | 22      | 4                            | 1                   | 0          |
| Multiple Household without children                                                                                  | 50    | 1                            | 1                                  | 1                 | 0            | 12                                                           | 8                                                    | 2                                                  | 22      | 3                            | 0                   | 0          |
| Household with children                                                                                              | 62    | 0                            | 2                                  | 1                 | 0            | 11                                                           | 8                                                    | 1                                                  | 13      | 2                            | 0                   | 0          |
|  <b>Difficulties paying bills</b> |       |                              |                                    |                   |              |                                                              |                                                      |                                                    |         |                              |                     |            |
| Most of the time                                                                                                     | 36    | 1                            | 3                                  | 0                 | 0            | 21                                                           | 6                                                    | 1                                                  | 26      | 5                            | 1                   | 0          |
| From time to time                                                                                                    | 46    | 1                            | 2                                  | 1                 | 0            | 16                                                           | 6                                                    | 2                                                  | 23      | 3                            | 0                   | 0          |
| Almost never/ Never                                                                                                  | 48    | 1                            | 1                                  | 1                 | 0            | 15                                                           | 10                                                   | 2                                                  | 19      | 3                            | 0                   | 0          |
| <b>Total disposable income - quintile</b>                                                                            |       |                              |                                    |                   |              |                                                              |                                                      |                                                    |         |                              |                     |            |
| 1st quintile                                                                                                         | 30    | 0                            | 2                                  | 1                 | 0            | 20                                                           | 8                                                    | 2                                                  | 31      | 6                            | 0                   | 0          |
| 2nd quintile                                                                                                         | 45    | 1                            | 1                                  | 1                 | 0            | 13                                                           | 9                                                    | 2                                                  | 25      | 3                            | 0                   | 0          |
| 3rd quintile                                                                                                         | 50    | 1                            | 1                                  | 1                 | 0            | 14                                                           | 10                                                   | 1                                                  | 20      | 2                            | 0                   | 0          |
| 4th quintile                                                                                                         | 56    | 1                            | 1                                  | 1                 | 0            | 14                                                           | 9                                                    | 2                                                  | 14      | 2                            | 0                   | 0          |
| 5th quintile                                                                                                         | 57    | 1                            | 2                                  | 1                 | 0            | 15                                                           | 11                                                   | 2                                                  | 10      | 1                            | 0                   | 0          |
| <b>Employment status</b>                                                                                             |       |                              |                                    |                   |              |                                                              |                                                      |                                                    |         |                              |                     |            |
| Employed on an open ended contract                                                                                   | 62    | 1                            | 2                                  | 1                 | 0            | 14                                                           | 8                                                    | 1                                                  | 10      | 1                            | 0                   | 0          |
| Employed on a short-term contract                                                                                    | 49    | 0                            | 3                                  | 1                 | 0            | 17                                                           | 12                                                   | 2                                                  | 16      | 0                            | 0                   | 0          |
| Employed with a temporary work agency / an online platform                                                           | 51    | 3                            | 2                                  | 4                 | 1            | 19                                                           | 8                                                    | 4                                                  | 6       | 2                            | 0                   | 0          |
| Self-employed without employees                                                                                      | 60    | 1                            | 4                                  | 1                 | 0            | 10                                                           | 8                                                    | 1                                                  | 14      | 1                            | 0                   | 0          |
| Self-employed with employees                                                                                         | 67    | 1                            | 1                                  | 3                 | 1            | 6                                                            | 4                                                    | 3                                                  | 10      | 3                            | 1                   | 0          |
| Unemployed                                                                                                           | 37    | 1                            | 2                                  | 0                 | 0            | 16                                                           | 7                                                    | 2                                                  | 32      | 3                            | 0                   | 0          |
| Retired                                                                                                              | 34    | 1                            | 1                                  | 0                 | 0            | 13                                                           | 8                                                    | 2                                                  | 34      | 7                            | 0                   | 0          |
| Looking after home, inactive                                                                                         | 33    | 0                            | 1                                  | 0                 | 0            | 13                                                           | 5                                                    | 1                                                  | 41      | 6                            | 0                   | 0          |
| Student                                                                                                              | 16    | 1                            | 5                                  | 2                 | 0            | 39                                                           | 13                                                   | 4                                                  | 19      | 1                            | 0                   | 0          |
| Other                                                                                                                | 53    | 0                            | 5                                  | 0                 | 0            | 13                                                           | 10                                                   | 1                                                  | 15      | 0                            | 3                   | 0          |
| <b>What is the highest level of education you completed? (ONE ANSWER ONLY)</b>                                       |       |                              |                                    |                   |              |                                                              |                                                      |                                                    |         |                              |                     |            |
| Below secondary                                                                                                      | 26    | 1                            | 1                                  | 0                 | 0            | 12                                                           | 4                                                    | 1                                                  | 44      | 11                           | 0                   | 0          |
| Secondary                                                                                                            | 46    | 1                            | 2                                  | 1                 | 0            | 16                                                           | 8                                                    | 2                                                  | 21      | 3                            | 0                   | 0          |
| Post secondary                                                                                                       | 53    | 1                            | 2                                  | 1                 | 0            | 14                                                           | 8                                                    | 2                                                  | 17      | 2                            | 0                   | 0          |
| University                                                                                                           | 51    | 1                            | 2                                  | 1                 | 0            | 17                                                           | 11                                                   | 1                                                  | 14      | 2                            | 0                   | 0          |
| <b>Which of the following best describes the area where you live?</b>                                                |       |                              |                                    |                   |              |                                                              |                                                      |                                                    |         |                              |                     |            |
| A big city                                                                                                           | 32    | 1                            | 2                                  | 1                 | 0            | 33                                                           | 9                                                    | 2                                                  | 19      | 1                            | 0                   | 0          |
| The suburbs or outskirts of a big city                                                                               | 50    | 0                            | 2                                  | 1                 | 0            | 18                                                           | 9                                                    | 1                                                  | 16      | 3                            | 0                   | 0          |
| A town or a small city                                                                                               | 50    | 1                            | 2                                  | 1                 | 0            | 10                                                           | 9                                                    | 2                                                  | 23      | 2                            | 0                   | 0          |
| A country village                                                                                                    | 54    | 1                            | 1                                  | 1                 | 0            | 7                                                            | 7                                                    | 2                                                  | 21      | 6                            | 0                   | 0          |
| A farm or home in the countryside                                                                                    | 80    | 2                            | 0                                  | 0                 | 0            | 3                                                            | 4                                                    | 0                                                  | 7       | 4                            | 0                   | 0          |
| <b>Do you have a car?</b>                                                                                            |       |                              |                                    |                   |              |                                                              |                                                      |                                                    |         |                              |                     |            |
| Yes, diesel                                                                                                          | 70    | 1                            | 1                                  | 0                 | 0            | 7                                                            | 5                                                    | 1                                                  | 13      | 2                            | 0                   | 0          |
| Yes, petrol                                                                                                          | 62    | 1                            | 1                                  | 1                 | 0            | 9                                                            | 8                                                    | 2                                                  | 15      | 1                            | 0                   | 0          |
| Yes, hybrid                                                                                                          | 64    | 1                            | 2                                  | 1                 | 0            | 11                                                           | 8                                                    | 2                                                  | 9       | 2                            | 0                   | 0          |
| Yes, electric                                                                                                        | 65    | 2                            | 0                                  | 0                 | 1            | 9                                                            | 9                                                    | 1                                                  | 10      | 3                            | 0                   | 0          |
| Yes, other                                                                                                           | 52    | 1                            | 7                                  | 2                 | 1            | 8                                                            | 8                                                    | 1                                                  | 14      | 6                            | 0                   | 0          |
| No, cannot afford                                                                                                    | 5     | 1                            | 2                                  | 1                 | 0            | 36                                                           | 12                                                   | 4                                                  | 34      | 5                            | 0                   | 0          |
| No, other reason                                                                                                     | 5     | 1                            | 3                                  | 1                 | 0            | 33                                                           | 11                                                   | 2                                                  | 37      | 7                            | 0                   | 0          |

## Special Eurobarometer 527

### Fairness perceptions of the green transition

The majority of respondents in urban areas consider the quality of public transport as good in terms of quality, availability and affordability. Satisfaction with public transport is much lower in rural areas.

Among respondents, satisfaction with the quality of public transport is generally higher than satisfaction with affordability and availability, as illustrated in the graph below.

Six in ten (60%) respondents rate the quality of public transport in the area where they live as good, with 12% saying it is “very good”.<sup>31</sup> Around three in ten (31%) rate the quality as bad, with 9% saying it is “very bad”. Almost one in ten (9%) say they don’t know.

The majority (55%) also rates the quality of public transport availability as good, with 13% rating it as “very good”. Almost four in ten (39%) rate availability as bad, with 13% saying it is “very bad”. Nearly one in ten (9%) say they don’t know.

More than half (54%) rate the affordability of public transport in their area as good, with 11% saying it is “very good”. Almost four in ten (38%) rate affordability as bad, with 11% saying it is “very bad”. Fewer than one in ten (8%) say they don’t know.

**QA12. How would you rate the quality of public transport in the area where you live?**  
(% - EU)

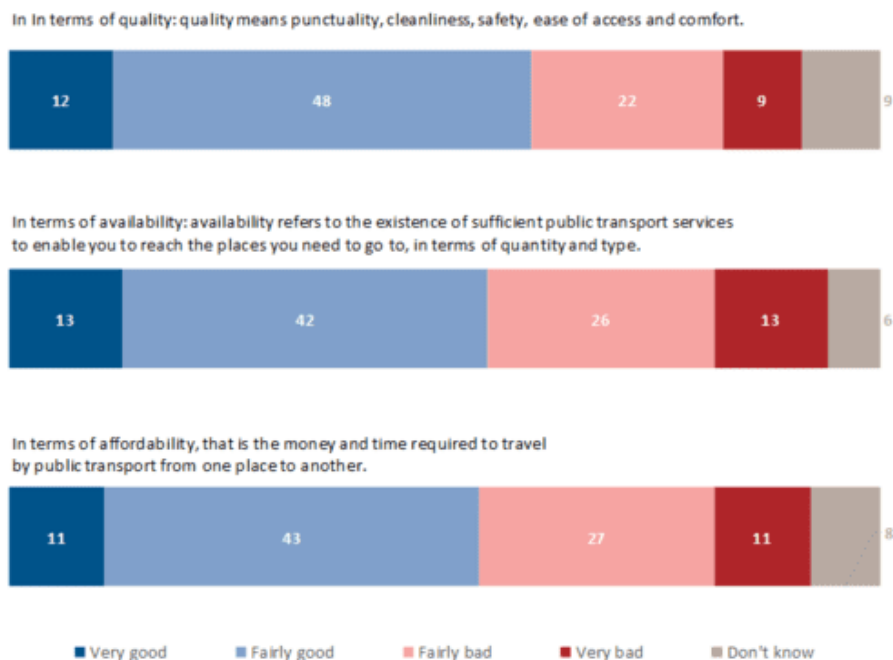

<sup>31</sup> QA12 How would you rate the quality of public transport in the area where you live? 12.1 In terms of availability: availability refers to the existence of sufficient public transport services to enable you to reach the places you need to go to, in terms of quantity and type.

12.2 In terms of affordability, that is the money and time required to travel by public transport from one place to another. 12.3 In terms of quality: quality means punctuality, cleanliness, safety, ease of access and comfort.

## Special Eurobarometer 527

### Fairness perceptions of the green transition

In all but one country, a majority of respondents say the quality of public transport in their area is good, although proportions range from 82% in Luxembourg, 80% in Czechia and 75% in the Netherlands to 45% in Cyprus (vs 44% 'bad'), 50% in Italy and 52% in Croatia. In six countries, at least one in five say the quality is "very good": Sweden, Luxembourg (both 27%), Czechia (25%), Austria (24%), Estonia (23%) and the Netherlands (20%).

The exception is Greece, where 44% say the quality of public transport in their area is good and 54% say it is bad.

Once again, there is a high level of "don't know" responses in France (25%).

QA12.3 How would you rate the quality of public transport in the area where you live? In terms of quality: quality means punctuality, cleanliness, safety, ease of access and comfort.  
(% - EU27)

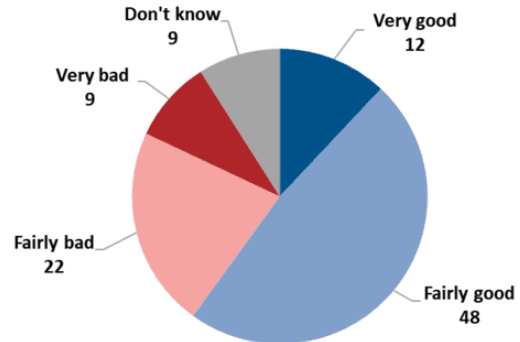

(May/Jun. 2022)

QA12.3 How would you rate the quality of public transport in the area where you live? :In terms of quality: quality means punctuality, cleanliness, safety, ease of access and comfort.  
(%)

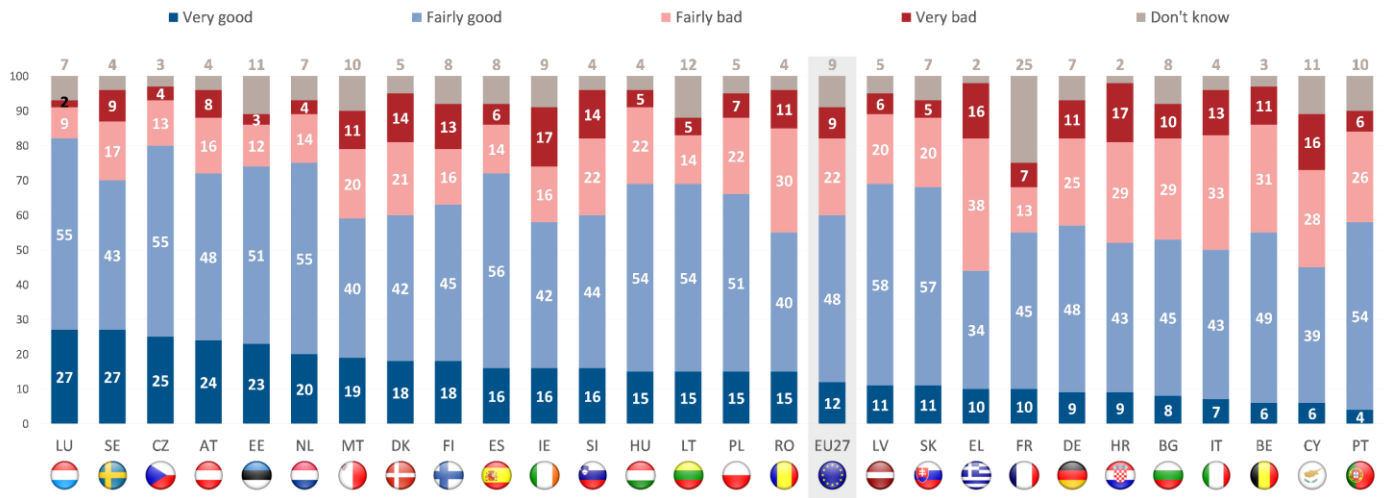

## Special Eurobarometer 527

### Fairness perceptions of the green transition

In 22 countries, the majority of respondents rate the availability of public transport in their area as good, with the highest proportions in Luxembourg (76%), Czechia (73%) and Hungary (71%). In Italy, the proportion rating availability as good or bad are equal (both 48%).

In Sweden (30%), Luxembourg (27%), Czechia (25%), the Netherlands and Estonia (both 21%), at least one in five rate availability as "very good".

In the remaining four countries, only a minority rates the availability of public transport in their area as good: Greece (39%), Cyprus (40%), Portugal (45%) and Finland (48%).

**QA12.1 How would you rate the quality of public transport in the area where you live?**  
In terms of availability: availability refers to the existence of sufficient public transport services to enable you to reach the places you need to go to, in terms of quantity and type.  
(% - EU27)

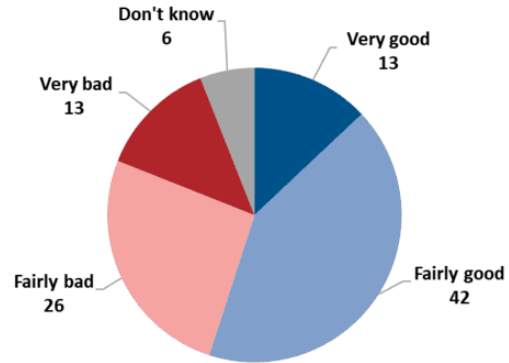

(May / Jun. 2022)

**QA12.1 How would you rate the quality of public transport in the area where you live?**

(% - In terms of availability: availability refers to the existence of sufficient public transport services to enable you to reach the places you need to go to, in terms of quantity and type.)

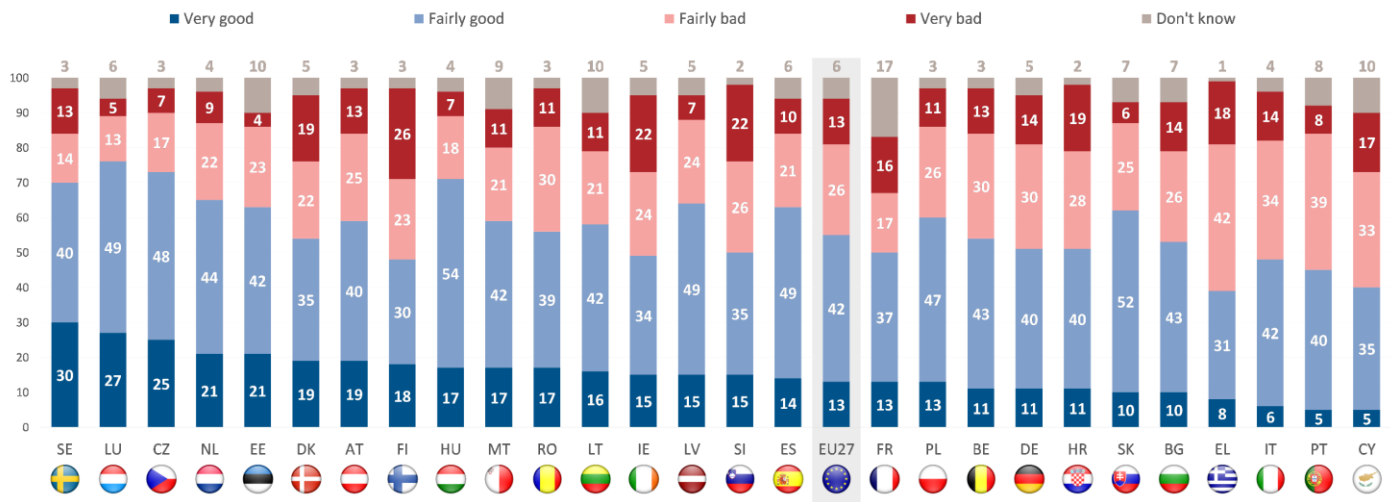

## Special Eurobarometer 527

### Fairness perceptions of the green transition

Respondents in Luxembourg (93%) are much more likely to say the affordability of public transport in their area is good than in other countries. In fact, in Luxembourg, the majority (61%) rates affordability as “very good” – the only country where more than six in ten say this.

There are 25 countries where the majority rates affordability as good, with proportions ranging from 93% in Luxembourg, 74% in Czechia and 72% in Estonia to 46% in Portugal (vs 44% bad), 48% in Cyprus (vs 37% bad) and 49% in Denmark (vs 46% bad). In Germany (43%) and the Netherlands (46%), only a minority rate affordability as good.

It is worth noting one quarter (25%) of respondents in France say they don't know.

Taking a broader view of the results show, respondents in Luxembourg and Czechia are consistently the most likely to rate each aspect of local public transport as good, while those in Cyprus are consistently among the most likely to rate each aspect as bad.

QA12.2 How would you rate the quality of public transport in the area where you live?

In terms of affordability, that is the money and time required to travel by public transport from one place to another.  
(% - EU27)

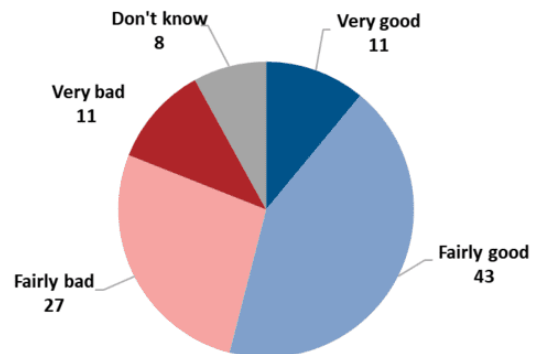

(May/Jun. 2022)

QA12.2 How would you rate the quality of public transport in the area where you live?

(% - In terms of affordability, that is the money and time required to travel by public transport from one place to another.)

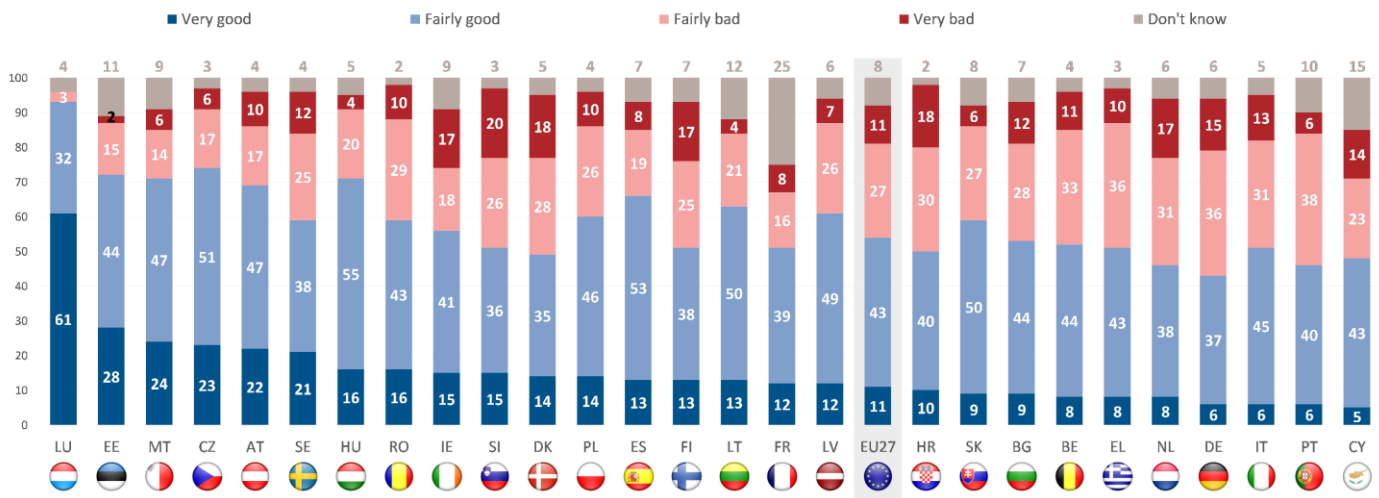

## Special Eurobarometer 527

### Fairness perceptions of the green transition

Results of the **socio-demographic analysis at EU level** illustrate several differences among respondents, especially regarding age, education levels, income and urbanization.

- Those aged 15-24 are more likely than older respondents to rate the quality (64%), affordability (59%) and availability (62%) of their local public transport as “good”.
- Respondents with a high level of education are more likely to rate the quality, affordability and availability of their local public transport as good. For example, 58% of respondents with either a post-secondary or university level of education rate the availability of their local public transport as ‘good’, compared to 54% of those with a secondary level of education and 47% of those with a level below secondary.
- The fewer financial difficulties a respondent experiences, the more likely they are to rate each aspect of local public transport as good. For instance, 56% with the least difficulties rate availability as good, compared to 46% of those with the most difficulties.
- The more disposable income a respondent has, the more likely they are to say the affordability of local transport is good: 58% in the 5<sup>th</sup> quintile say this, compared to 48% in the 1<sup>st</sup> quintile.
- The more urbanised a respondent’s environment, the more likely they are to rate each aspect as good. The largest difference is seen in availability, with 75% in large towns saying this is good compared to 35% in rural villages. It is also worth noting that those living in big cities are more likely than those living in the suburbs or outskirts of a big city to rate each aspect of their public transport as good. For example, 75% living in a big city rate availability as good, compared to 59% living in the suburbs or outskirts of a big city.

## Special Eurobarometer 527

### Fairness perceptions of the green transition

**QA12** How would you rate the quality of public transport in the area where you live?  
(% - Total 'Good')

|                                                                                                                     | In terms of quality: quality means punctuality, cleanliness, safety, ease of access and comfort. | In terms of availability: availability refers to the existence of sufficient public transport services to enable you to reach the places you need to go to, in terms of quantity and type. | In terms of affordability: that is the money and time required to travel by public transport from one place to another. |
|---------------------------------------------------------------------------------------------------------------------|--------------------------------------------------------------------------------------------------|--------------------------------------------------------------------------------------------------------------------------------------------------------------------------------------------|-------------------------------------------------------------------------------------------------------------------------|
| EU27                                                                                                                | 60                                                                                               | 55                                                                                                                                                                                         | 54                                                                                                                      |
|  <b>Gender</b>                     |                                                                                                  |                                                                                                                                                                                            |                                                                                                                         |
| Man                                                                                                                 | 59                                                                                               | 53                                                                                                                                                                                         | 54                                                                                                                      |
| Woman                                                                                                               | 60                                                                                               | 56                                                                                                                                                                                         | 53                                                                                                                      |
|  <b>Age</b>                        |                                                                                                  |                                                                                                                                                                                            |                                                                                                                         |
| 15-24                                                                                                               | 64                                                                                               | 62                                                                                                                                                                                         | 59                                                                                                                      |
| 25-39                                                                                                               | 61                                                                                               | 55                                                                                                                                                                                         | 54                                                                                                                      |
| 40-54                                                                                                               | 59                                                                                               | 53                                                                                                                                                                                         | 51                                                                                                                      |
| 55 +                                                                                                                | 59                                                                                               | 53                                                                                                                                                                                         | 54                                                                                                                      |
|  <b>Difficulties paying bills</b> |                                                                                                  |                                                                                                                                                                                            |                                                                                                                         |
| Most of the time                                                                                                    | 50                                                                                               | 46                                                                                                                                                                                         | 43                                                                                                                      |
| From time to time                                                                                                   | 56                                                                                               | 53                                                                                                                                                                                         | 51                                                                                                                      |
| Almost never/ Never                                                                                                 | 62                                                                                               | 56                                                                                                                                                                                         | 56                                                                                                                      |
| <b>Image of the EU</b>                                                                                              |                                                                                                  |                                                                                                                                                                                            |                                                                                                                         |
| Total 'Positive'                                                                                                    | 64                                                                                               | 58                                                                                                                                                                                         | 57                                                                                                                      |
| Neutral                                                                                                             | 59                                                                                               | 54                                                                                                                                                                                         | 53                                                                                                                      |
| Total 'Negative'                                                                                                    | 50                                                                                               | 45                                                                                                                                                                                         | 44                                                                                                                      |
| <b>Total disposable income - quintile</b>                                                                           |                                                                                                  |                                                                                                                                                                                            |                                                                                                                         |
| 1st quintile                                                                                                        | 57                                                                                               | 54                                                                                                                                                                                         | 48                                                                                                                      |
| 2nd quintile                                                                                                        | 61                                                                                               | 54                                                                                                                                                                                         | 53                                                                                                                      |
| 3rd quintile                                                                                                        | 60                                                                                               | 54                                                                                                                                                                                         | 53                                                                                                                      |
| 4th quintile                                                                                                        | 61                                                                                               | 53                                                                                                                                                                                         | 51                                                                                                                      |
| 5th quintile                                                                                                        | 62                                                                                               | 58                                                                                                                                                                                         | 58                                                                                                                      |
| <b>Employment status</b>                                                                                            |                                                                                                  |                                                                                                                                                                                            |                                                                                                                         |
| Employed on an open ended contract                                                                                  | 61                                                                                               | 55                                                                                                                                                                                         | 54                                                                                                                      |
| Employed on a short-term contract                                                                                   | 63                                                                                               | 58                                                                                                                                                                                         | 51                                                                                                                      |
| Employed with a temporary work agency / an online platform                                                          | 63                                                                                               | 57                                                                                                                                                                                         | 58                                                                                                                      |
| Self-employed without employees                                                                                     | 58                                                                                               | 52                                                                                                                                                                                         | 53                                                                                                                      |
| Self-employed with employees                                                                                        | 55                                                                                               | 54                                                                                                                                                                                         | 52                                                                                                                      |
| Unemployed                                                                                                          | 55                                                                                               | 52                                                                                                                                                                                         | 46                                                                                                                      |
| Retired                                                                                                             | 60                                                                                               | 54                                                                                                                                                                                         | 54                                                                                                                      |
| Looking after home, inactive                                                                                        | 51                                                                                               | 45                                                                                                                                                                                         | 43                                                                                                                      |
| Student                                                                                                             | 66                                                                                               | 64                                                                                                                                                                                         | 61                                                                                                                      |
| Other                                                                                                               | 65                                                                                               | 53                                                                                                                                                                                         | 45                                                                                                                      |
| <b>Which of the following best describes the area where you live?</b>                                               |                                                                                                  |                                                                                                                                                                                            |                                                                                                                         |
| A big city                                                                                                          | 71                                                                                               | 75                                                                                                                                                                                         | 67                                                                                                                      |
| The suburbs or outskirts of a big city                                                                              | 62                                                                                               | 59                                                                                                                                                                                         | 56                                                                                                                      |
| A town or a small city                                                                                              | 59                                                                                               | 53                                                                                                                                                                                         | 53                                                                                                                      |
| A country village                                                                                                   | 49                                                                                               | 36                                                                                                                                                                                         | 41                                                                                                                      |
| A farm or home in the countryside                                                                                   | 33                                                                                               | 19                                                                                                                                                                                         | 28                                                                                                                      |
| <b>Do you have a car?</b>                                                                                           |                                                                                                  |                                                                                                                                                                                            |                                                                                                                         |
| Yes, diesel                                                                                                         | 56                                                                                               | 48                                                                                                                                                                                         | 40                                                                                                                      |
| Yes, petrol                                                                                                         | 59                                                                                               | 53                                                                                                                                                                                         | 47                                                                                                                      |
| Yes, hybrid                                                                                                         | 63                                                                                               | 52                                                                                                                                                                                         | 41                                                                                                                      |
| Yes, electric                                                                                                       | 62                                                                                               | 52                                                                                                                                                                                         | 50                                                                                                                      |
| Yes, other                                                                                                          | 55                                                                                               | 58                                                                                                                                                                                         | 59                                                                                                                      |
| No, cannot afford                                                                                                   | 64                                                                                               | 62                                                                                                                                                                                         | 56                                                                                                                      |
| No, other reason                                                                                                    | 64                                                                                               | 65                                                                                                                                                                                         | 60                                                                                                                      |

## Special Eurobarometer 527

### Fairness perceptions of the green transition

#### More frequent and more affordable public transport are the main things that would help respondents choose more sustainable transport

Respondents were asked what would help them most to adopt a more sustainable mode of transport.<sup>32</sup> More frequent public transport (36%) was most mentioned, followed by more affordable public transport (29%).

At least one in five mentions faster public transport (23%), new or better designed public transport routes (21%) or more and safer bicycle lanes (20%). Almost as many respondents mention closer public transport stops (19%).

At least one in ten say better interconnectivity between public and private modes of transport (16%), less polluted and less congested streets (16%), more pedestrian-friendly streets (14%) or more affordable electric bikes (13%) would most help them to adopt more sustainable transport.

Almost one in ten (8%) say improved car-sharing options would help them the most.

QA13 From the following list, which aspects would help you the most to adopt a more sustainable transport mode? (MAX. 3 ANSWERS)  
(% - EU)

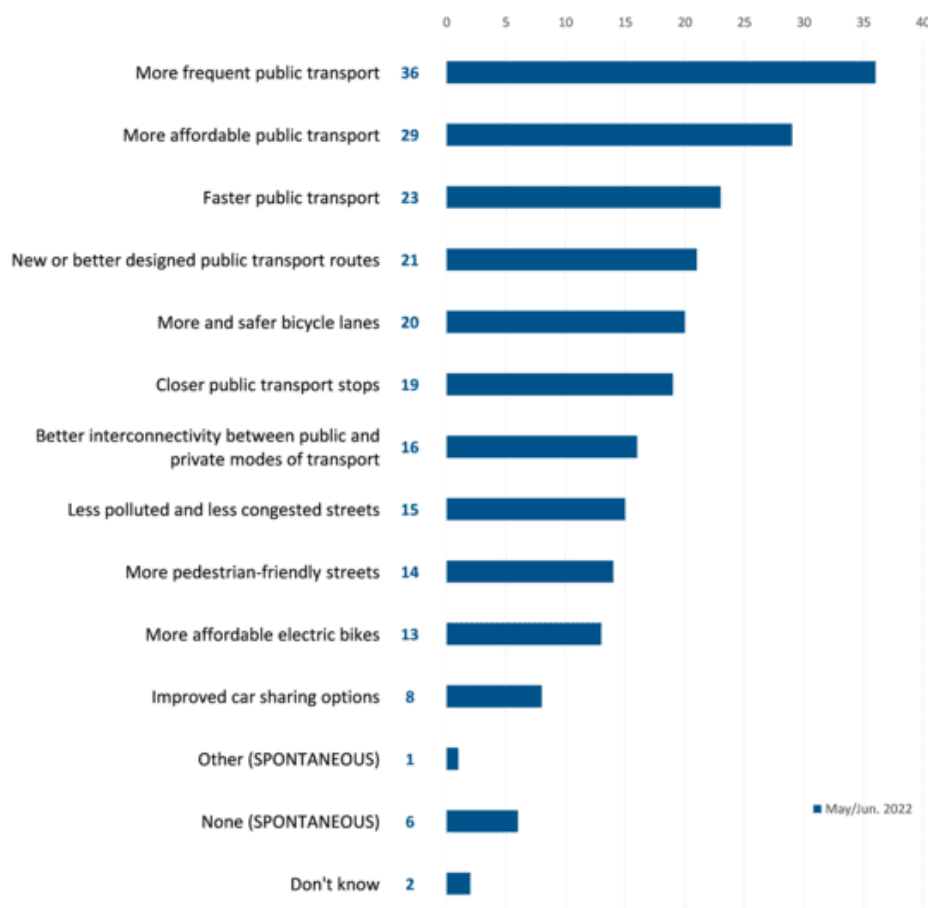

<sup>32</sup> QA13. From the following list, which aspects would help you the most to adopt a more sustainable transport mode? (MAX. 3 ANSWERS)



## Special Eurobarometer 527

### Fairness perceptions of the green transition

In 21 countries, respondents are most likely to say more frequent public transport would most help them adopt a more sustainable mode of transport, with the largest proportions seen in Greece (54%), Portugal (49%) and Spain (44%) and the lowest in Denmark and Latvia (both 30%).

In five countries, including Sweden (51%) and the Netherlands (45%), more affordable public transport is the most mentioned answer, while in Estonia, (33%) of respondents most often say new or better-designed public transport routes would help them adopt more sustainable transport.

**QA13 From the following list, which aspects would help you the most to adopt a more sustainable transport mode?**  
( % The most mentioned answer by country )

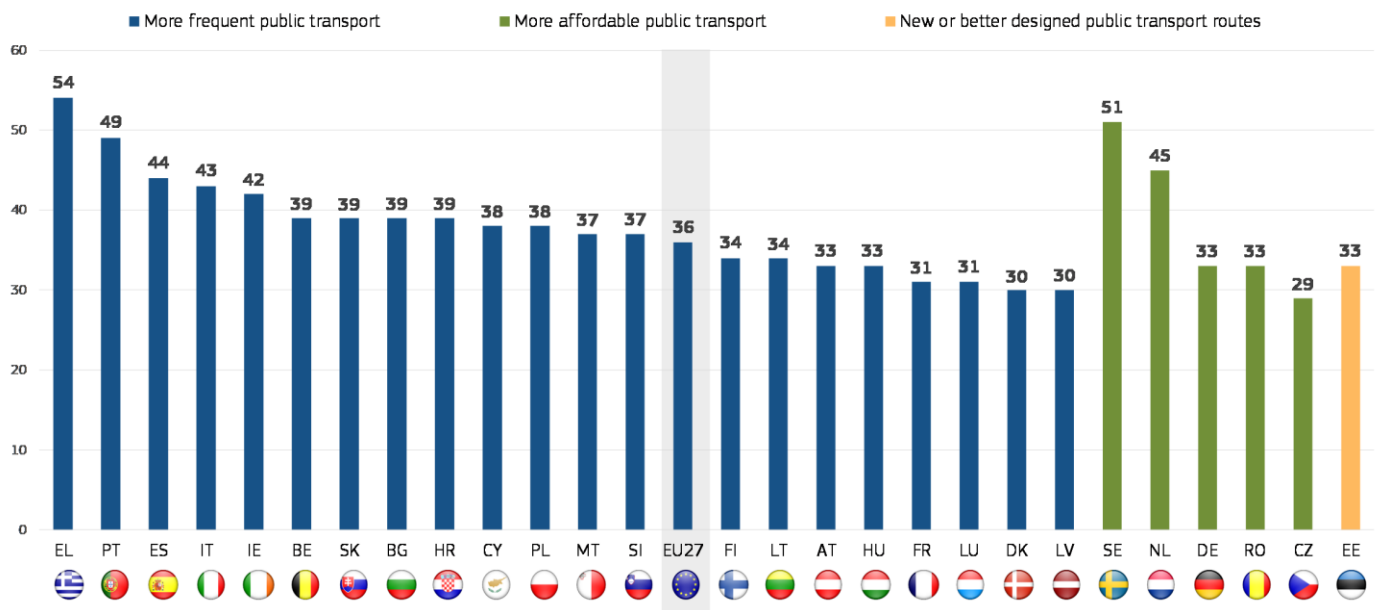

## Special Eurobarometer 527

### Fairness perceptions of the green transition

Results from the **socio-demographic analysis at EU level** showed a lot of differences among respondents, for example, with financial difficulties, education, employment or age.

- Those aged 15-54 are the most likely to mention faster public transport, new or better designed public transport routes or more and safer bicycle lanes compared to respondents aged 55+. For example, 28% of 15-24-year-olds mention faster public transport, compared to 19% of those aged 55+, as an important aspect that would help them adopt more sustainable modes of transport.
- The more disposable income a respondent has, the more likely they are to mention faster public transport, new or better-designed routes or better interconnectivity between public and private modes of transport, and the less likely they are to mention better affordability.
- The more financial difficulties a respondent experiences, the more likely they are to mention more affordable public transport: 36% with the most difficulties do so, compared to 27% with the least difficulties. Those with the least difficulties (22%) are also the most likely to mention more and safer bicycle lanes, compared to those with difficulties at least some of the time (16%).
- Respondents with a university level of education are more likely to mention more bicycle lanes (24%) and faster public transport (26%) than any other group. However, they are less likely to mention more affordable public transport (26%), especially compared to people with a secondary (31%) or below secondary (30%) level of education.
- Respondents employed with a temporary work agency / an online platform (24%) are the most likely to mention better interconnectivity between public and private modes of transport. Students are more likely than other employment groups to mention more affordable public transport (33%), safer bicycle lanes (28%) and more frequent public transport (39%).
- The more urbanised a respondent's environment, the more likely they are to mention faster public transport. Respondents from rural areas are more likely to mention more frequent public transport or closer public transport stops.

**Special Eurobarometer 527**  
**Fairness perceptions of the green transition**

**QA13** From the following list, which aspects would help you the most to adopt a more sustainable transport mode? (MAX. 3 ANSWERS)

|                                                                                                                    | More frequent public transport | More affordable public transport | Faster public transport | New or better designed public transport routes | More and safer bicycle lanes | Closer public transport stops |
|--------------------------------------------------------------------------------------------------------------------|--------------------------------|----------------------------------|-------------------------|------------------------------------------------|------------------------------|-------------------------------|
| EU27                                                                                                               | 36                             | 29                               | 23                      | 21                                             | 20                           | 19                            |
|  <b>Gender</b>                    |                                |                                  |                         |                                                |                              |                               |
| Man                                                                                                                | 35                             | 28                               | 23                      | 22                                             | 21                           | 17                            |
| Woman                                                                                                              | 38                             | 30                               | 23                      | 21                                             | 19                           | 21                            |
|  <b>Age</b>                       |                                |                                  |                         |                                                |                              |                               |
| 15-24                                                                                                              | 37                             | 32                               | 28                      | 21                                             | 26                           | 17                            |
| 25-39                                                                                                              | 37                             | 28                               | 25                      | 22                                             | 23                           | 19                            |
| 40-54                                                                                                              | 37                             | 29                               | 26                      | 23                                             | 20                           | 17                            |
| 55 +                                                                                                               | 35                             | 28                               | 19                      | 19                                             | 16                           | 20                            |
|  <b>Difficulties paying bills</b> |                                |                                  |                         |                                                |                              |                               |
| Most of the time                                                                                                   | 39                             | 36                               | 25                      | 21                                             | 16                           | 21                            |
| From time to time                                                                                                  | 39                             | 32                               | 24                      | 20                                             | 16                           | 22                            |
| Almost never/ Never                                                                                                | 35                             | 27                               | 23                      | 22                                             | 22                           | 17                            |
| <b>Total disposable income - quintile</b>                                                                          |                                |                                  |                         |                                                |                              |                               |
| 1st quintile                                                                                                       | 34                             | 32                               | 19                      | 18                                             | 18                           | 21                            |
| 2nd quintile                                                                                                       | 37                             | 31                               | 21                      | 20                                             | 20                           | 19                            |
| 3rd quintile                                                                                                       | 36                             | 30                               | 25                      | 23                                             | 20                           | 18                            |
| 4th quintile                                                                                                       | 36                             | 29                               | 24                      | 25                                             | 22                           | 18                            |
| 5th quintile                                                                                                       | 36                             | 25                               | 28                      | 26                                             | 23                           | 15                            |
| <b>Employment status</b>                                                                                           |                                |                                  |                         |                                                |                              |                               |
| Employed on an open ended contract                                                                                 | 37                             | 29                               | 26                      | 24                                             | 22                           | 17                            |
| Employed on a short-term contract                                                                                  | 35                             | 33                               | 25                      | 24                                             | 21                           | 18                            |
| Employed with a temporary work agency / an online platform                                                         | 29                             | 21                               | 18                      | 22                                             | 18                           | 19                            |
| Self-employed without employees                                                                                    | 35                             | 24                               | 22                      | 21                                             | 21                           | 17                            |
| Self-employed with employees                                                                                       | 30                             | 22                               | 25                      | 19                                             | 17                           | 12                            |
| Unemployed                                                                                                         | 39                             | 35                               | 22                      | 18                                             | 18                           | 19                            |
| Retired                                                                                                            | 35                             | 28                               | 17                      | 18                                             | 16                           | 21                            |
| Looking after home, inactive                                                                                       | 40                             | 33                               | 23                      | 18                                             | 15                           | 24                            |
| Student                                                                                                            | 40                             | 31                               | 29                      | 22                                             | 27                           | 19                            |
| Other                                                                                                              | 28                             | 29                               | 21                      | 18                                             | 23                           | 17                            |
| <b>What is the highest level of education you completed? (ONE ANSWER ONLY)</b>                                     |                                |                                  |                         |                                                |                              |                               |
| Below secondary                                                                                                    | 39                             | 30                               | 20                      | 16                                             | 7                            | 20                            |
| Secondary                                                                                                          | 36                             | 31                               | 23                      | 20                                             | 19                           | 20                            |
| Post secondary                                                                                                     | 36                             | 27                               | 23                      | 22                                             | 23                           | 18                            |
| University                                                                                                         | 38                             | 26                               | 26                      | 25                                             | 24                           | 14                            |
| <b>Which of the following best describes the area where you live?</b>                                              |                                |                                  |                         |                                                |                              |                               |
| A big city                                                                                                         | 33                             | 31                               | 27                      | 21                                             | 21                           | 16                            |
| The suburbs or outskirts of a big city                                                                             | 35                             | 31                               | 21                      | 22                                             | 22                           | 16                            |
| A town or a small city                                                                                             | 36                             | 29                               | 22                      | 20                                             | 21                           | 20                            |
| A country village                                                                                                  | 40                             | 28                               | 21                      | 22                                             | 17                           | 21                            |
| A farm or home in the countryside                                                                                  | 41                             | 24                               | 18                      | 31                                             | 11                           | 26                            |
| <b>Do you have a car?</b>                                                                                          |                                |                                  |                         |                                                |                              |                               |
| Yes, diesel                                                                                                        | 37                             | 25                               | 24                      | 22                                             | 20                           | 18                            |
| Yes, petrol                                                                                                        | 37                             | 29                               | 23                      | 22                                             | 20                           | 20                            |
| Yes, hybrid                                                                                                        | 35                             | 23                               | 26                      | 25                                             | 24                           | 16                            |
| Yes, electric                                                                                                      | 24                             | 20                               | 22                      | 23                                             | 27                           | 10                            |
| Yes, other                                                                                                         | 32                             | 20                               | 14                      | 15                                             | 16                           | 19                            |
| No, cannot afford                                                                                                  | 38                             | 39                               | 23                      | 18                                             | 19                           | 21                            |
| No, other reason                                                                                                   | 35                             | 30                               | 22                      | 19                                             | 20                           | 18                            |

## Special Eurobarometer 527

### Fairness perceptions of the green transition

**QA13** From the following list, which aspects would help you the most to adopt a more sustainable transport mode? (MAX. 3 ANSWERS) (% - EU)

|                                                                                | Better interconnectivity between public and private modes of | Less polluted and less congested streets | More pedestrian-friendly streets | More affordable electric bikes | Improved car sharing options | Other (SPONTANEOUS) | None (SPONTANEOUS) | Don't know |
|--------------------------------------------------------------------------------|--------------------------------------------------------------|------------------------------------------|----------------------------------|--------------------------------|------------------------------|---------------------|--------------------|------------|
| EU27                                                                           | 16                                                           | 15                                       | 14                               | 13                             | 8                            | 1                   | 6                  | 2          |
| <b>Gender</b>                                                                  |                                                              |                                          |                                  |                                |                              |                     |                    |            |
| Man                                                                            | 17                                                           | 16                                       | 13                               | 14                             | 8                            | 1                   | 6                  | 2          |
| Woman                                                                          | 15                                                           | 14                                       | 15                               | 12                             | 7                            | 1                   | 6                  | 2          |
| <b>Age</b>                                                                     |                                                              |                                          |                                  |                                |                              |                     |                    |            |
| 15-24                                                                          | 13                                                           | 16                                       | 15                               | 20                             | 8                            | 0                   | 3                  | 1          |
| 25-39                                                                          | 17                                                           | 15                                       | 12                               | 15                             | 10                           | 1                   | 3                  | 1          |
| 40-54                                                                          | 19                                                           | 15                                       | 12                               | 13                             | 9                            | 1                   | 6                  | 1          |
| 55 +                                                                           | 15                                                           | 14                                       | 16                               | 9                              | 6                            | 1                   | 9                  | 2          |
| <b>Difficulties paying bills</b>                                               |                                                              |                                          |                                  |                                |                              |                     |                    |            |
| Most of the time                                                               | 14                                                           | 16                                       | 17                               | 13                             | 8                            | 1                   | 4                  | 1          |
| From time to time                                                              | 15                                                           | 18                                       | 15                               | 13                             | 8                            | 1                   | 5                  | 1          |
| Almost never/ Never                                                            | 17                                                           | 13                                       | 13                               | 12                             | 8                            | 1                   | 7                  | 2          |
| <b>Total disposable income - quintile</b>                                      |                                                              |                                          |                                  |                                |                              |                     |                    |            |
| 1st quintile                                                                   | 13                                                           | 15                                       | 16                               | 13                             | 6                            | 1                   | 7                  | 3          |
| 2nd quintile                                                                   | 15                                                           | 16                                       | 15                               | 14                             | 6                            | 0                   | 6                  | 2          |
| 3rd quintile                                                                   | 18                                                           | 13                                       | 13                               | 13                             | 9                            | 1                   | 5                  | 1          |
| 4th quintile                                                                   | 19                                                           | 14                                       | 12                               | 14                             | 10                           | 1                   | 5                  | 1          |
| 5th quintile                                                                   | 20                                                           | 16                                       | 12                               | 12                             | 10                           | 0                   | 5                  | 1          |
| <b>Employment status</b>                                                       |                                                              |                                          |                                  |                                |                              |                     |                    |            |
| Employed on an open ended contract                                             | 18                                                           | 15                                       | 12                               | 14                             | 10                           | 1                   | 5                  | 1          |
| Employed on a short-term contract                                              | 18                                                           | 14                                       | 12                               | 15                             | 9                            | 0                   | 4                  | 2          |
| Employed with a temporary work agency / an online platform                     | 24                                                           | 17                                       | 8                                | 12                             | 13                           | 0                   | 1                  | 1          |
| Self-employed without employees                                                | 20                                                           | 18                                       | 11                               | 12                             | 10                           | 1                   | 6                  | 1          |
| Self-employed with employees                                                   | 19                                                           | 13                                       | 11                               | 14                             | 11                           | 1                   | 12                 | 0          |
| Unemployed                                                                     | 15                                                           | 16                                       | 14                               | 17                             | 7                            | 0                   | 4                  | 2          |
| Retired                                                                        | 13                                                           | 14                                       | 17                               | 8                              | 5                            | 1                   | 10                 | 3          |
| Looking after home, inactive                                                   | 12                                                           | 14                                       | 17                               | 9                              | 5                            | 1                   | 6                  | 2          |
| Student                                                                        | 13                                                           | 17                                       | 14                               | 19                             | 7                            | 0                   | 2                  | 1          |
| Other                                                                          | 23                                                           | 15                                       | 3                                | 23                             | 5                            | 1                   | 11                 | 1          |
| <b>What is the highest level of education you completed? (ONE ANSWER ONLY)</b> |                                                              |                                          |                                  |                                |                              |                     |                    |            |
| Below secondary                                                                | 9                                                            | 14                                       | 14                               | 6                              | 3                            | 2                   | 13                 | 4          |
| Secondary                                                                      | 15                                                           | 15                                       | 15                               | 13                             | 7                            | 1                   | 6                  | 2          |
| Post secondary                                                                 | 18                                                           | 13                                       | 12                               | 14                             | 8                            | 0                   | 6                  | 2          |
| University                                                                     | 19                                                           | 15                                       | 12                               | 12                             | 10                           | 1                   | 5                  | 1          |
| <b>Which of the following best describes the area where you live?</b>          |                                                              |                                          |                                  |                                |                              |                     |                    |            |
| A big city                                                                     | 15                                                           | 20                                       | 16                               | 12                             | 8                            | 1                   | 6                  | 1          |
| The suburbs or outskirts of a big city                                         | 17                                                           | 13                                       | 12                               | 15                             | 6                            | 1                   | 7                  | 1          |
| A town or a small city                                                         | 16                                                           | 15                                       | 15                               | 14                             | 8                            | 1                   | 7                  | 2          |
| A country village                                                              | 18                                                           | 10                                       | 11                               | 11                             | 7                            | 1                   | 6                  | 2          |
| A farm or home in the countryside                                              | 24                                                           | 8                                        | 7                                | 14                             | 5                            | 2                   | 6                  | 1          |
| <b>Do you have a car?</b>                                                      |                                                              |                                          |                                  |                                |                              |                     |                    |            |
| Yes, diesel                                                                    | 18                                                           | 14                                       | 12                               | 13                             | 9                            | 1                   | 6                  | 2          |
| Yes, petrol                                                                    | 19                                                           | 15                                       | 12                               | 12                             | 8                            | 1                   | 7                  | 1          |
| Yes, hybrid                                                                    | 24                                                           | 17                                       | 14                               | 15                             | 10                           | 1                   | 4                  | 1          |
| Yes, electric                                                                  | 14                                                           | 10                                       | 14                               | 16                             | 13                           | 3                   | 9                  | 0          |
| Yes, other                                                                     | 21                                                           | 14                                       | 10                               | 11                             | 13                           | 0                   | 5                  | 0          |
| No, cannot afford                                                              | 12                                                           | 15                                       | 18                               | 11                             | 5                            | 0                   | 4                  | 2          |
| No, other reason                                                               | 10                                                           | 17                                       | 19                               | 12                             | 5                            | 1                   | 7                  | 3          |

### 3. Access to green spaces

#### Three-quarters of respondents live within a ten minutes' walk of green space, and more than eight in ten are satisfied with its quality

A large majority of respondents live within ten minutes of walking distance of green space.<sup>33</sup> Half (50%) live five minutes or less away, while 26% say they live between six- and ten-minutes' walk away. Around one in seven (16%) live 11-20 minutes' walk from a green space, with 5% living 21-30 minutes away and 2% more than 30 minutes away.

In 22 Member States, respondents are most likely to live within a five-minute walk to their nearest green space, although proportions range from 85% in Finland, 84% in Slovenia and 82% in Sweden to 35% in Greece, 37% in Poland and 38% in Hungary.

In Italy (34%), Portugal (33%), and Bulgaria (31%), respondents most often live between a six- and ten-minutes' walk from a green space.

In Malta (24%), respondents are most likely to live an 11-20 minutes' walk from a green space. In Romania, respondents are equally likely to live six to ten- or 11-20-minutes' walk away (both 30%).

There are only four countries where at least one in ten lives a 21-30-minute walk away from the nearest green space: Romania (16%), Malta (11%), Bulgaria and Greece (both 10%). Malta (21%) is the only country where at least one in ten lives more than 30 minutes' walk away.

QA14 How long does it take to walk from your home to the nearest green space? (% - EU27)

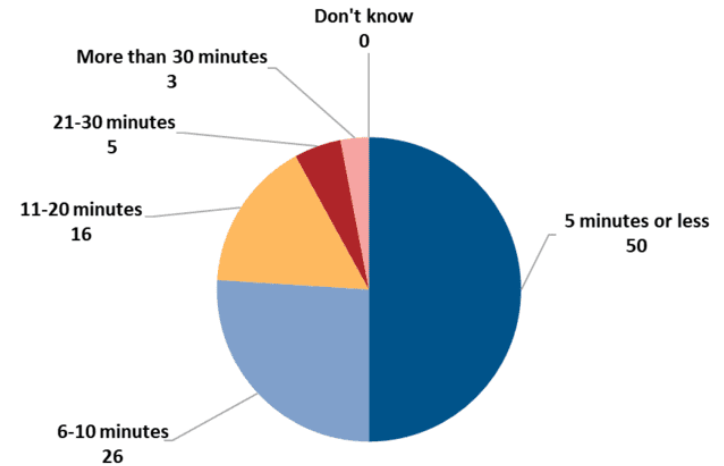

(May / Jun. 2022)

QA14 How long does it take to walk from your home to the nearest green space? (%)

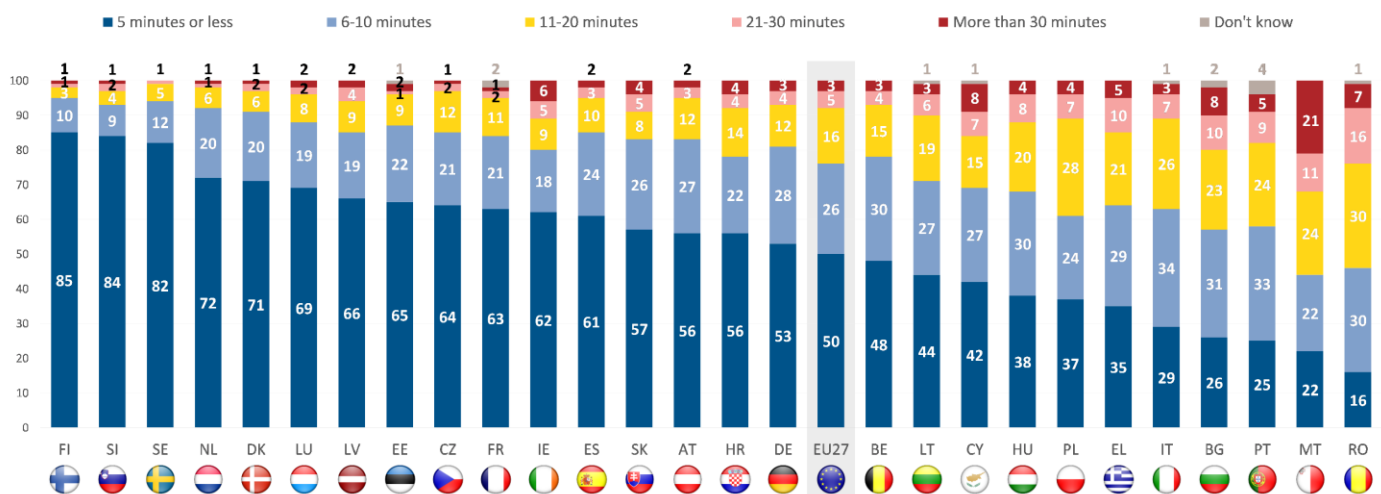

<sup>33</sup> QA14. How long does it take to walk from your home to the nearest green space?

## Special Eurobarometer 527

### Fairness perceptions of the green transition

The **socio-demographic analysis** at EU level shows the most notable differences are between those living within five minutes' walk of their nearest green space and those living an 11 - 20 minutes' walk away, with education level, financial situation and urbanisation the key differentiators.

- For example, 61% of respondents with a post-secondary level of education are within a five minutes' walk of their nearest green space, compared to 46% of those with a secondary level and 47% of those with a level below secondary.
- The differences are even larger based on the financial situation. More than half (55%) of those who rarely or never have trouble paying bills live within five minutes' walk of green space, compared to (42%) around four in ten who have trouble paying bills at least some of the time. Similarly, 20% who have financial difficulties at least some of the time live 11-20 minutes' walk from a green space, compared to 13% who experience the least financial difficulties.
- In addition, those with disposable income in the 5<sup>th</sup> quintile (56%) are the most likely to live within five minutes of green space.
- Not surprisingly, the less urbanised a respondent's environment, the more likely they are to live close to green space. For example, 83% of those living in the countryside are within five minutes' walk of green space, as are 60% who live in a country village and 56% who live in the suburbs or outskirts of a big town. In contrast, 47% living in towns or small cities and 42% living in big cities are also within a five-minute walk of green space.
- In addition, respondents who are employed with a temporary work agency / an online platform are much less likely than those in other employment groups to live within a five minutes' walk (38%) but much more likely to live 21-30 minutes' walk (16%) from their nearest green space.

**Special Eurobarometer 527**  
**Fairness perceptions of the green transition**

**QA14** How long does it take to walk from your home to the nearest green space?  
(% - EU)

|                                                                                                                    | 5 minutes or less | 6-10 minutes | 11-20 minutes | 21-30 minutes | More than 30 minutes | Don't know |
|--------------------------------------------------------------------------------------------------------------------|-------------------|--------------|---------------|---------------|----------------------|------------|
| EU27                                                                                                               | 50                | 26           | 16            | 5             | 3                    | 0          |
|  <b>Gender</b>                    |                   |              |               |               |                      |            |
| Man                                                                                                                | 50                | 27           | 16            | 4             | 3                    | 0          |
| Woman                                                                                                              | 50                | 25           | 16            | 5             | 3                    | 1          |
|  <b>Age</b>                       |                   |              |               |               |                      |            |
| 15-24                                                                                                              | 53                | 25           | 14            | 4             | 3                    | 1          |
| 25-39                                                                                                              | 49                | 26           | 16            | 5             | 3                    | 1          |
| 40-54                                                                                                              | 48                | 28           | 16            | 5             | 2                    | 1          |
| 55 +                                                                                                               | 51                | 25           | 16            | 4             | 3                    | 1          |
|  <b>Difficulties paying bills</b> |                   |              |               |               |                      |            |
| Most of the time                                                                                                   | 41                | 27           | 20            | 6             | 5                    | 1          |
| From time to time                                                                                                  | 42                | 28           | 20            | 6             | 3                    | 1          |
| Almost never/ Never                                                                                                | 55                | 25           | 13            | 4             | 2                    | 1          |
| <b>Total disposable income - quintile</b>                                                                          |                   |              |               |               |                      |            |
| 1st quintile                                                                                                       | 48                | 25           | 17            | 5             | 4                    | 1          |
| 2nd quintile                                                                                                       | 50                | 25           | 16            | 6             | 3                    | 0          |
| 3rd quintile                                                                                                       | 51                | 26           | 15            | 4             | 3                    | 1          |
| 4th quintile                                                                                                       | 49                | 28           | 17            | 4             | 2                    | 0          |
| 5th quintile                                                                                                       | 56                | 24           | 13            | 5             | 2                    | 0          |
| <b>Employment status</b>                                                                                           |                   |              |               |               |                      |            |
| Employed on an open ended contract                                                                                 | 50                | 27           | 16            | 5             | 2                    | 0          |
| Employed on a short-term contract                                                                                  | 48                | 29           | 17            | 4             | 2                    | 0          |
| Employed with a temporary work agency /<br>an online platform                                                      | 38                | 22           | 21            | 16            | 3                    | 0          |
| Self-employed without employees                                                                                    | 47                | 30           | 16            | 4             | 2                    | 1          |
| Self-employed with employees                                                                                       | 52                | 20           | 16            | 6             | 6                    | 0          |
| Unemployed                                                                                                         | 48                | 24           | 19            | 5             | 3                    | 1          |
| Retired                                                                                                            | 52                | 24           | 15            | 5             | 3                    | 1          |
| Looking after home, inactive                                                                                       | 46                | 27           | 18            | 5             | 3                    | 1          |
| Student                                                                                                            | 52                | 25           | 14            | 4             | 4                    | 1          |
| Other                                                                                                              | 49                | 38           | 7             | 1             | 5                    | 0          |
| <b>What is the highest level of education you completed? (ONE ANSWER ONLY)</b>                                     |                   |              |               |               |                      |            |
| Below secondary                                                                                                    | 47                | 26           | 15            | 6             | 3                    | 3          |
| Secondary                                                                                                          | 46                | 27           | 18            | 5             | 3                    | 1          |
| Post secondary                                                                                                     | 61                | 22           | 12            | 3             | 2                    | 0          |
| University                                                                                                         | 55                | 26           | 13            | 4             | 2                    | 0          |
| <b>Which of the following best describes the area where you live?</b>                                              |                   |              |               |               |                      |            |
| A big city                                                                                                         | 42                | 28           | 20            | 6             | 3                    | 1          |
| The suburbs or outskirts of a big city                                                                             | 56                | 24           | 13            | 4             | 3                    | 0          |
| A town or a small city                                                                                             | 47                | 28           | 17            | 5             | 2                    | 1          |
| A country village                                                                                                  | 60                | 20           | 11            | 5             | 3                    | 1          |
| A farm or home in the countryside                                                                                  | 83                | 6            | 4             | 2             | 5                    | 0          |

## Special Eurobarometer 527

### Fairness perceptions of the green transition

A large majority of respondents (85%) say they are satisfied with the quality of the green space nearest their home, with 34% saying they are “very satisfied”.<sup>34</sup> Just over one in ten (14%) are dissatisfied, with 2% “very dissatisfied”.

More than six in ten respondents in each country say they are satisfied with the quality of the green space nearest to their home. Almost all respondents in Luxembourg (97%) feel this way, as do 95% in Ireland and Slovenia. At the other end of the scale, 62% in Malta, 68% in Cyprus and 70% in Bulgaria think the same way.

In eight countries, including Slovenia (68%), Denmark (63%), and Sweden (60%), at least half say they are “very satisfied” with the quality of their nearest green space.

**QA15** Taking all aspects into account, how satisfied or dissatisfied are you with the quality of the nearest green space to your home? 'Quality' might include how well it meets their needs, whether it is safe, attractive, free of litter or other mess, and the quality of the facilities if there are any.

(% - EU27)

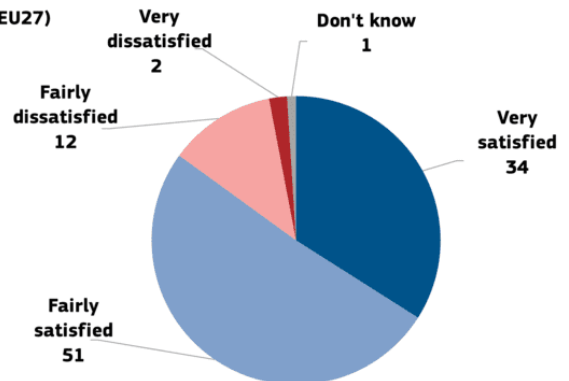

(May / Jun. 2022)

**QA15** Taking all aspects into account, how satisfied or dissatisfied are you with the quality of the nearest green space to your home? 'Quality' might include how well it meets their needs, whether it is safe, attractive, free of litter or other mess, and the quality of the facilities if there are any.

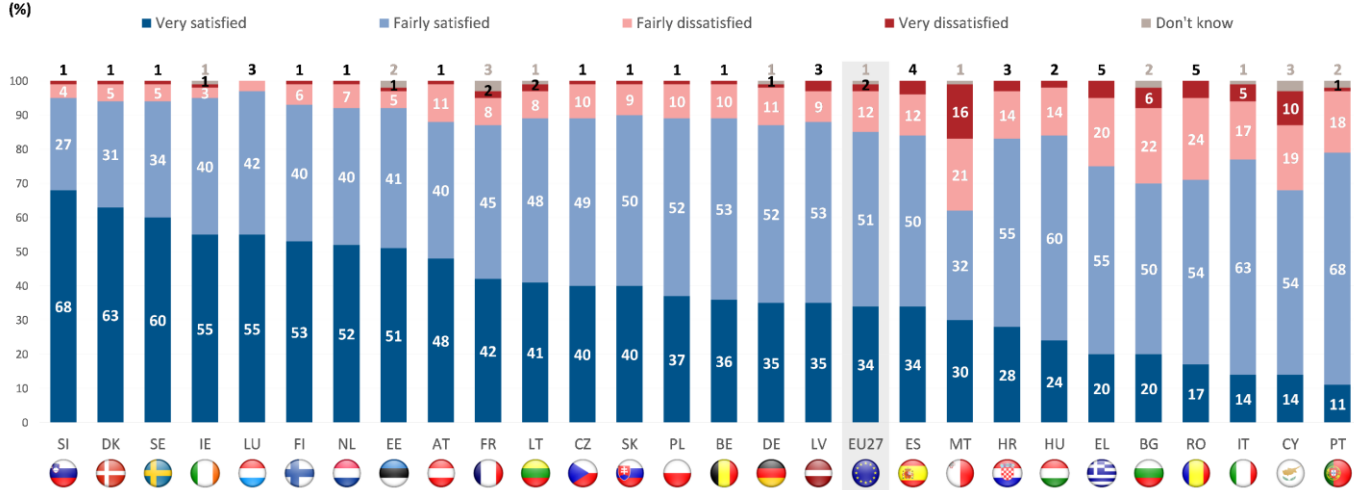

<sup>34</sup> QA15. Taking all aspects into account, how satisfied or dissatisfied are you with the quality of the nearest green space to your home?

'Quality' might include how well it meets their needs, whether it is safe, attractive, free of litter or other mess, and the quality of the facilities if there are any.



## Special Eurobarometer 527

### Fairness perceptions of the green transition

Given respondents' high level of satisfaction with the quality of their nearest green space, it is not surprising there are few differences in the **socio-demographic analysis at EU level**.

- Respondents with a higher level of education are slightly more satisfied than those with a lower level of education. For example, 87% of those with a university or post-secondary level of education are satisfied, compared to 81% of those with a level below secondary.
- The fewer financial difficulties a respondent experiences, the more likely they are to be satisfied: 88% with the least difficulties are satisfied with the quality, compared to 76% who have the most difficulties.
- Respondents who are employed with a temporary work agency / an online platform (71%) are much less likely to be satisfied than other employment groups. It is worth noting that this group were also more likely to live further from their nearest green space.
- Finally, people living in country villages (87%) or farms/homes in the countryside (93%) are more likely to be satisfied than those in urbanized areas. For example, 83% of respondents living in either big cities or in the suburbs say they are satisfied.

**Special Eurobarometer 527**  
**Fairness perceptions of the green transition**

**QA15** Taking all aspects into account, how satisfied or dissatisfied are you with the quality of the nearest green space to your home? 'Quality' might include how well it meets their needs, whether it is safe, attractive, free of litter or other mess, and the quality of the facilities if there are any.

(% - EU)

|                                                                                                                    | Very satisfied | Fairly satisfied | Fairly dissatisfied | Very dissatisfied | Don't know | Total 'Satisfied' | Total 'Unsatisfied' | Don't know |
|--------------------------------------------------------------------------------------------------------------------|----------------|------------------|---------------------|-------------------|------------|-------------------|---------------------|------------|
| EU27                                                                                                               | 34             | 51               | 12                  | 2                 | 1          | 85                | 14                  | 1          |
|  <b>Gender</b>                    |                |                  |                     |                   |            |                   |                     |            |
| Man                                                                                                                | 33             | 52               | 12                  | 2                 | 1          | 85                | 14                  | 1          |
| Woman                                                                                                              | 35             | 50               | 12                  | 2                 | 1          | 85                | 14                  | 1          |
|  <b>Age</b>                       |                |                  |                     |                   |            |                   |                     |            |
| 15-24                                                                                                              | 33             | 52               | 11                  | 3                 | 1          | 85                | 14                  | 1          |
| 25-39                                                                                                              | 33             | 51               | 12                  | 3                 | 1          | 84                | 15                  | 1          |
| 40-54                                                                                                              | 32             | 52               | 13                  | 2                 | 1          | 84                | 15                  | 1          |
| 55 +                                                                                                               | 36             | 50               | 11                  | 2                 | 1          | 86                | 13                  | 1          |
|  <b>Difficulties paying bills</b> |                |                  |                     |                   |            |                   |                     |            |
| Most of the time                                                                                                   | 27             | 49               | 17                  | 5                 | 2          | 76                | 22                  | 2          |
| From time to time                                                                                                  | 24             | 56               | 16                  | 3                 | 1          | 80                | 19                  | 1          |
| Almost never/ Never                                                                                                | 39             | 49               | 9                   | 2                 | 1          | 88                | 11                  | 1          |
| <b>Total disposable income - quintile</b>                                                                          |                |                  |                     |                   |            |                   |                     |            |
| 1st quintile                                                                                                       | 33             | 50               | 12                  | 3                 | 2          | 83                | 15                  | 2          |
| 2nd quintile                                                                                                       | 32             | 53               | 12                  | 2                 | 1          | 85                | 14                  | 1          |
| 3rd quintile                                                                                                       | 35             | 52               | 11                  | 2                 | 0          | 87                | 13                  | 0          |
| 4th quintile                                                                                                       | 35             | 51               | 11                  | 2                 | 1          | 86                | 13                  | 1          |
| 5th quintile                                                                                                       | 38             | 49               | 11                  | 2                 | 0          | 87                | 13                  | 0          |
| <b>Employment status</b>                                                                                           |                |                  |                     |                   |            |                   |                     |            |
| Employed on an open ended contract                                                                                 | 34             | 52               | 11                  | 2                 | 1          | 86                | 13                  | 1          |
| Employed on a short-term contract                                                                                  | 29             | 53               | 13                  | 4                 | 1          | 82                | 17                  | 1          |
| Employed with a temporary work agency / an online platform                                                         | 19             | 52               | 28                  | 1                 | 0          | 71                | 29                  | 0          |
| Self-employed without employees                                                                                    | 32             | 53               | 12                  | 2                 | 1          | 85                | 14                  | 1          |
| Self-employed with employees                                                                                       | 38             | 47               | 13                  | 2                 | 0          | 85                | 15                  | 0          |
| Unemployed                                                                                                         | 31             | 49               | 13                  | 5                 | 2          | 80                | 18                  | 2          |
| Retired                                                                                                            | 37             | 49               | 11                  | 2                 | 1          | 86                | 13                  | 1          |
| Looking after home, inactive                                                                                       | 28             | 52               | 15                  | 4                 | 1          | 80                | 19                  | 1          |
| Student                                                                                                            | 31             | 53               | 12                  | 3                 | 1          | 84                | 15                  | 1          |
| Other                                                                                                              | 33             | 35               | 31                  | 1                 | 0          | 68                | 32                  | 0          |
| <b>What is the highest level of education you completed? (ONE ANSWER ONLY)</b>                                     |                |                  |                     |                   |            |                   |                     |            |
| Below secondary                                                                                                    | 29             | 52               | 14                  | 3                 | 2          | 81                | 17                  | 2          |
| Secondary                                                                                                          | 30             | 54               | 13                  | 2                 | 1          | 84                | 15                  | 1          |
| Post secondary                                                                                                     | 44             | 43               | 11                  | 2                 | 0          | 87                | 13                  | 0          |
| University                                                                                                         | 39             | 48               | 10                  | 2                 | 1          | 87                | 12                  | 1          |
| <b>Which of the following best describes the area where you live?</b>                                              |                |                  |                     |                   |            |                   |                     |            |
| A big city                                                                                                         | 29             | 54               | 13                  | 3                 | 1          | 83                | 16                  | 1          |
| The suburbs or outskirts of a big city                                                                             | 35             | 48               | 13                  | 4                 | 0          | 83                | 17                  | 0          |
| A town or a small city                                                                                             | 30             | 54               | 13                  | 2                 | 1          | 84                | 15                  | 1          |
| A country village                                                                                                  | 43             | 44               | 10                  | 2                 | 1          | 87                | 12                  | 1          |
| A farm or home in the countryside                                                                                  | 62             | 31               | 5                   | 2                 | 0          | 93                | 7                   | 0          |

## **IV. SUPPORT FOR POLICY ACTIONS TO ADVANCE A FAIR GREEN TRANSITION**

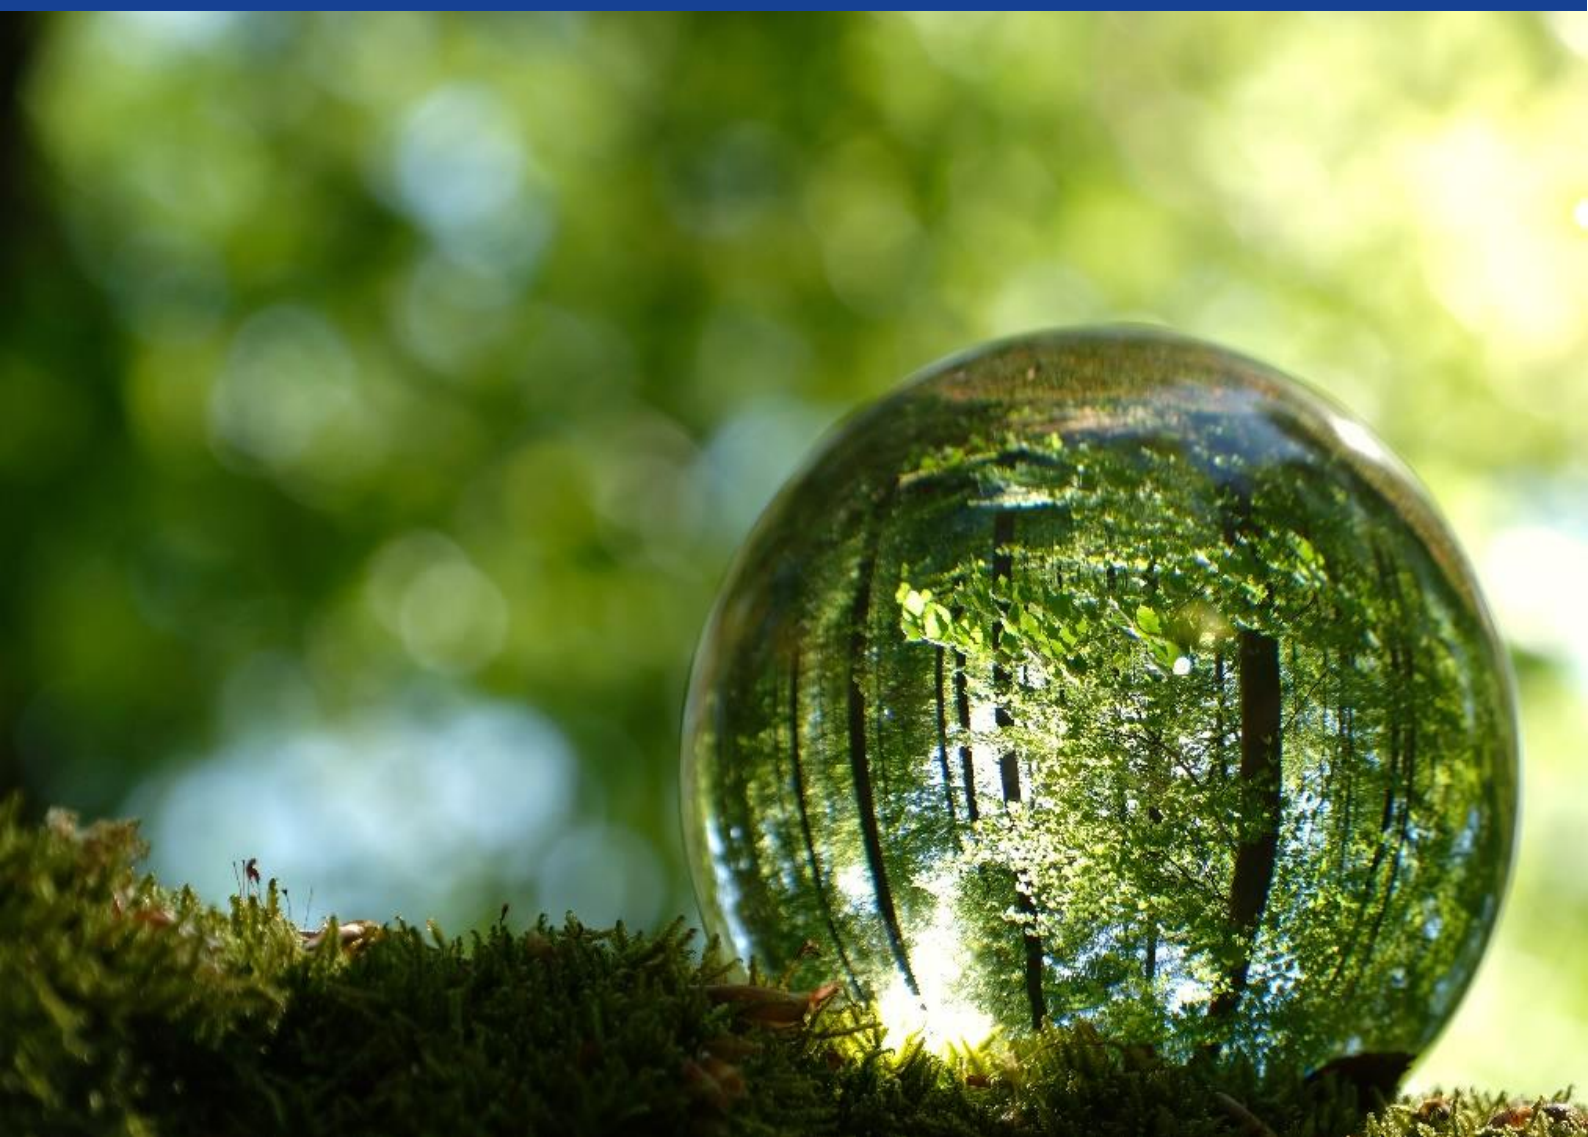

## Special Eurobarometer 527

### Fairness perceptions of the green transition

#### The majority are in favour of a range of policies to limit climate change in a fair and inclusive way.

Respondents were asked about their level of support for a range of policies designed to limit climate change in a way that is inclusive, fair and leaves no one behind.<sup>35</sup>

Almost nine in ten (89%) are in favour of subsidising people to help make their homes more energy efficient, especially those with lower disposable income and the most vulnerable households, with 46% “strongly in favour”. The same proportion (89%) support increasing their country’s investments in public transport infrastructure, with 45% “strongly in favour”.

A large majority (87%) is in favour of encouraging private companies, through rules and incentives, too (1) reduce their emissions faster, (2) switch to more energy-efficient production methods, (3) adopt more circular and sustainable processes and (4) retrain their workforce as needed. More than four in ten (42%) are “strongly in favour” of such policies.

Over seven in ten (71%) are in favour of taxing products and services that contribute most to climate change and redistributing revenues to the poorest and most vulnerable households, with 29% “strongly in favour”.

At national level, support for the five policies addressing climate change is particularly high in Southern Europe and Sweden. On the other end, levels of support are particularly low in Hungary.

QA16. To what extent are you for or against the following policies in [OUR COUNTRY] to limit climate change in a way that it is inclusive and fair and leaves no one behind?  
(% - EU)

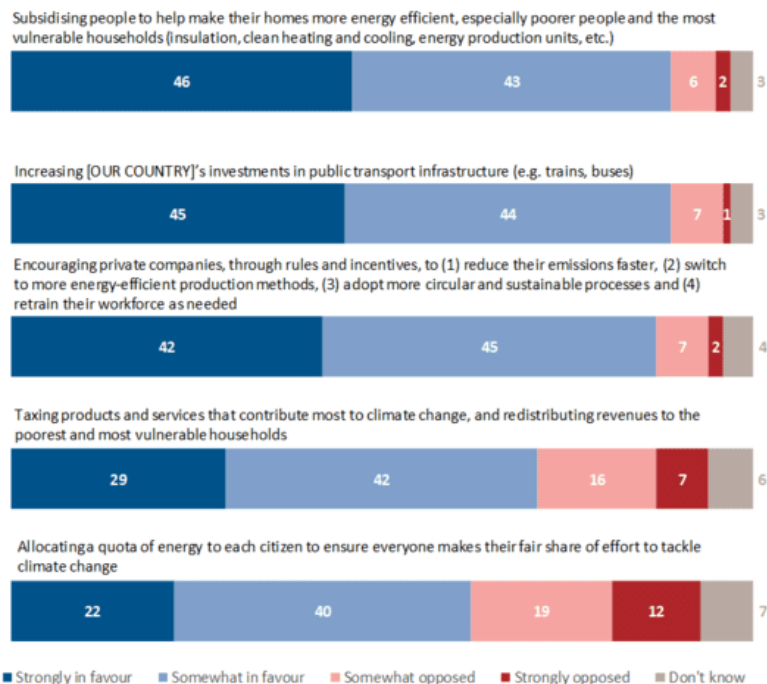

<sup>35</sup> QA16. To what extent are you for or against the following policies in [OUR COUNTRY] to limit climate change in a way that it is inclusive and fair and leaves no one behind? 16.1 Increasing [OUR COUNTRY]'s investments in public transport infrastructure (e.g. trains, buses); 16.2 Taxing products and services that contribute most to climate change, and redistributing revenues to the poorest and most vulnerable households; 16.3 Allocating a quota of energy to each citizen to ensure everyone makes their fair share of effort to tackle climate change;

16.4 Subsidising people to help make their homes more energy efficient, especially poorer people and the most vulnerable households (insulation, clean heating and cooling, energy production units, etc.); 16.5 Encouraging private companies, through rules and incentives, to (1) reduce their emissions faster, (2) switch to more energy-efficient production methods, (3) adopt more circular and sustainable processes and (4) retrain their workforce as needed.

## Special Eurobarometer 527

### Fairness perceptions of the green transition

Across the EU, 62% of respondents are in favour of allocating a quota of energy to each citizen to ensure everyone makes their fair share of effort to tackle climate change, and this is also the majority opinion in 21 countries. More than eight in ten in Cyprus (89%), Croatia and Slovenia (both 81%) are in favour of this policy, while at the other end of the scale 41% in Czechia, 42% in Estonia and 44% in Sweden and the Netherlands think the same way. Cyprus (59%) is the only country where more than half are “strongly in favour” of this policy.

The proportion who says they don't know is particularly high in Estonia (17%).

QA16.3 To what extent are you for or against the following policies in [OUR COUNTRY] to limit climate change in a way that it is inclusive and fair and leaves no one behind?  
Allocating a quota of energy to each citizen to ensure everyone makes their fair share of effort to tackle climate change (% - EU27)

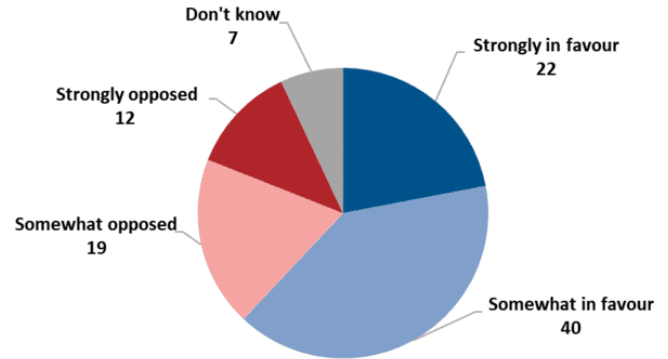

(May / Jun. 2022)

QA16.3 To what extent are you for or against the following policies in [OUR COUNTRY] to limit climate change in a way that it is inclusive and fair and leaves no one behind?  
(% - Allocating a quota of energy to each citizen to ensure everyone makes their fair share of effort to tackle climate change)

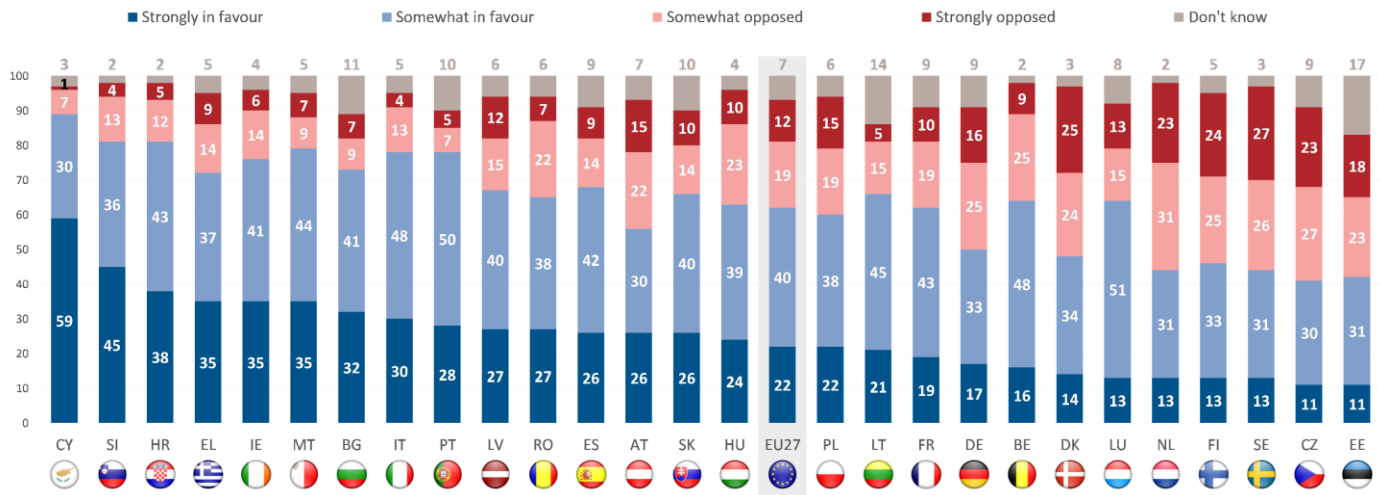

## Special Eurobarometer 527

### Fairness perceptions of the green transition

Across the EU, 71% are in favour of taxing products and services that contribute most to climate change and redistributing revenues to the poorest and most vulnerable households. The majority of respondents in each country are in favour of this policy.

At a national level, the proportions in favour range from 83% in Croatia, 82% in Portugal and 80% in Cyprus and Hungary to 62% in Estonia, 54% in Czechia and 51% in Latvia.

Cyprus (52%) is the only country where at least half are “strongly in favour” of this policy.

**QA16.2 To what extent are you for or against the following policies in [OUR COUNTRY] to limit climate change in a way that it is inclusive and fair and leaves no one behind?**  
Taxing products and services that contribute most to climate change, and redistributing revenues to the poorest and most vulnerable households (% - EU27)

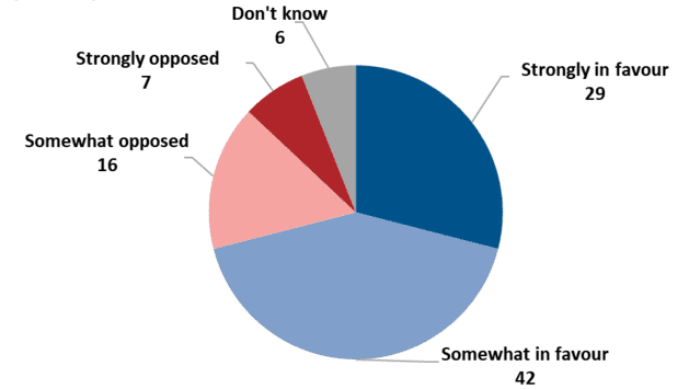

(May / Jun. 2022)

**QA16.2 To what extent are you for or against the following policies in [OUR COUNTRY] to limit climate change in a way that it is inclusive and fair and leaves no one behind?**  
(% - Taxing products and services that contribute most to climate change, and redistributing revenues to the poorest and most vulnerable households)

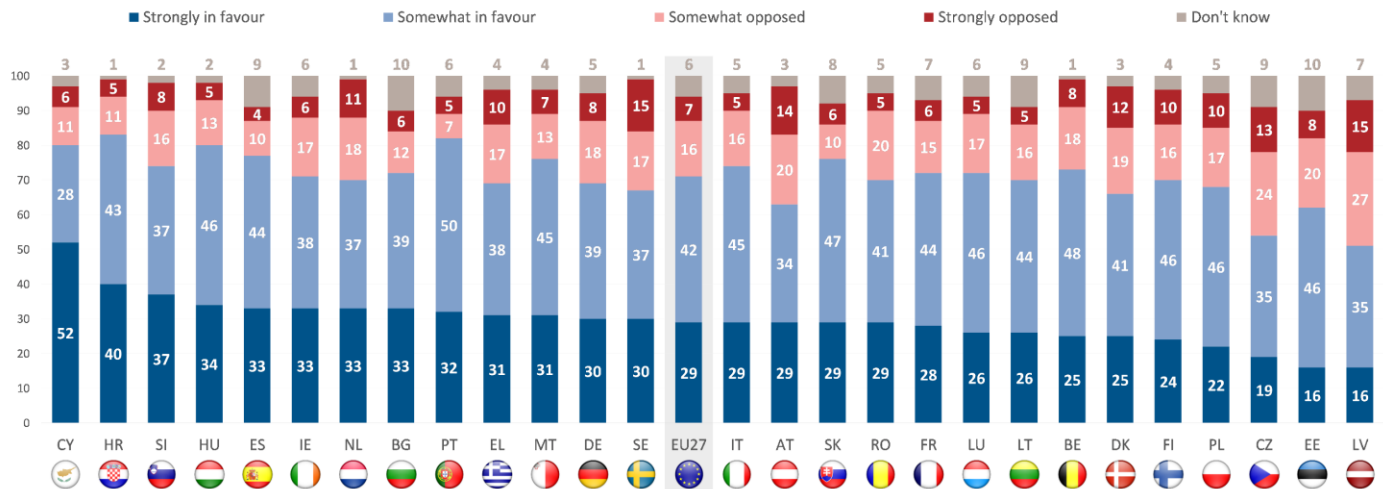



## Special Eurobarometer 527

### Fairness perceptions of the green transition

Almost nine in ten (90%) in the EU as a whole are in favour of subsidising people to help make their homes more energy efficient, especially those with lower disposable income and the most vulnerable households. In 16 countries, at least nine in ten respondents feel the same way. Support is almost universal in Malta (98%), Cyprus (97%) and Greece and Luxembourg (both 96%), and is also widespread in Romania (79%), Sweden and Austria (both 82%).

At least seven in ten in Cyprus (77%) and Greece (70%) are “strongly in favour” of this policy.

QA16.4 To what extent are you for or against the following policies in [OUR COUNTRY] to limit climate change in a way that it is inclusive and fair and leaves no one behind?  
Subsidising people to help make their homes more energy efficient, especially poorer people and the most vulnerable households (insulation, clean heating and cooling, energy production units, etc.)  
(% - EU27)

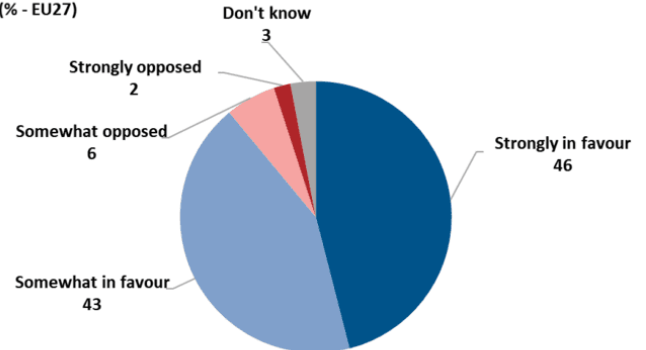

(May / Jun. 2022)

QA16.4 To what extent are you for or against the following policies in [OUR COUNTRY] to limit climate change in a way that it is inclusive and fair and leaves no one behind?  
(% - Subsidising people to help make their homes more energy efficient, especially poorer people and the most vulnerable households (insulation, clean heating and cooling, energy production units, etc.))

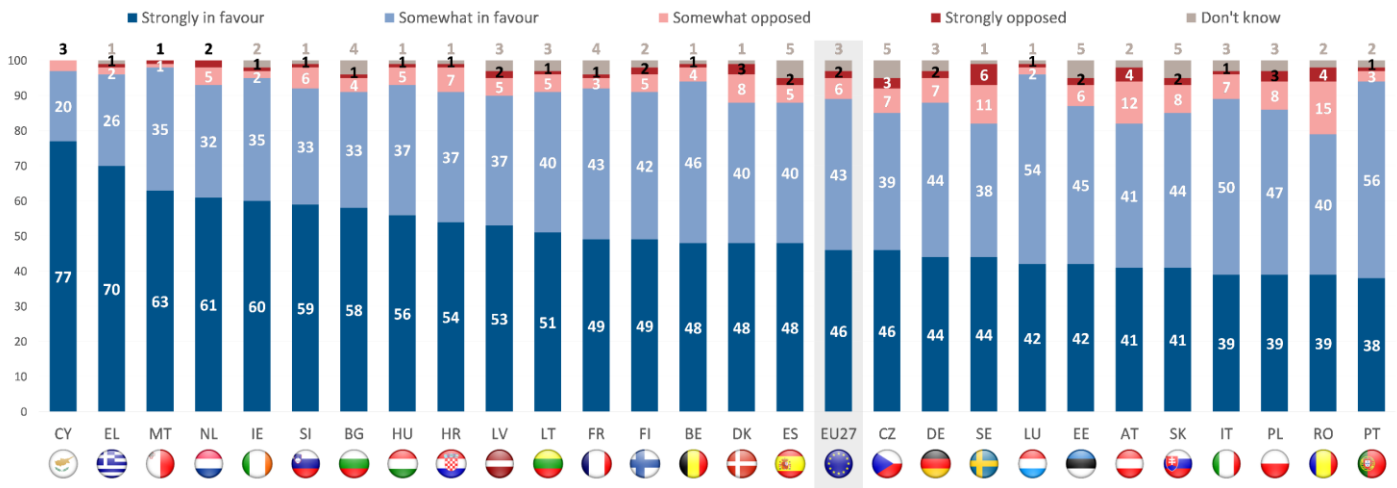

## Special Eurobarometer 527

### Fairness perceptions of the green transition

Large majorities in every EU Member State are in favour of increasing their country's investments in public transport infrastructure. Support lies above 80% in all Member States and is almost universal in Greece (97%) and Cyprus, Malta and Portugal (all 96%).

More than one in five in each country say they are "strongly in favour" of this policy, with the highest proportions seen in Cyprus (69%), Greece (68%) and Ireland (63%).

QA16.1 To what extent are you for or against the following policies in [OUR COUNTRY] to limit climate change in a way that it is inclusive and fair and leaves no one behind?

Increasing [OUR COUNTRY]'s investments in public transport infrastructure (e.g. trains, buses)  
(% - EU27)

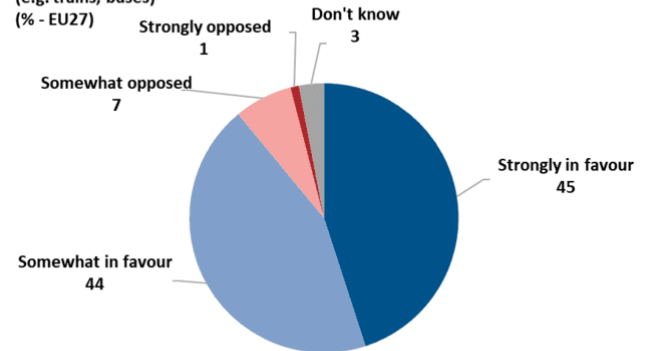

(May / Jun. 2022)

QA16.1 To what extent are you for or against the following policies in [OUR COUNTRY] to limit climate change in a way that it is inclusive and fair and leaves no one behind?  
(% - Increasing [OUR COUNTRY]'s investments in public transport infrastructure (e.g. trains, buses))

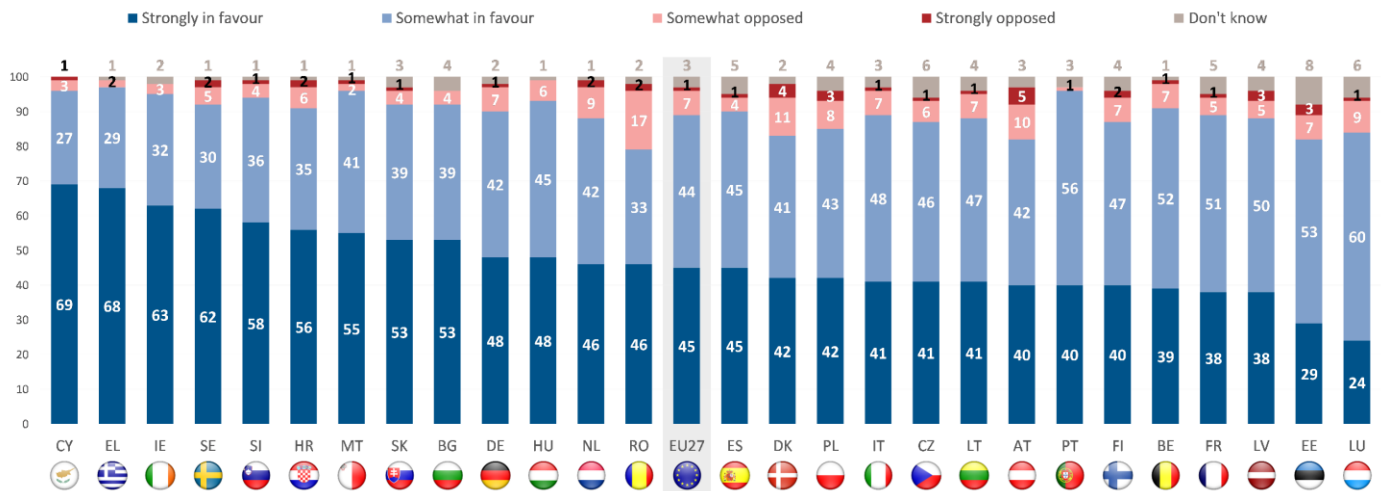



## Special Eurobarometer 527

### Fairness perceptions of the green transition

At least three-quarters of respondents in each country are in favour of encouraging private companies, through rules and incentives, to (1) reduce their emissions faster, (2) switch to more energy-efficient production methods, (3) adopt more circular and sustainable processes and (4) retrain their workforce as needed. Proportions range from 97% in Malta, 96% in Greece and 95% in Ireland and Portugal to 75% in Romania, 78% in Austria and 81% in Finland, Germany and Czechia.

At least six in ten in Cyprus (68%), Greece (61%) and Sweden (60%) are “strongly in favour” of this policy.

QA16.5 To what extent are you for or against the following policies in [OUR COUNTRY] to limit climate change in a way that it is inclusive and fair and leaves no one behind?

Encouraging private companies, through rules and incentives, to (1) reduce their emissions faster, (2) switch to more energy-efficient production methods, (3) adopt more circular and sustainable processes and (4) retrain their workforce as needed

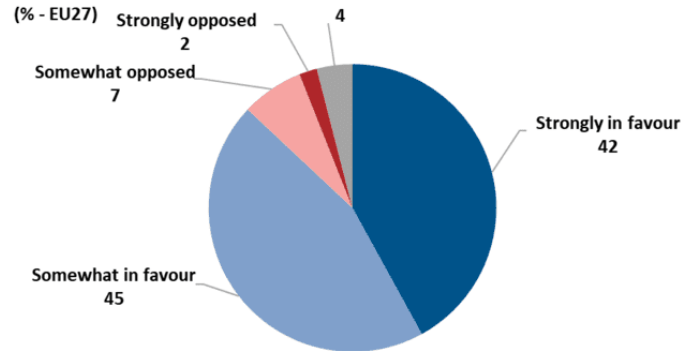

(May / Jun. 2022)

QA16.5 To what extent are you for or against the following policies in [OUR COUNTRY] to limit climate change in a way that it is inclusive and fair and leaves no one behind?  
(% - Encouraging private companies, through rules and incentives, to (1) reduce their emissions faster, (2) switch to more energy-efficient production methods, (3) adopt more circular and sustainable processes and (4) retrain their workforce as needed)

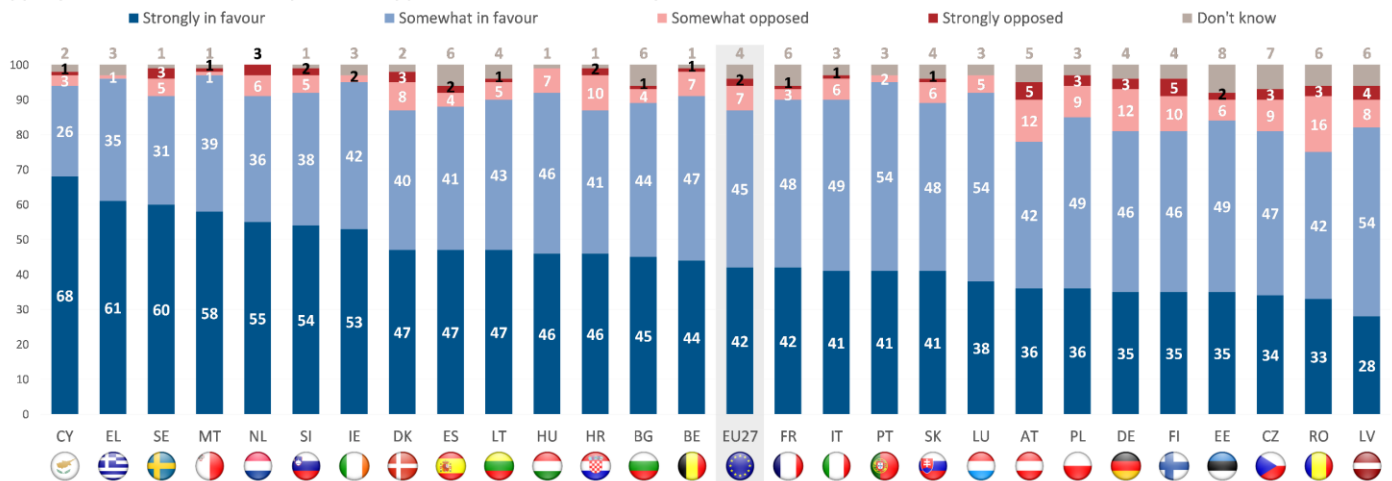

## Special Eurobarometer 527

### Fairness perceptions of the green transition

Given the large majority in favour of most of these policies, it is perhaps not surprising there are few notable differences in the **socio-demographic analysis at EU level**. For example, respondents with higher levels of education, those living in urbanized environments or with a positive view of the EU tend to be more supportive of the proposed policies.

- Respondents with a higher level of education are more likely to be in favour than other groups. As such, respondents with a university level of education constantly show the highest support for proposed policies, except for allocating quotas of energy to citizens to ensure everyone makes their fair share of effort to tackle climate change, where this group has the lowest level of support (59%).
- The more urbanised a respondent's environment, the more likely they are to be in favour of each policy, with the exception of subsidising people to help make their homes more energy efficient (no notable difference). For example, 75% living in large towns are in favour of taxing products and services that contribute most to climate change and redistributing revenues to the poorest and most vulnerable households, compared to 68% living in rural villages.
- Respondents who are self-employed with employees are less likely than those in other employment groups to be in favour of encouraging private companies through rules and incentives to take a range of actions (78%) or of taxing products and services that contribute most to climate change and redistributing revenues to the poorest and most vulnerable households (65%).
- Respondents who have a positive view of the EU are more likely to be in favour of each policy than those with a negative view. For instance, 91% with a positive view of the EU are in favour of encouraging private companies through rules and incentives to take several measures, compared to 80% of those with a negative view.
- Respondents who identify with the Greens/EFA or GUE/NGL tend to be more supportive of the policies to limit climate change in a way that is inclusive and fair. For example, when it comes to taxing products and services that contribute most to climate change and redistributing revenues to the poorest and most vulnerable households, 81% of those identifying with the Greens are in favour, compared to 68% of those identifying with EPP, 66% of those identifying with ECR, or 69% of those identifying with RENEW.

## Special Eurobarometer 527

### Fairness perceptions of the green transition

**QA16** To what extent are you for or against the following policies in [OUR COUNTRY] to limit climate change in a way that it is inclusive and fair and leaves no one behind?  
(% - **Total 'In favour'**)

|                                                                                                                    | Increasing [OUR COUNTRY]'s investments in public transport infrastructure (e.g. trains, buses) | Subsidising people to help make their homes more energy efficient, especially poorer people and the most vulnerable households (insulation, clean heating and cooling, energy production units, etc.) | Encouraging private companies, through rules and incentives, to (1) reduce their emissions faster, (2) switch to more energy-efficient production methods, (3) adopt more circular and sustainable processes and (4) retrain their workforce as needed | Taking products and services that contribute most to climate change, and redistributing revenues to the poorest and most vulnerable households | Allocating a quota of energy to each citizen to ensure everyone makes their fair share of effort to tackle climate change |
|--------------------------------------------------------------------------------------------------------------------|------------------------------------------------------------------------------------------------|-------------------------------------------------------------------------------------------------------------------------------------------------------------------------------------------------------|--------------------------------------------------------------------------------------------------------------------------------------------------------------------------------------------------------------------------------------------------------|------------------------------------------------------------------------------------------------------------------------------------------------|---------------------------------------------------------------------------------------------------------------------------|
| EU27                                                                                                               | 89                                                                                             | 89                                                                                                                                                                                                    | 87                                                                                                                                                                                                                                                     | 71                                                                                                                                             | 62                                                                                                                        |
|  <b>Gender</b>                    |                                                                                                |                                                                                                                                                                                                       |                                                                                                                                                                                                                                                        |                                                                                                                                                |                                                                                                                           |
| Man                                                                                                                | 88                                                                                             | 88                                                                                                                                                                                                    | 86                                                                                                                                                                                                                                                     | 70                                                                                                                                             | 60                                                                                                                        |
| Woman                                                                                                              | 89                                                                                             | 89                                                                                                                                                                                                    | 87                                                                                                                                                                                                                                                     | 72                                                                                                                                             | 65                                                                                                                        |
|  <b>Age</b>                       |                                                                                                |                                                                                                                                                                                                       |                                                                                                                                                                                                                                                        |                                                                                                                                                |                                                                                                                           |
| 15-24                                                                                                              | 89                                                                                             | 90                                                                                                                                                                                                    | 88                                                                                                                                                                                                                                                     | 72                                                                                                                                             | 65                                                                                                                        |
| 25-39                                                                                                              | 90                                                                                             | 90                                                                                                                                                                                                    | 87                                                                                                                                                                                                                                                     | 74                                                                                                                                             | 63                                                                                                                        |
| 40-54                                                                                                              | 89                                                                                             | 89                                                                                                                                                                                                    | 88                                                                                                                                                                                                                                                     | 72                                                                                                                                             | 62                                                                                                                        |
| 55 +                                                                                                               | 89                                                                                             | 88                                                                                                                                                                                                    | 85                                                                                                                                                                                                                                                     | 70                                                                                                                                             | 61                                                                                                                        |
|  <b>Difficulties paying bills</b> |                                                                                                |                                                                                                                                                                                                       |                                                                                                                                                                                                                                                        |                                                                                                                                                |                                                                                                                           |
| Most of the time                                                                                                   | 89                                                                                             | 89                                                                                                                                                                                                    | 86                                                                                                                                                                                                                                                     | 72                                                                                                                                             | 64                                                                                                                        |
| From time to time                                                                                                  | 86                                                                                             | 87                                                                                                                                                                                                    | 85                                                                                                                                                                                                                                                     | 71                                                                                                                                             | 67                                                                                                                        |
| Almost never/ Never                                                                                                | 90                                                                                             | 89                                                                                                                                                                                                    | 88                                                                                                                                                                                                                                                     | 72                                                                                                                                             | 60                                                                                                                        |
| <b>Image of the EU</b>                                                                                             |                                                                                                |                                                                                                                                                                                                       |                                                                                                                                                                                                                                                        |                                                                                                                                                |                                                                                                                           |
| Total 'Positive'                                                                                                   | 93                                                                                             | 92                                                                                                                                                                                                    | 91                                                                                                                                                                                                                                                     | 76                                                                                                                                             | 65                                                                                                                        |
| Neutral                                                                                                            | 87                                                                                             | 87                                                                                                                                                                                                    | 84                                                                                                                                                                                                                                                     | 70                                                                                                                                             | 62                                                                                                                        |
| Total 'Negative'                                                                                                   | 84                                                                                             | 85                                                                                                                                                                                                    | 80                                                                                                                                                                                                                                                     | 61                                                                                                                                             | 50                                                                                                                        |
| <b>Total disposable income - quintile</b>                                                                          |                                                                                                |                                                                                                                                                                                                       |                                                                                                                                                                                                                                                        |                                                                                                                                                |                                                                                                                           |
| 1st quintile                                                                                                       | 87                                                                                             | 88                                                                                                                                                                                                    | 84                                                                                                                                                                                                                                                     | 71                                                                                                                                             | 60                                                                                                                        |
| 2nd quintile                                                                                                       | 90                                                                                             | 89                                                                                                                                                                                                    | 87                                                                                                                                                                                                                                                     | 72                                                                                                                                             | 62                                                                                                                        |
| 3rd quintile                                                                                                       | 90                                                                                             | 90                                                                                                                                                                                                    | 86                                                                                                                                                                                                                                                     | 73                                                                                                                                             | 63                                                                                                                        |
| 4th quintile                                                                                                       | 91                                                                                             | 90                                                                                                                                                                                                    | 89                                                                                                                                                                                                                                                     | 71                                                                                                                                             | 62                                                                                                                        |
| 5th quintile                                                                                                       | 92                                                                                             | 90                                                                                                                                                                                                    | 90                                                                                                                                                                                                                                                     | 70                                                                                                                                             | 60                                                                                                                        |
| <b>Employment status</b>                                                                                           |                                                                                                |                                                                                                                                                                                                       |                                                                                                                                                                                                                                                        |                                                                                                                                                |                                                                                                                           |
| Employed on an open ended contract                                                                                 | 91                                                                                             | 90                                                                                                                                                                                                    | 88                                                                                                                                                                                                                                                     | 72                                                                                                                                             | 63                                                                                                                        |
| Employed on a short-term contract                                                                                  | 87                                                                                             | 88                                                                                                                                                                                                    | 85                                                                                                                                                                                                                                                     | 71                                                                                                                                             | 58                                                                                                                        |
| Employed with a temporary work agency / an online platform                                                         | 84                                                                                             | 83                                                                                                                                                                                                    | 82                                                                                                                                                                                                                                                     | 68                                                                                                                                             | 64                                                                                                                        |
| Self-employed without employees                                                                                    | 90                                                                                             | 90                                                                                                                                                                                                    | 90                                                                                                                                                                                                                                                     | 73                                                                                                                                             | 63                                                                                                                        |
| Self-employed with employees                                                                                       | 89                                                                                             | 85                                                                                                                                                                                                    | 78                                                                                                                                                                                                                                                     | 65                                                                                                                                             | 58                                                                                                                        |
| Unemployed                                                                                                         | 89                                                                                             | 88                                                                                                                                                                                                    | 84                                                                                                                                                                                                                                                     | 72                                                                                                                                             | 63                                                                                                                        |
| Retired                                                                                                            | 89                                                                                             | 88                                                                                                                                                                                                    | 86                                                                                                                                                                                                                                                     | 70                                                                                                                                             | 59                                                                                                                        |
| Looking after home, inactive                                                                                       | 86                                                                                             | 88                                                                                                                                                                                                    | 84                                                                                                                                                                                                                                                     | 69                                                                                                                                             | 62                                                                                                                        |
| Student                                                                                                            | 89                                                                                             | 90                                                                                                                                                                                                    | 89                                                                                                                                                                                                                                                     | 75                                                                                                                                             | 67                                                                                                                        |
| Other                                                                                                              | 86                                                                                             | 95                                                                                                                                                                                                    | 84                                                                                                                                                                                                                                                     | 50                                                                                                                                             | 43                                                                                                                        |
| <b>What is the highest level of education you completed? (ONE ANSWER ONLY)</b>                                     |                                                                                                |                                                                                                                                                                                                       |                                                                                                                                                                                                                                                        |                                                                                                                                                |                                                                                                                           |
| Below secondary                                                                                                    | 82                                                                                             | 82                                                                                                                                                                                                    | 81                                                                                                                                                                                                                                                     | 64                                                                                                                                             | 60                                                                                                                        |
| Secondary                                                                                                          | 89                                                                                             | 89                                                                                                                                                                                                    | 86                                                                                                                                                                                                                                                     | 72                                                                                                                                             | 63                                                                                                                        |
| Post secondary                                                                                                     | 90                                                                                             | 89                                                                                                                                                                                                    | 89                                                                                                                                                                                                                                                     | 71                                                                                                                                             | 62                                                                                                                        |
| University                                                                                                         | 93                                                                                             | 90                                                                                                                                                                                                    | 91                                                                                                                                                                                                                                                     | 74                                                                                                                                             | 59                                                                                                                        |
| <b>Political parties at parliament level</b>                                                                       |                                                                                                |                                                                                                                                                                                                       |                                                                                                                                                                                                                                                        |                                                                                                                                                |                                                                                                                           |
| EPP                                                                                                                | 91                                                                                             | 87                                                                                                                                                                                                    | 86                                                                                                                                                                                                                                                     | 68                                                                                                                                             | 60                                                                                                                        |
| S and D                                                                                                            | 91                                                                                             | 90                                                                                                                                                                                                    | 89                                                                                                                                                                                                                                                     | 76                                                                                                                                             | 66                                                                                                                        |
| ECR                                                                                                                | 86                                                                                             | 87                                                                                                                                                                                                    | 86                                                                                                                                                                                                                                                     | 66                                                                                                                                             | 63                                                                                                                        |
| RENEW                                                                                                              | 88                                                                                             | 89                                                                                                                                                                                                    | 87                                                                                                                                                                                                                                                     | 69                                                                                                                                             | 57                                                                                                                        |
| GUE/NGL                                                                                                            | 91                                                                                             | 94                                                                                                                                                                                                    | 92                                                                                                                                                                                                                                                     | 75                                                                                                                                             | 65                                                                                                                        |
| Greens/EFA                                                                                                         | 94                                                                                             | 92                                                                                                                                                                                                    | 90                                                                                                                                                                                                                                                     | 81                                                                                                                                             | 61                                                                                                                        |
| ID                                                                                                                 | 89                                                                                             | 89                                                                                                                                                                                                    | 84                                                                                                                                                                                                                                                     | 69                                                                                                                                             | 63                                                                                                                        |
| NA (Non affiliated)                                                                                                | 88                                                                                             | 90                                                                                                                                                                                                    | 87                                                                                                                                                                                                                                                     | 73                                                                                                                                             | 68                                                                                                                        |
| None                                                                                                               | 88                                                                                             | 90                                                                                                                                                                                                    | 86                                                                                                                                                                                                                                                     | 70                                                                                                                                             | 63                                                                                                                        |
| Other                                                                                                              | 87                                                                                             | 83                                                                                                                                                                                                    | 88                                                                                                                                                                                                                                                     | 64                                                                                                                                             | 57                                                                                                                        |
| <b>Which of the following best describes the area where you live?</b>                                              |                                                                                                |                                                                                                                                                                                                       |                                                                                                                                                                                                                                                        |                                                                                                                                                |                                                                                                                           |
| A big city                                                                                                         | 92                                                                                             | 91                                                                                                                                                                                                    | 90                                                                                                                                                                                                                                                     | 75                                                                                                                                             | 65                                                                                                                        |
| The suburbs or outskirts of a big city                                                                             | 89                                                                                             | 88                                                                                                                                                                                                    | 87                                                                                                                                                                                                                                                     | 68                                                                                                                                             | 60                                                                                                                        |
| A town or a small city                                                                                             | 89                                                                                             | 88                                                                                                                                                                                                    | 86                                                                                                                                                                                                                                                     | 71                                                                                                                                             | 62                                                                                                                        |
| A country village                                                                                                  | 87                                                                                             | 88                                                                                                                                                                                                    | 84                                                                                                                                                                                                                                                     | 68                                                                                                                                             | 59                                                                                                                        |
| A farm or home in the countryside                                                                                  | 89                                                                                             | 89                                                                                                                                                                                                    | 86                                                                                                                                                                                                                                                     | 66                                                                                                                                             | 56                                                                                                                        |

# CONCLUSION

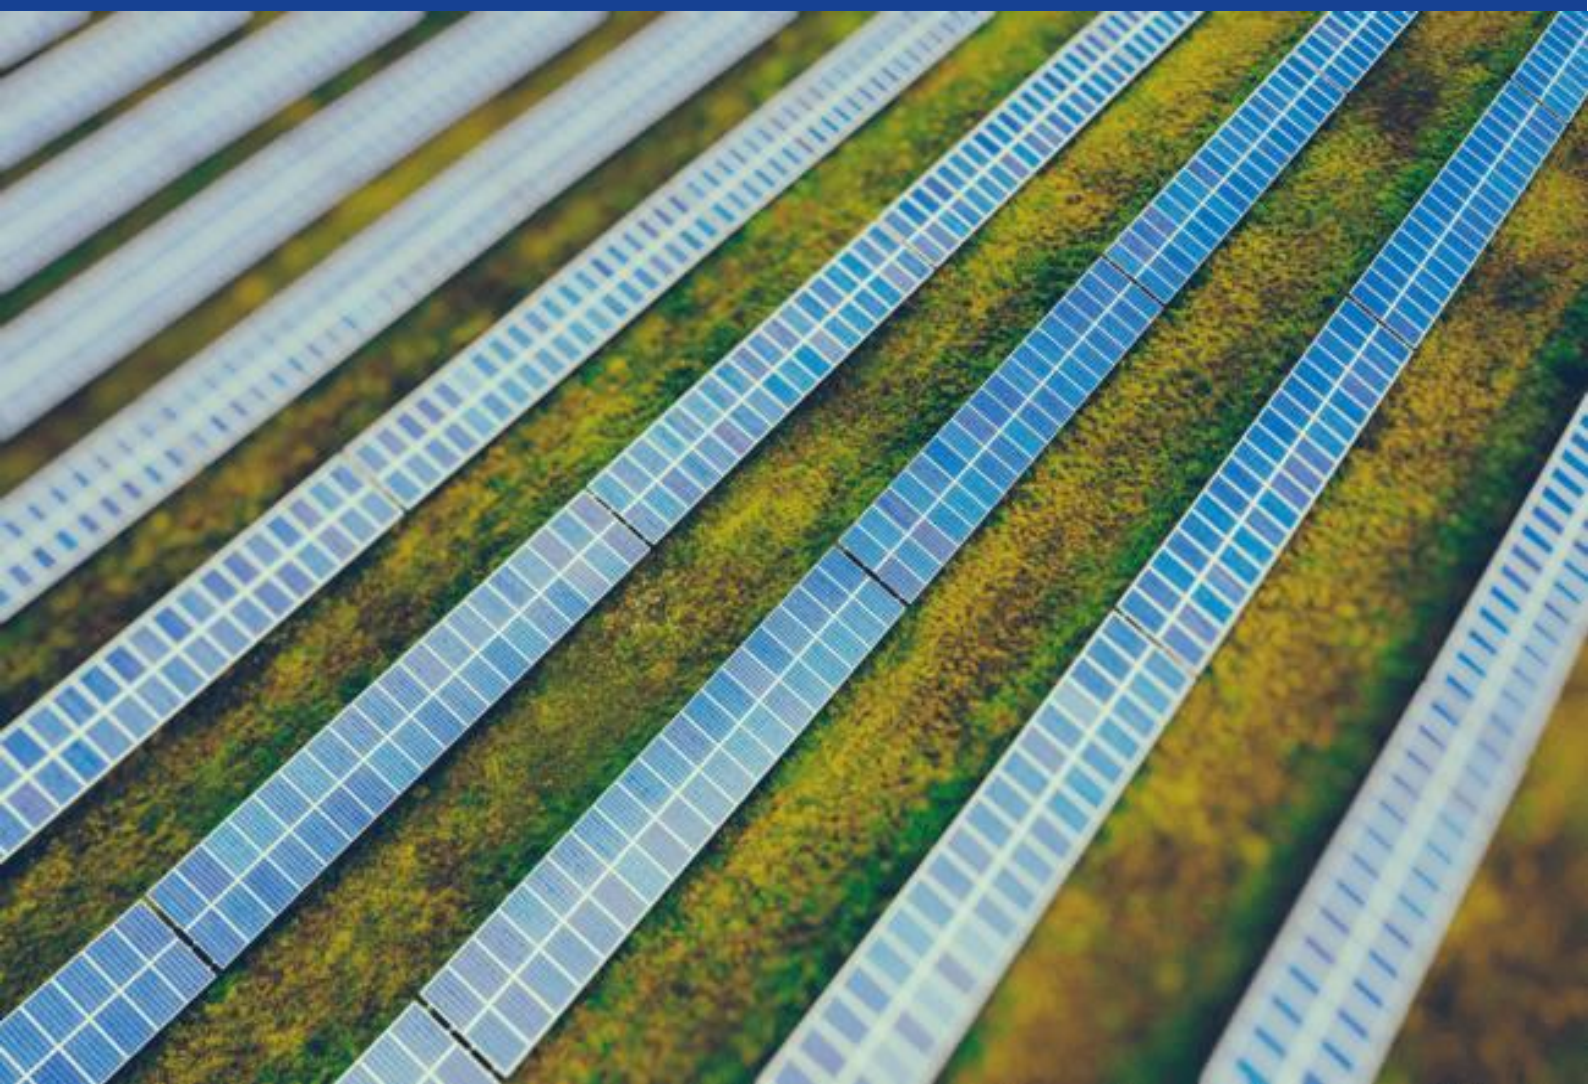



## Special Eurobarometer 527

### Perceptions of the green transition

The results of this survey reveal the large support EU citizens have for a green transition that leaves no one behind. EU citizens confirmed that there is a potential for energy savings while expressing strong concerns about the high energy prices and the need for more action, including support to the most vulnerable households.

In the first part of this report, we examined Europeans' views on the fairness dimension of the green transition. Almost nine in ten Europeans agree that the green transition should leave no one behind. Yet less than half of Europeans are confident that by 2050, sustainable energy, products and services will be affordable for everyone, including people with lower disposable income. Half of EU citizens think the EU or their regional, city or local authorities are doing enough to ensure a fair green transition. Almost half say this about their national government, while around four in ten think private companies and businesses are doing enough.

More than half of Europeans think that climate policies will create more new jobs than they will remove and that these newly created jobs will be of good quality. Just over half say being in a job contributing to the green transition is important to them and a similar share feel their current skills allow them to contribute to it. Yet only one third think their current job contributes to advancing the green transition. Europeans with lower educational levels are less likely to feel they have the skills to contribute to the green transition and are less optimistic about the impact of the green transition on jobs.

Climate change frightens seven out of ten Europeans. Nearly eight in ten Europeans feel a personal responsibility to act to limit climate change, and seven in ten think they should personally do more, regardless of what others do.

The second part of this report explored Europeans' perceptions of the current energy context. More than nine in ten Europeans think that the current level of energy prices for people in their country is a serious problem. Around eight in ten say the cost of fuel and energy for their household transport and energy needs is a serious problem for them personally. Over half of Europeans are confident they could use less energy than they do now. Six in ten say they would reduce their energy use mainly for economic reasons, while just above a third would do so mainly for environmental reasons. European people with lower disposable income are less confident they can reduce their energy use and are more likely to say current energy prices are a problem. Less well-off EU citizens are also more likely to mention economic reasons as a motivation for reducing energy consumption and less likely to mention environmental reasons. Half of the respondents (50%) think the richest 50% should make more effort to reduce their energy use.

The third part of this report focused on more specific dimensions important for citizens to thrive in the green transition notably housing, transport and access to green spaces. Four in ten believe their home needs an energy efficiency renovation and just over one-third have made home energy efficiency improvements in the past five years. In the last five years, only one in ten respondents have received financial assistance to improve the energy efficiency of their home. Being unable to afford the cost is seen by Europeans as the main barrier to making the home more energy efficient, although almost three in ten say they do not have enough information about the cost or added value.

The majority of respondents rate the quality, affordability and availability of public transport in their local area as good. Yet, satisfaction is much lower in rural areas compared to more urban areas as concerns all dimensions (availability, quality and affordability), in particular availability. The key to encouraging people to adopt a more sustainable transport option is more frequent public transport, followed by more affordable, faster public transport and new or better-designed routes.

Most respondents live within ten minutes' walk of a good quality green space. The differences in access vary, also based on the financial situation, with poorer Europeans living more often further away from a green space. The satisfaction with the nearest green space is to some extent lower in urban areas.

The last part of this report assessed how Europeans favour certain policies designed to make the green transition fair. Seven in ten favour taxing the most polluting products and services and redistributing revenues to the poorest and most vulnerable households. More than six out of ten Europeans are in favour of allocating a quota of energy to each citizen to ensure everyone makes their fair share of effort to tackle climate change. Almost nine in ten respondents favour subsidising people to help make their homes more energy efficient, especially those with lower disposable income and the most vulnerable households or encouraging private companies through rules and incentives to take various measures, including faster emissions reductions and more circular and sustainable practices. Nine in ten Europeans favour increasing their country's investments in public transport infrastructure.

# TECHNICAL SPECIFICATIONS

Between the 30<sup>th</sup> of May and 28<sup>th</sup> of June 2022, Kantar carried out wave 97.4 of the EUROBAROMETER survey at the request of the European Commission, Directorate-General for Communication, "Media monitoring and Eurobarometer" Unit.

Wave 97.4 covers the population of the respective nationalities of the European Union Member States, residents in each of the 27 Member States and aged 15 years and over.

The basic sample design applied in all countries and territories is a multi-stage, random (probability) one. In each country, a number of sampling points were drawn with probability proportional to population size (for a total coverage of the country) and to population density.

In order to do so, the sampling points were drawn systematically from each of the "administrative regional units" after stratification by individual unit and type of area. They thus represent the whole territory of the countries surveyed according to the EUROSTAT NUTS II (or equivalent) and according to the distribution of the resident population of the respective nationalities in terms of metropolitan, urban and rural areas<sup>36</sup>.

In each of the selected sampling points, a starting address was drawn at random. Further addresses (every 'N'th address) were selected by standard "random route" procedures from the initial address. In each household, the respondent was drawn at random (following the "closest birthday rule"). If no one answered the interviewer in a household, or if the respondent selected was not available (not present or busy), the interviewer revisited the same household up to three additional times (four contact attempts in total). Interviewers never indicate that the survey is conducted on behalf of the European Commission beforehand; they may give this information once the survey is completed, upon request.

The recruitment phase was slightly different in the Netherlands, Finland, and Sweden. In these countries, a sample of addresses within each areal sampling point (1km<sup>2</sup> grid) was selected from the address or population register (in Finland, the selection is not made in all sample points, but in somewhere, response rates are expected to improve). The selection of addresses was made in a random manner. Households were then contacted by telephone and recruited to take part in the survey. In the Netherlands, a dual frame RDD sample (mobile and landline numbers) is used. The selection of numbers on both frames is made in a random manner, with each number getting an equal probability of selection. Unlike Sweden and Finland, the sample is un-clustered. Please see the figure below.

---

<sup>36</sup> Urban Rural classification based on DEGURBA  
(<https://ec.europa.eu/eurostat/web/degree-of-urbanisation/background>)

**Special Eurobarometer 527**  
**Perceptions of the green transition**

|            | COUNTRIES      | INSTITUTES                                       | N°<br>INTERVIEWS | FIELDWORK<br>DATES |            | POPULATION<br>15+ | PROPORTION<br>EU27 |
|------------|----------------|--------------------------------------------------|------------------|--------------------|------------|-------------------|--------------------|
| BE         | Belgium        | Mobiel Centre Market Research                    | 1,004            | 30/05/2022         | 28/06/2022 | 9,915,439         | 2.53%              |
| BG         | Bulgaria       | Kantar TNS BBSS                                  | 1,027            | 30/05/2022         | 26/06/2022 | 6,094,974         | 1.55%              |
| CZ         | Czechia        | Kantar Czechia                                   | 1,002            | 31/05/2022         | 26/06/2022 | 9,190,342         | 2.34%              |
| DK         | Denmark        | Kantar Gallup                                    | 1,004            | 31/05/2022         | 21/06/2022 | 4,994,008         | 1.27%              |
| DE         | Germany        | Kantar Deutschland                               | 1,520            | 01/06/2022         | 22/06/2022 | 74,162,306        | 18.89%             |
| EE         | Estonia        | Kantar Estonia                                   | 1,001            | 31/05/2022         | 27/06/2022 | 1,145,208         | 0.29%              |
| IE         | Ireland        | B and A Research                                 | 1,022            | 02/06/2022         | 27/06/2022 | 4,039,401         | 1.03%              |
| EL         | Greece         | Kantar Greece                                    | 1,015            | 31/05/2022         | 25/06/2022 | 9,568,462         | 2.44%              |
| ES         | Spain          | TNS Investigación de Mercados y Opinión          | 1,005            | 02/06/2022         | 26/06/2022 | 42,022,835        | 10.70%             |
| FR         | France         | Kantar Public France                             | 1,001            | 31/05/2022         | 23/06/2022 | 57,553,554        | 14.66%             |
| HR         | Croatia        | Hendal                                           | 1,001            | 31/05/2022         | 26/06/2022 | 3,569,904         | 0.91%              |
| IT         | Italy          | Kantar Italia                                    | 1,028            | 01/06/2022         | 22/06/2022 | 54,102,101        | 13.78%             |
| CY         | Rep. Of Cyprus | CYMAR Market Research                            | 504              | 31/05/2022         | 16/06/2022 | 759,844           | 0.19%              |
| LV         | Latvia         | Kantar TNS Latvia                                | 1,000            | 30/05/2022         | 20/06/2022 | 1,649,459         | 0.42%              |
| LT         | Lithuania      | TNS LT                                           | 1,000            | 30/05/2022         | 26/06/2022 | 2,445,153         | 0.62%              |
| LU         | Luxembourg     | TNS Ilres                                        | 505              | 31/05/2022         | 26/06/2022 | 538,288           | 0.14%              |
| HU         | Hungary        | Kantar Hoffmann                                  | 1,031            | 01/06/2022         | 20/06/2022 | 8,547,786         | 2.18%              |
| MT         | Malta          | MISCO International                              | 503              | 30/05/2022         | 21/06/2022 | 455,041           | 0.12%              |
| NL         | Netherlands    | Kantar Netherlands                               | 1,039            | 30/05/2022         | 20/06/2022 | 15,067,518        | 3.84%              |
| AT         | Austria        | Das Österreichische Gallup Institut              | 1,011            | 30/05/2022         | 14/06/2022 | 7,844,329         | 2.00%              |
| PL         | Poland         | Kantar Polska                                    | 1,014            | 31/05/2022         | 23/06/2022 | 32,904,839        | 8.38%              |
| PT         | Portugal       | Marktest – Marketing, Organização e Formação     | 1,000            | 01/06/2022         | 26/06/2022 | 9,221,533         | 2.35%              |
| RO         | Romania        | Centrul Pentru Studierea Opiniei si Piete (CSOP) | 1,056            | 30/05/2022         | 24/06/2022 | 16,701,193        | 4.25%              |
| SI         | Slovenia       | Mediana DOO                                      | 1,009            | 31/05/2022         | 20/06/2022 | 1,834,195         | 0.47%              |
| SK         | Slovakia       | Kantar Czechia                                   | 1,004            | 31/05/2022         | 19/06/2022 | 4,677,729         | 1.19%              |
| FI         | Finland        | Taloustutkimus Oy                                | 1,044            | 31/05/2022         | 26/06/2022 | 4,805,266         | 1.22%              |
| SE         | Sweden         | Kantar Sifo                                      | 1,045            | 31/05/2022         | 26/06/2022 | 8,756,024         | 2.23%              |
| TOTAL EU27 |                |                                                  | 26,395           | 30/05/2022         | 28/06/2022 | 392,566,731       | 100%               |

\* It should be noted that the total percentage shown in this table may exceed 100% due to rounding.

## Special Eurobarometer 527

### Perceptions of the green transition

|            | COUNTRIES      | N° OF CAPI INTERVIEWS | N° OF CAWI INTERVIEWS | TOTAL N° INTERVIEWS |
|------------|----------------|-----------------------|-----------------------|---------------------|
| BE         | Belgium        | 689                   | 315                   | 1,004               |
| BG         | Bulgaria       | 1,027                 |                       | 1,027               |
| CZ         | Czechia        | 600                   | 402                   | 1,002               |
| DK         | Denmark        | 505                   | 499                   | 1,004               |
| DE         | Germany        | 1,520                 |                       | 1,520               |
| EE         | Estonia        | 865                   | 136                   | 1,001               |
| IE         | Ireland        | 1,022                 |                       | 1,022               |
| EL         | Greece         | 1,015                 |                       | 1,015               |
| ES         | Spain          | 1,005                 |                       | 1,005               |
| FR         | France         | 1,001                 |                       | 1,001               |
| HR         | Croatia        | 1,001                 |                       | 1,001               |
| IT         | Italy          | 1,028                 |                       | 1,028               |
| CY         | Rep. Of Cyprus | 504                   |                       | 504                 |
| LV         | Latvia         | 412                   | 588                   | 1,000               |
| LT         | Lithuania      | 1,000                 |                       | 1,000               |
| LU         | Luxembourg     | 505                   |                       | 505                 |
| HU         | Hungary        | 1,031                 |                       | 1,031               |
| MT         | Malta          | 308                   | 195                   | 503                 |
| NL         | Netherlands    | 639                   | 400                   | 1,039               |
| AT         | Austria        | 1,011                 |                       | 1,011               |
| PL         | Poland         | 1,014                 |                       | 1,014               |
| PT         | Portugal       | 1,000                 |                       | 1,000               |
| RO         | Romania        | 1,056                 |                       | 1,058               |
| SI         | Slovenia       | 601                   | 408                   | 1,009               |
| SK         | Slovakia       | 1,004                 |                       | 1,004               |
| FI         | Finland        | 503                   | 541                   | 1,044               |
| SE         | Sweden         | 433                   | 612                   | 1,045               |
| TOTAL EU27 |                | 22,299                | 4,096                 | 26,395              |

CAPI : Computer-Assisted Personal interviewing

CAWI : Computer-Assisted Web interviewing

### Consequences of the coronavirus pandemic on fieldwork

#### Face-to-face interviewing

Where feasible, interviews were conducted face to face in people's homes or on their doorstep and in the appropriate national language. In all countries and territories where face-to-face interviewing was not feasible, CAWI (Computer-Assisted Web Interviewing) was used.

For face-to-face interviews conducted, hygiene and physical distancing measures were respected at all times in line with government regulations, and whenever possible, interviews were conducted outside homes, on doorsteps, in order to stay outside and maintain social distance.

#### Face-to-face and online interviewing

In Belgium, Czechia, Denmark, Estonia, Latvia, Malta, the Netherlands, Slovenia, Finland and Sweden, face-to-face interviewing was feasible, but it was not possible to reach the target number of face-to-face interviews within the fieldwork period due to the long-lasting impacts of COVID-19 pandemic, many potential respondents are still reluctant to open their homes to interviewers, even if they respect hygiene rules and physical distancing, such as wearing masks and using hydro-alcoholic gel. Therefore, to hit the target number of interviews within the fieldwork period, additional interviews were conducted online with Computer-Assisted Web Interviewing (CAWI) technique.

### Recruitment for online interviews

The online design in each country differed based on what was feasible within the fieldwork period. Where feasible, the online sample was based on a probabilistic sample design. Those recruited to the online survey were recruited through a single mobile frame or dual frame Random Digit Dialling (RDD) design. In this way, the entire phone-owning population in each country had a non-zero chance of being sampled. The choice of whether to use a single mobile frame or dual frame (mobile and landline) was dependent on the countries' landline infrastructure. Where the landline infrastructure is suitably advanced to support a significant minority of residential households with landline phones, a dual-frame design is employed. The mix of mobile and landline samples is designed to maximise the representation of the responding sample. The RDD sample for both the mobile and landline samples is drawn from the country's telephone numbering plan. The landline sample frame is stratified by NUTS3 regions based on their prefix, and the mobile by an operator before a systematic random sample of numbers is generated proportional in size to the total generatable numbers in each stratum. Respondents were recruited using this sample design in Belgium, Czechia, Latvia, Lithuania, Malta and Slovenia.

In Finland, Denmark, and Sweden, RDD samples were not used; instead, the telephone sample was drawn from the country telephone directory. In these three countries, the telephone directories offer comprehensive coverage of the phone-owning population, storing both landline and mobile phone numbers for each individual.

In the Netherlands, two survey modes were used to collect responses, face-to-face and online. For the online mode, the respondents were initially recruited to take part through an offline mode of recruitment via a probability-based dual frame overlapping RDD sample design. In this way, the entire phone-owning population in the Netherlands had a non-zero chance of being sampled. The mix of mobile and landline samples is designed to maximise the representation of the responding sample. The RDD sample for both the mobile and landline samples is drawn from the country's telephone numbering plan. The landline sample frame is stratified by NUTS3 regions based on their prefix, and the mobile by an operator before a systematic random sample of numbers is generated proportional in size to the total generatable numbers in each stratum.

### Response rates

For each country, a comparison between the responding sample and the universe (i.e. the overall population in the country) is carried out. Weights are used to match the responding sample to the universe on gender by age, region and degree of urbanisation. For European estimates (i.e. EU average), an adjustment is made to the individual country weights, weighting them up or down to reflect their 15+ population as a proportion of the EU 15+ population.



## Special Eurobarometer 527

### Perceptions of the green transition

The response rates are calculated by dividing the total number of complete interviews by the number of all the addresses visited, apart from ones that are not eligible but include those where eligibility is unknown. For wave 97.4 of the EUROBAROMETER survey, the response rates for the EU27 countries, calculated by Kantar, are displayed in the table on the right.

#### Margins of error

Readers are reminded that survey results are estimations, the accuracy of which, everything being equal, rests upon the sample size and upon the observed percentage. With samples of about 1,000 interviews, the real percentages vary within the following confidence limits. This is reflected in the table with the statistical margins below.

| COUNTRIES |                | CAPI<br>Response rates | CAWI<br>Response rates |
|-----------|----------------|------------------------|------------------------|
| BE        | Belgium        | 59.0%                  | 16.4%                  |
| BG        | Bulgaria       | 45.2%                  |                        |
| CZ        | Czechia        | 44.8%                  | 34.3%                  |
| DK        | Denmark        | 46.3%                  | 16.1%                  |
| DE        | Germany        | 22.6%                  |                        |
| EE        | Estonia        | 40.0%                  | 17.1%                  |
| IE        | Ireland        | 49.8%                  |                        |
| EL        | Greece         | 29.2%                  |                        |
| ES        | Spain          | 34.1%                  |                        |
| FR        | France         | 32.3%                  |                        |
| HR        | Croatia        | 44.1%                  |                        |
| IT        | Italy          | 24.4%                  |                        |
| CY        | Rep. Of Cyprus | 50.1%                  |                        |
| LV        | Latvia         | 44.4%                  | 17.9%                  |
| LT        | Lithuania      | 43.6%                  |                        |
| LU        | Luxembourg     | 24.4%                  |                        |
| HU        | Hungary        | 64.4%                  |                        |
| MT        | Malta          | 73.0%                  | 24.3%                  |
| NL        | Netherlands    | 66.3%                  | 41.3%                  |
| AT        | Austria        | 44.8%                  |                        |
| PL        | Poland         | 45.3%                  |                        |
| PT        | Portugal       | 39.1%                  |                        |
| RO        | Romania        | 61.2%                  |                        |
| SI        | Slovenia       | 54.1%                  | 29.4%                  |
| SK        | Slovakia       | 66.0%                  |                        |
| FI        | Finland        | 34.8%                  | 28.8%                  |
| SE        | Sweden         | 65.3%                  | 23.4%                  |

CAPI : Computer-Assisted Personal interviewing

CAWI : Computer-Assisted Web interviewing (CAWI RRs do not include the recruitment phase)

#### Statistical Margins due to the sampling process

(at the 95% level of confidence)

various sample sizes are in rows

various observed results are in columns

|               | 5%         | 10%        | 15%        | 20%        | 25%        | 30%        | 35%        | 40%        | 45%        | 50%        |               |
|---------------|------------|------------|------------|------------|------------|------------|------------|------------|------------|------------|---------------|
|               | 95%        | 90%        | 85%        | 80%        | 75%        | 70%        | 65%        | 60%        | 55%        | 50%        |               |
| N=50          | 6,0        | 8,3        | 9,9        | 11,1       | 12,0       | 12,7       | 13,2       | 13,6       | 13,8       | 13,9       | N=50          |
| N=500         | 1,9        | 2,6        | 3,1        | 3,5        | 3,8        | 4,0        | 4,2        | 4,3        | 4,4        | 4,4        | N=500         |
| <b>N=1000</b> | <b>1,4</b> | <b>1,9</b> | <b>2,2</b> | <b>2,5</b> | <b>2,7</b> | <b>2,8</b> | <b>3,0</b> | <b>3,0</b> | <b>3,1</b> | <b>3,1</b> | <b>N=1000</b> |
| N=1500        | 1,1        | 1,5        | 1,8        | 2,0        | 2,2        | 2,3        | 2,4        | 2,5        | 2,5        | 2,5        | N=1500        |
| N=2000        | 1,0        | 1,3        | 1,6        | 1,8        | 1,9        | 2,0        | 2,1        | 2,1        | 2,2        | 2,2        | N=2000        |
| N=3000        | 0,8        | 1,1        | 1,3        | 1,4        | 1,5        | 1,6        | 1,7        | 1,8        | 1,8        | 1,8        | N=3000        |
| N=4000        | 0,7        | 0,9        | 1,1        | 1,2        | 1,3        | 1,4        | 1,5        | 1,5        | 1,5        | 1,5        | N=4000        |
| N=5000        | 0,6        | 0,8        | 1,0        | 1,1        | 1,2        | 1,3        | 1,3        | 1,4        | 1,4        | 1,4        | N=5000        |
| N=6000        | 0,6        | 0,8        | 0,9        | 1,0        | 1,1        | 1,2        | 1,2        | 1,2        | 1,3        | 1,3        | N=6000        |
| N=7000        | 0,5        | 0,7        | 0,8        | 0,9        | 1,0        | 1,1        | 1,1        | 1,1        | 1,2        | 1,2        | N=7000        |
| N=7500        | 0,5        | 0,7        | 0,8        | 0,9        | 1,0        | 1,0        | 1,1        | 1,1        | 1,1        | 1,1        | N=7500        |
| N=8000        | 0,5        | 0,7        | 0,8        | 0,9        | 0,9        | 1,0        | 1,0        | 1,1        | 1,1        | 1,1        | N=8000        |
| N=9000        | 0,5        | 0,6        | 0,7        | 0,8        | 0,9        | 0,9        | 1,0        | 1,0        | 1,0        | 1,0        | N=9000        |
| N=10000       | 0,4        | 0,6        | 0,7        | 0,8        | 0,8        | 0,9        | 0,9        | 1,0        | 1,0        | 1,0        | N=10000       |
| N=11000       | 0,4        | 0,6        | 0,7        | 0,7        | 0,8        | 0,9        | 0,9        | 0,9        | 0,9        | 0,9        | N=11000       |
| N=12000       | 0,4        | 0,5        | 0,6        | 0,7        | 0,8        | 0,8        | 0,9        | 0,9        | 0,9        | 0,9        | N=12000       |
| N=13000       | 0,4        | 0,5        | 0,6        | 0,7        | 0,7        | 0,8        | 0,8        | 0,8        | 0,9        | 0,9        | N=13000       |
| N=14000       | 0,4        | 0,5        | 0,6        | 0,7        | 0,7        | 0,8        | 0,8        | 0,8        | 0,8        | 0,8        | N=14000       |
| N=15000       | 0,3        | 0,5        | 0,6        | 0,6        | 0,7        | 0,7        | 0,8        | 0,8        | 0,8        | 0,8        | N=15000       |
|               | 5%         | 10%        | 15%        | 20%        | 25%        | 30%        | 35%        | 40%        | 45%        | 50%        |               |
|               | 95%        | 90%        | 85%        | 80%        | 75%        | 70%        | 65%        | 60%        | 55%        | 50%        |               |

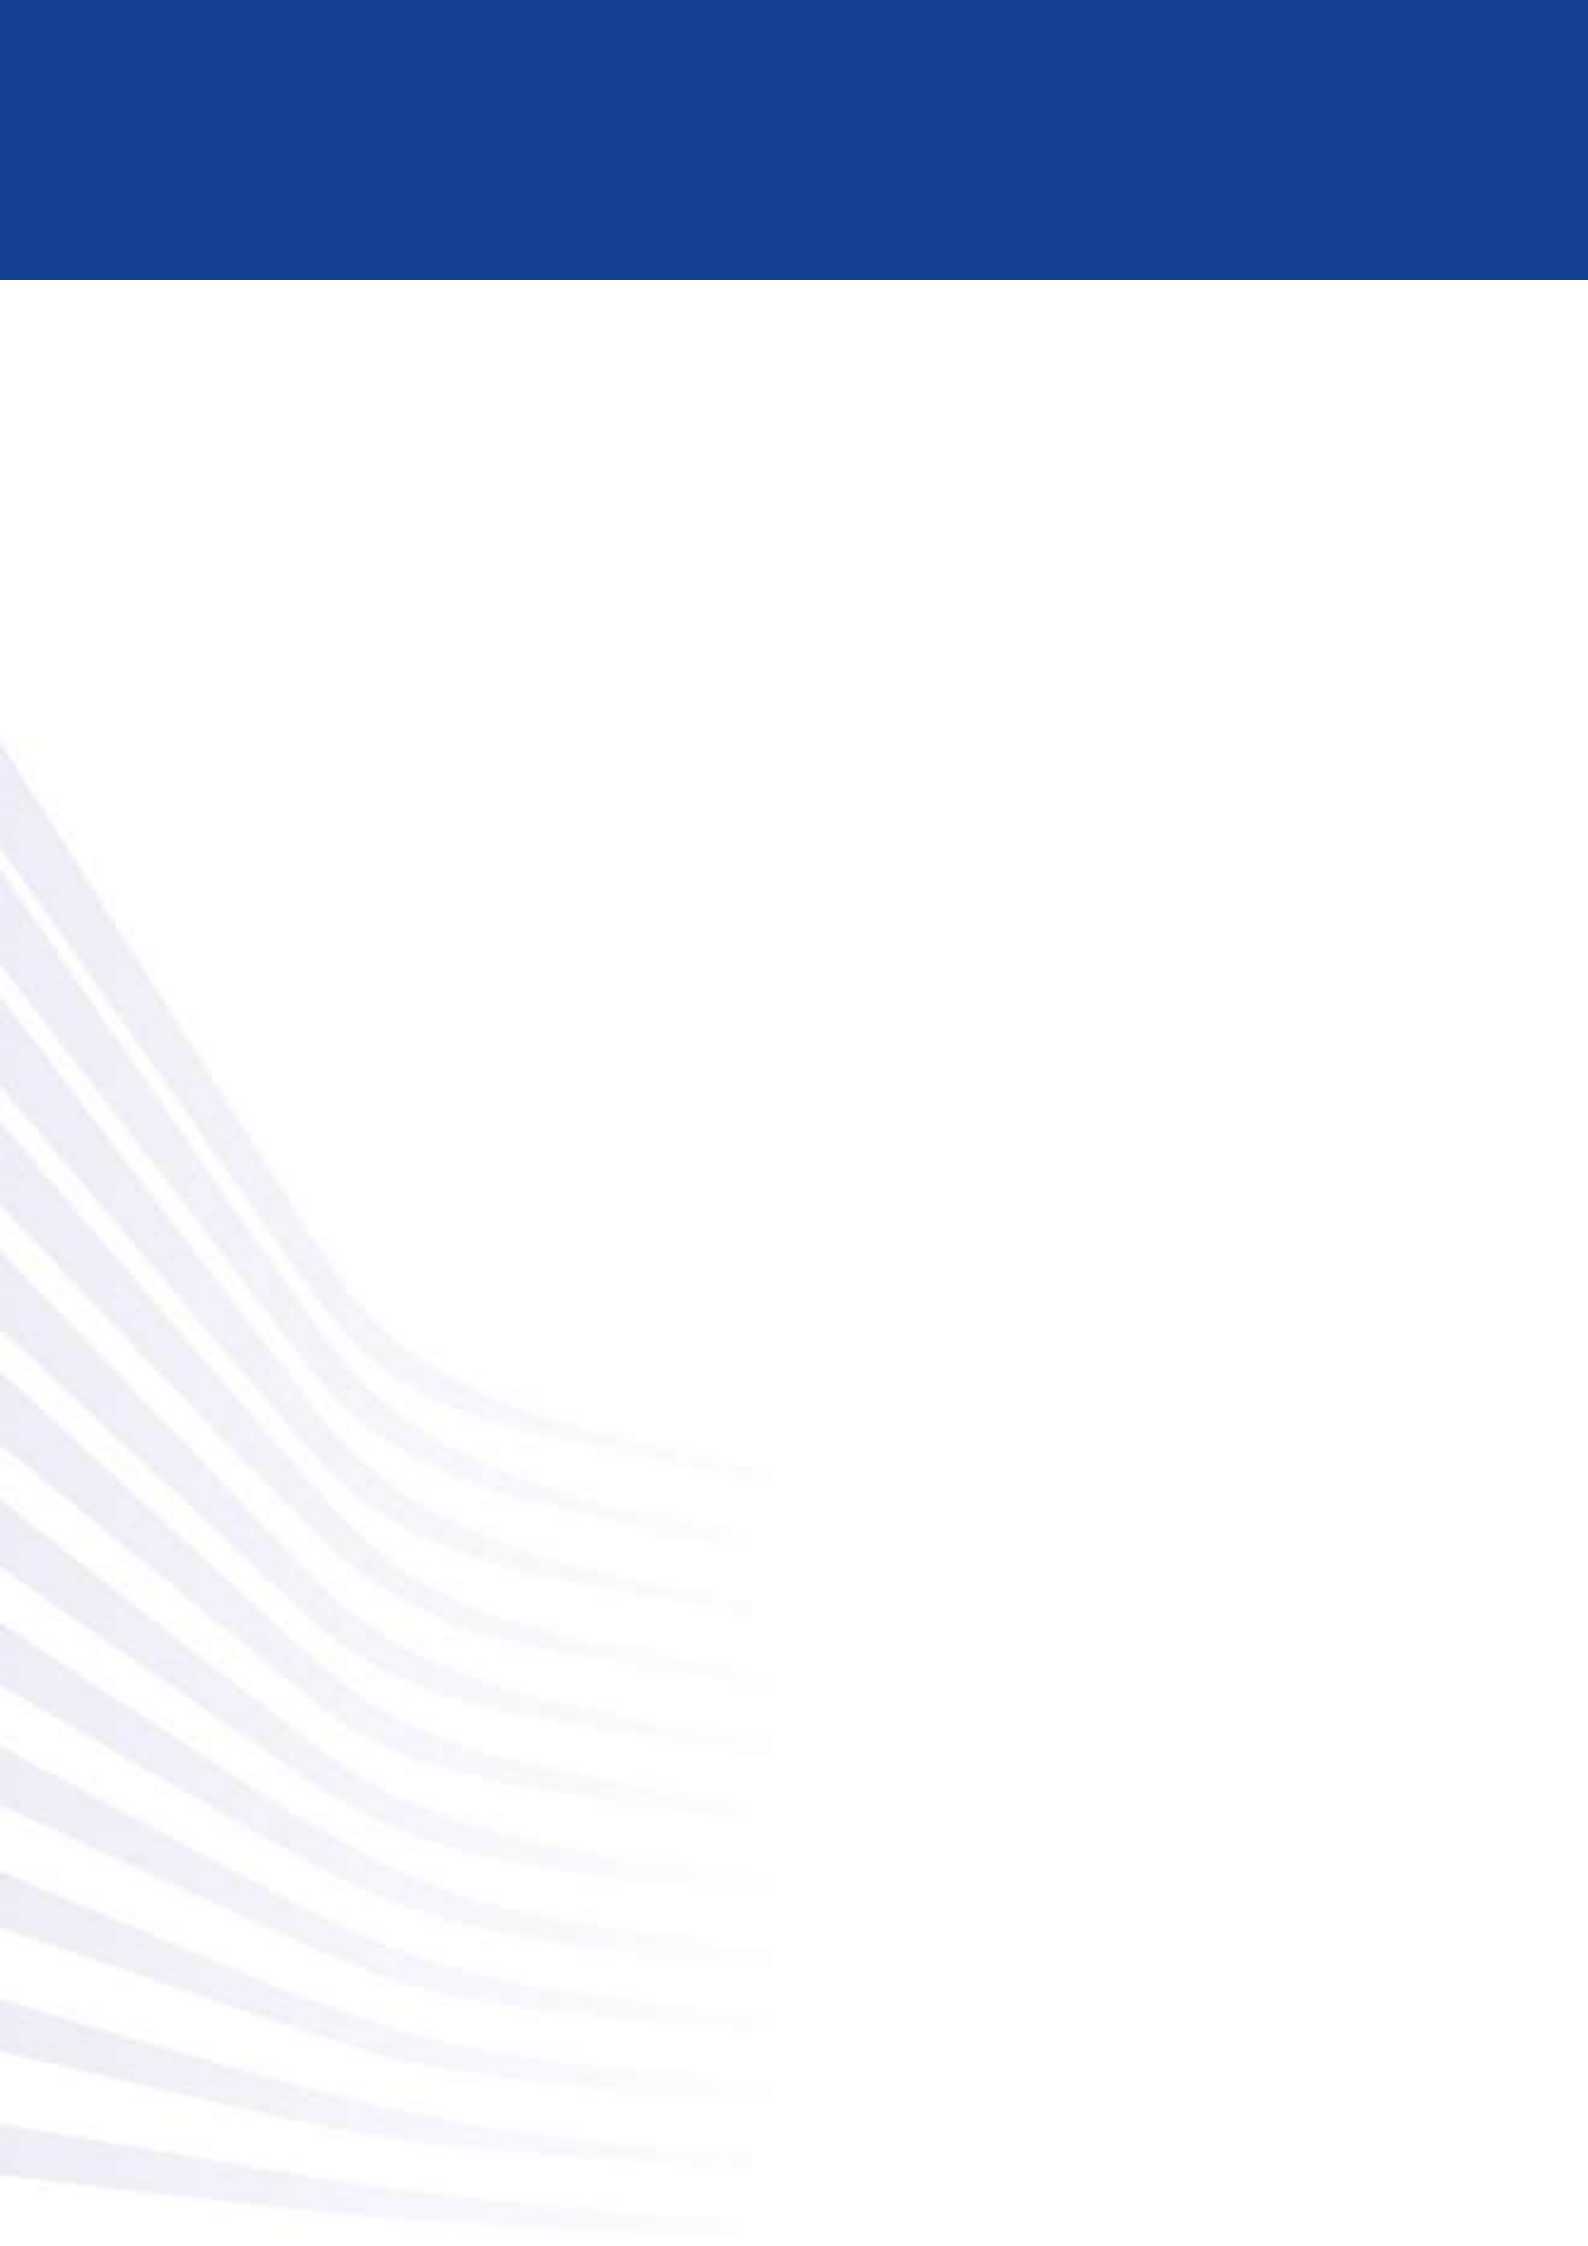

Supplement: Supplementary file 39 [file Fairness_perception_green_transition_2022_ebs_527_report_en.pdf › code/data/eu_surveys/Fairness_perception_green_transition_2022_ebs_527_report_en.pdf]
