# Supplementary material for: Considering justice as a planning principle helps navigate a diversity of future energy infrastructure designs
Source: Research Square preprint supplement (doi:10.21203/rs.3.rs-4256136/v1), 2024-12-18
Supplement: Supplementary file 1 [file Fairness_perception_green_transition_2022_ebs_527_volume_A.xlsx]

## Sheet: Content
Project:	Eurobarometer
Wave:	97.4
Fieldwork:	30/05 - 28/06/2022
Sheet	Question French	Question English
B	B. Pays de terrain	B. Fieldwork country
QA1_1	QA1.1. Dans quelle mesure êtes-vous d’accord ou pas d’accord avec les affirmations suivantes ? :-Vous ressentez personnellement la responsabilité d’essayer de réduire le changement climatique	QA1.1. To what extent do you agree or disagree with the following statements? :-You feel a personal responsibility to act to limit climate change
QA1_2	QA1.2. Dans quelle mesure êtes-vous d’accord ou pas d’accord avec les affirmations suivantes ? :-La transition écologique ne devrait laisser personne de côté	QA1.2. To what extent do you agree or disagree with the following statements? :-The green transition should not leave anyone behind
QA1_3	QA1.3. Dans quelle mesure êtes-vous d’accord ou pas d’accord avec les affirmations suivantes ? :-Le changement climatique est quelque chose qui vous fait peur	QA1.3. To what extent do you agree or disagree with the following statements? :-Climate change is something that frightens you
QA1_4	QA1.4. Dans quelle mesure êtes-vous d’accord ou pas d’accord avec les affirmations suivantes ? :-Vous avez confiance dans le fait que, d’ici à 2050, l’énergie, les produits et les services durables seront abordables pour tous, y compris pour les plus pauvres	QA1.4. To what extent do you agree or disagree with the following statements? :-You are confident that by 2050 sustainable energy, products and services will be affordable for everyone, including poorer people
QA2_1	QA2.1. Dans quelle mesure êtes-vous d’accord ou pas d’accord avec le fait que chacun des acteurs suivants en fait assez pour s’assurer que la transition écologique est socialement juste ? :-Les entreprises et sociétés privées	QA2.1. To what extent do you agree or disagree that each of the following actors is doing enough to ensure that the green transition is fair? :-Private companies, businesses
QA2_2	QA2.2. Dans quelle mesure êtes-vous d’accord ou pas d’accord avec le fait que chacun des acteurs suivants en fait assez pour s’assurer que la transition écologique est socialement juste ? :-Les autorités publiques locales, régionales ou municipales	QA2.2. To what extent do you agree or disagree that each of the following actors is doing enough to ensure that the green transition is fair? :-Your regional, city or local public authorities
QA2_3	QA2.3. Dans quelle mesure êtes-vous d’accord ou pas d’accord avec le fait que chacun des acteurs suivants en fait assez pour s’assurer que la transition écologique est socialement juste ? :-Le Gouvernement (NATIONALITÉ)	QA2.3. To what extent do you agree or disagree that each of the following actors is doing enough to ensure that the green transition is fair? :-The (NATIONALITY) government
QA2_4	QA2.4. Dans quelle mesure êtes-vous d’accord ou pas d’accord avec le fait que chacun des acteurs suivants en fait assez pour s’assurer que la transition écologique est socialement juste ? :-L’UE	QA2.4. To what extent do you agree or disagree that each of the following actors is doing enough to ensure that the green transition is fair? :-The EU
QA3_1	QA3.1. Dans quelle mesure êtes-vous d’accord ou pas d’accord avec les affirmations suivantes concernant la transition écologique et la lutte contre le changement climatique ? :-Vous devriez vous-même en faire plus que ce que vous faites actuellement pour contribuer à la transition écologique et lutter contre le changement climatique (en consommant moins ou en économisant l’énergie par exemple), s…	QA3.1. To what extent do you agree or disagree with the following statements about the green transition and the fight against climate change? :-You should personally do more than you currently do to contribute to the green transition and tackling climate change (by consuming less or saving energy for example), regardless of what others do.
QA3_2	QA3.2. Dans quelle mesure êtes-vous d’accord ou pas d’accord avec les affirmations suivantes concernant la transition écologique et la lutte contre le changement climatique ? :-Vous n’avez pas besoin d’agir personnellement pour lutter contre le changement climatique et environnemental si d’autres personnes en (NOTRE PAYS) n’agissent pas non plus	QA3.2. To what extent do you agree or disagree with the following statements about the green transition and the fight against climate change? :-You do not need to take action personally to fight climate change if other people in (OUR COUNTRY) take no action either
QA3_3	QA3.3. Dans quelle mesure êtes-vous d’accord ou pas d’accord avec les affirmations suivantes concernant la transition écologique et la lutte contre le changement climatique ? :-(NOTRE PAYS) n’a pas besoin d’agir pour lutter contre le changement climatique et environnemental si les autres pays n’agissent pas non plus	QA3.3. To what extent do you agree or disagree with the following statements about the green transition and the fight against climate change? :-(OUR COUNTRY) does not need to take action to fight climate and environmental changes if other countries take no action either.
QA4	QA4. En pensant à la raison principale pour laquelle vous réduiriez votre consommation d’énergie, quelle affirmation parmi les suivantes correspond le mieux à votre situation ? Vous réduiriez votre consommation d’énergie :	QA4. Thinking about the main reason why you would reduce your energy use, which one corresponds best to your own situation? You would reduce your energy use:
QA5_1	QA5.1. Dans quelle mesure êtes-vous confiant(e) concernant ces affirmations relatives à la réduction de la consommation énergétique ? Veuillez utiliser une échelle de 1 à 10, où 1 signifie que vous n’êtes « pas du tout confiant(e) » et 10 que vous êtes « tout à fait confiant(e) ». Les notes intermédiaires indiquent une position entre les deux. :-Globalement, dans quelle mesure êtes-vous confiant(…	QA5.1. How confident or not are you about these statements regarding the reduction of energy use? Please use a scale from 1 to 10, where 1 means ‘not at all confident’, and 10 means ‘completely confident’. The remaining numbers indicate something in between these two positions. :-Overall, how confident are you personally that you could use less energy than you do now?
QA5_2	QA5.2. Dans quelle mesure êtes-vous confiant(e) concernant ces affirmations relatives à la réduction de la consommation énergétique ? Veuillez utiliser une échelle de 1 à 10, où 1 signifie que vous n’êtes « pas du tout confiant(e) » et 10 que vous êtes « tout à fait confiant(e) ». Les notes intermédiaires indiquent une position entre les deux. :-Globalement, dans quelle mesure êtes-vous confiant(…	QA5.2. How confident or not are you about these statements regarding the reduction of energy use? Please use a scale from 1 to 10, where 1 means ‘not at all confident’, and 10 means ‘completely confident’. The remaining numbers indicate something in between these two positions. :-Overall, how confident are you that a large number of people in (OUR COUNTRY) are ready to limit their energy use in o…
QA6	QA6. Nous allons maintenant parler de votre consommation d’énergie. Quel est votre niveau de consommation d’énergie par rapport à celle des autres personnes en (NOTRE PAYS) ? Veuillez utiliser une échelle de 1 à 10, où 1 signifie que votre consommation d’énergie est « parmi les plus basses par rapport à celle des autres personnes en (NOTRE PAYS) » et 10 que votre consommation d’énergie est « parm…	QA6. Let’s now talk about your energy consumption. How does your energy consumption compare with that of other people in (OUR COUNTRY)? Please use a scale from 1 to 10, where 1 means ‘among the lowest compared with other people in (OUR COUNTRY)’, and 10 means ‘among the highest compared with other people in (OUR COUNTRY)’. The remaining numbers indicate something in between these two positions.
QA7	QA7. Quel groupe de la population parmi les suivants en (NOTRE PAYS) devrait selon vous faire particulièrement plus d'efforts pour réduire leur consommation d'énergie ?	QA7. Which of the following groups of the population in (OUR COUNTRY) do you believe should particularly make more efforts to reduce their energy consumption?
QA8_1	QA8.1. Pour chacune des affirmations suivantes, veuillez dire si elle s’applique à votre cas. :-Au cours des cinq dernières années, vous avez pris une ou plusieurs mesures pour rendre votre logement plus économe en énergie (par ex. isolation thermique, changement des portes et fenêtres ou système de chauffage)	QA8.1. For each of the following statements, please tell if it applies to you. :-In the last 5 years, you have taken one or more measures to make your home more energy efficient (e.g. thermal insulation, changing doors and windows or the heating system)
QA8_2	QA8.2. Pour chacune des affirmations suivantes, veuillez dire si elle s’applique à votre cas. :-Vous avez obtenu des financements, des subventions ou des aides publiques pour vous aider à rendre votre logement plus durable ou plus économe en énergie	QA8.2. For each of the following statements, please tell if it applies to you. :-In the last 5 years, you have received public funds, subsidies or financial help to make your house more sustainable or energy efficient
QA8_3	QA8.3. Pour chacune des affirmations suivantes, veuillez dire si elle s’applique à votre cas. :-Vous pensez que votre logement a besoin d’une rénovation énergétique	QA8.3. For each of the following statements, please tell if it applies to you. :-You believe your home needs an energy efficiency renovation
QA9A	QA9A. Que vous ayez vous-même pris des mesures ou non, quels sont les principaux obstacles pour rendre votre logement plus économe en énergie ? En premier ?	QA9A. Regardless of whether or not you have taken any measures, what are the main obstacles to making your home more energy efficient? Firstly?
QA9B	QA9B. Et deuxièmement ?	QA9B. And secondly?
QA9T	QA9T. Que vous ayez vous-même pris des mesures ou non, quels sont les principaux obstacles pour rendre votre logement plus économe en énergie ? En premier ? Et deuxièmement?	QA9T. Regardless of whether or not you have taken any measures, what are the main obstacles to making your home more energy efficient? Firstly? And secondly?
QA10_1	QA10.1. Dans quelle mesure êtes-vous d’accord ou pas d’accord avec les affirmations suivantes concernant le rôle que peuvent jouer le travail et les emplois dans la transition écologique ? :-Votre emploi contribue au progrès de la transition écologique	QA10.1. To what extent do you agree or disagree with the following statements about the role of work and jobs in the green transition? :-Your job is contributing to advancing the green transition
QA10_2	QA10.2. Dans quelle mesure êtes-vous d’accord ou pas d’accord avec les affirmations suivantes concernant le rôle que peuvent jouer le travail et les emplois dans la transition écologique ? :-Occuper un emploi qui contribue au progrès de la transition écologique est important pour vous personnellement	QA10.2. To what extent do you agree or disagree with the following statements about the role of work and jobs in the green transition? :-Being in a job that contributes to advancing the green transition is important to you personally
QA10_3	QA10.3. Dans quelle mesure êtes-vous d’accord ou pas d’accord avec les affirmations suivantes concernant le rôle que peuvent jouer le travail et les emplois dans la transition écologique ? :-Les politiques de lutte contre le changement climatique créeront plus de nouveaux emplois qu’elles n’en supprimeront	QA10.3. To what extent do you agree or disagree with the following statements about the role of work and jobs in the green transition? :-Policies to fight climate change will create more new jobs than they will remove
QA10_4	QA10.4. Dans quelle mesure êtes-vous d’accord ou pas d’accord avec les affirmations suivantes concernant le rôle que peuvent jouer le travail et les emplois dans la transition écologique ? :-Les politiques de lutte contre le changement climatique créeront des emplois de qualité (en termes de rémunération, de sécurité de l’emploi et de qualité de l’environnement de travail)	QA10.4. To what extent do you agree or disagree with the following statements about the role of work and jobs in the green transition? :-Policies to tackle climate change will create good quality jobs (in terms of earnings, job security and quality of the working environment)
QA10_5	QA10.5. Dans quelle mesure êtes-vous d’accord ou pas d’accord avec les affirmations suivantes concernant le rôle que peuvent jouer le travail et les emplois dans la transition écologique ? :-Vos compétences actuelles vous permettent de contribuer à la transition écologique	QA10.5. To what extent do you agree or disagree with the following statements about the role of work and jobs in the green transition? :-Your current skills allow you to contribute to the green transition
QA11	QA11. Au cours d’une journée type, quel est votre principal mode de transport ? Par mode principal, nous parlons de celui que vous utilisez le plus souvent.	QA11. On a typical day, what is your main mode of transport? By main mode, we mean the one that you use most often.
QA12_1	QA12.1. Comment évalueriez-vous la qualité des transports publics là où vous vivez ? :-En termes de disponibilité, c’est-à-dire que les services de transport public sont suffisants pour vous permettre de vous rendre là où vous avez besoin d’aller, en termes de quantité et de type de transport.	QA12.1. How would you rate the quality of public transport in the area where you live? :-In terms of availability: availability refers to the existence of sufficient public transport services to enable you to reach the places you need to go to, in terms of quantity and type.
QA12_2	QA12.2. Comment évalueriez-vous la qualité des transports publics là où vous vivez ? :-En termes de coût, c’est-à-dire les coûts (financiers) de transport et les efforts nécessaires pour vous rendre quelque part, l’argent et le temps nécessaires à vos déplacements.	QA12.2. How would you rate the quality of public transport in the area where you live? :-In terms of affordability, that is the money and time required to travel by public transport from one place to another.
QA12_3	QA12.3. Comment évalueriez-vous la qualité des transports publics là où vous vivez ? :-En termes de qualité, c’est-à-dire la ponctualité, la propreté, la sécurité et le confort.	QA12.3. How would you rate the quality of public transport in the area where you live? :In terms of quality: quality means punctuality, cleanliness, safety, ease of access and comfort.
QA13	QA13. Parmi la liste suivante, quels aspects vous aideraient le plus à adopter un mode de transport plus durable ? (3 RÉPONSES MAX.)	QA13. From the following list, which aspects would help you the most to adopt a more sustainable transport mode? (MAX. 3 ANSWERS)
QA14	QA14. Quel est le temps de trajet à pied entre chez vous et l’espace vert le plus proche ?	QA14. How long does it take to walk from your home to the nearest green space?
QA15	QA15. En prenant tous les aspects en compte, dans quelle mesure êtes-vous satisfait(e) ou insatisfait(e) de la qualité de l’espace vert le plus proche de chez vous ? La « qualité » inclut la façon dont cet espace répond à plusieurs besoins, s’il est sûr, attrayant, propre et la qualité des installations s’il y en a.	QA15. Taking all aspects into account, how satisfied or dissatisfied are you with the quality of the nearest green space to your home? 'Quality' might include how well it meets their needs, whether it is safe, attractive, free of litter or other mess, and the quality of the facilities if there are any.
QA16_1	QA16.1. Dans quelle mesure êtes-vous favorable ou opposé(e) aux politiques suivantes en (NOTRE PAYS) pour endiguer le changement climatique de façon inclusive et juste sans laisser personne de côté ? :-Augmenter l’investissement de (NOTRE PAYS) dans les infrastructures de transport public (par ex. les trains, les bus)	QA16.1. To what extent are you for or against the following policies in [OUR COUNTRY] to limit climate change in a way that it is inclusive and fair and leaves no one behind? :-Increasing [OUR COUNTRY]’s investments in public transport infrastructure (e.g. trains, buses)
QA16_2	QA16.2. Dans quelle mesure êtes-vous favorable ou opposé(e) aux politiques suivantes en (NOTRE PAYS) pour endiguer le changement climatique de façon inclusive et juste sans laisser personne de côté ? :-Taxer les produits et services qui contribuent le plus au changement climatique et redistribuer les recettes aux foyers les plus pauvres et vulnérables	QA16.2. To what extent are you for or against the following policies in [OUR COUNTRY] to limit climate change in a way that it is inclusive and fair and leaves no one behind? :-Taxing products and services that contribute most to climate change, and redistributing revenues to the poorest and most vulnerable households
QA16_3	QA16.3. Dans quelle mesure êtes-vous favorable ou opposé(e) aux politiques suivantes en (NOTRE PAYS) pour endiguer le changement climatique de façon inclusive et juste sans laisser personne de côté ? :-Allouer un quota énergétique à chaque citoyen pour garantir que chacun apporte sa juste contribution à la lutte contre le changement climatique	QA16.3. To what extent are you for or against the following policies in [OUR COUNTRY] to limit climate change in a way that it is inclusive and fair and leaves no one behind? :-Allocating a quota of energy to each citizen to ensure everyone makes their fair share of effort to tackle climate change
QA16_4	QA16.4. Dans quelle mesure êtes-vous favorable ou opposé(e) aux politiques suivantes en (NOTRE PAYS) pour endiguer le changement climatique de façon inclusive et juste sans laisser personne de côté ? :-Accorder des aides aux particuliers pour rendre les logements plus économes en énergie, en particulier pour les foyers les plus pauvres et vulnérables (isolation, système propre de chaleur et de fr…	QA16.4. To what extent are you for or against the following policies in [OUR COUNTRY] to limit climate change in a way that it is inclusive and fair and leaves no one behind? :-Subsidising people to help make their homes more energy efficient, especially poorer people and the most vulnerable households (insulation, clean heating and cooling, energy production units, etc.)
QA16_5	QA16.5. Dans quelle mesure êtes-vous favorable ou opposé(e) aux politiques suivantes en (NOTRE PAYS) pour endiguer le changement climatique de façon inclusive et juste sans laisser personne de côté ? :-Encourager les entreprises privées, au moyen de règles et d’incitations, à (1) réduire plus rapidement leurs émissions, (2) passer à des méthodes de production plus économes en énergie, (3) adopter…	QA16.5. To what extent are you for or against the following policies in [OUR COUNTRY] to limit climate change in a way that it is inclusive and fair and leaves no one behind? :-Encouraging private companies, through rules and incentives, to (1) reduce their emissions faster, (2) switch to more energy-efficient production methods, (3) adopt more circular and sustainable processes and (4) retrain t…
QA17_1	QA17.1. Selon vous, quelle est la gravité de chacun des problèmes suivants ? :-Le niveau des prix de l’énergie pour les particuliers en (NOTRE PAYS) en général	QA17.1. In your opinion, how serious a problem is each of the following aspects? :-The level of energy prices for people in (OUR COUNTRY) in general
QA17_2	QA17.2. Selon vous, quelle est la gravité de chacun des problèmes suivants ? :-Le coût actuel des besoins en énergie de votre foyer (éclairage, cuisine, chauffage, refroidissement, appareils électroménagers en fonctionnement, etc.)	QA17.2. In your opinion, how serious a problem is each of the following aspects? :-The current cost of your household’s energy needs (lighting, cooking, heating, cooling, running appliances, etc.)
QA17_3	QA17.3. Selon vous, quelle est la gravité de chacun des problèmes suivants ? :-Le coût actuel de vos besoins en transport (transport public, prix du ticket, automobile privée, besoins quotidiens ou moins fréquents en termes de mobilité, etc.)	QA17.3. In your opinion, how serious a problem is each of the following aspects? :-The current cost of fuel for your transport needs (public transport, ticket price increase, private cars, your daily or less frequent mobility needs etc.)
QA18	QA18. Seriez-vous prêt(e) à payer plus cher le prix de l’énergie pour accélérer la transition écologique ?	QA18. Would you be willing to pay higher energy prices if that helps to speed up the green transition?
SD05	SD05. Quelle est votre situation professionnelle ?	SD05. What employment status do you have?
D15a	D15a. Quelle est votre profession actuelle ?	D15a. What is your current occupation?
D15a_2	D15a.2. Catégorie socioprofessionnelle	D15a.2. Socio-professional category
C14	C14. Catégorie socioprofessionnelle	C14. Socio-professional category
D15b	D15b. Exerciez-vous une activité professionnelle rémunérée auparavant ? Laquelle en dernier lieu ?	D15b. Did you do any paid work in the past? What was your last occupation?
D15b_2	D15b.2. Catégorie socioprofessionnelle précédente	D15b.2. Previous socio-professional category
SD34	SD34. Parmi les partis politiques suivants, quel est celui dont vous vous sentez le plus proche ou le moins éloigné ?	SD34. To which of the following political parties do you feel the closest to or the least furthest from?
SD13	SD13. Possédez-vous une voiture ?	SD13. Do you have a car?
SD14	SD14. Quelle est/était la profession de votre père ?	SD14. What is/was the occupation of your father?
SD15	SD15. Quelle est/était la profession de votre mère ?	SD15. What is/was the occupation of your mother?
SD16	SD16. Quelle est votre situation en matière de logement ?	SD16. Which of the following applies to the place where you live?
SD17	SD17. Revenu - quintile	SD17. Total disposable income - quintile
SD18	SD18. Quel(s) langue(s) de l’UE parlez-vous suffisamment bien pour tenir une conversation ? (VEUILLEZ INDIQUER TOUTES LES LANGUES QUE VOUS PARLEZ DANS CETTE LISTE - PLUSIEURS RÉPONSES POSSIBLES)	SD18. Which EU language or languages do you speak well enough in order to be able to have a conversation? (PLEASE SPECIFY ALL THE LANGUAGES YOU SPEAK IN THIS LIST – MULTIPLE ANSWERS POSSIBLE)
SD19	SD19. Hormi le pays où vous vivez, quel(s) autre(s) pays de l’UE avez-vous déjà visité(s) ? (VEUILLEZ INDIQUER TOUS LES PAYS QUE VOUS AVEZ VISITÉS DANS CETTE LISTE - PLUSIEURS RÉPONSES POSSIBLES)	SD19. Apart from the country where you live, which other EU countries have you already visited? (PLEASE SPECIFY ALL THE COUNTRIES YOU VISITED IN THIS LIST - MULTIPLE ANSWERS POSSIBLE)
SD20	SD20. Avec qui viviez-vous la majeure partie du temps au cours d’une semaine habituelle lorsque vous aviez huit ans ? (PLUSIEURS RÉPONSES POSSIBLES)	SD20. With whom did you live most of the time in a usual week when you were 8 years old? (MULTIPLE ANSWERS POSSIBLE)
D25	D25. Quelle proposition parmi les suivantes décrit le mieux où vous vivez ?	D25. Which of the following best describes the area where you live?
D11	D11. Quel est votre âge ?	D11. How old are you?
D11R	D11R. Quel est votre âge ?	D11R. How old are you?
D7	D7. Laquelle des propositions suivantes correspond le mieux à votre situation actuelle ?	D7. Which of the following best corresponds to your own current situation?
D7R	D7R. Situation familiale	D7R. Marital status
D8	D8. À quel âge avez-vous arrêté vos études à temps complet ?	D8. How old were you when you stopped full-time education?
D8R	D8R. A quel âge avez-vous arrêté vos études à temps complet ?	D8R. How old were you when you stopped full-time education?
D8c	D8c. Quel est le niveau d'études le plus élevé que vous avez atteint ?	D8c. What is the highest level of education you completed?
D8c_LEVEL	D8c.LEVEL. Niveau d'études	D8c.LEVEL. Education level
D10	D10. Sexe	D10. Gender
D40a	D40a. Combien de personnes âgées de 15 ans et plus vivent dans votre foyer, y compris vous-même ?	D40a. How many people aged 15 years or more live in your household, yourself included?
D40b	D40b. Combien d'enfants de moins de 10 ans vivent dans votre foyer ?	D40b. How many children less than 10 years old live in your household?
D40c	D40c. Combien d'enfants de 10 à 14 ans vivent dans votre foyer ?	D40c. How many children aged 10 to 14 years old live in your household?
D40	D40. Composition du ménage	D40. Household composition
D40R	D40R. Compostion des ménages d'une personne	D40R. One-person households composition
D60	D60. Sur ces douze derniers mois, diriez-vous que vous avez eu des difficultés à payer toutes vos factures à la fin du mois ... ?	D60. During the last twelve months, would you say you had difficulties to pay your bills at the end of the month...?
D62_1	D62.1. Pouvez-vous dire si… ?:-Vous utilisez Internet chez vous, à votre domicile	D62.1. Could you tell if?:-You use the Internet at home, in your home
D62_2	D62.2. Pouvez-vous dire si… ?:-Vous utilisez Internet sur votre lieu de travail	D62.2. Could you tell if?:-You use the Internet on your place of work
D62_3	D62.3. Pouvez-vous dire si… ?:-Vous utilisez Internet sur votre appareil mobile (ordinateur portable, smartphone, tablette, etc.)	D62.3. Could you tell if?:-You use the Internet on your mobile device (laptop, smartphone, tablet, etc.)
D62_4	D62.4. Pouvez-vous indiquer si?:-Vous utilisez Internet ailleurs (école, université, cyber-cafés, etc.)	D62.4. Could you tell if?:-You use the Internet somewhere else (school, university, cyber-café, etc.)
D62R	D62R. Utilisation Internet	D62R. Use of the Internet
D78	D78. En général, l'Union européenne évoque-t-elle pour vous une image très positive, assez positive, neutre, assez négative ou très négative ?	D78. In general, does the EU conjure up for you a very positive, fairly positive, neutral, fairly negative or very negative image?

## Sheet: B
								Eurobarometer - 97.4
		VOL A weighted					Terrain/Fieldwork : 30/05 - 28/06/2022
	B. Pays de terrain						B. Fieldwork country
	Base: Ensemble						Base: All Respondents
<<Back to content		UE27 EU27	BE	BG	CZ	DK	D-W	DE	D-E	EE	IE	EL	ES	FR	HR	IT	CY	LV	LT	LU	HU	MT	NL	AT	PL	PT	RO	SI	SK	FI	SE
	Total	26395	1004	1027	1002	1004	1222	1520	298	1001	1022	1015	1005	1001	1001	1028	504	1000	1000	505	1031	503	1039	1011	1014	1000	1056	1009	1004	1044	1045
	AL	0	0	0	0	0	0	0	0	0	0	0	0	0	0	0	0	0	0	0	0	0	0	0	0	0	0	0	0	0	0
	AL	-	-	-	-	-	-	-	-	-	-	-	-	-	-	-	-	-	-	-	-	-	-	-	-	-	-	-	-	-	-
	AT	527	0	0	0	0	0	0	0	0	0	0	0	0	0	0	0	0	0	0	0	0	0	1011	0	0	0	0	0	0	0
	AT	0.02	-	-	-	-	-	-	-	-	-	-	-	-	-	-	-	-	-	-	-	-	-	1	-	-	-	-	-	-	-
	BE	667	1004	0	0	0	0	0	0	0	0	0	0	0	0	0	0	0	0	0	0	0	0	0	0	0	0	0	0	0	0
	BE	0.03	1	-	-	-	-	-	-	-	-	-	-	-	-	-	-	-	-	-	-	-	-	-	-	-	-	-	-	-	-
	BG	410	0	1027	0	0	0	0	0	0	0	0	0	0	0	0	0	0	0	0	0	0	0	0	0	0	0	0	0	0	0
	BG	0.02	-	1	-	-	-	-	-	-	-	-	-	-	-	-	-	-	-	-	-	-	-	-	-	-	-	-	-	-	-
	BA	0	0	0	0	0	0	0	0	0	0	0	0	0	0	0	0	0	0	0	0	0	0	0	0	0	0	0	0	0	0
	BA	-	-	-	-	-	-	-	-	-	-	-	-	-	-	-	-	-	-	-	-	-	-	-	-	-	-	-	-	-	-
	CH	0	0	0	0	0	0	0	0	0	0	0	0	0	0	0	0	0	0	0	0	0	0	0	0	0	0	0	0	0	0
	CH	-	-	-	-	-	-	-	-	-	-	-	-	-	-	-	-	-	-	-	-	-	-	-	-	-	-	-	-	-	-
	CY	51	0	0	0	0	0	0	0	0	0	0	0	0	0	0	504	0	0	0	0	0	0	0	0	0	0	0	0	0	0
	CY	-	-	-	-	-	-	-	-	-	-	-	-	-	-	-	1	-	-	-	-	-	-	-	-	-	-	-	-	-	-
	CY(TCC)	0	0	0	0	0	0	0	0	0	0	0	0	0	0	0	0	0	0	0	0	0	0	0	0	0	0	0	0	0	0
	CY(TCC)	-	-	-	-	-	-	-	-	-	-	-	-	-	-	-	-	-	-	-	-	-	-	-	-	-	-	-	-	-	-
	CZ	618	0	0	1002	0	0	0	0	0	0	0	0	0	0	0	0	0	0	0	0	0	0	0	0	0	0	0	0	0	0
	CZ	0.02	-	-	1	-	-	-	-	-	-	-	-	-	-	-	-	-	-	-	-	-	-	-	-	-	-	-	-	-	-
	DE	0	0	0	0	0	0	0	0	0	0	0	0	0	0	0	0	0	0	0	0	0	0	0	0	0	0	0	0	0	0
	DE	-	-	-	-	-	-	-	-	-	-	-	-	-	-	-	-	-	-	-	-	-	-	-	-	-	-	-	-	-	-
	DK	336	0	0	0	1004	0	0	0	0	0	0	0	0	0	0	0	0	0	0	0	0	0	0	0	0	0	0	0	0	0
	DK	0.01	-	-	-	1	-	-	-	-	-	-	-	-	-	-	-	-	-	-	-	-	-	-	-	-	-	-	-	-	-
	EE	77	0	0	0	0	0	0	0	1001	0	0	0	0	0	0	0	0	0	0	0	0	0	0	0	0	0	0	0	0	0
	EE	-	-	-	-	-	-	-	-	1	-	-	-	-	-	-	-	-	-	-	-	-	-	-	-	-	-	-	-	-	-
	EL(GR)	643	0	0	0	0	0	0	0	0	0	1015	0	0	0	0	0	0	0	0	0	0	0	0	0	0	0	0	0	0	0
	EL(GR)	0.03	-	-	-	-	-	-	-	-	-	1	-	-	-	-	-	-	-	-	-	-	-	-	-	-	-	-	-	-	-
	ES	2825	0	0	0	0	0	0	0	0	0	0	1005	0	0	0	0	0	0	0	0	0	0	0	0	0	0	0	0	0	0
	ES	0.11	-	-	-	-	-	-	-	-	-	-	1	-	-	-	-	-	-	-	-	-	-	-	-	-	-	-	-	-	-
	FI	323	0	0	0	0	0	0	0	0	0	0	0	0	0	0	0	0	0	0	0	0	0	0	0	0	0	0	0	1044	0
	FI	0.01	-	-	-	-	-	-	-	-	-	-	-	-	-	-	-	-	-	-	-	-	-	-	-	-	-	-	-	1	-
	FR	3870	0	0	0	0	0	0	0	0	0	0	0	1001	0	0	0	0	0	0	0	0	0	0	0	0	0	0	0	0	0
	FR	0.15	-	-	-	-	-	-	-	-	-	-	-	1	-	-	-	-	-	-	-	-	-	-	-	-	-	-	-	-	-
	HR	240	0	0	0	0	0	0	0	0	0	0	0	0	1001	0	0	0	0	0	0	0	0	0	0	0	0	0	0	0	0
	HR	0.01	-	-	-	-	-	-	-	-	-	-	-	-	1	-	-	-	-	-	-	-	-	-	-	-	-	-	-	-	-
	HU	575	0	0	0	0	0	0	0	0	0	0	0	0	0	0	0	0	0	0	1031	0	0	0	0	0	0	0	0	0	0
	HU	0.02	-	-	-	-	-	-	-	-	-	-	-	-	-	-	-	-	-	-	1	-	-	-	-	-	-	-	-	-	-
	IE	272	0	0	0	0	0	0	0	0	1022	0	0	0	0	0	0	0	0	0	0	0	0	0	0	0	0	0	0	0	0
	IE	0.01	-	-	-	-	-	-	-	-	1	-	-	-	-	-	-	-	-	-	-	-	-	-	-	-	-	-	-	-	-
	IS	0	0	0	0	0	0	0	0	0	0	0	0	0	0	0	0	0	0	0	0	0	0	0	0	0	0	0	0	0	0
	IS	-	-	-	-	-	-	-	-	-	-	-	-	-	-	-	-	-	-	-	-	-	-	-	-	-	-	-	-	-	-
	IT	3638	0	0	0	0	0	0	0	0	0	0	0	0	0	1028	0	0	0	0	0	0	0	0	0	0	0	0	0	0	0
	IT	0.14	-	-	-	-	-	-	-	-	-	-	-	-	-	1	-	-	-	-	-	-	-	-	-	-	-	-	-	-	-
	KV	0	0	0	0	0	0	0	0	0	0	0	0	0	0	0	0	0	0	0	0	0	0	0	0	0	0	0	0	0	0
	KV	-	-	-	-	-	-	-	-	-	-	-	-	-	-	-	-	-	-	-	-	-	-	-	-	-	-	-	-	-	-
	LT	164	0	0	0	0	0	0	0	0	0	0	0	0	0	0	0	0	1000	0	0	0	0	0	0	0	0	0	0	0	0
	LT	0.01	-	-	-	-	-	-	-	-	-	-	-	-	-	-	-	-	1	-	-	-	-	-	-	-	-	-	-	-	-
	LU	36	0	0	0	0	0	0	0	0	0	0	0	0	0	0	0	0	0	505	0	0	0	0	0	0	0	0	0	0	0
	LU	-	-	-	-	-	-	-	-	-	-	-	-	-	-	-	-	-	-	1	-	-	-	-	-	-	-	-	-	-	-
	LV	111	0	0	0	0	0	0	0	0	0	0	0	0	0	0	0	1000	0	0	0	0	0	0	0	0	0	0	0	0	0
	LV	-	-	-	-	-	-	-	-	-	-	-	-	-	-	-	-	1	-	-	-	-	-	-	-	-	-	-	-	-	-
	ME	0	0	0	0	0	0	0	0	0	0	0	0	0	0	0	0	0	0	0	0	0	0	0	0	0	0	0	0	0	0
	ME	-	-	-	-	-	-	-	-	-	-	-	-	-	-	-	-	-	-	-	-	-	-	-	-	-	-	-	-	-	-
	MK	0	0	0	0	0	0	0	0	0	0	0	0	0	0	0	0	0	0	0	0	0	0	0	0	0	0	0	0	0	0
	MK	-	-	-	-	-	-	-	-	-	-	-	-	-	-	-	-	-	-	-	-	-	-	-	-	-	-	-	-	-	-
	MT	31	0	0	0	0	0	0	0	0	0	0	0	0	0	0	0	0	0	0	0	503	0	0	0	0	0	0	0	0	0
	MT	-	-	-	-	-	-	-	-	-	-	-	-	-	-	-	-	-	-	-	-	1	-	-	-	-	-	-	-	-	-
	NL	1013	0	0	0	0	0	0	0	0	0	0	0	0	0	0	0	0	0	0	0	0	1039	0	0	0	0	0	0	0	0
	NL	0.04	-	-	-	-	-	-	-	-	-	-	-	-	-	-	-	-	-	-	-	-	1	-	-	-	-	-	-	-	-
	NO	0	0	0	0	0	0	0	0	0	0	0	0	0	0	0	0	0	0	0	0	0	0	0	0	0	0	0	0	0	0
	NO	-	-	-	-	-	-	-	-	-	-	-	-	-	-	-	-	-	-	-	-	-	-	-	-	-	-	-	-	-	-
	PL	2212	0	0	0	0	0	0	0	0	0	0	0	0	0	0	0	0	0	0	0	0	0	0	1014	0	0	0	0	0	0
	PL	0.08	-	-	-	-	-	-	-	-	-	-	-	-	-	-	-	-	-	-	-	-	-	-	1	-	-	-	-	-	-
	PT	620	0	0	0	0	0	0	0	0	0	0	0	0	0	0	0	0	0	0	0	0	0	0	0	1000	0	0	0	0	0
	PT	0.02	-	-	-	-	-	-	-	-	-	-	-	-	-	-	-	-	-	-	-	-	-	-	-	1	-	-	-	-	-
	RO	1123	0	0	0	0	0	0	0	0	0	0	0	0	0	0	0	0	0	0	0	0	0	0	0	0	1056	0	0	0	0
	RO	0.04	-	-	-	-	-	-	-	-	-	-	-	-	-	-	-	-	-	-	-	-	-	-	-	-	1	-	-	-	-
	RS	0	0	0	0	0	0	0	0	0	0	0	0	0	0	0	0	0	0	0	0	0	0	0	0	0	0	0	0	0	0
	RS	-	-	-	-	-	-	-	-	-	-	-	-	-	-	-	-	-	-	-	-	-	-	-	-	-	-	-	-	-	-
	SE	589	0	0	0	0	0	0	0	0	0	0	0	0	0	0	0	0	0	0	0	0	0	0	0	0	0	0	0	0	1045
	SE	0.02	-	-	-	-	-	-	-	-	-	-	-	-	-	-	-	-	-	-	-	-	-	-	-	-	-	-	-	-	1
	SI	123	0	0	0	0	0	0	0	0	0	0	0	0	0	0	0	0	0	0	0	0	0	0	0	0	0	1009	0	0	0
	SI	0.01	-	-	-	-	-	-	-	-	-	-	-	-	-	-	-	-	-	-	-	-	-	-	-	-	-	1	-	-	-
	SK	315	0	0	0	0	0	0	0	0	0	0	0	0	0	0	0	0	0	0	0	0	0	0	0	0	0	0	1004	0	0
	SK	0.01	-	-	-	-	-	-	-	-	-	-	-	-	-	-	-	-	-	-	-	-	-	-	-	-	-	-	1	-	-
	TR	0	0	0	0	0	0	0	0	0	0	0	0	0	0	0	0	0	0	0	0	0	0	0	0	0	0	0	0	0	0
	TR	-	-	-	-	-	-	-	-	-	-	-	-	-	-	-	-	-	-	-	-	-	-	-	-	-	-	-	-	-	-
	UK	0	0	0	0	0	0	0	0	0	0	0	0	0	0	0	0	0	0	0	0	0	0	0	0	0	0	0	0	0	0
	UK	-	-	-	-	-	-	-	-	-	-	-	-	-	-	-	-	-	-	-	-	-	-	-	-	-	-	-	-	-	-
	US	0	0	0	0	0	0	0	0	0	0	0	0	0	0	0	0	0	0	0	0	0	0	0	0	0	0	0	0	0	0
	US	-	-	-	-	-	-	-	-	-	-	-	-	-	-	-	-	-	-	-	-	-	-	-	-	-	-	-	-	-	-
	WG	4008	0	0	0	0	1222	1222	0	0	0	0	0	0	0	0	0	0	0	0	0	0	0	0	0	0	0	0	0	0	0
	WG	0.15	-	-	-	-	1	0.8	-	-	-	-	-	-	-	-	-	-	-	-	-	-	-	-	-	-	-	-	-	-	-
	EG	978	0	0	0	0	0	298	298	0	0	0	0	0	0	0	0	0	0	0	0	0	0	0	0	0	0	0	0	0	0
	EG	0.04	-	-	-	-	-	0.2	1	-	-	-	-	-	-	-	-	-	-	-	-	-	-	-	-	-	-	-	-	-	-

## Sheet: QA1_1
								Eurobarometer - 97.4
		VOL A weighted					Terrain/Fieldwork : 30/05 - 28/06/2022
	QA1.1. Dans quelle mesure êtes-vous d’accord ou pas d’accord avec les affirmations suivantes ?						QA1.1. To what extent do you agree or disagree with the following statements?
	Vous ressentez personnellement la responsabilité d’essayer de réduire le changement climatique						You feel a personal responsibility to act to limit climate change
	Base: Ensemble						Base: All Respondents
<<Back to content		UE27 EU27	BE	BG	CZ	DK	D-W	DE	D-E	EE	IE	EL	ES	FR	HR	IT	CY	LV	LT	LU	HU	MT	NL	AT	PL	PT	RO	SI	SK	FI	SE
	Total	26395	1004	1027	1002	1004	1222	1520	298	1001	1022	1015	1005	1001	1001	1028	504	1000	1000	505	1031	503	1039	1011	1014	1000	1056	1009	1004	1044	1045
	Tout à fait d'accord	7944	309	161	132	406	459	530	71	142	310	180	349	337	217	286	261	197	241	175	303	240	430	278	193	284	233	421	220	334	436
	Totally agree	0.3	0.31	0.16	0.13	0.41	0.37	0.35	0.24	0.14	0.3	0.18	0.35	0.34	0.22	0.28	0.52	0.2	0.24	0.35	0.29	0.48	0.41	0.27	0.19	0.28	0.22	0.42	0.22	0.32	0.42
	Plutôt d'accord	12465	541	412	397	458	559	701	143	398	521	563	445	472	497	507	181	465	507	283	527	239	470	476	504	588	431	386	462	501	479
	Tend to agree	0.47	0.54	0.4	0.4	0.46	0.46	0.46	0.48	0.4	0.51	0.55	0.44	0.47	0.49	0.49	0.36	0.46	0.51	0.56	0.51	0.47	0.45	0.47	0.5	0.59	0.41	0.38	0.46	0.48	0.46
	Plutôt pas d'accord	4140	119	222	299	94	143	197	54	260	123	225	136	131	227	175	46	206	174	36	155	15	104	172	226	83	265	144	222	136	96
	Tend to disagree	0.16	0.12	0.22	0.3	0.09	0.12	0.13	0.18	0.26	0.12	0.22	0.14	0.13	0.23	0.17	0.09	0.21	0.17	0.07	0.15	0.03	0.1	0.17	0.22	0.08	0.25	0.14	0.22	0.13	0.09
	Pas du tout d'accord	1419	32	149	159	44	52	74	22	148	40	39	50	44	57	49	14	102	49	8	36	4	32	67	72	8	90	54	81	64	31
	Totally disagree	0.05	0.03	0.14	0.16	0.04	0.04	0.05	0.07	0.15	0.04	0.04	0.05	0.04	0.06	0.05	0.03	0.1	0.05	0.02	0.04	0.01	0.03	0.07	0.07	0.01	0.08	0.05	0.08	0.06	0.03
	Ne sait pas	428	3	84	15	2	9	17	8	53	28	8	24	16	4	11	2	30	28	2	9	5	4	19	20	37	37	4	19	9	3
	Don't know	0.02	-	0.08	0.01	-	0.01	0.01	0.03	0.05	0.03	0.01	0.02	0.02	-	0.01	-	0.03	0.03	-	0.01	0.01	0.01	0.02	0.02	0.04	0.04	0.01	0.02	0.01	-
	Total 'D'accord'	20409	850	572	529	864	1018	1231	213	540	831	742	795	810	714	793	443	662	748	458	830	479	900	754	696	872	664	807	682	835	915
	Total 'Agree'	0.77	0.85	0.56	0.53	0.87	0.83	0.81	0.72	0.54	0.81	0.73	0.79	0.81	0.71	0.77	0.88	0.66	0.75	0.91	0.8	0.95	0.86	0.74	0.69	0.87	0.63	0.8	0.68	0.8	0.88
	Total 'Pas d'accord'	5559	151	370	458	138	195	271	76	408	163	265	187	176	284	225	60	308	223	44	192	19	136	239	298	91	355	198	303	200	127
	Total 'Disagree'	0.21	0.15	0.36	0.46	0.13	0.16	0.18	0.25	0.41	0.16	0.26	0.19	0.17	0.29	0.22	0.12	0.31	0.22	0.09	0.19	0.04	0.13	0.24	0.29	0.09	0.33	0.19	0.3	0.19	0.12

## Sheet: QA1_2
								Eurobarometer - 97.4
		VOL A weighted					Terrain/Fieldwork : 30/05 - 28/06/2022
	QA1.2. Dans quelle mesure êtes-vous d’accord ou pas d’accord avec les affirmations suivantes ?						QA1.2. To what extent do you agree or disagree with the following statements?
	La transition écologique ne devrait laisser personne de côté						The green transition should not leave anyone behind
	Base: Ensemble						Base: All Respondents
<<Back to content		UE27 EU27	BE	BG	CZ	DK	D-W	DE	D-E	EE	IE	EL	ES	FR	HR	IT	CY	LV	LT	LU	HU	MT	NL	AT	PL	PT	RO	SI	SK	FI	SE
	Total	26395	1004	1027	1002	1004	1222	1520	298	1001	1022	1015	1005	1001	1001	1028	504	1000	1000	505	1031	503	1039	1011	1014	1000	1056	1009	1004	1044	1045
	Tout à fait d'accord	13232	547	389	377	543	670	844	173	403	464	474	557	554	483	502	359	446	405	243	546	321	632	457	359	429	302	580	491	483	683
	Totally agree	0.5	0.54	0.38	0.38	0.54	0.55	0.55	0.58	0.4	0.45	0.47	0.55	0.55	0.48	0.49	0.71	0.45	0.41	0.48	0.53	0.64	0.61	0.45	0.35	0.43	0.29	0.58	0.49	0.46	0.66
	Plutôt d'accord	10197	387	416	458	371	454	552	98	404	456	473	332	354	421	408	130	416	478	235	396	158	333	393	516	463	456	304	385	441	263
	Tend to agree	0.38	0.39	0.4	0.46	0.37	0.37	0.36	0.33	0.4	0.45	0.47	0.33	0.35	0.42	0.4	0.26	0.42	0.48	0.47	0.38	0.31	0.32	0.39	0.51	0.46	0.43	0.3	0.38	0.42	0.25
	Plutôt pas d'accord	1511	48	51	89	70	57	74	17	66	30	36	37	34	76	61	9	72	64	17	65	9	50	91	83	19	188	75	48	76	62
	Tend to disagree	0.06	0.05	0.05	0.09	0.07	0.05	0.05	0.05	0.07	0.03	0.03	0.04	0.04	0.08	0.06	0.02	0.07	0.06	0.03	0.06	0.02	0.05	0.09	0.08	0.02	0.18	0.07	0.05	0.07	0.06
	Pas du tout d'accord	493	19	37	34	18	22	27	5	38	11	2	12	21	14	16	2	36	13	2	8	6	15	28	30	1	29	31	34	18	24
	Totally disagree	0.02	0.02	0.04	0.03	0.02	0.02	0.02	0.02	0.04	0.01	-	0.01	0.02	0.01	0.01	-	0.03	0.01	-	0.01	0.01	0.01	0.03	0.03	-	0.03	0.03	0.03	0.02	0.02
	Ne sait pas	962	3	134	44	3	18	23	5	90	61	31	67	38	7	41	4	30	41	7	16	8	9	42	26	89	80	20	45	27	12
	Don't know	0.04	-	0.13	0.04	-	0.01	0.02	0.02	0.09	0.06	0.03	0.07	0.04	0.01	0.04	0.01	0.03	0.04	0.02	0.02	0.02	0.01	0.04	0.03	0.09	0.07	0.02	0.05	0.03	0.01
	Total 'D'accord'	23429	934	805	835	914	1125	1396	271	807	920	947	890	908	904	910	489	862	882	479	942	479	966	850	874	892	758	884	877	924	946
	Total 'Agree'	0.88	0.93	0.78	0.84	0.91	0.92	0.91	0.91	0.8	0.9	0.94	0.88	0.9	0.9	0.89	0.97	0.87	0.89	0.95	0.91	0.95	0.93	0.84	0.86	0.89	0.72	0.88	0.87	0.88	0.91
	Total 'Pas d'accord'	2004	67	88	123	88	79	101	22	104	41	38	48	55	90	77	11	108	77	19	73	15	65	119	114	19	217	106	82	93	87
	Total 'Disagree'	0.08	0.07	0.09	0.12	0.09	0.07	0.07	0.07	0.11	0.04	0.03	0.05	0.06	0.09	0.07	0.02	0.1	0.07	0.03	0.07	0.03	0.06	0.12	0.11	0.02	0.21	0.1	0.08	0.09	0.08

## Sheet: QA1_3
								Eurobarometer - 97.4
		VOL A weighted					Terrain/Fieldwork : 30/05 - 28/06/2022
	QA1.3. Dans quelle mesure êtes-vous d’accord ou pas d’accord avec les affirmations suivantes ?						QA1.3. To what extent do you agree or disagree with the following statements?
	Le changement climatique est quelque chose qui vous fait peur						Climate change is something that frightens you
	Base: Ensemble						Base: All Respondents
<<Back to content		UE27 EU27	BE	BG	CZ	DK	D-W	DE	D-E	EE	IE	EL	ES	FR	HR	IT	CY	LV	LT	LU	HU	MT	NL	AT	PL	PT	RO	SI	SK	FI	SE
	Total	26395	1004	1027	1002	1004	1222	1520	298	1001	1022	1015	1005	1001	1001	1028	504	1000	1000	505	1031	503	1039	1011	1014	1000	1056	1009	1004	1044	1045
	Tout à fait d'accord	7455	258	247	150	289	295	366	71	96	203	403	382	306	282	378	272	159	216	137	292	232	142	208	220	293	242	327	240	122	400
	Totally agree	0.28	0.26	0.24	0.15	0.29	0.24	0.24	0.24	0.1	0.2	0.4	0.38	0.31	0.28	0.37	0.54	0.16	0.21	0.27	0.28	0.46	0.14	0.2	0.22	0.29	0.23	0.32	0.24	0.12	0.38
	Plutôt d'accord	11065	500	414	383	394	477	590	113	303	349	407	403	404	476	466	144	390	439	262	473	210	372	374	503	599	413	431	381	386	442
	Tend to agree	0.42	0.5	0.4	0.38	0.39	0.39	0.39	0.38	0.3	0.34	0.4	0.4	0.4	0.48	0.45	0.29	0.39	0.44	0.52	0.46	0.42	0.36	0.37	0.5	0.6	0.39	0.43	0.38	0.37	0.42
	Plutôt pas d'accord	5059	174	190	325	199	300	366	66	334	311	160	128	166	166	117	55	287	247	82	213	37	314	280	211	80	277	170	258	343	120
	Tend to disagree	0.19	0.17	0.19	0.32	0.2	0.25	0.24	0.22	0.33	0.3	0.16	0.13	0.16	0.17	0.11	0.11	0.29	0.25	0.16	0.21	0.07	0.3	0.28	0.21	0.08	0.26	0.17	0.26	0.33	0.12
	Pas du tout d'accord	2495	71	127	126	121	139	185	47	238	138	39	71	117	64	57	32	149	94	23	51	20	206	139	56	13	100	81	99	190	80
	Totally disagree	0.1	0.07	0.12	0.13	0.12	0.11	0.12	0.15	0.24	0.14	0.04	0.07	0.12	0.06	0.06	0.06	0.15	0.09	0.05	0.05	0.04	0.2	0.14	0.05	0.01	0.1	0.08	0.1	0.18	0.08
	Ne sait pas	322	1	49	19	1	11	13	2	30	21	6	20	7	13	10	1	16	6	1	1	4	5	11	24	15	23	0	26	3	3
	Don't know	0.01	-	0.05	0.02	-	0.01	0.01	0.01	0.03	0.02	-	0.02	0.01	0.01	0.01	-	0.01	0.01	-	-	0.01	-	0.01	0.02	0.02	0.02	-	0.02	-	-
	Total 'D'accord'	18519	758	661	532	683	772	956	184	399	552	811	786	711	757	844	416	548	654	399	766	442	514	582	723	892	655	758	621	508	842
	Total 'Agree'	0.7	0.76	0.64	0.53	0.68	0.63	0.63	0.62	0.4	0.54	0.8	0.78	0.71	0.76	0.82	0.83	0.55	0.65	0.79	0.74	0.88	0.5	0.57	0.72	0.89	0.62	0.75	0.62	0.49	0.8
	Total 'Pas d'accord'	7554	245	316	450	319	439	551	112	572	449	199	199	283	230	174	87	436	340	104	264	57	520	418	267	93	378	251	357	533	200
	Total 'Disagree'	0.29	0.24	0.31	0.45	0.32	0.36	0.36	0.37	0.57	0.44	0.2	0.2	0.28	0.23	0.17	0.17	0.44	0.34	0.21	0.26	0.11	0.5	0.42	0.26	0.09	0.36	0.25	0.36	0.51	0.2

## Sheet: QA1_4
								Eurobarometer - 97.4
		VOL A weighted					Terrain/Fieldwork : 30/05 - 28/06/2022
	QA1.4. Dans quelle mesure êtes-vous d’accord ou pas d’accord avec les affirmations suivantes ?						QA1.4. To what extent do you agree or disagree with the following statements?
	Vous avez confiance dans le fait que, d’ici à 2050, l’énergie, les produits et les services durables seront abordables pour tous, y compris pour les plus pauvres						You are confident that by 2050 sustainable energy, products and services will be affordable for everyone, including poorer people
	Base: Ensemble						Base: All Respondents
<<Back to content		UE27 EU27	BE	BG	CZ	DK	D-W	DE	D-E	EE	IE	EL	ES	FR	HR	IT	CY	LV	LT	LU	HU	MT	NL	AT	PL	PT	RO	SI	SK	FI	SE
	Total	26395	1004	1027	1002	1004	1222	1520	298	1001	1022	1015	1005	1001	1001	1028	504	1000	1000	505	1031	503	1039	1011	1014	1000	1056	1009	1004	1044	1045
	Tout à fait d'accord	3630	115	124	44	220	122	147	25	105	148	64	129	77	162	291	80	67	88	52	159	79	122	162	163	129	197	110	129	92	79
	Totally agree	0.14	0.12	0.12	0.04	0.22	0.1	0.1	0.08	0.1	0.15	0.06	0.13	0.08	0.16	0.28	0.16	0.07	0.09	0.1	0.15	0.16	0.12	0.16	0.16	0.13	0.19	0.11	0.13	0.09	0.08
	Plutôt d'accord	8537	350	319	266	367	429	498	69	263	351	276	300	222	439	438	126	280	277	183	363	139	260	350	390	273	439	214	298	357	261
	Tend to agree	0.32	0.35	0.31	0.27	0.37	0.35	0.33	0.23	0.26	0.34	0.27	0.3	0.22	0.44	0.43	0.25	0.28	0.27	0.36	0.35	0.28	0.25	0.35	0.38	0.27	0.42	0.21	0.3	0.34	0.25
	Plutôt pas d'accord	8181	363	242	404	296	400	507	108	299	301	412	261	374	244	174	126	432	331	153	276	181	471	296	301	386	291	420	295	411	407
	Tend to disagree	0.31	0.36	0.24	0.4	0.29	0.33	0.33	0.36	0.3	0.29	0.41	0.26	0.37	0.24	0.17	0.25	0.43	0.33	0.3	0.27	0.36	0.45	0.29	0.3	0.38	0.27	0.42	0.29	0.4	0.39
	Pas du tout d'accord	4551	162	148	219	109	230	317	88	227	130	168	234	266	128	71	102	174	207	83	153	71	174	149	101	86	62	234	204	148	282
	Totally disagree	0.17	0.16	0.14	0.22	0.11	0.19	0.21	0.3	0.23	0.13	0.17	0.23	0.27	0.13	0.07	0.2	0.17	0.21	0.17	0.15	0.14	0.17	0.15	0.1	0.09	0.06	0.23	0.2	0.14	0.27
	Ne sait pas	1497	13	194	69	12	41	51	9	107	92	95	80	62	28	54	69	47	97	35	80	33	12	53	59	126	68	31	77	35	16
	Don't know	0.06	0.01	0.19	0.07	0.01	0.03	0.03	0.03	0.11	0.09	0.09	0.08	0.06	0.03	0.05	0.14	0.05	0.1	0.07	0.08	0.06	0.01	0.05	0.06	0.13	0.06	0.03	0.08	0.03	0.01
	Total 'D'accord'	12167	466	443	310	587	551	645	94	368	499	340	429	299	602	729	206	346	364	235	522	218	382	512	553	402	636	324	427	450	340
	Total 'Agree'	0.46	0.47	0.43	0.31	0.59	0.45	0.43	0.31	0.36	0.49	0.33	0.43	0.3	0.6	0.71	0.41	0.35	0.36	0.46	0.5	0.44	0.37	0.51	0.54	0.4	0.61	0.32	0.43	0.43	0.33
	Total 'Pas d'accord'	12731	525	391	623	405	629	825	195	526	431	580	496	640	371	245	228	606	539	235	430	252	645	445	402	472	352	654	500	559	689
	Total 'Disagree'	0.48	0.52	0.38	0.62	0.4	0.52	0.54	0.66	0.53	0.42	0.58	0.49	0.64	0.37	0.24	0.45	0.6	0.54	0.47	0.42	0.5	0.62	0.44	0.4	0.47	0.33	0.65	0.49	0.54	0.66

## Sheet: QA2_1
								Eurobarometer - 97.4
		VOL A weighted					Terrain/Fieldwork : 30/05 - 28/06/2022
	QA2.1. Dans quelle mesure êtes-vous d’accord ou pas d’accord avec le fait que chacun des acteurs suivants en fait assez pour s’assurer que la transition écologique est socialement juste ?						QA2.1. To what extent do you agree or disagree that each of the following actors is doing enough to ensure that the green transition is fair?
	Les entreprises et sociétés privées						Private companies, businesses
	Base: Ensemble						Base: All Respondents
<<Back to content		UE27 EU27	BE	BG	CZ	DK	D-W	DE	D-E	EE	IE	EL	ES	FR	HR	IT	CY	LV	LT	LU	HU	MT	NL	AT	PL	PT	RO	SI	SK	FI	SE
	Total	26395	1004	1027	1002	1004	1222	1520	298	1001	1022	1015	1005	1001	1001	1028	504	1000	1000	505	1031	503	1039	1011	1014	1000	1056	1009	1004	1044	1045
	Tout à fait d'accord	2880	77	72	88	129	99	121	21	77	97	40	115	90	122	191	54	66	36	65	127	157	72	93	162	56	143	147	57	98	80
	Totally agree	0.11	0.08	0.07	0.09	0.13	0.08	0.08	0.07	0.08	0.1	0.04	0.12	0.09	0.12	0.19	0.11	0.07	0.04	0.13	0.12	0.31	0.07	0.09	0.16	0.06	0.14	0.14	0.06	0.09	0.08
	Plutôt d'accord	8391	378	188	290	409	363	447	84	344	318	233	241	224	321	464	146	333	231	164	432	116	315	378	368	302	399	259	284	459	412
	Tend to agree	0.32	0.38	0.18	0.29	0.41	0.3	0.29	0.28	0.34	0.31	0.23	0.24	0.22	0.32	0.45	0.29	0.33	0.23	0.33	0.42	0.23	0.3	0.37	0.36	0.3	0.38	0.26	0.28	0.44	0.39
	Plutôt pas d'accord	9846	428	307	459	322	521	652	131	349	359	446	335	400	383	280	171	434	475	163	327	159	487	364	358	421	353	448	380	381	379
	Tend to disagree	0.37	0.43	0.3	0.46	0.32	0.42	0.43	0.44	0.35	0.35	0.44	0.33	0.4	0.38	0.27	0.34	0.43	0.48	0.32	0.32	0.32	0.47	0.36	0.35	0.42	0.33	0.44	0.38	0.37	0.36
	Pas du tout d'accord	3886	105	272	103	97	205	257	52	86	148	245	252	200	163	54	99	105	184	71	115	61	124	130	79	117	102	139	186	74	159
	Totally disagree	0.15	0.1	0.27	0.1	0.1	0.17	0.17	0.18	0.09	0.14	0.24	0.25	0.2	0.17	0.05	0.19	0.11	0.18	0.14	0.11	0.12	0.12	0.13	0.08	0.12	0.1	0.14	0.18	0.07	0.15
	Ne sait pas	1391	16	188	63	46	33	42	10	145	99	51	62	88	12	39	34	62	74	41	31	10	41	46	48	104	58	17	96	32	15
	Don't know	0.05	0.01	0.18	0.06	0.04	0.03	0.03	0.03	0.14	0.1	0.05	0.06	0.09	0.01	0.04	0.07	0.06	0.07	0.08	0.03	0.02	0.04	0.05	0.05	0.1	0.05	0.02	0.1	0.03	0.02
	Total 'D'accord'	11271	456	259	378	538	463	568	105	421	416	273	356	314	443	655	200	399	267	230	558	273	387	471	529	358	543	406	341	558	492
	Total 'Agree'	0.43	0.46	0.25	0.38	0.54	0.38	0.37	0.35	0.42	0.41	0.27	0.36	0.31	0.44	0.64	0.4	0.4	0.27	0.46	0.54	0.54	0.37	0.46	0.52	0.36	0.52	0.4	0.34	0.53	0.47
	Total 'Pas d'accord'	13733	532	579	562	419	726	910	183	435	507	691	587	599	546	334	270	539	660	235	442	220	612	494	436	538	455	586	566	454	537
	Total 'Disagree'	0.52	0.53	0.57	0.56	0.42	0.59	0.6	0.62	0.44	0.49	0.68	0.58	0.6	0.55	0.32	0.53	0.54	0.66	0.46	0.43	0.44	0.59	0.49	0.43	0.54	0.43	0.58	0.56	0.44	0.51

## Sheet: QA2_2
								Eurobarometer - 97.4
		VOL A weighted					Terrain/Fieldwork : 30/05 - 28/06/2022
	QA2.2. Dans quelle mesure êtes-vous d’accord ou pas d’accord avec le fait que chacun des acteurs suivants en fait assez pour s’assurer que la transition écologique est socialement juste ?						QA2.2. To what extent do you agree or disagree that each of the following actors is doing enough to ensure that the green transition is fair?
	Les autorités publiques locales, régionales ou municipales						Your regional, city or local public authorities
	Base: Ensemble						Base: All Respondents
<<Back to content		UE27 EU27	BE	BG	CZ	DK	D-W	DE	D-E	EE	IE	EL	ES	FR	HR	IT	CY	LV	LT	LU	HU	MT	NL	AT	PL	PT	RO	SI	SK	FI	SE
	Total	26395	1004	1027	1002	1004	1222	1520	298	1001	1022	1015	1005	1001	1001	1028	504	1000	1000	505	1031	503	1039	1011	1014	1000	1056	1009	1004	1044	1045
	Tout à fait d'accord	3612	97	91	97	145	116	140	24	92	92	61	118	111	149	238	66	74	72	79	178	143	100	158	211	97	225	157	74	138	121
	Totally agree	0.14	0.1	0.09	0.1	0.14	0.1	0.09	0.08	0.09	0.09	0.06	0.12	0.11	0.15	0.23	0.13	0.07	0.07	0.16	0.17	0.29	0.09	0.15	0.21	0.1	0.21	0.16	0.07	0.13	0.11
	Plutôt d'accord	9500	447	233	413	476	467	570	103	408	398	204	278	337	307	381	195	438	327	245	456	161	464	393	380	321	323	299	376	578	510
	Tend to agree	0.36	0.44	0.23	0.41	0.48	0.38	0.37	0.35	0.41	0.39	0.2	0.28	0.34	0.3	0.37	0.39	0.44	0.33	0.48	0.44	0.32	0.45	0.39	0.37	0.32	0.31	0.3	0.38	0.55	0.49
	Plutôt pas d'accord	8728	349	294	342	295	430	541	111	287	351	406	321	338	358	320	157	328	371	139	300	139	365	321	319	388	330	426	303	247	289
	Tend to disagree	0.33	0.35	0.28	0.34	0.29	0.35	0.36	0.37	0.28	0.34	0.4	0.32	0.34	0.36	0.31	0.31	0.33	0.37	0.28	0.29	0.28	0.35	0.32	0.31	0.39	0.31	0.42	0.3	0.24	0.28
	Pas du tout d'accord	3149	90	275	78	50	143	184	41	77	75	300	224	132	177	65	66	102	140	30	73	52	72	100	57	102	131	114	179	51	102
	Totally disagree	0.12	0.09	0.27	0.08	0.05	0.12	0.12	0.14	0.08	0.07	0.3	0.22	0.13	0.18	0.07	0.13	0.1	0.14	0.06	0.07	0.1	0.07	0.1	0.06	0.1	0.12	0.11	0.18	0.05	0.1
	Ne sait pas	1406	22	133	73	37	66	85	19	138	106	44	64	82	9	24	20	59	91	12	24	7	39	39	47	92	47	13	73	30	22
	Don't know	0.05	0.02	0.13	0.07	0.04	0.05	0.06	0.06	0.14	0.11	0.04	0.06	0.08	0.01	0.02	0.04	0.06	0.09	0.02	0.03	0.01	0.04	0.04	0.05	0.09	0.05	0.01	0.07	0.03	0.02
	Total 'D'accord'	13112	544	325	510	621	583	710	126	500	489	265	396	448	456	619	261	512	398	324	634	304	563	551	591	418	549	456	449	717	632
	Total 'Agree'	0.5	0.54	0.32	0.51	0.62	0.48	0.46	0.43	0.5	0.48	0.26	0.4	0.45	0.45	0.6	0.52	0.51	0.4	0.64	0.61	0.61	0.54	0.54	0.58	0.42	0.52	0.46	0.45	0.68	0.6
	Total 'Pas d'accord'	11877	439	570	420	346	573	725	153	363	426	706	545	471	535	385	223	430	511	169	373	191	437	420	376	490	461	540	482	298	391
	Total 'Disagree'	0.45	0.44	0.55	0.42	0.34	0.47	0.48	0.51	0.36	0.41	0.7	0.54	0.47	0.54	0.38	0.44	0.43	0.51	0.34	0.36	0.38	0.42	0.42	0.37	0.49	0.43	0.53	0.48	0.29	0.38

## Sheet: QA2_3
								Eurobarometer - 97.4
		VOL A weighted					Terrain/Fieldwork : 30/05 - 28/06/2022
	QA2.3. Dans quelle mesure êtes-vous d’accord ou pas d’accord avec le fait que chacun des acteurs suivants en fait assez pour s’assurer que la transition écologique est socialement juste ?						QA2.3. To what extent do you agree or disagree that each of the following actors is doing enough to ensure that the green transition is fair?
	Le Gouvernement (NATIONALITÉ)						The (NATIONALITY) government
	Base: Ensemble						Base: All Respondents
<<Back to content		UE27 EU27	BE	BG	CZ	DK	D-W	DE	D-E	EE	IE	EL	ES	FR	HR	IT	CY	LV	LT	LU	HU	MT	NL	AT	PL	PT	RO	SI	SK	FI	SE
	Total	26395	1004	1027	1002	1004	1222	1520	298	1001	1022	1015	1005	1001	1001	1028	504	1000	1000	505	1031	503	1039	1011	1014	1000	1056	1009	1004	1044	1045
	Tout à fait d'accord	3661	108	97	110	178	133	160	28	113	104	71	123	88	153	250	67	98	68	91	179	120	108	189	191	103	190	172	69	199	134
	Totally agree	0.14	0.11	0.09	0.11	0.18	0.11	0.11	0.09	0.11	0.1	0.07	0.12	0.09	0.15	0.24	0.13	0.1	0.07	0.18	0.18	0.24	0.1	0.19	0.19	0.1	0.18	0.17	0.07	0.19	0.13
	Plutôt d'accord	8647	392	221	331	454	480	566	86	435	385	238	245	249	297	363	186	365	367	246	413	201	344	375	362	320	319	229	262	546	491
	Tend to agree	0.33	0.39	0.21	0.33	0.45	0.39	0.37	0.29	0.44	0.38	0.24	0.24	0.25	0.3	0.35	0.37	0.36	0.37	0.49	0.4	0.4	0.33	0.37	0.36	0.32	0.3	0.23	0.26	0.52	0.47
	Plutôt pas d'accord	8944	365	274	370	275	421	535	114	287	363	384	323	390	346	307	166	338	354	119	311	120	407	289	326	391	370	424	349	196	274
	Tend to disagree	0.34	0.36	0.27	0.37	0.28	0.35	0.35	0.38	0.29	0.36	0.38	0.32	0.39	0.35	0.3	0.33	0.34	0.35	0.24	0.3	0.24	0.39	0.28	0.32	0.39	0.35	0.42	0.35	0.19	0.26
	Pas du tout d'accord	4049	124	296	142	74	161	224	64	82	96	287	249	217	192	70	68	150	143	37	104	52	163	133	99	98	126	161	263	78	137
	Totally disagree	0.15	0.12	0.29	0.14	0.07	0.13	0.15	0.21	0.08	0.09	0.28	0.25	0.22	0.19	0.07	0.13	0.15	0.14	0.07	0.1	0.1	0.16	0.13	0.1	0.1	0.12	0.16	0.26	0.08	0.13
	Ne sait pas	1094	15	141	49	23	27	34	7	84	74	35	65	57	13	38	17	50	68	11	24	10	17	26	37	87	52	23	61	25	8
	Don't know	0.04	0.02	0.14	0.05	0.02	0.02	0.02	0.03	0.08	0.07	0.03	0.07	0.05	0.01	0.04	0.04	0.05	0.07	0.02	0.02	0.02	0.02	0.03	0.03	0.09	0.05	0.02	0.06	0.02	0.01
	Total 'D'accord'	12308	499	317	442	632	613	726	113	548	489	309	368	337	449	613	253	463	435	338	592	321	452	564	552	423	508	401	331	745	625
	Total 'Agree'	0.47	0.5	0.3	0.44	0.63	0.5	0.48	0.38	0.55	0.48	0.31	0.36	0.34	0.45	0.59	0.5	0.46	0.44	0.67	0.58	0.64	0.43	0.56	0.55	0.42	0.48	0.4	0.33	0.71	0.6
	Total 'Pas d'accord'	12993	489	569	512	350	582	759	178	369	459	671	572	607	538	377	234	487	497	156	415	172	570	421	424	490	496	585	612	274	411
	Total 'Disagree'	0.49	0.48	0.56	0.51	0.35	0.48	0.5	0.59	0.37	0.45	0.66	0.57	0.61	0.54	0.37	0.46	0.49	0.49	0.31	0.4	0.34	0.55	0.41	0.42	0.49	0.47	0.58	0.61	0.27	0.39

## Sheet: QA2_4
								Eurobarometer - 97.4
		VOL A weighted					Terrain/Fieldwork : 30/05 - 28/06/2022
	QA2.4. Dans quelle mesure êtes-vous d’accord ou pas d’accord avec le fait que chacun des acteurs suivants en fait assez pour s’assurer que la transition écologique est socialement juste ?						QA2.4. To what extent do you agree or disagree that each of the following actors is doing enough to ensure that the green transition is fair?
	L’UE						The EU
	Base: Ensemble						Base: All Respondents
<<Back to content		UE27 EU27	BE	BG	CZ	DK	D-W	DE	D-E	EE	IE	EL	ES	FR	HR	IT	CY	LV	LT	LU	HU	MT	NL	AT	PL	PT	RO	SI	SK	FI	SE
	Total	26395	1004	1027	1002	1004	1222	1520	298	1001	1022	1015	1005	1001	1001	1028	504	1000	1000	505	1031	503	1039	1011	1014	1000	1056	1009	1004	1044	1045
	Tout à fait d'accord	3737	130	138	164	134	119	145	26	131	122	77	145	89	159	262	110	148	98	75	168	139	114	131	183	117	182	196	88	161	124
	Totally agree	0.14	0.13	0.13	0.16	0.13	0.1	0.09	0.09	0.13	0.12	0.08	0.15	0.09	0.16	0.26	0.22	0.15	0.1	0.15	0.16	0.28	0.11	0.13	0.18	0.12	0.17	0.19	0.09	0.16	0.12
	Plutôt d'accord	9588	444	325	373	421	422	501	78	426	431	334	315	278	392	391	239	488	415	205	505	250	387	373	509	347	427	309	333	502	440
	Tend to agree	0.36	0.44	0.32	0.37	0.42	0.34	0.33	0.26	0.42	0.42	0.33	0.31	0.28	0.39	0.38	0.47	0.49	0.41	0.41	0.49	0.5	0.37	0.37	0.5	0.35	0.4	0.31	0.33	0.48	0.42
	Plutôt pas d'accord	8039	310	184	277	306	442	541	100	237	294	312	276	369	295	278	96	222	241	129	263	87	364	284	227	325	324	381	257	265	305
	Tend to disagree	0.31	0.31	0.18	0.28	0.31	0.36	0.36	0.34	0.24	0.29	0.31	0.27	0.37	0.29	0.27	0.19	0.22	0.24	0.25	0.26	0.17	0.35	0.28	0.23	0.32	0.31	0.38	0.26	0.25	0.29
	Pas du tout d'accord	3191	104	160	112	84	183	255	72	52	65	207	171	160	126	52	34	81	99	68	56	14	120	158	43	87	59	104	192	77	154
	Totally disagree	0.12	0.1	0.16	0.11	0.08	0.15	0.17	0.24	0.05	0.06	0.2	0.17	0.16	0.13	0.05	0.07	0.08	0.1	0.13	0.05	0.03	0.12	0.16	0.04	0.09	0.06	0.1	0.19	0.07	0.15
	Ne sait pas	1839	16	219	77	59	56	78	22	156	109	85	99	106	29	46	26	62	146	28	39	13	54	64	52	124	64	19	134	39	23
	Don't know	0.07	0.02	0.21	0.08	0.06	0.05	0.05	0.07	0.16	0.11	0.08	0.1	0.1	0.03	0.04	0.05	0.06	0.15	0.06	0.04	0.02	0.05	0.06	0.05	0.12	0.06	0.02	0.13	0.04	0.02
	Total 'D'accord'	13325	574	463	537	555	541	646	104	556	553	410	460	367	551	653	349	635	514	280	673	390	501	504	693	464	609	505	422	663	564
	Total 'Agree'	0.5	0.57	0.45	0.53	0.55	0.44	0.42	0.35	0.55	0.54	0.41	0.46	0.37	0.55	0.64	0.69	0.64	0.51	0.56	0.65	0.78	0.48	0.5	0.68	0.47	0.57	0.5	0.42	0.64	0.54
	Total 'Pas d'accord'	11231	414	345	389	390	625	797	172	289	360	519	447	529	421	330	129	303	340	197	319	101	484	443	270	412	383	485	449	342	458
	Total 'Disagree'	0.43	0.41	0.34	0.39	0.39	0.51	0.53	0.58	0.29	0.35	0.51	0.44	0.53	0.42	0.32	0.26	0.3	0.34	0.38	0.31	0.2	0.47	0.44	0.27	0.41	0.37	0.48	0.45	0.32	0.44

[truncated: 72 more sheets: QA3_1, QA3_2, QA3_3, QA4, QA5_1, QA5_2, QA6, QA7, QA8_1, QA8_2, QA8_3, QA9A, QA9B, QA9T, QA10_1, QA10_2, QA10_3, QA10_4, QA10_5, QA11 …]
