# Supplementary material for: Considering justice as a planning principle helps navigate a diversity of future energy infrastructure designs
Source: Research Square preprint supplement (doi:10.21203/rs.3.rs-4256136/v1), 2024-12-18
Supplement: Supplementary file 2 [file ebs_492_volume_A.xls]

## Sheet: Index
B2'!A1	B Pays			B Country
Q1NAT'!A1	Q1NAT Quelle est votre nationalité ? Veuillez indiquer le(s) pays qui s'applique(nt). (PLUSIEURS RÉPONSES POSSIBLES)			Q1NAT What is your nationality? Please tell me the country(ies) that applies(y). (MULTIPLE ANSWERS POSSIBLE)
QB1'!A1	QB1 Pour vous, que représente la politique énergétique commune de l'UE ? (MAX. 3 RÉPONSES)			QB1 What does EU energy policy mean to you? (MAX. 3 ANSWERS)
QB2.1'!A1	QB2.1 Dans quelle mesure êtes-vous d'accord ou pas d'accord avec les propositions suivantes ?	L'UE doit garantir l'accès à l'énergie à tous les citoyens de l'UE		QB2.1 To what extent do you agree or disagree with the following statements?	The EU must secure access to energy to all EU citizens
QB2.2'!A1	QB2.2 Dans quelle mesure êtes-vous d'accord ou pas d'accord avec les propositions suivantes ?	L'UE doit garantir l'accès à des énergies propres, p.ex. en promouvant la transition entre les énergies fossiles et des sources d'énergies émettant peu de gaz à effet de serre		QB2.2 To what extent do you agree or disagree with the following statements?	The EU must ensure access to clean energy, e.g. encourage a move away from fossil fuels towards energy sources with low greenhouse gas emissions
QB2.3'!A1	QB2.3 Dans quelle mesure êtes-vous d'accord ou pas d'accord avec les propositions suivantes ?	L'UE doit garantir l'accès à une énergie financièrement abordable, p.ex. en garantissant des prix de marché compétitifs, en particulier afin de réduire le nombre de personnes dans l'incapacité de payer leurs factures d'énergie		QB2.3 To what extent do you agree or disagree with the following statements?	The EU must ensure access to affordable energy, e.g. ensure competitive market prices, in particular to reduce the number of people unable to pay their energy bills
QB2.4'!A1	QB2.4 Dans quelle mesure êtes-vous d'accord ou pas d'accord avec les propositions suivantes ?	La coopération entre les États membres de l'Union Européenne doit encore être renforcée, afin d'offrir à tous les Européens l'accès à une énergie sûre, financièrement abordable et propre		QB2.4 To what extent do you agree or disagree with the following statements?	Cooperation between European Member States should be further strengthened to give all Europeans access to secure, financially affordable and clean energy
QB3.1'!A1	QB3.1 Dans quelle mesure êtes-vous d'accord ou pas d'accord avec les énoncés suivants ? Afin de garantir l'accès à une énergie sûre, il est nécessaire…	De renforcer la coopération transfrontalière dans l'UE et la solidarité entre États membres en cas de crises énergétiques		QB3.1 To what extent do you agree or disagree with the following statements? In order to ensure access to secure energy, it is necessary…	To reinforce EU cooperation across borders and solidarity between Member States in the event of energy crises
QB3.2'!A1	QB3.2 Dans quelle mesure êtes-vous d'accord ou pas d'accord avec les énoncés suivants ? Afin de garantir l'accès à une énergie sûre, il est nécessaire…	Que l'UE diversifie ses fournisseurs externes d'énergie		QB3.2 To what extent do you agree or disagree with the following statements? In order to ensure access to secure energy, it is necessary…	For the EU to diversify its external energy suppliers
QB3.3'!A1	QB3.3 Dans quelle mesure êtes-vous d'accord ou pas d'accord avec les énoncés suivants ? Afin de garantir l'accès à une énergie sûre, il est nécessaire…	Que l'UE parle d'une seule voix dans le cadre des négociations avec les fournisseurs externes d'énergie		QB3.3 To what extent do you agree or disagree with the following statements? In order to ensure access to secure energy, it is necessary…	For the EU to speak with one voice when negotiating with external energy suppliers
QB3.4'!A1	QB3.4 Dans quelle mesure êtes-vous d'accord ou pas d'accord avec les énoncés suivants ? Afin de garantir l'accès à une énergie sûre, il est nécessaire…	D'avoir un réseau d'énergie bien connecté dans l'ensemble de l'UE		QB3.4 To what extent do you agree or disagree with the following statements? In order to ensure access to secure energy, it is necessary…	To have a well-connected energy network across the EU
QB3.5'!A1	QB3.5 Dans quelle mesure êtes-vous d'accord ou pas d'accord avec les énoncés suivants ? Afin de garantir l'accès à une énergie sûre, il est nécessaire…	De renforcer la coopération entre États membres de l'UE en matière de cybersécurité dans le domaine de l'énergie		QB3.5 To what extent do you agree or disagree with the following statements? In order to ensure access to secure energy, it is necessary…	To have more cooperation on cybersecurity in the field of energy between EU Member States
QB3.6'!A1	QB3.6 Dans quelle mesure êtes-vous d'accord ou pas d'accord avec les énoncés suivants ? Afin de garantir l'accès à une énergie sûre, il est nécessaire…	De garantir la sûreté et la sécurité de l'énergie nucléaire dans l'UE		QB3.6 To what extent do you agree or disagree with the following statements? In order to ensure access to secure energy, it is necessary…	To ensure that nuclear energy is safe and secure in the EU
QB3.7'!A1	QB3.7 Dans quelle mesure êtes-vous d'accord ou pas d'accord avec les énoncés suivants ? Afin de garantir l'accès à une énergie sûre, il est nécessaire…	Que l'UE surveille les investissements étrangers dans les infrastructures énergétiques stratégiques dans l'UE		QB3.7 To what extent do you agree or disagree with the following statements? In order to ensure access to secure energy, it is necessary…	For the EU to monitor foreign investments in strategic energy infrastructure in the EU
QB4.1'!A1	QB4.1 Dans quelle mesure êtes-vous d'accord ou pas d'accord avec les énoncés suivants ? Il devrait être de la responsabilité de l'UE de …	Soutenir les mesures visant à améliorer la performance énergétique des bâtiments		QB4.1 To what extent do you agree or disagree with the following statements? It should be the EU's responsibility to …	Support measures to increase the energy performance of buildings
QB4.2'!A1	QB4.2 Dans quelle mesure êtes-vous d'accord ou pas d'accord avec les énoncés suivants ? Il devrait être de la responsabilité de l'UE de …	Encourager davantage l'investissement dans les énergies renouvelables, p.ex. éolienne, solaire		QB4.2 To what extent do you agree or disagree with the following statements? It should be the EU's responsibility to …	Encourage more investment in renewable energy e.g. wind, solar
QB4.3'!A1	QB4.3 Dans quelle mesure êtes-vous d'accord ou pas d'accord avec les énoncés suivants ? Il devrait être de la responsabilité de l'UE de …	Encourager davantage l'investissement dans la recherche et l'innovation en matière d'énergie		QB4.3 To what extent do you agree or disagree with the following statements? It should be the EU's responsibility to …	Encourage more investment in energy research and innovation
QB4.4'!A1	QB4.4 Dans quelle mesure êtes-vous d'accord ou pas d'accord avec les énoncés suivants ? Il devrait être de la responsabilité de l'UE de …	Donner aux villes et aux communautés locales les moyens d'aller vers des énergies propres		QB4.4 To what extent do you agree or disagree with the following statements? It should be the EU's responsibility to …	Empower cities and local communities to move towards clean energy
QB4.5'!A1	QB4.5 Dans quelle mesure êtes-vous d'accord ou pas d'accord avec les énoncés suivants ? Il devrait être de la responsabilité de l'UE de …	Soutenir les pays hors de l'UE dans leur transition vers des systèmes énergétiques plus propres		QB4.5 To what extent do you agree or disagree with the following statements? It should be the EU's responsibility to …	Support non-EU countries in moving to cleaner energy systems
QB5.1'!A1	QB5.1 Dans quelle mesure êtes-vous d'accord ou pas d'accord avec les énoncés suivants ? Il devrait être de la responsabilité de l'UE de…	Garantir que la concurrence accrue sur les marchés de l'énergie de l'UE se traduise par des prix plus compétitifs et plus abordables pour les consommateurs		QB5.1 To what extent do you agree or disagree with the following statements? It should be the EU's responsibility to…	Ensure that increased competition in EU energy markets translates into more competitive and affordable prices for consumers
QB5.2'!A1	QB5.2 Dans quelle mesure êtes-vous d'accord ou pas d'accord avec les énoncés suivants ? Il devrait être de la responsabilité de l'UE de…	Lutter contre la pauvreté énergétique et assurer une transition énergétique juste, afin qu'aucun citoyen et qu'aucune région ne soient laissés de côté		QB5.2 To what extent do you agree or disagree with the following statements? It should be the EU's responsibility to…	Address energy poverty and ensure a fair energy transition so that no citizen or region is left behind
QB5.3'!A1	QB5.3 Dans quelle mesure êtes-vous d'accord ou pas d'accord avec les énoncés suivants ? Il devrait être de la responsabilité de l'UE de…	Faciliter le choix des sources et fournisseurs d'énergie pour les consommateurs		QB5.3 To what extent do you agree or disagree with the following statements? It should be the EU's responsibility to…	Facilitate consumers' choice of energy sources and suppliers
QB5.4'!A1	QB5.4 Dans quelle mesure êtes-vous d'accord ou pas d'accord avec les énoncés suivants ? Il devrait être de la responsabilité de l'UE de…	Donner aux consommateurs les moyens de produire et de consommer leur propre énergie		QB5.4 To what extent do you agree or disagree with the following statements? It should be the EU's responsibility to…	Empower consumers to produce and consume their own energy
QB6'!A1	QB6 Reconnaissez-vous cette étiquette?			QB6 Do you recognise the following label?
QB7'!A1	QB7 Savez-vous qui est à l'origine de cette étiquette ?			QB7 Do you know who is responsible for this label?
QB8'!A1	QB8 Est-ce que l'étiquette énergétique UE a influencé votre choix lors de l'achat d'appareils électriques (réfrigérateurs, machines à laver le linge, lave-vaisselles, télévisions…)?		(SI 'CEUX QUI ONT RECONNU L'ÉTIQUETTE', CODE 1 OU 2 EN QB6)	QB8 Did the EU energy label have an influence on the choice of your purchase of electric appliances (fridges, washing machines, dish washers, televisions…)?		(IF 'THOSE WHO RECOGNISED THE LABEL', CODE 1 OR 2 IN QB6)
QB9'!A1	QB9 Selon vous, parmi les sujets suivants relatifs à l'énergie, lesquels l'Union européenne devrait-elle traiter en priorité au cours des 10 prochaines années ? (MAX. 3 RÉPONSES)			QB9 In your opinion, which of the following energy issues should the European Union tackle as a priority over the next 10 years? (MAX. 3 ANSWERS)
D1.1'!A1	D1.1 A propos de politique, les gens parlent de "droite" et de "gauche". Vous-même, voudriez-vous situer votre position sur cette échelle ?			D1.1 In political matters people talk of "the left" and "the right". How would you place your views on this scale? (SHOW SCREEN) - (INT.: DO NOT PROMPT - IF CONTACT HESITATES, TRY AGAIN)
D1.2'!A1	D1.2 A propos de politique, les gens parlent de "droite" et de "gauche". Vous-même, voudriez-vous situer votre position sur cette échelle ?			D1.2 In political matters people talk of "the left" and "the right". How would you place your views on this scale? (SHOW SCREEN) - (INT.: DO NOT PROMPT - IF CONTACT HESITATES, TRY AGAIN)
D1.3'!A1	D1.3 A propos de politique, les gens parlent de "droite" et de "gauche". Vous-même, voudriez-vous situer votre position sur cette échelle ?			D1.3 In political matters people talk of "the left" and "the right". How would you place your views on this scale? (SHOW SCREEN) - (INT.: DO NOT PROMPT - IF CONTACT HESITATES, TRY AGAIN)
D7.1'!A1	D7.1 Laquelle des propositions suivantes correspond le mieux à votre situation actuelle ?			D7.1 Which of the following best corresponds to your own current situation?
D7.2'!A1	D7.2 Laquelle des propositions suivantes correspond le mieux à votre situation actuelle ?			D7.2 Which of the following best corresponds to your own current situation?
D7.3'!A1	D7.3 Laquelle des propositions suivantes correspond le mieux à votre situation actuelle ?			D7.3 Which of the following best corresponds to your own current situation?
D8'!A1	D8 A quel âge avez-vous arrêté vos études à temps complet ?			D8 How old were you when you stopped full-time education? (INT: MAKE SURE THE RESPONDENT UNDERSTANDS THAT D8 IS ABOUT FULL-TIME EDUCATION) - (IF "STILL STUDYING", CODE ‘00’ - IF "NO EDUCATION" CODE '01' - IF "REFUSAL" CODE '98' - IF "DK" CODE '99')
D10'!A1	D10 Sexe du répondant.			D10 Gender.
D11'!A1	D11 Quel est votre âge?			D11 How old are you?
D112'!A1	D11 Quel est votre âge?			D11 How old are you?
D15a.1'!A1	D15a.1 Quelle est votre profession actuelle ?			D15a.1 What is your current occupation?
D15a.2'!A1	D15a.2 Quelle est votre profession actuelle ?			D15a.2 What is your current occupation?
C14'!A1	C14 Catégorie socioprofessionnelle			C14 Socio-professional category
D15b.1'!A1	D15b.1 Exerciez-vous une activité professionnelle rémunérée auparavant ? Laquelle en dernier lieu ?		(SI 'NE TRAVAILLE PAS ACTUELLEMENT', CODE 1 A 4 EN D15a)	D15b.1 Did you do any paid work in the past? What was your last occupation?		(IF 'NOT CURRENTLY WORK', CODE 1 TO 4 IN D15a)
D15b.2'!A1	D15b.2 Exerciez-vous une activité professionnelle rémunérée auparavant ? Laquelle en dernier lieu ?		(SI 'NE TRAVAILLE PAS ACTUELLEMENT', CODE 1 A 4 EN D15a)	D15b.2 Did you do any paid work in the past? What was your last occupation?		(IF 'NOT CURRENTLY WORK', CODE 1 TO 4 IN D15a)
D25'!A1	D25 Diriez-vous que vous vivez … ? (LIRE)			D25 Would you say you live in a...? (READ OUT)
D40a'!A1	D40a Pouvez-vous me dire combien de personnes âgées de 15 ans et plus vivent dans votre foyer, y compris vous-même ? (NOTER EN CLAIR)			D40a Could you tell me how many people aged 15 years or more live in your household, yourself included? (WRITE DOWN)
D40b'!A1	D40b Pouvez-vous me dire combien d’enfants de moins de 10 ans vivent dans votre foyer ? (NOTER EN CLAIR)			D40b Could you tell me how many children less than 10 years old live in your household? (WRITE DOWN)
D40c'!A1	D40c Pouvez-vous me dire combien d’enfants de 10 à 14 ans vivent dans votre foyer ? (NOTER EN CLAIR)			D40c Could you tell me how many children aged 10 to 14 years old live in your household? (WRITE DOWN)
D40R'!A1	D40R - Composition du ménage			D40R - Household composition
D40'!A1	D40 - Compostion des ménages d'une personne			D40 - One-person households composition
D43a'!A1	D43a Possédez-vous un téléphone fixe dans votre foyer ?			D43a Do you own a fixed telephone in your household?
D43b'!A1	D43b Possédez-vous un téléphone mobile GSM portable personnel ?			D43b Do you own a personal mobile telephone?
D43'!A1	D43 - Téléphone fixe / portable			D43 - Landline / mobile
D60'!A1	D60 Sur ces douze derniers mois, diriez-vous que vous avez eu des difficultés à payer toutes vos factures à la fin du mois ... ?			D60 During the last twelve months, would you say you had difficulties to pay your bills at the end of the month…?
D62.1'!A1	D62.1 Pouvez-vous me dire si … ?	Vous utilisez Internet chez vous, dans votre maison		D62.1 Could you tell me if…?	You use the Internet at home, in your home
D62.2'!A1	D62.2 Pouvez-vous me dire si … ?	Vous utilisez Internet sur votre lieu de travail		D62.2 Could you tell me if…?	You use the Internet on your place of work
D62.3'!A1	D62.3 Pouvez-vous me dire si … ?	Vous utilisez Internet sur votre appareil mobile (ordinateur portable, smartphone, tablette, etc.)		D62.3 Could you tell me if…?	You use the Internet on your mobile device (laptop, smartphone, tablet, etc.)
D62.4'!A1	D62.4 Pouvez-vous me dire si … ?	Vous utilisez Internet ailleurs (école, université, cafés-internet, etc.)		D62.4 Could you tell me if…?	You use the Internet somewhere else (school, university, cyber-café, etc.)
D62R'!A1	D62R - Utilisation Internet			D62R - Use of the Internet
D63'!A1	D63 Vous considérez-vous et votre foyer comme appartenant à … ?			D63 Do you see yourself and your household belonging to…?
C1'!A1	C1 Indice de leadership d'opinion			C1 Opinion leadership index
C2'!A1	C2 - Indice d'intérêt pour la politique			C2 - Political interest index
D72.1'!A1	D72.1 Dans quelle mesure êtes-vous d'accord ou pas d'accord avec chacune des affirmations suivantes ? (MONTRER L'ÉCRAN – LIRE – UNE RÉPONSE PAR LIGNE)	Ma voix compte dans l'UE		D72.1 Please tell me to what extent you agree or disagree with each of the following statements. (SHOW SCREEN – READ OUT – ONE ANSWER PER LINE)	My voice counts in the EU
D72.2'!A1	D72.2 Dans quelle mesure êtes-vous d'accord ou pas d'accord avec chacune des affirmations suivantes ? (MONTRER L'ÉCRAN – LIRE – UNE RÉPONSE PAR LIGNE)	Ma voix compte en (NOTRE PAYS)		D72.2 Please tell me to what extent you agree or disagree with each of the following statements. (SHOW SCREEN – READ OUT – ONE ANSWER PER LINE)	My voice counts in (OUR COUNTRY)
D77'!A1	D77 Quand vous avez une opinion à laquelle vous tenez beaucoup, vous arrive-t-il de convaincre vos amis, vos collègues, vos relations d'adopter cette opinion ? Cela vous arrive-t-il … ?			D77 When you hold a strong opinion, do you ever find yourself persuading your friends, relatives or fellow workers to share your views? Does this happen...? (READ OUT - ONE ANSWER ONLY)

## Sheet: B2
Index						Eurobarometer 91.4
		VOLUME A Pondéré Weighted										Terrain/Fieldwork : 09/05 - 25/05/2019
	B Pays										B Country
		UE28 EU28	UE28-UK EU28-UK	BE	BG	CZ	DK	D-W	DE	D-E	EE	IE	EL	ES	FR	HR	IT	CY	LV	LT	LU	HU	MT	NL	AT	PL	PT	RO	SI	SK	FI	SE	UK
	TOTAL	27438	26416	1028	1032	1008	1004	992	1537	545	1003	1006	1016	1005	1007	997	1023	503	1007	1003	514	1027	495	1014	1027	1010	1009	1041	1008	1081	1003	1008	1022
	BELGIQUE	616	676	1028	0	0	0	0	0	0	0	0	0	0	0	0	0	0	0	0	0	0	0	0	0	0	0	0	0	0	0	0	0
		0.02	0.03	1	-	-	-	-	-	-	-	-	-	-	-	-	-	-	-	-	-	-	-	-	-	-	-	-	-	-	-	-	-
	DANMARK	308	337	0	0	0	1004	0	0	0	0	0	0	0	0	0	0	0	0	0	0	0	0	0	0	0	0	0	0	0	0	0	0
		0.01	0.01	-	-	-	1	-	-	-	-	-	-	-	-	-	-	-	-	-	-	-	-	-	-	-	-	-	-	-	-	-	-
	ELLADA	632	693	0	0	0	0	0	0	0	0	0	1016	0	0	0	0	0	0	0	0	0	0	0	0	0	0	0	0	0	0	0	0
		0.02	0.03	-	-	-	-	-	-	-	-	-	1	-	-	-	-	-	-	-	-	-	-	-	-	-	-	-	-	-	-	-	-
	ESPANA	2509	2751	0	0	0	0	0	0	0	0	0	0	1005	0	0	0	0	0	0	0	0	0	0	0	0	0	0	0	0	0	0	0
		0.09	0.1	-	-	-	-	-	-	-	-	-	-	1	-	-	-	-	-	-	-	-	-	-	-	-	-	-	-	-	-	-	-
	SUOMI	302	331	0	0	0	0	0	0	0	0	0	0	0	0	0	0	0	0	0	0	0	0	0	0	0	0	0	0	0	1003	0	0
		0.01	0.01	-	-	-	-	-	-	-	-	-	-	-	-	-	-	-	-	-	-	-	-	-	-	-	-	-	-	-	1	-	-
	FRANCE	3440	3773	0	0	0	0	0	0	0	0	0	0	0	1007	0	0	0	0	0	0	0	0	0	0	0	0	0	0	0	0	0	0
		0.13	0.14	-	-	-	-	-	-	-	-	-	-	-	1	-	-	-	-	-	-	-	-	-	-	-	-	-	-	-	-	-	-
	IRELAND	228	251	0	0	0	0	0	0	0	0	1006	0	0	0	0	0	0	0	0	0	0	0	0	0	0	0	0	0	0	0	0	0
		0.01	0.01	-	-	-	-	-	-	-	-	1	-	-	-	-	-	-	-	-	-	-	-	-	-	-	-	-	-	-	-	-	-
	ITALIA	3328	3650	0	0	0	0	0	0	0	0	0	0	0	0	0	1023	0	0	0	0	0	0	0	0	0	0	0	0	0	0	0	0
		0.12	0.14	-	-	-	-	-	-	-	-	-	-	-	-	-	1	-	-	-	-	-	-	-	-	-	-	-	-	-	-	-	-
	LUXEMBOURG	29	32	0	0	0	0	0	0	0	0	0	0	0	0	0	0	0	0	0	514	0	0	0	0	0	0	0	0	0	0	0	0
		-	-	-	-	-	-	-	-	-	-	-	-	-	-	-	-	-	-	-	1	-	-	-	-	-	-	-	-	-	-	-	-
	NEDERLAND	889	975	0	0	0	0	0	0	0	0	0	0	0	0	0	0	0	0	0	0	0	0	1014	0	0	0	0	0	0	0	0	0
		0.03	0.04	-	-	-	-	-	-	-	-	-	-	-	-	-	-	-	-	-	-	-	-	1	-	-	-	-	-	-	-	-	-
	ÖSTERREICH	480	527	0	0	0	0	0	0	0	0	0	0	0	0	0	0	0	0	0	0	0	0	0	1027	0	0	0	0	0	0	0	0
		0.02	0.02	-	-	-	-	-	-	-	-	-	-	-	-	-	-	-	-	-	-	-	-	-	1	-	-	-	-	-	-	-	-
	PORTUGAL	539	591	0	0	0	0	0	0	0	0	0	0	0	0	0	0	0	0	0	0	0	0	0	0	0	1009	0	0	0	0	0	0
		0.02	0.02	-	-	-	-	-	-	-	-	-	-	-	-	-	-	-	-	-	-	-	-	-	-	-	1	-	-	-	-	-	-
	SVERIGE	509	558	0	0	0	0	0	0	0	0	0	0	0	0	0	0	0	0	0	0	0	0	0	0	0	0	0	0	0	0	1008	0
		0.02	0.02	-	-	-	-	-	-	-	-	-	-	-	-	-	-	-	-	-	-	-	-	-	-	-	-	-	-	-	-	1	-
	DEUTSCHLAND WEST	3572	3917	0	0	0	0	992	1231	0	0	0	0	0	0	0	0	0	0	0	0	0	0	0	0	0	0	0	0	0	0	0	0
		0.13	0.15	-	-	-	-	1	0.8	-	-	-	-	-	-	-	-	-	-	-	-	-	-	-	-	-	-	-	-	-	-	-	-
	DEUTSCHLAND OST	889	975	0	0	0	0	0	306	545	0	0	0	0	0	0	0	0	0	0	0	0	0	0	0	0	0	0	0	0	0	0	0
		0.03	0.04	-	-	-	-	-	0.2	1	-	-	-	-	-	-	-	-	-	-	-	-	-	-	-	-	-	-	-	-	-	-	-
	UNITED KINGDOM	3348	0	0	0	0	0	0	0	0	0	0	0	0	0	0	0	0	0	0	0	0	0	0	0	0	0	0	0	0	0	0	1022
		0.12	-	-	-	-	-	-	-	-	-	-	-	-	-	-	-	-	-	-	-	-	-	-	-	-	-	-	-	-	-	-	1
	BALGARIJA	416	456	0	1032	0	0	0	0	0	0	0	0	0	0	0	0	0	0	0	0	0	0	0	0	0	0	0	0	0	0	0	0
		0.02	0.02	-	1	-	-	-	-	-	-	-	-	-	-	-	-	-	-	-	-	-	-	-	-	-	-	-	-	-	-	-	-
	KYPROS	47	52	0	0	0	0	0	0	0	0	0	0	0	0	0	0	503	0	0	0	0	0	0	0	0	0	0	0	0	0	0	0
		-	-	-	-	-	-	-	-	-	-	-	-	-	-	-	-	1	-	-	-	-	-	-	-	-	-	-	-	-	-	-	-
	CESKA REPUBLIKA	588	644	0	0	1008	0	0	0	0	0	0	0	0	0	0	0	0	0	0	0	0	0	0	0	0	0	0	0	0	0	0	0
		0.02	0.02	-	-	1	-	-	-	-	-	-	-	-	-	-	-	-	-	-	-	-	-	-	-	-	-	-	-	-	-	-	-
	EESTI	74	81	0	0	0	0	0	0	0	1003	0	0	0	0	0	0	0	0	0	0	0	0	0	0	0	0	0	0	0	0	0	0
		-	-	-	-	-	-	-	-	-	1	-	-	-	-	-	-	-	-	-	-	-	-	-	-	-	-	-	-	-	-	-	-
	MAGYARORSZAG	558	612	0	0	0	0	0	0	0	0	0	0	0	0	0	0	0	0	0	0	1027	0	0	0	0	0	0	0	0	0	0	0
		0.02	0.02	-	-	-	-	-	-	-	-	-	-	-	-	-	-	-	-	-	-	1	-	-	-	-	-	-	-	-	-	-	-
	LATVIA	109	119	0	0	0	0	0	0	0	0	0	0	0	0	0	0	0	1007	0	0	0	0	0	0	0	0	0	0	0	0	0	0
		-	0.01	-	-	-	-	-	-	-	-	-	-	-	-	-	-	-	1	-	-	-	-	-	-	-	-	-	-	-	-	-	-
	LIETUVA	160	175	0	0	0	0	0	0	0	0	0	0	0	0	0	0	0	0	1003	0	0	0	0	0	0	0	0	0	0	0	0	0
		0.01	0.01	-	-	-	-	-	-	-	-	-	-	-	-	-	-	-	-	1	-	-	-	-	-	-	-	-	-	-	-	-	-
	MALTA	23	25	0	0	0	0	0	0	0	0	0	0	0	0	0	0	0	0	0	0	0	495	0	0	0	0	0	0	0	0	0	0
		-	-	-	-	-	-	-	-	-	-	-	-	-	-	-	-	-	-	-	-	-	1	-	-	-	-	-	-	-	-	-	-
	POLSKA	2127	2332	0	0	0	0	0	0	0	0	0	0	0	0	0	0	0	0	0	0	0	0	0	0	1010	0	0	0	0	0	0	0
		0.08	0.09	-	-	-	-	-	-	-	-	-	-	-	-	-	-	-	-	-	-	-	-	-	-	1	-	-	-	-	-	-	-
	ROMANIA	1072	1175	0	0	0	0	0	0	0	0	0	0	0	0	0	0	0	0	0	0	0	0	0	0	0	0	1041	0	0	0	0	0
		0.04	0.04	-	-	-	-	-	-	-	-	-	-	-	-	-	-	-	-	-	-	-	-	-	-	-	-	1	-	-	-	-	-
	SLOVENSKA REPUBLIC	292	320	0	0	0	0	0	0	0	0	0	0	0	0	0	0	0	0	0	0	0	0	0	0	0	0	0	0	1081	0	0	0
		0.01	0.01	-	-	-	-	-	-	-	-	-	-	-	-	-	-	-	-	-	-	-	-	-	-	-	-	-	-	1	-	-	-
	SLOVENIJA	112	123	0	0	0	0	0	0	0	0	0	0	0	0	0	0	0	0	0	0	0	0	0	0	0	0	0	1008	0	0	0	0
		0.01	0.01	-	-	-	-	-	-	-	-	-	-	-	-	-	-	-	-	-	-	-	-	-	-	-	-	-	1	-	-	-	-
	TURKIYE	0	0	0	0	0	0	0	0	0	0	0	0	0	0	0	0	0	0	0	0	0	0	0	0	0	0	0	0	0	0	0	0
		-	-	-	-	-	-	-	-	-	-	-	-	-	-	-	-	-	-	-	-	-	-	-	-	-	-	-	-	-	-	-	-
	HRVATSKA	241	265	0	0	0	0	0	0	0	0	0	0	0	0	997	0	0	0	0	0	0	0	0	0	0	0	0	0	0	0	0	0
		0.01	0.01	-	-	-	-	-	-	-	-	-	-	-	-	1	-	-	-	-	-	-	-	-	-	-	-	-	-	-	-	-	-

## Sheet: Q1NAT
Index						Eurobarometer 91.4
		VOLUME A Pondéré Weighted										Terrain/Fieldwork : 09/05 - 25/05/2019
	Q1NAT Quelle est votre nationalité ? Veuillez indiquer le(s) pays qui s'applique(nt). (PLUSIEURS RÉPONSES POSSIBLES)										Q1NAT What is your nationality? Please tell me the country(ies) that applies(y). (MULTIPLE ANSWERS POSSIBLE)
		UE28 EU28	UE28-UK EU28-UK	BE	BG	CZ	DK	D-W	DE	D-E	EE	IE	EL	ES	FR	HR	IT	CY	LV	LT	LU	HU	MT	NL	AT	PL	PT	RO	SI	SK	FI	SE	UK
	TOTAL	27438	26416	1028	1032	1008	1004	992	1537	545	1003	1006	1016	1005	1007	997	1023	503	1007	1003	514	1027	495	1014	1027	1010	1009	1041	1008	1081	1003	1008	1022
	Belgique	614	664	987	1	0	1	0	0	0	0	1	1	0	3	0	0	0	0	0	18	0	0	0	0	1	0	0	0	0	0	0	3
	Belgium	0.02	0.03	0.96	0	-	0	-	-	-	-	0	0	-	0	-	-	-	-	-	0.03	-	-	-	-	0	-	-	-	-	-	-	0
	Danemark	318	349	0	0	0	978	0	0	1	0	0	0	0	1	0	3	0	0	0	0	0	1	0	0	1	1	2	0	0	0	1	0
	Denmark	0.01	0.01	-	-	-	0.97	-	0	0	-	0	-	-	0	-	0	-	-	-	-	-	0	0	-	0	0	0	-	-	-	0	-
	Allemagne	4378	4785	1	2	8	5	948	1479	538	3	5	4	3	1	1	6	0	1	0	16	7	3	5	1	4	1	8	0	0	1	5	5
	Germany	0.16	0.18	0	0	0.01	0.01	0.96	0.96	0.99	0	0	0	0	0	0	0.01	-	0	-	0.03	0.01	0.01	0.01	0	0	0	0.01	-	-	0	0	0
	Grèce	661	717	4	1	0	2	4	6	2	0	1	1011	0	0	0	0	26	0	0	1	0	5	0	1	0	0	0	4	0	0	0	2
	Greece	0.02	0.03	0	0	-	0	0	0	0	-	0	0.99	-	-	-	-	0.05	-	-	0	-	0.01	-	0	-	-	-	0	-	-	-	0
	Espagne	2433	2658	4	0	0	2	3	3	0	0	2	0	961	3	0	0	0	0	0	3	1	0	0	1	0	3	0	0	0	0	0	3
	Spain	0.09	0.1	0	-	-	0	0	0	-	-	0	-	0.96	0	-	-	-	-	-	0.01	0	-	-	0	-	0	-	-	-	-	-	0
	France	3431	3754	15	0	0	0	6	7	0	0	2	0	6	988	0	0	1	0	0	41	0	3	4	0	0	0	0	0	0	0	0	2
	France	0.13	0.14	0.01	-	-	-	0.01	0	-	-	0	-	0.01	0.98	-	-	0	-	-	0.08	-	0.01	0	-	-	-	-	-	-	-	0	0
	Irlande	268	242	0	0	0	1	1	1	0	0	898	0	0	3	0	1	0	0	0	3	0	0	0	1	0	0	0	0	0	0	0	15
	Ireland	0.01	0.01	-	-	-	0	0	0	-	-	0.89	-	-	0	-	0	-	-	-	0.01	-	-	0	0	-	-	-	-	-	-	-	0.01
	Italie	3402	3703	17	0	0	0	7	9	2	0	4	1	5	2	0	1018	0	0	0	28	1	2	0	3	0	3	1	2	0	0	2	8
	Italy	0.12	0.14	0.02	-	-	-	0.01	0.01	0	-	0	0	0.01	0	-	0.99	-	-	-	0.05	0	0	0	0	-	0	0	0	-	-	0	0.01
	Luxembourg	22	24	2	0	0	0	0	0	0	0	0	0	0	0	0	1	0	0	0	317	0	0	0	0	0	2	0	0	0	0	0	0
	Luxembourg	0	0	0	-	-	-	-	-	-	-	-	-	-	-	-	0	-	-	-	0.62	-	-	0	-	-	0	-	-	-	-	-	-
	Pays-Bas	902	989	4	0	0	1	2	3	0	0	2	0	1	2	0	0	0	0	0	3	1	0	1004	1	0	1	0	0	0	0	1	0
	Netherlands	0.03	0.04	0	-	-	0	0	0	0	-	0	-	0	0	-	-	-	-	-	0.01	0	0	0.99	0	-	0	-	-	-	-	0	-
	Portugal	613	649	5	0	0	1	0	0	0	0	3	0	5	8	0	2	0	0	0	92	0	0	0	0	0	1004	0	0	0	0	0	6
	Portugal	0.02	0.02	0	-	-	0	-	-	-	-	0	-	0.01	0.01	-	0	-	-	-	0.18	-	-	-	-	-	1	-	-	-	-	-	0.01
	Royaume-Uni (Grande Bretagne, Irlande du Nord)	3074	38	2	0	0	2	4	4	0	2	23	0	1	2	0	0	4	1	0	9	0	8	3	0	0	0	0	0	0	2	1	928
	United Kingdom (Great Britain, Northern Ireland)	0.11	0	0	-	-	0	0	0	-	0	0.02	-	0	0	-	-	0.01	0	-	0.02	-	0.02	0	-	-	-	-	-	-	0	0	0.91
	Autriche	484	531	0	0	0	2	1	2	0	0	1	0	0	1	0	0	0	1	0	0	0	0	0	1015	0	0	0	0	1	0	1	0
	Austria	0.02	0.02	-	-	-	0	0	0	-	-	0	-	-	0	-	-	-	0	-	-	-	-	-	0.99	-	-	-	-	0	-	0	-
	Suède	511	561	2	0	1	4	0	0	0	1	5	0	0	0	0	0	0	0	0	2	0	0	1	1	0	0	0	0	1	0	1002	0
	Sweden	0.02	0.02	0	-	0	0	-	-	-	0	0.01	-	-	-	-	-	-	-	-	0	-	-	0	0	-	-	-	-	0	0	0.99	-
	Finlande	304	334	0	0	0	0	1	1	0	1	2	0	0	0	0	0	0	0	0	4	0	0	0	0	0	0	1	0	0	994	2	0
	Finland	0.01	0.01	-	-	-	-	0	0	-	0	0	-	-	-	-	-	-	-	-	0.01	-	-	-	-	-	-	0	-	-	0.99	0	-
	République de Chypre	69	68	0	0	0	0	4	5	1	0	2	0	1	0	0	0	465	0	0	0	0	0	0	0	0	0	0	0	1	0	0	2
	Republic of Cyprus	0	0	-	-	-	-	0	0	0	-	0	-	0	-	-	-	0.92	-	-	-	-	-	0	-	-	-	-	-	0	-	-	0
	République tchèque	594	652	1	0	1000	0	1	2	0	0	8	0	0	1	0	0	0	0	0	1	1	0	0	0	0	0	0	0	3	3	0	0
	Czech Republic	0.02	0.02	0	-	0.99	-	0	0	-	-	0.01	-	-	0	-	-	-	0	-	0	0	-	-	-	-	-	-	-	0	0	0	-
	Estonie	80	84	0	0	1	0	0	0	0	999	1	0	0	0	0	0	1	0	0	0	0	2	0	0	0	0	0	0	0	9	0	1
	Estonia	0	0	-	-	0	-	-	-	-	1	0	-	-	-	-	-	0	-	-	-	-	0	-	-	-	-	-	-	-	0.01	-	0
	Hongrie	593	635	0	1	0	1	2	4	1	1	2	0	0	0	2	0	0	0	0	3	1023	3	0	7	0	0	6	1	1	2	0	4
	Hungary	0.02	0.02	-	0	-	0	0	0	0	0	0	-	-	-	0	-	-	0	-	0.01	1	0.01	-	0.01	-	-	0.01	0	0	0	-	0
	Lettonie	124	126	0	0	0	1	0	0	0	0	7	0	1	0	0	0	0	1006	2	0	1	0	0	0	0	0	0	0	0	0	0	3
	Latvia	0	0	-	-	-	0	-	-	-	-	0.01	-	0	-	-	-	-	1	0	-	0	-	-	-	-	-	-	-	-	-	-	0
	Lituanie	197	181	0	0	0	2	0	0	0	1	5	0	1	0	0	0	1	0	1002	1	0	0	0	0	0	0	0	0	0	0	0	10
	Lithuania	0.01	0.01	-	-	-	0	-	-	-	0	0	-	0	-	-	-	0	-	1	0	-	-	-	-	-	-	-	-	-	-	-	0.01
	Malte	27	25	0	0	0	0	0	0	0	0	0	0	0	0	0	0	0	0	0	1	0	463	0	0	0	0	0	0	0	0	2	1
	Malta	0	0	-	-	-	-	-	-	-	-	-	-	-	-	-	-	-	-	-	0	-	0.94	-	-	-	-	-	-	-	-	0	0
	Pologne	2239	2392	4	0	0	2	7	10	2	1	33	0	2	2	0	0	1	1	0	0	1	0	1	0	1010	0	0	0	1	0	1	18
	Poland	0.08	0.09	0	-	-	0	0.01	0.01	0	0	0.03	-	0	0	-	-	0	0	-	-	0	-	0	-	1	-	-	-	0	-	0	0.02
	Slovaquie	306	324	0	1	5	0	0	0	0	0	2	0	0	0	0	0	0	0	0	0	0	0	0	1	0	0	0	0	1077	0	0	3
	Slovakia	0.01	0.01	-	0	0.01	-	-	0	0	-	0	-	-	-	-	-	-	-	-	-	-	-	-	0	-	-	-	-	1	-	-	0
	Slovénie	123	129	0	0	0	0	0	0	0	0	0	0	2	0	0	0	0	0	0	0	0	0	0	1	0	0	0	997	3	0	0	1
	Slovenia	0	0	-	-	-	-	-	-	-	-	-	-	0	-	-	-	-	-	-	-	-	-	-	0	-	-	-	0.99	0	-	-	0
	Bulgarie	432	473	0	1028	0	0	2	3	1	0	0	2	1	0	1	1	4	1	0	1	0	2	0	0	0	0	1	0	0	2	2	0
	Bulgaria	0.02	0.02	-	1	-	-	0	0	0	0	0	0	0	-	0	0	0.01	0	-	0	-	0	0	-	-	-	0	-	-	0	0	-
	Roumanie	1230	1281	3	4	0	1	9	11	0	0	5	0	17	2	0	2	7	0	0	1	4	6	0	5	0	1	1039	0	0	0	0	19
	Romania	0.04	0.05	0	0	-	0	0.01	0.01	-	-	0	-	0.02	0	-	0	0.01	-	-	0	0	0.01	0	0	-	0	1	-	-	-	-	0.02
	Croatie	258	279	0	0	1	0	2	3	1	0	2	0	0	0	997	0	0	0	0	1	0	1	0	3	0	0	0	12	0	0	1	1
	Croatia	0.01	0.01	-	-	0	-	0	0	0	-	0	-	-	-	1	-	-	-	-	0	-	0	-	0	-	-	-	0.01	-	-	0	0
	Autre pays	160	165	8	0	0	2	4	7	3	0	11	8	28	5	5	2	4	0	0	5	1	11	5	5	2	12	0	2	0	0	5	3
	Other countries	0.01	0.01	0.01	-	-	0	0	0	0.01	-	0.01	0.01	0.03	0	0.01	0	0.01	-	-	0.01	0	0.02	0.01	0	0	0.01	-	0	-	-	0	0
	NSP	0	0	0	0	0	0	0	0	0	0	0	0	0	0	0	0	0	0	0	0	0	0	0	0	0	0	0	0	0	0	0	0
	DK	-	-	-	-	-	-	-	-	-	-	-	-	-	-	-	-	-	-	-	-	-	-	-	-	-	-	-	-	-	-	-	-

## Sheet: QB1
Index						Eurobarometer 91.4
		VOLUME A Pondéré Weighted										Terrain/Fieldwork : 09/05 - 25/05/2019
	QB1 Pour vous, que représente la politique énergétique commune de l'UE ? (MAX. 3 RÉPONSES)										QB1 What does EU energy policy mean to you? (MAX. 3 ANSWERS)
		UE28 EU28	UE28-UK EU28-UK	BE	BG	CZ	DK	D-W	DE	D-E	EE	IE	EL	ES	FR	HR	IT	CY	LV	LT	LU	HU	MT	NL	AT	PL	PT	RO	SI	SK	FI	SE	UK
	TOTAL	27438	26416	1028	1032	1008	1004	992	1537	545	1003	1006	1016	1005	1007	997	1023	503	1007	1003	514	1027	495	1014	1027	1010	1009	1041	1008	1081	1003	1008	1022
	Renforcer la coopération entre les États membres de l'UE sur les questions énergétiques	6116	6277	297	239	203	323	299	487	205	281	139	262	119	206	189	253	130	175	222	149	256	92	288	341	195	269	187	180	218	274	387	120
	Reinforcing cooperation between EU Member States on energy matters	0.22	0.24	0.29	0.23	0.2	0.32	0.3	0.32	0.38	0.28	0.14	0.26	0.12	0.2	0.19	0.25	0.26	0.17	0.22	0.29	0.25	0.19	0.28	0.33	0.19	0.27	0.18	0.18	0.2	0.27	0.38	0.12
	Améliorer les infrastructures dans les États membres, et créer dans l'UE un marché intérieur de l'énergie performant et totalement intégré	5168	5258	202	178	151	189	254	401	152	133	167	260	169	130	182	210	107	150	97	106	156	80	232	296	200	303	240	183	158	102	174	114
	Improving infrastructure across Member States, and creating a well-functioning and fully integrated internal EU energy market	0.19	0.2	0.2	0.17	0.15	0.19	0.26	0.26	0.28	0.13	0.17	0.26	0.17	0.13	0.18	0.21	0.21	0.15	0.1	0.21	0.15	0.16	0.23	0.29	0.2	0.3	0.23	0.18	0.15	0.1	0.17	0.11
	Minimiser les risques de pannes de courant et de pénuries d'énergie en Europe	4079	4122	238	291	214	130	151	254	119	137	135	183	97	152	194	116	49	137	176	68	188	101	184	279	195	143	138	152	278	144	76	98
	Minimising risk of electricity black-outs and energy shortages in Europe	0.15	0.16	0.23	0.28	0.21	0.13	0.15	0.17	0.22	0.14	0.13	0.18	0.1	0.15	0.19	0.11	0.1	0.14	0.18	0.13	0.18	0.2	0.18	0.27	0.19	0.14	0.13	0.15	0.26	0.14	0.07	0.1
	Assurer la transition des énergies fossiles vers des sources d'énergie renouvelables pour lutter contre le changement climatique	11367	11268	435	250	293	521	552	824	249	352	413	436	453	409	357	378	220	327	328	216	359	149	614	443	317	487	314	406	329	605	629	333
	Shifting from fossil fuels to renewable energy sources to combat climate change	0.41	0.43	0.42	0.24	0.29	0.52	0.56	0.54	0.46	0.35	0.41	0.43	0.45	0.41	0.36	0.37	0.44	0.32	0.33	0.42	0.35	0.3	0.61	0.43	0.31	0.48	0.3	0.4	0.3	0.6	0.62	0.33
	Réduire la consommation d'énergie dans l'ensemble de l'UE, p.ex. en isolant les logements ou en achetant des produits à faible consommation énergétique	7796	7855	314	322	332	280	318	490	170	225	248	261	206	368	298	271	172	296	228	170	338	102	518	327	262	170	330	343	297	245	236	193
	Decreasing energy consumption across the EU, - i.e. insulating homes or purchasing energy-efficient products	0.28	0.3	0.31	0.31	0.33	0.28	0.32	0.32	0.31	0.22	0.25	0.26	0.2	0.37	0.3	0.27	0.34	0.29	0.23	0.33	0.33	0.21	0.51	0.32	0.26	0.17	0.32	0.34	0.27	0.24	0.23	0.19
	Garantir la sûreté et la sécurité de l'énergie nucléaire	5065	4914	290	284	270	139	137	214	78	160	224	141	141	225	132	213	61	197	365	110	147	147	165	267	165	180	161	186	393	298	198	178
	Ensuring nuclear energy is safe and secure	0.18	0.19	0.28	0.28	0.27	0.14	0.14	0.14	0.14	0.16	0.22	0.14	0.14	0.22	0.13	0.21	0.12	0.2	0.36	0.21	0.14	0.3	0.16	0.26	0.16	0.18	0.15	0.19	0.36	0.3	0.2	0.17
	Soutenir la transition des pays en développement vers des systèmes énergétiques propres et garantir des importations d'énergie sûres à partir de l'UE	5223	5155	200	123	120	200	207	319	110	81	201	160	203	184	177	204	73	97	117	89	160	103	244	253	196	157	223	176	154	247	302	159
	Supporting developing countries in moving to clean energy systems and ensuring secure energy imports from the EU	0.19	0.2	0.19	0.12	0.12	0.2	0.21	0.21	0.2	0.08	0.2	0.16	0.2	0.18	0.18	0.2	0.15	0.1	0.12	0.17	0.16	0.21	0.24	0.25	0.19	0.16	0.21	0.17	0.14	0.25	0.3	0.16
	Contribuer à la croissance économique et à l'emploi en investissant dans des technologies innovantes	6619	6671	256	198	147	206	180	278	97	171	219	376	337	253	266	344	140	194	211	135	191	116	304	249	199	306	231	202	180	273	335	163
	Contributing to economic growth and employment by investing in innovative technologies	0.24	0.25	0.25	0.19	0.15	0.21	0.18	0.18	0.18	0.17	0.22	0.37	0.34	0.25	0.27	0.34	0.28	0.19	0.21	0.26	0.19	0.23	0.3	0.24	0.2	0.3	0.22	0.2	0.17	0.27	0.33	0.16
	Des prix de l'énergie plus compétitifs pour les consommateurs	7463	7545	323	444	278	204	225	359	142	243	321	520	358	262	358	305	241	329	372	128	382	195	84	277	267	465	362	346	308	238	71	178
	More competitive energy prices for consumers	0.27	0.29	0.31	0.43	0.28	0.2	0.23	0.23	0.26	0.24	0.32	0.51	0.36	0.26	0.36	0.3	0.48	0.33	0.37	0.25	0.37	0.39	0.08	0.27	0.26	0.46	0.35	0.34	0.29	0.24	0.07	0.17
	Autre (SPONTANÉ)	484	430	5	5	17	15	23	35	11	26	31	8	14	26	9	9	3	23	16	14	11	5	9	18	16	24	12	35	14	8	17	28
	Other (SPONTANEOUS)	0.02	0.02	0	0.01	0.02	0.01	0.02	0.02	0.02	0.03	0.03	0.01	0.01	0.03	0.01	0.01	0.01	0.02	0.02	0.03	0.01	0.01	0.01	0.02	0.02	0.02	0.01	0.03	0.01	0.01	0.02	0.03
	Rien (SPONTANÉ)	966	674	4	17	42	2	23	34	9	42	19	42	16	37	19	29	4	50	26	6	48	5	19	13	26	18	39	20	23	10	18	107
	Nothing (SPONTANEOUS)	0.04	0.03	0	0.02	0.04	0	0.02	0.02	0.02	0.04	0.02	0.04	0.02	0.04	0.02	0.03	0.01	0.05	0.03	0.01	0.05	0.01	0.02	0.01	0.03	0.02	0.04	0.02	0.02	0.01	0.02	0.1
	NSP	1776	1130	7	43	40	117	15	24	11	135	48	9	73	67	33	44	16	92	29	12	11	28	20	6	65	42	35	20	28	30	61	228
	DK	0.06	0.04	0.01	0.04	0.04	0.12	0.01	0.02	0.02	0.13	0.05	0.01	0.07	0.07	0.03	0.04	0.03	0.09	0.03	0.02	0.01	0.06	0.02	0.01	0.06	0.04	0.03	0.02	0.03	0.03	0.06	0.22

## Sheet: QB2.1
Index						Eurobarometer 91.4
		VOLUME A Pondéré Weighted										Terrain/Fieldwork : 09/05 - 25/05/2019
	QB2.1 Dans quelle mesure êtes-vous d'accord ou pas d'accord avec les propositions suivantes ?										QB2.1 To what extent do you agree or disagree with the following statements?
	L'UE doit garantir l'accès à l'énergie à tous les citoyens de l'UE										The EU must secure access to energy to all EU citizens
		UE28 EU28	UE28-UK EU28-UK	BE	BG	CZ	DK	D-W	DE	D-E	EE	IE	EL	ES	FR	HR	IT	CY	LV	LT	LU	HU	MT	NL	AT	PL	PT	RO	SI	SK	FI	SE	UK
	TOTAL	27438	26416	1028	1032	1008	1004	992	1537	545	1003	1006	1016	1005	1007	997	1023	503	1007	1003	514	1027	495	1014	1027	1010	1009	1041	1008	1081	1003	1008	1022
	Tout à fait d'accord	16649	16160	560	677	533	648	721	1110	384	600	596	693	825	613	573	493	387	674	645	316	634	311	653	604	467	663	383	810	576	619	559	584
	Totally agree	0.61	0.61	0.55	0.66	0.53	0.65	0.73	0.72	0.71	0.6	0.59	0.68	0.82	0.61	0.57	0.48	0.77	0.67	0.64	0.61	0.62	0.63	0.64	0.59	0.46	0.66	0.37	0.8	0.53	0.62	0.56	0.57
	Plutôt d'accord	8471	8203	423	297	369	227	240	378	142	339	344	286	162	328	336	412	102	246	307	155	295	164	306	314	431	325	347	174	415	315	311	302
	Tend to agree	0.31	0.31	0.41	0.29	0.37	0.22	0.24	0.25	0.26	0.34	0.34	0.28	0.16	0.33	0.34	0.4	0.2	0.25	0.31	0.3	0.29	0.33	0.3	0.31	0.43	0.32	0.33	0.17	0.39	0.31	0.31	0.29
	Plutôt pas d'accord	1074	1072	38	19	64	37	17	25	7	24	27	29	5	14	53	69	4	21	19	11	62	0	22	74	68	4	189	15	37	46	83	30
	Tend to disagree	0.04	0.04	0.04	0.02	0.06	0.04	0.02	0.02	0.01	0.02	0.03	0.03	0.01	0.01	0.05	0.07	0.01	0.02	0.02	0.02	0.06	-	0.02	0.07	0.07	-	0.18	0.02	0.03	0.05	0.08	0.03
	Pas du tout d'accord	380	322	4	5	17	41	5	7	1	13	8	0	0	8	20	16	2	12	8	8	30	0	25	26	13	0	49	6	14	13	34	26
	Totally disagree	0.01	0.01	-	-	0.02	0.04	-	-	-	0.01	0.01	-	-	0.01	0.02	0.02	-	0.01	0.01	0.02	0.03	-	0.03	0.02	0.01	-	0.05	0.01	0.01	0.01	0.03	0.03
	NSP	864	659	3	33	26	51	8	17	12	26	31	8	12	44	16	34	8	53	24	24	7	19	8	10	31	17	73	3	39	10	20	80
	DK	0.03	0.03	-	0.03	0.02	0.05	0.01	0.01	0.02	0.03	0.03	0.01	0.01	0.04	0.02	0.03	0.02	0.05	0.02	0.05	-	0.04	0.01	0.01	0.03	0.02	0.07	-	0.04	0.01	0.02	0.08
	Total 'D'accord'	25120	24363	983	974	902	875	962	1488	525	940	940	979	988	941	909	904	489	920	951	471	929	475	958	918	898	988	730	984	991	934	871	886
	Total 'Agree'	0.92	0.92	0.96	0.95	0.9	0.87	0.97	0.97	0.97	0.94	0.93	0.96	0.98	0.94	0.91	0.88	0.97	0.92	0.95	0.91	0.91	0.96	0.94	0.9	0.89	0.98	0.7	0.97	0.92	0.93	0.87	0.86
	Total 'Pas d'accord'	1454	1394	42	24	81	78	22	32	8	37	35	29	5	22	72	85	6	34	28	19	91	0	48	100	82	4	238	21	51	59	117	56
	Total 'Disagree'	0.05	0.05	0.04	0.02	0.08	0.08	0.02	0.02	0.01	0.03	0.04	0.03	0.01	0.02	0.07	0.09	0.01	0.03	0.03	0.04	0.09	0	0.05	0.09	0.08	0	0.23	0.03	0.04	0.06	0.11	0.06

## Sheet: QB2.2
Index						Eurobarometer 91.4
		VOLUME A Pondéré Weighted										Terrain/Fieldwork : 09/05 - 25/05/2019
	QB2.2 Dans quelle mesure êtes-vous d'accord ou pas d'accord avec les propositions suivantes ?										QB2.2 To what extent do you agree or disagree with the following statements?
	L'UE doit garantir l'accès à des énergies propres, p.ex. en promouvant la transition entre les énergies fossiles et des sources d'énergies émettant peu de gaz à effet de serre										The EU must ensure access to clean energy, e.g. encourage a move away from fossil fuels towards energy sources with low greenhouse gas emissions
		UE28 EU28	UE28-UK EU28-UK	BE	BG	CZ	DK	D-W	DE	D-E	EE	IE	EL	ES	FR	HR	IT	CY	LV	LT	LU	HU	MT	NL	AT	PL	PT	RO	SI	SK	FI	SE	UK
	TOTAL	27438	26416	1028	1032	1008	1004	992	1537	545	1003	1006	1016	1005	1007	997	1023	503	1007	1003	514	1027	495	1014	1027	1010	1009	1041	1008	1081	1003	1008	1022
	Tout à fait d'accord	15725	15116	529	550	420	680	659	992	310	492	620	659	792	566	513	490	378	533	639	289	580	301	611	567	401	634	408	772	490	563	723	592
	Totally agree	0.57	0.57	0.51	0.53	0.42	0.68	0.67	0.64	0.57	0.49	0.62	0.65	0.79	0.56	0.51	0.48	0.75	0.53	0.64	0.56	0.56	0.61	0.6	0.55	0.4	0.63	0.39	0.76	0.45	0.56	0.72	0.58
	Plutôt d'accord	9100	8871	445	370	413	230	264	443	204	418	322	309	183	346	376	417	106	303	323	173	345	161	319	311	483	330	399	202	485	359	205	309
	Tend to agree	0.33	0.34	0.43	0.36	0.41	0.23	0.27	0.29	0.37	0.42	0.32	0.3	0.18	0.34	0.38	0.41	0.21	0.3	0.32	0.34	0.34	0.33	0.31	0.3	0.48	0.33	0.38	0.2	0.45	0.36	0.2	0.3
	Plutôt pas d'accord	1223	1231	40	39	114	39	42	58	12	28	25	31	4	28	48	63	5	54	13	19	70	0	56	90	65	3	151	21	42	56	41	31
	Tend to disagree	0.04	0.05	0.04	0.04	0.11	0.04	0.04	0.04	0.02	0.03	0.02	0.03	0.01	0.03	0.05	0.06	0.01	0.05	0.01	0.03	0.07	-	0.06	0.09	0.06	-	0.15	0.02	0.04	0.06	0.04	0.03
	Pas du tout d'accord	421	416	10	6	27	26	12	17	3	18	4	0	3	19	26	22	3	24	4	4	23	2	26	42	15	2	34	7	14	4	25	13
	Totally disagree	0.02	0.01	0.01	-	0.03	0.02	0.01	0.01	0.01	0.02	-	-	-	0.02	0.03	0.02	0.01	0.03	-	0.01	0.02	-	0.03	0.04	0.01	-	0.03	0.01	0.01	-	0.03	0.01
	NSP	968	784	5	68	34	29	14	27	16	47	36	17	23	47	34	31	11	94	24	29	9	31	2	16	46	40	49	6	50	21	14	77
	DK	0.04	0.03	0.01	0.07	0.03	0.03	0.01	0.02	0.03	0.04	0.04	0.02	0.02	0.05	0.03	0.03	0.02	0.09	0.03	0.06	0.01	0.06	-	0.02	0.05	0.04	0.05	0.01	0.05	0.02	0.01	0.08
	Total 'D'accord'	24825	23986	973	919	833	910	924	1435	514	910	942	968	974	912	889	908	484	835	962	462	925	463	930	878	884	964	807	974	976	922	927	901
	Total 'Agree'	0.9	0.91	0.94	0.89	0.83	0.91	0.94	0.93	0.94	0.91	0.94	0.95	0.97	0.9	0.89	0.89	0.96	0.83	0.96	0.9	0.9	0.94	0.91	0.85	0.88	0.96	0.77	0.96	0.9	0.92	0.92	0.88
	Total 'Pas d'accord'	1644	1646	50	45	141	65	54	75	15	46	29	31	7	48	74	84	8	78	17	22	92	2	83	133	80	5	185	29	56	60	67	44
	Total 'Disagree'	0.06	0.06	0.05	0.04	0.14	0.06	0.05	0.05	0.03	0.05	0.02	0.03	0.01	0.05	0.08	0.08	0.02	0.08	0.01	0.04	0.09	0	0.09	0.13	0.07	0	0.18	0.03	0.05	0.06	0.07	0.04

## Sheet: QB2.3
Index						Eurobarometer 91.4
		VOLUME A Pondéré Weighted										Terrain/Fieldwork : 09/05 - 25/05/2019
	QB2.3 Dans quelle mesure êtes-vous d'accord ou pas d'accord avec les propositions suivantes ?										QB2.3 To what extent do you agree or disagree with the following statements?
	L'UE doit garantir l'accès à une énergie financièrement abordable, p.ex. en garantissant des prix de marché compétitifs, en particulier afin de réduire le nombre de personnes dans l'incapacité de payer leurs factures d'énergie										The EU must ensure access to affordable energy, e.g. ensure competitive market prices, in particular to reduce the number of people unable to pay their energy bills
		UE28 EU28	UE28-UK EU28-UK	BE	BG	CZ	DK	D-W	DE	D-E	EE	IE	EL	ES	FR	HR	IT	CY	LV	LT	LU	HU	MT	NL	AT	PL	PT	RO	SI	SK	FI	SE	UK
	TOTAL	27438	26416	1028	1032	1008	1004	992	1537	545	1003	1006	1016	1005	1007	997	1023	503	1007	1003	514	1027	495	1014	1027	1010	1009	1041	1008	1081	1003	1008	1022
	Tout à fait d'accord	14911	14324	540	661	415	488	568	899	347	468	625	681	801	514	559	460	369	650	635	262	583	312	512	559	436	669	426	771	495	416	318	564
	Totally agree	0.54	0.54	0.52	0.64	0.41	0.49	0.57	0.58	0.64	0.47	0.62	0.67	0.8	0.51	0.56	0.45	0.73	0.65	0.63	0.51	0.57	0.63	0.51	0.55	0.43	0.66	0.41	0.77	0.46	0.42	0.32	0.55
	Plutôt d'accord	9581	9295	418	296	431	353	328	500	165	411	335	307	179	386	343	425	113	245	322	194	310	162	360	350	464	319	371	206	477	464	382	337
	Tend to agree	0.35	0.35	0.41	0.29	0.43	0.35	0.33	0.33	0.3	0.41	0.33	0.3	0.18	0.39	0.35	0.42	0.22	0.24	0.32	0.38	0.3	0.33	0.35	0.34	0.46	0.32	0.36	0.2	0.44	0.46	0.38	0.33
	Plutôt pas d'accord	1537	1592	57	25	102	91	58	83	18	57	24	18	9	33	51	98	8	34	19	27	102	1	92	85	55	2	162	20	50	82	170	26
	Tend to disagree	0.06	0.06	0.06	0.02	0.1	0.09	0.06	0.05	0.03	0.06	0.03	0.02	0.01	0.03	0.05	0.09	0.02	0.03	0.02	0.05	0.1	-	0.09	0.08	0.05	-	0.16	0.02	0.05	0.08	0.17	0.03
	Pas du tout d'accord	457	435	8	9	25	26	18	25	5	26	3	1	1	20	22	10	3	12	6	4	20	0	36	18	15	1	36	6	14	17	95	18
	Totally disagree	0.02	0.02	0.01	0.01	0.03	0.02	0.02	0.02	0.01	0.02	-	-	-	0.02	0.02	0.01	0.01	0.01	0.01	0.01	0.02	-	0.04	0.02	0.02	-	0.03	0.01	0.01	0.02	0.09	0.02
	NSP	952	769	5	41	34	46	20	30	9	41	19	10	16	53	21	30	10	66	21	27	11	19	14	14	40	19	46	5	46	24	44	76
	DK	0.03	0.03	-	0.04	0.03	0.05	0.02	0.02	0.02	0.04	0.02	0.01	0.01	0.05	0.02	0.03	0.02	0.07	0.02	0.05	0.01	0.04	0.01	0.01	0.04	0.02	0.04	-	0.04	0.02	0.04	0.07
	Total 'D'accord'	24492	23620	958	958	846	841	896	1399	512	879	959	987	980	900	902	885	481	895	957	456	894	474	872	909	900	987	797	977	972	880	700	901
	Total 'Agree'	0.89	0.89	0.93	0.93	0.84	0.84	0.9	0.91	0.94	0.88	0.95	0.97	0.98	0.9	0.91	0.87	0.95	0.89	0.95	0.89	0.87	0.96	0.86	0.89	0.89	0.98	0.77	0.97	0.9	0.88	0.7	0.88
	Total 'Pas d'accord'	1994	2027	65	33	127	116	76	108	24	83	28	19	9	54	73	108	11	46	25	31	122	2	128	104	70	3	198	26	64	99	265	44
	Total 'Disagree'	0.08	0.08	0.07	0.03	0.13	0.11	0.08	0.07	0.04	0.08	0.03	0.02	0.01	0.05	0.07	0.1	0.03	0.04	0.03	0.06	0.12	0	0.13	0.1	0.07	0	0.19	0.03	0.06	0.1	0.26	0.05

## Sheet: QB2.4
Index						Eurobarometer 91.4
		VOLUME A Pondéré Weighted										Terrain/Fieldwork : 09/05 - 25/05/2019
	QB2.4 Dans quelle mesure êtes-vous d'accord ou pas d'accord avec les propositions suivantes ?										QB2.4 To what extent do you agree or disagree with the following statements?
	La coopération entre les États membres de l'Union Européenne doit encore être renforcée, afin d'offrir à tous les Européens l'accès à une énergie sûre, financièrement abordable et propre										Cooperation between European Member States should be further strengthened to give all Europeans access to secure, financially affordable and clean energy
		UE28 EU28	UE28-UK EU28-UK	BE	BG	CZ	DK	D-W	DE	D-E	EE	IE	EL	ES	FR	HR	IT	CY	LV	LT	LU	HU	MT	NL	AT	PL	PT	RO	SI	SK	FI	SE	UK
	TOTAL	27438	26416	1028	1032	1008	1004	992	1537	545	1003	1006	1016	1005	1007	997	1023	503	1007	1003	514	1027	495	1014	1027	1010	1009	1041	1008	1081	1003	1008	1022
	Tout à fait d'accord	15407	14968	557	569	419	635	683	1048	357	539	598	621	776	535	520	447	359	599	659	300	565	299	636	506	428	626	414	755	489	544	636	536
	Totally agree	0.56	0.57	0.54	0.55	0.42	0.63	0.69	0.68	0.65	0.54	0.6	0.61	0.77	0.53	0.52	0.44	0.71	0.6	0.66	0.58	0.55	0.61	0.63	0.49	0.42	0.62	0.4	0.75	0.45	0.54	0.63	0.52
	Plutôt d'accord	9544	9232	422	373	459	283	277	435	162	378	344	347	195	382	379	426	117	296	314	170	348	168	326	405	482	346	402	223	489	417	267	344
	Tend to agree	0.35	0.35	0.41	0.36	0.46	0.28	0.28	0.28	0.3	0.38	0.34	0.34	0.19	0.38	0.38	0.42	0.23	0.29	0.31	0.33	0.34	0.34	0.32	0.39	0.48	0.34	0.39	0.22	0.45	0.42	0.27	0.34
	Plutôt pas d'accord	1180	1141	40	20	76	40	18	26	6	30	19	22	6	31	43	92	12	34	7	15	75	1	34	74	53	4	147	15	40	25	54	43
	Tend to disagree	0.04	0.04	0.04	0.02	0.07	0.04	0.02	0.02	0.01	0.03	0.02	0.02	0.01	0.03	0.04	0.09	0.03	0.03	0.01	0.03	0.07	-	0.03	0.07	0.05	0.01	0.14	0.01	0.04	0.03	0.05	0.04
	Pas du tout d'accord	342	299	6	10	19	17	8	10	1	11	4	3	1	10	26	15	5	12	0	4	28	2	16	25	12	0	32	9	13	4	30	21
	Totally disagree	0.01	0.01	0.01	0.01	0.02	0.02	0.01	0.01	-	0.01	-	0.01	-	0.01	0.03	0.01	0.01	0.01	-	0.01	0.03	-	0.02	0.03	0.01	-	0.03	0.01	0.01	-	0.03	0.02
	NSP	965	776	3	60	35	30	7	19	19	45	40	22	27	48	29	42	10	67	24	25	12	25	2	17	35	33	45	5	49	13	22	79
	DK	0.04	0.03	-	0.06	0.03	0.03	-	0.01	0.04	0.04	0.04	0.02	0.03	0.05	0.03	0.04	0.02	0.07	0.02	0.05	0.01	0.05	-	0.02	0.04	0.03	0.04	0.01	0.05	0.01	0.02	0.08
	Total 'D'accord'	24951	24200	979	942	878	918	960	1482	519	917	943	968	972	917	898	874	476	895	973	470	913	467	962	911	910	972	816	978	978	961	902	880
	Total 'Agree'	0.91	0.92	0.95	0.91	0.88	0.91	0.97	0.96	0.95	0.92	0.94	0.95	0.96	0.91	0.9	0.86	0.94	0.89	0.97	0.91	0.89	0.95	0.95	0.88	0.9	0.96	0.79	0.97	0.9	0.96	0.9	0.86
	Total 'Pas d'accord'	1522	1440	46	30	95	57	26	36	7	41	23	26	7	41	69	107	17	46	7	19	103	3	50	99	65	4	180	25	54	29	84	64
	Total 'Disagree'	0.05	0.05	0.05	0.03	0.09	0.06	0.03	0.03	0.01	0.04	0.02	0.03	0.01	0.04	0.07	0.1	0.04	0.04	0.01	0.04	0.1	0	0.05	0.1	0.06	0.01	0.17	0.02	0.05	0.03	0.08	0.06

## Sheet: QB3.1
Index						Eurobarometer 91.4
		VOLUME A Pondéré Weighted										Terrain/Fieldwork : 09/05 - 25/05/2019
	QB3.1 Dans quelle mesure êtes-vous d'accord ou pas d'accord avec les énoncés suivants ? Afin de garantir l'accès à une énergie sûre, il est nécessaire…										QB3.1 To what extent do you agree or disagree with the following statements? In order to ensure access to secure energy, it is necessary…
	De renforcer la coopération transfrontalière dans l'UE et la solidarité entre États membres en cas de crises énergétiques										To reinforce EU cooperation across borders and solidarity between Member States in the event of energy crises
		UE28 EU28	UE28-UK EU28-UK	BE	BG	CZ	DK	D-W	DE	D-E	EE	IE	EL	ES	FR	HR	IT	CY	LV	LT	LU	HU	MT	NL	AT	PL	PT	RO	SI	SK	FI	SE	UK
	TOTAL	27438	26416	1028	1032	1008	1004	992	1537	545	1003	1006	1016	1005	1007	997	1023	503	1007	1003	514	1027	495	1014	1027	1010	1009	1041	1008	1081	1003	1008	1022
	Tout à fait d'accord	13168	12843	446	514	384	601	581	896	311	502	554	540	646	439	479	372	365	600	636	262	457	304	528	453	394	481	372	698	455	501	628	444
	Totally agree	0.48	0.49	0.43	0.5	0.38	0.6	0.59	0.58	0.57	0.5	0.55	0.53	0.64	0.44	0.48	0.36	0.73	0.6	0.63	0.51	0.45	0.62	0.52	0.44	0.39	0.48	0.36	0.69	0.42	0.5	0.63	0.43
	Plutôt d'accord	10994	10605	504	374	478	302	369	567	196	403	355	413	268	431	404	486	117	286	318	199	424	159	376	457	494	469	382	265	500	421	304	404
	Tend to agree	0.4	0.4	0.49	0.36	0.47	0.3	0.37	0.37	0.36	0.4	0.35	0.41	0.27	0.43	0.41	0.47	0.23	0.28	0.32	0.39	0.41	0.32	0.37	0.45	0.49	0.46	0.37	0.26	0.46	0.42	0.3	0.4
	Plutôt pas d'accord	1349	1298	59	30	82	41	24	39	17	17	36	24	17	33	55	81	6	24	13	12	86	2	67	84	59	5	175	26	39	41	41	50
	Tend to disagree	0.05	0.05	0.06	0.03	0.08	0.04	0.02	0.03	0.03	0.02	0.04	0.02	0.02	0.03	0.05	0.08	0.01	0.02	0.01	0.02	0.08	-	0.07	0.08	0.06	0.01	0.17	0.03	0.04	0.04	0.04	0.05
	Pas du tout d'accord	388	335	8	10	19	15	4	6	0	8	2	1	2	9	24	27	2	7	1	4	33	0	23	12	20	1	35	6	11	3	13	25
	Totally disagree	0.01	0.01	0.01	0.01	0.02	0.02	0.01	-	-	0.01	-	-	-	0.01	0.02	0.03	-	0.01	-	0.01	0.03	-	0.02	0.01	0.02	-	0.03	0.01	0.01	-	0.01	0.02
	NSP	1539	1335	12	104	46	45	14	29	22	73	59	38	73	95	36	57	13	89	35	37	26	30	20	21	42	53	76	14	77	37	21	98
	DK	0.06	0.05	0.01	0.1	0.05	0.04	0.01	0.02	0.04	0.07	0.06	0.04	0.07	0.09	0.04	0.06	0.03	0.09	0.04	0.07	0.03	0.06	0.02	0.02	0.04	0.05	0.07	0.01	0.07	0.04	0.02	0.1
	Total 'D'accord'	24162	23448	950	888	862	903	950	1463	506	905	909	953	914	870	883	858	481	887	954	461	881	463	904	910	889	950	754	963	954	922	933	848
	Total 'Agree'	0.88	0.89	0.92	0.86	0.85	0.9	0.96	0.95	0.93	0.9	0.9	0.94	0.91	0.87	0.89	0.83	0.96	0.88	0.95	0.9	0.86	0.94	0.89	0.89	0.88	0.94	0.73	0.95	0.88	0.92	0.93	0.83
	Total 'Pas d'accord'	1737	1633	67	40	101	56	29	45	17	25	38	26	18	42	78	108	8	31	14	16	119	2	90	97	79	6	210	32	50	44	54	76
	Total 'Disagree'	0.06	0.06	0.07	0.04	0.1	0.06	0.03	0.03	0.03	0.03	0.04	0.02	0.02	0.04	0.07	0.11	0.01	0.03	0.01	0.03	0.11	0	0.09	0.09	0.08	0.01	0.2	0.04	0.05	0.04	0.05	0.07

## Sheet: QB3.2
Index						Eurobarometer 91.4
		VOLUME A Pondéré Weighted										Terrain/Fieldwork : 09/05 - 25/05/2019
	QB3.2 Dans quelle mesure êtes-vous d'accord ou pas d'accord avec les énoncés suivants ? Afin de garantir l'accès à une énergie sûre, il est nécessaire…										QB3.2 To what extent do you agree or disagree with the following statements? In order to ensure access to secure energy, it is necessary…
	Que l'UE diversifie ses fournisseurs externes d'énergie										For the EU to diversify its external energy suppliers
		UE28 EU28	UE28-UK EU28-UK	BE	BG	CZ	DK	D-W	DE	D-E	EE	IE	EL	ES	FR	HR	IT	CY	LV	LT	LU	HU	MT	NL	AT	PL	PT	RO	SI	SK	FI	SE	UK
	TOTAL	27438	26416	1028	1032	1008	1004	992	1537	545	1003	1006	1016	1005	1007	997	1023	503	1007	1003	514	1027	495	1014	1027	1010	1009	1041	1008	1081	1003	1008	1022
	Tout à fait d'accord	10207	9812	362	372	288	449	375	563	174	341	515	408	584	280	353	358	262	382	548	187	378	261	345	377	351	393	385	616	333	273	261	384
	Totally agree	0.37	0.37	0.35	0.36	0.29	0.45	0.38	0.37	0.32	0.34	0.51	0.4	0.58	0.28	0.35	0.35	0.52	0.38	0.55	0.36	0.37	0.53	0.34	0.37	0.35	0.39	0.37	0.61	0.31	0.27	0.26	0.38
	Plutôt d'accord	10914	10489	519	348	423	352	369	573	206	425	374	415	271	412	404	468	148	286	380	226	438	186	424	407	454	511	368	292	508	420	361	412
	Tend to agree	0.4	0.4	0.5	0.34	0.42	0.35	0.37	0.37	0.38	0.42	0.37	0.41	0.27	0.41	0.41	0.46	0.29	0.28	0.38	0.44	0.43	0.38	0.42	0.4	0.45	0.51	0.35	0.29	0.47	0.42	0.36	0.4
	Plutôt pas d'accord	2574	2607	104	39	123	90	92	144	53	53	38	69	28	133	78	103	29	51	21	34	118	2	154	138	85	23	189	62	51	200	201	60
	Tend to disagree	0.09	0.1	0.1	0.04	0.12	0.09	0.09	0.1	0.1	0.05	0.04	0.07	0.03	0.13	0.08	0.1	0.06	0.05	0.02	0.07	0.11	-	0.15	0.13	0.08	0.02	0.18	0.06	0.05	0.2	0.2	0.06
	Pas du tout d'accord	663	627	17	16	28	18	14	21	6	27	7	8	3	46	25	31	9	15	3	16	38	0	34	36	15	4	28	19	17	14	94	28
	Totally disagree	0.03	0.02	0.02	0.01	0.03	0.02	0.02	0.01	0.01	0.03	0.01	0.01	-	0.05	0.02	0.03	0.02	0.02	-	0.03	0.04	-	0.03	0.03	0.02	-	0.03	0.02	0.01	0.01	0.09	0.03
	NSP	3079	2881	26	256	146	94	142	235	106	157	73	115	118	136	136	62	55	272	52	50	56	46	56	69	105	78	71	18	172	96	91	138
	DK	0.11	0.11	0.03	0.25	0.14	0.09	0.14	0.15	0.19	0.16	0.07	0.11	0.12	0.13	0.14	0.06	0.11	0.27	0.05	0.1	0.05	0.09	0.06	0.07	0.1	0.08	0.07	0.02	0.16	0.1	0.09	0.13
	Total 'D'accord'	21121	20301	880	720	712	802	744	1137	380	766	889	823	855	692	758	827	410	669	928	414	815	446	770	784	805	904	753	909	840	692	623	796
	Total 'Agree'	0.77	0.77	0.85	0.7	0.71	0.8	0.75	0.74	0.7	0.76	0.88	0.81	0.85	0.69	0.76	0.81	0.81	0.66	0.93	0.8	0.8	0.91	0.76	0.77	0.8	0.9	0.72	0.9	0.78	0.69	0.62	0.78
	Total 'Pas d'accord'	3238	3234	121	56	151	108	106	165	59	80	45	78	31	179	103	134	38	66	24	51	156	3	188	174	100	27	217	81	68	214	295	88
	Total 'Disagree'	0.12	0.12	0.12	0.05	0.15	0.11	0.11	0.11	0.11	0.08	0.05	0.08	0.03	0.18	0.1	0.13	0.08	0.07	0.02	0.1	0.15	0	0.18	0.16	0.1	0.02	0.21	0.08	0.06	0.21	0.29	0.09

[truncated: 54 more sheets: QB3.3, QB3.4, QB3.5, QB3.6, QB3.7, QB4.1, QB4.2, QB4.3, QB4.4, QB4.5, QB5.1, QB5.2, QB5.3, QB5.4, QB6, QB7, QB8, QB9, D1.1, D1.2 …]
