# Supplementary material for: Considering justice as a planning principle helps navigate a diversity of future energy infrastructure designs
Source: Research Square preprint supplement (doi:10.21203/rs.3.rs-4256136/v1), 2024-12-18
Supplement: Supplementary file 3 [file fl_514_volume_A.xlsx]

## Sheet: Table of Contents
Flash Eurobarometer 514
EU’s response to the energy challenges
Fieldwork: 23/11-30/11/2022
VOLUME A (Weighted)
	Table Names
Q1_1	Q1_1 How often do you follow news related to the war in Ukraine?
Q1_2	Q1_2 How often do you discuss the war in Ukraine with friends and relatives?
Q2_1	Q2_1 How satisfied or dissatisfied are you with the way the following have reacted to the war in Ukraine? (NATIONALITY) authorities
Q2_2	Q2_2 How satisfied or dissatisfied are you with the way the following have reacted to the war in Ukraine? The European Union
Q2_3	Q2_3 How satisfied or dissatisfied are you with the way the following have reacted to the war in Ukraine? NATO
Q2_4	Q2_4 How satisfied or dissatisfied are you with the way the following have reacted to the war in Ukraine? Citizens in (OUR COUNTRY)
Q3_1	Q3_1 For each of the following measures that have been announced, please tell me if you approve of them or not. Economic sanctions against the Russian government, companies and individuals
Q3_2	Q3_2 For each of the following measures that have been announced, please tell me if you approve of them or not. Financial support to Ukraine
Q3_3	Q3_3 For each of the following measures that have been announced, please tell me if you approve of them or not. Financing the purchase and supply of military equipment to Ukraine
Q3_4	Q3_4 For each of the following measures that have been announced, please tell me if you approve of them or not. Providing humanitarian support to the people affected by the war
Q3_5	Q3_5 For each of the following measures that have been announced, please tell me if you approve of them or not. Banning state-owned Russian media (such as Russia Today and Sputnik) from broadcasting in the EU
Q3_6	Q3_6 For each of the following measures that have been announced, please tell me if you approve of them or not. Welcoming in the European Union people fleeing the war
Q4	Q4 Which of these three statements comes closest to your view?
Q5_1	Q5_1 How would you judge the current state of each of the following? The economic situation of (OUR COUNTRY)
Q5_2	Q5_2 How would you judge the current state of each of the following? The economic situation of the European Union
Q5_3	Q5_3 How would you judge the current state of each of the following? Your personal standard of living
Q6_1	Q6_1 How much do you agree or disagree with each of the following statements? The EU should continue to take actions to reduce its dependency on Russian gas and oil as soon as possible
Q6_2	Q6_2 How much do you agree or disagree with each of the following statements? Rising energy prices have a significant impact on my purchasing power
Q6_3	Q6_3 How much do you agree or disagree with each of the following statements? Recent price increases in (OUR COUNTRY) are mainly due to Russia’s aggressive behaviour
Q7_1	Q7_1 And how much do you agree or disagree with each of the following statements? The war in Ukraine makes it more urgent for EU Member States to invest in renewable energy
Q7_2	Q7_2 And how much do you agree or disagree with each of the following statements? The war in Ukraine makes it more urgent for EU Member States to invest in nuclear energy
Q7_3	Q7_3 And how much do you agree or disagree with each of the following statements? The price of electricity should not depend on the price of gas
Q7_4	Q7_4 And how much do you agree or disagree with each of the following statements? It is crucial for the EU to protect critical infrastructures such as pipelines and internet cables
Q7_5	Q7_5 And how much do you agree or disagree with each of the following statements? We should all make an effort to reduce energy consumption during peak hours
Q8_1	Q8_1 What impact do you think the following measures taken to improve the overall economic situation will have? Measures taken by the (NATIONALITY) government
Q8_2	Q8_2 What impact do you think the following measures taken to improve the overall economic situation will have? Measures taken by the European Union
Q9	Q9 And you, personally, what kind of action(s) are you already taking or would you be ready to take to cut down on your energy consumption and your energy bills? [MULTIPLE ANSWERS]
Q10_1	Q10_1 How much do you agree or disagree with each of the following statements? Overall, there is solidarity among Member States in the EU
Q10_2	Q10_2 How much do you agree or disagree with each of the following statements? Democracy is under threat in the EU
Q10_3	Q10_3 How much do you agree or disagree with each of the following statements? Democracy is under threat in (OUR COUNTRY)
DX1	DX1 Do you own or rent the accommodation you currently live in as your main residence?
DX2	DX2 During the last twelve months, would you say you had difficulties paying your bills at the end of the month…?
DX3	DX3 Do you think that in the next twelve months, prices in general will…?
D1r1	D1r1 How old are you? 4 categories
D1r2	D1r2 How old are you? 6 categories
D2	D2 Which of the following describes how you think of yourself?
D3	D3 What is your nationality? Please tell me the country(ies) that applies(y).
D4r1	D4r1 How old were you when you stopped full-time education?
D4r2	D4r2 How old were you when you stopped full-time education?
D5	D5 As far as your current occupation is concerned, would you say you are…?
D5r	D5r As far as your current occupation is concerned, would you say you are…?
D13	D13 Would you say you live in a...?
D22	D22 How many people aged 15 years or more live in your household, yourself included?
D23	D23 How many children under the age of 15 are living in your household?
D25	D25 Device used to complete the survey

## Sheet: Note
Significance testing Survey results are subject to sampling tolerances meaning that not all differences can be considered statistically significant. Statistical significance testing needs to be performed to assess whether differences in survey results between countries and socio-demographic categories (or waves, in case of a trend survey) are due to chance or whether they represent meaningful dif…

## Sheet: Q1_1
Home
Flash Eurobarometer 514
EU’s response to the energy challenges
Fieldwork: 23/11-30/11/2022
VOLUME A (Weighted)
Q1_1 How often do you follow news related to the war in Ukraine?
Base: All
		Country	Country	Country	Country	Country	Country	Country	Country	Country	Country	Country	Country	Country	Country	Country	Country	Country	Country	Country	Country	Country	Country	Country	Country	Country	Country	Country
	EU27	BE	BG	CZ	DK	DE	EE	IE	EL	ES	FR	HR	IT	CY	LV	LT	LU	HU	MT	NL	AT	PL	PT	RO	SI	SK	FI	SE
		(AA)	(AB)	(AC)	(AD)	(AE)	(AF)	(AG)	(AH)	(AI)	(AJ)	(AK)	(AL)	(AM)	(AN)	(AO)	(AP)	(AQ)	(AR)	(AS)	(AT)	(AU)	(AV)	(AW)	(AX)	(AY)	(AZ)	(BA)
Base: Total	26337	1047	1010	1050	1037	1028	1061	1091	1011	1005	1034	1042	1019	502	1050	1035	502	1036	552	1007	1022	1017	1047	1035	1039	1005	1052	1001
Base: Weighted Total	26337	1047	1010	1050	1037	1028	1061	1091	1011	1005	1034	1042	1019	502	1050	1035	502	1036	552	1007	1022	1017	1047	1035	1039	1005	1052	1001
Several times a day	6050	122	238	214	217	230	331	182	167	208	159	240	320	104	323	378	95	225	92	180	153	277	366	342	137	171	369	267
	23	11.7	23.6	20.4	21	22.4	31.2	16.7	16.5	20.7	15.3	23	31.4	20.6	30.7	36.5	19	21.7	16.7	17.9	15	27.2	34.9	33	13.2	17.1	35.1	26.7
			(AA) (AG) (AH) (AJ) (AR) (AS) (AT) (AX) (AY)	(AA) (AG) (AH) (AJ) (AT) (AX)	(AA) (AG) (AH) (AJ) (AT) (AX) (AY)	(AA) (AG) (AH) (AJ) (AR) (AS) (AT) (AX) (AY)	(AA) (AB) (AC) (AD) (AE) (AG) (AH) (AI) (AJ) (AK) (AM) (AP) (AQ) (AR) (AS) (AT) (AX) (AY) (BA)	(AA) (AX)	(AA)	(AA) (AG) (AH) (AJ) (AT) (AX)	(AA)	(AA) (AG) (AH) (AJ) (AR) (AS) (AT) (AX) (AY)	(AA) (AB) (AC) (AD) (AE) (AG) (AH) (AI) (AJ) (AK) (AM) (AP) (AQ) (AR) (AS) (AT) (AX) (AY) (BA)	(AA) (AJ) (AT) (AX)	(AA) (AB) (AC) (AD) (AE) (AG) (AH) (AI) (AJ) (AK) (AM) (AP) (AQ) (AR) (AS) (AT) (AX) (AY)	(AA) (AB) (AC) (AD) (AE) (AF) (AG) (AH) (AI) (AJ) (AK) (AL) (AM) (AN) (AP) (AQ) (AR) (AS) (AT) (AU) (AX) (AY) (BA)	(AA) (AX)	(AA) (AG) (AH) (AJ) (AR) (AS) (AT) (AX) (AY)	(AA)	(AA) (AX)	(AA)	(AA) (AC) (AD) (AE) (AG) (AH) (AI) (AJ) (AK) (AM) (AP) (AQ) (AR) (AS) (AT) (AX) (AY)	(AA) (AB) (AC) (AD) (AE) (AG) (AH) (AI) (AJ) (AK) (AM) (AP) (AQ) (AR) (AS) (AT) (AU) (AX) (AY) (BA)	(AA) (AB) (AC) (AD) (AE) (AG) (AH) (AI) (AJ) (AK) (AM) (AP) (AQ) (AR) (AS) (AT) (AU) (AX) (AY) (BA)		(AA) (AX)	(AA) (AB) (AC) (AD) (AE) (AG) (AH) (AI) (AJ) (AK) (AM) (AN) (AP) (AQ) (AR) (AS) (AT) (AU) (AX) (AY) (BA)	(AA) (AC) (AD) (AE) (AG) (AH) (AI) (AJ) (AM) (AP) (AQ) (AR) (AS) (AT) (AX) (AY)
Once a day	7545	270	330	254	247	325	307	297	244	310	302	293	301	108	300	312	146	234	94	272	257	300	266	240	215	240	310	248
	28.6	25.8	32.7	24.2	23.8	31.6	28.9	27.2	24.2	30.8	29.2	28.1	29.6	21.5	28.6	30.1	29.1	22.6	17.1	27.1	25.1	29.5	25.4	23.2	20.7	23.8	29.5	24.7
		(AR) (AX)	(AA) (AC) (AD) (AG) (AH) (AM) (AQ) (AR) (AS) (AT) (AV) (AW) (AX) (AY) (BA)	(AR)	(AR)	(AA) (AC) (AD) (AG) (AH) (AM) (AQ) (AR) (AS) (AT) (AV) (AW) (AX) (AY) (BA)	(AC) (AD) (AH) (AM) (AQ) (AR) (AW) (AX) (AY) (BA)	(AM) (AQ) (AR) (AX)	(AR)	(AA) (AC) (AD) (AH) (AM) (AQ) (AR) (AT) (AV) (AW) (AX) (AY) (BA)	(AC) (AD) (AH) (AM) (AQ) (AR) (AT) (AW) (AX) (AY) (BA)	(AD) (AM) (AQ) (AR) (AW) (AX) (AY)	(AC) (AD) (AH) (AM) (AQ) (AR) (AT) (AW) (AX) (AY) (BA)		(AC) (AD) (AH) (AM) (AQ) (AR) (AW) (AX) (AY)	(AA) (AC) (AD) (AH) (AM) (AQ) (AR) (AT) (AV) (AW) (AX) (AY) (BA)	(AD) (AM) (AQ) (AR) (AW) (AX) (AY)	(AR)		(AM) (AQ) (AR) (AX)	(AR) (AX)	(AC) (AD) (AH) (AM) (AQ) (AR) (AT) (AW) (AX) (AY) (BA)	(AR) (AX)	(AR)		(AR)	(AC) (AD) (AH) (AM) (AQ) (AR) (AT) (AW) (AX) (AY) (BA)	(AR) (AX)
Several times a week	7147	330	224	261	323	279	198	299	222	289	323	257	235	125	217	214	143	287	181	339	310	268	253	241	295	230	231	302
	27.1	31.6	22.2	24.9	31.2	27.1	18.7	27.4	21.9	28.7	31.2	24.7	23.1	24.9	20.7	20.7	28.6	27.7	32.8	33.6	30.3	26.4	24.2	23.2	28.4	22.8	22	30.1
		(AB) (AC) (AE) (AF) (AG) (AH) (AK) (AL) (AM) (AN) (AO) (AU) (AV) (AW) (AY) (AZ)		(AF) (AN) (AO)	(AB) (AC) (AE) (AF) (AH) (AK) (AL) (AM) (AN) (AO) (AU) (AV) (AW) (AY) (AZ)	(AB) (AF) (AH) (AL) (AN) (AO) (AY) (AZ)		(AB) (AF) (AH) (AL) (AN) (AO) (AW) (AY) (AZ)		(AB) (AF) (AH) (AL) (AN) (AO) (AV) (AW) (AY) (AZ)	(AB) (AC) (AE) (AF) (AH) (AK) (AL) (AM) (AN) (AO) (AU) (AV) (AW) (AY) (AZ)	(AF) (AN)	(AF)	(AF)			(AB) (AF) (AH) (AL) (AN) (AO) (AW) (AY) (AZ)	(AB) (AF) (AH) (AL) (AN) (AO) (AW) (AY) (AZ)	(AB) (AC) (AE) (AF) (AG) (AH) (AK) (AL) (AM) (AN) (AO) (AU) (AV) (AW) (AY) (AZ)	(AB) (AC) (AE) (AF) (AG) (AH) (AI) (AK) (AL) (AM) (AN) (AO) (AQ) (AU) (AV) (AW) (AX) (AY) (AZ)	(AB) (AC) (AF) (AH) (AK) (AL) (AM) (AN) (AO) (AV) (AW) (AY) (AZ)	(AF) (AH) (AN) (AO) (AZ)	(AF)	(AF)	(AB) (AF) (AH) (AL) (AN) (AO) (AV) (AW) (AY) (AZ)	(AF)		(AB) (AC) (AF) (AH) (AK) (AL) (AM) (AN) (AO) (AV) (AW) (AY) (AZ)
Less often	4664	260	187	260	227	157	189	246	292	172	197	215	141	141	184	107	102	253	159	179	256	152	150	186	327	267	137	172
	17.7	24.9	18.5	24.8	21.9	15.3	17.8	22.6	28.9	17.1	19	20.6	13.8	28	17.5	10.4	20.3	24.4	28.7	17.8	25	15	14.3	18	31.4	26.5	13	17.1
		(AB) (AE) (AF) (AI) (AJ) (AK) (AL) (AN) (AO) (AS) (AU) (AV) (AW) (AZ) (BA)	(AL) (AO) (AV) (AZ)	(AB) (AE) (AF) (AI) (AJ) (AK) (AL) (AN) (AO) (AS) (AU) (AV) (AW) (AZ) (BA)	(AE) (AF) (AI) (AL) (AN) (AO) (AS) (AU) (AV) (AW) (AZ) (BA)	(AO)	(AL) (AO) (AV) (AZ)	(AB) (AE) (AF) (AI) (AL) (AN) (AO) (AS) (AU) (AV) (AW) (AZ) (BA)	(AB) (AC) (AD) (AE) (AF) (AG) (AI) (AJ) (AK) (AL) (AN) (AO) (AP) (AQ) (AS) (AU) (AV) (AW) (AZ) (BA)	(AO) (AZ)	(AE) (AL) (AO) (AU) (AV) (AZ)	(AE) (AL) (AO) (AU) (AV) (AZ)	(AO)	(AB) (AD) (AE) (AF) (AG) (AI) (AJ) (AK) (AL) (AN) (AO) (AP) (AS) (AU) (AV) (AW) (AZ) (BA)	(AL) (AO) (AZ)		(AE) (AL) (AO) (AU) (AV) (AZ)	(AB) (AE) (AF) (AI) (AJ) (AL) (AN) (AO) (AS) (AU) (AV) (AW) (AZ) (BA)	(AB) (AD) (AE) (AF) (AG) (AI) (AJ) (AK) (AL) (AN) (AO) (AP) (AS) (AU) (AV) (AW) (AZ) (BA)	(AL) (AO) (AV) (AZ)	(AB) (AE) (AF) (AI) (AJ) (AK) (AL) (AN) (AO) (AS) (AU) (AV) (AW) (AZ) (BA)	(AO)	(AO)	(AL) (AO) (AV) (AZ)	(AA) (AB) (AC) (AD) (AE) (AF) (AG) (AI) (AJ) (AK) (AL) (AN) (AO) (AP) (AQ) (AS) (AT) (AU) (AV) (AW) (AY) (AZ) (BA)	(AB) (AD) (AE) (AF) (AI) (AJ) (AK) (AL) (AN) (AO) (AP) (AS) (AU) (AV) (AW) (AZ) (BA)		(AL) (AO) (AZ)
Never	930	64	31	60	23	36	36	67	86	27	54	37	22	25	26	23	15	38	26	37	46	20	12	26	65	98	5	13
	3.5	6.2	3.1	5.7	2.2	3.5	3.4	6.1	8.5	2.7	5.2	3.6	2.2	5	2.5	2.3	3.1	3.7	4.7	3.7	4.5	1.9	1.2	2.5	6.3	9.7	0.5	1.3
		(AB) (AD) (AE) (AF) (AI) (AK) (AL) (AN) (AO) (AP) (AQ) (AS) (AU) (AV) (AW) (AZ) (BA)	(AV) (AZ) (BA)	(AB) (AD) (AE) (AF) (AI) (AK) (AL) (AN) (AO) (AP) (AQ) (AS) (AU) (AV) (AW) (AZ) (BA)	(AZ)	(AU) (AV) (AZ) (BA)	(AV) (AZ) (BA)	(AB) (AD) (AE) (AF) (AI) (AK) (AL) (AN) (AO) (AP) (AQ) (AS) (AU) (AV) (AW) (AZ) (BA)	(AB) (AC) (AD) (AE) (AF) (AI) (AJ) (AK) (AL) (AM) (AN) (AO) (AP) (AQ) (AR) (AS) (AT) (AU) (AV) (AW) (AZ) (BA)	(AV) (AZ) (BA)	(AB) (AD) (AF) (AI) (AL) (AN) (AO) (AU) (AV) (AW) (AZ) (BA)	(AU) (AV) (AZ) (BA)	(AZ)	(AD) (AI) (AL) (AN) (AO) (AU) (AV) (AW) (AZ) (BA)	(AV) (AZ)	(AZ)	(AV) (AZ) (BA)	(AD) (AU) (AV) (AZ) (BA)	(AD) (AL) (AN) (AO) (AU) (AV) (AW) (AZ) (BA)	(AU) (AV) (AZ) (BA)	(AD) (AI) (AL) (AN) (AO) (AU) (AV) (AW) (AZ) (BA)	(AZ)		(AV) (AZ)	(AB) (AD) (AE) (AF) (AI) (AK) (AL) (AN) (AO) (AP) (AQ) (AS) (AU) (AV) (AW) (AZ) (BA)	(AA) (AB) (AC) (AD) (AE) (AF) (AG) (AI) (AJ) (AK) (AL) (AM) (AN) (AO) (AP) (AQ) (AR) (AS) (AT) (AU) (AV) (AW) (AX) (AZ) (BA)		(AZ)

## Sheet: Q1_2
Home
Flash Eurobarometer 514
EU’s response to the energy challenges
Fieldwork: 23/11-30/11/2022
VOLUME A (Weighted)
Q1_2 How often do you discuss the war in Ukraine with friends and relatives?
Base: All
		Country	Country	Country	Country	Country	Country	Country	Country	Country	Country	Country	Country	Country	Country	Country	Country	Country	Country	Country	Country	Country	Country	Country	Country	Country	Country	Country
	EU27	BE	BG	CZ	DK	DE	EE	IE	EL	ES	FR	HR	IT	CY	LV	LT	LU	HU	MT	NL	AT	PL	PT	RO	SI	SK	FI	SE
		(AA)	(AB)	(AC)	(AD)	(AE)	(AF)	(AG)	(AH)	(AI)	(AJ)	(AK)	(AL)	(AM)	(AN)	(AO)	(AP)	(AQ)	(AR)	(AS)	(AT)	(AU)	(AV)	(AW)	(AX)	(AY)	(AZ)	(BA)
Base: Total	26337	1047	1010	1050	1037	1028	1061	1091	1011	1005	1034	1042	1019	502	1050	1035	502	1036	552	1007	1022	1017	1047	1035	1039	1005	1052	1001
Base: Weighted Total	26337	1047	1010	1050	1037	1028	1061	1091	1011	1005	1034	1042	1019	502	1050	1035	502	1036	552	1007	1022	1017	1047	1035	1039	1005	1052	1001
Several times a day	2475	36	106	98	62	100	86	67	97	99	53	70	136	37	124	130	25	68	34	38	59	105	157	202	53	71	83	81
	9.4	3.4	10.5	9.3	5.9	9.8	8.1	6.2	9.6	9.9	5.1	6.7	13.3	7.4	11.8	12.5	5	6.5	6.1	3.8	5.8	10.3	15	19.5	5.1	7.1	7.8	8.1
			(AA) (AD) (AG) (AJ) (AK) (AP) (AQ) (AR) (AS) (AT) (AX) (AY)	(AA) (AD) (AG) (AJ) (AK) (AP) (AQ) (AR) (AS) (AT) (AX)	(AA) (AS)	(AA) (AD) (AG) (AJ) (AK) (AP) (AQ) (AR) (AS) (AT) (AX) (AY)	(AA) (AJ) (AP) (AS) (AX)	(AA) (AS)	(AA) (AD) (AG) (AJ) (AK) (AP) (AQ) (AR) (AS) (AT) (AX)	(AA) (AD) (AG) (AJ) (AK) (AP) (AQ) (AR) (AS) (AT) (AX) (AY)		(AA) (AS)	(AA) (AC) (AD) (AE) (AF) (AG) (AH) (AI) (AJ) (AK) (AM) (AP) (AQ) (AR) (AS) (AT) (AU) (AX) (AY) (AZ) (BA)	(AA) (AS)	(AA) (AD) (AF) (AG) (AJ) (AK) (AM) (AP) (AQ) (AR) (AS) (AT) (AX) (AY) (AZ) (BA)	(AA) (AC) (AD) (AF) (AG) (AJ) (AK) (AM) (AP) (AQ) (AR) (AS) (AT) (AX) (AY) (AZ) (BA)		(AA) (AS)	(AA)		(AA) (AS)	(AA) (AD) (AG) (AJ) (AK) (AP) (AQ) (AR) (AS) (AT) (AX) (AY)	(AA) (AB) (AC) (AD) (AE) (AF) (AG) (AH) (AI) (AJ) (AK) (AM) (AP) (AQ) (AR) (AS) (AT) (AU) (AX) (AY) (AZ) (BA)	(AA) (AB) (AC) (AD) (AE) (AF) (AG) (AH) (AI) (AJ) (AK) (AL) (AM) (AN) (AO) (AP) (AQ) (AR) (AS) (AT) (AU) (AV) (AX) (AY) (AZ) (BA)		(AA) (AS)	(AA) (AJ) (AS) (AX)	(AA) (AJ) (AP) (AS) (AT) (AX)
Once a day	3206	83	198	124	93	121	150	137	85	107	112	118	161	38	165	235	48	103	29	85	97	160	107	146	85	97	136	107
	12.2	8	19.6	11.8	8.9	11.8	14.2	12.5	8.4	10.7	10.8	11.3	15.8	7.6	15.7	22.7	9.6	9.9	5.2	8.5	9.5	15.8	10.3	14.1	8.2	9.7	12.9	10.7
			(AA) (AC) (AD) (AE) (AF) (AG) (AH) (AI) (AJ) (AK) (AM) (AP) (AQ) (AR) (AS) (AT) (AU) (AV) (AW) (AX) (AY) (AZ) (BA)	(AA) (AD) (AH) (AM) (AR) (AS) (AX)	(AR)	(AA) (AD) (AH) (AM) (AR) (AS) (AX)	(AA) (AD) (AH) (AI) (AJ) (AM) (AP) (AQ) (AR) (AS) (AT) (AV) (AX) (AY) (BA)	(AA) (AD) (AH) (AM) (AR) (AS) (AT) (AX)	(AR)	(AA) (AR)	(AA) (AR)	(AA) (AH) (AM) (AR) (AS) (AX)	(AA) (AC) (AD) (AE) (AG) (AH) (AI) (AJ) (AK) (AM) (AP) (AQ) (AR) (AS) (AT) (AV) (AX) (AY) (BA)		(AA) (AC) (AD) (AE) (AH) (AI) (AJ) (AK) (AM) (AP) (AQ) (AR) (AS) (AT) (AV) (AX) (AY) (BA)	(AA) (AC) (AD) (AE) (AF) (AG) (AH) (AI) (AJ) (AK) (AL) (AM) (AN) (AP) (AQ) (AR) (AS) (AT) (AU) (AV) (AW) (AX) (AY) (AZ) (BA)	(AR)	(AR)		(AR)	(AR)	(AA) (AC) (AD) (AE) (AG) (AH) (AI) (AJ) (AK) (AM) (AP) (AQ) (AR) (AS) (AT) (AV) (AX) (AY) (BA)	(AR)	(AA) (AD) (AH) (AI) (AJ) (AM) (AP) (AQ) (AR) (AS) (AT) (AV) (AX) (AY) (BA)		(AR)	(AA) (AD) (AH) (AM) (AQ) (AR) (AS) (AT) (AX) (AY)	(AA) (AR)
Several times a week	9282	283	314	354	360	392	380	388	293	392	324	389	364	143	337	377	197	298	183	288	348	414	381	331	298	303	414	411
	35.2	27	31	33.7	34.7	38.1	35.9	35.5	29	39	31.4	37.3	35.7	28.5	32.1	36.4	39.2	28.8	33.2	28.6	34	40.7	36.4	32	28.7	30.2	39.3	41
				(AA) (AH) (AM) (AQ) (AS) (AX)	(AA) (AH) (AM) (AQ) (AS) (AX) (AY)	(AA) (AB) (AC) (AH) (AJ) (AM) (AN) (AQ) (AS) (AW) (AX) (AY)	(AA) (AB) (AH) (AJ) (AM) (AQ) (AS) (AX) (AY)	(AA) (AH) (AM) (AQ) (AS) (AX) (AY)		(AA) (AB) (AC) (AH) (AJ) (AM) (AN) (AQ) (AR) (AS) (AT) (AW) (AX) (AY)	(AA)	(AA) (AB) (AH) (AJ) (AM) (AN) (AQ) (AS) (AW) (AX) (AY)	(AA) (AH) (AJ) (AM) (AQ) (AS) (AX) (AY)		(AA)	(AA) (AB) (AH) (AJ) (AM) (AQ) (AS) (AX) (AY)	(AA) (AB) (AC) (AH) (AJ) (AM) (AN) (AQ) (AS) (AW) (AX) (AY)		(AA)		(AA) (AH) (AM) (AQ) (AS) (AX)	(AA) (AB) (AC) (AD) (AF) (AG) (AH) (AJ) (AL) (AM) (AN) (AQ) (AR) (AS) (AT) (AW) (AX) (AY)	(AA) (AB) (AH) (AJ) (AM) (AQ) (AS) (AX) (AY)	(AA)			(AA) (AB) (AC) (AD) (AH) (AJ) (AM) (AN) (AQ) (AR) (AS) (AT) (AW) (AX) (AY)	(AA) (AB) (AC) (AD) (AF) (AG) (AH) (AJ) (AL) (AM) (AN) (AQ) (AR) (AS) (AT) (AV) (AW) (AX) (AY)
Less often	9798	521	354	392	469	366	382	419	445	344	444	410	319	255	371	255	207	459	271	522	471	305	349	320	520	415	392	365
	37.2	49.7	35	37.3	45.2	35.6	36	38.4	44	34.2	43	39.4	31.3	50.8	35.3	24.6	41.2	44.3	49	51.8	46.1	30	33.3	30.9	50	41.3	37.3	36.4
		(AB) (AC) (AD) (AE) (AF) (AG) (AH) (AI) (AJ) (AK) (AL) (AN) (AO) (AP) (AQ) (AU) (AV) (AW) (AY) (AZ) (BA)	(AO) (AU)	(AL) (AO) (AU) (AW)	(AB) (AC) (AE) (AF) (AG) (AI) (AK) (AL) (AN) (AO) (AU) (AV) (AW) (AZ) (BA)	(AO) (AU) (AW)	(AL) (AO) (AU) (AW)	(AL) (AO) (AU) (AV) (AW)	(AB) (AC) (AE) (AF) (AG) (AI) (AL) (AN) (AO) (AU) (AV) (AW) (AZ) (BA)	(AO)	(AB) (AC) (AE) (AF) (AG) (AI) (AL) (AN) (AO) (AU) (AV) (AW) (AZ) (BA)	(AI) (AL) (AO) (AU) (AV) (AW)	(AO)	(AB) (AC) (AD) (AE) (AF) (AG) (AH) (AI) (AJ) (AK) (AL) (AN) (AO) (AP) (AQ) (AU) (AV) (AW) (AY) (AZ) (BA)	(AO) (AU)		(AB) (AE) (AI) (AL) (AN) (AO) (AU) (AV) (AW)	(AB) (AC) (AE) (AF) (AG) (AI) (AK) (AL) (AN) (AO) (AU) (AV) (AW) (AZ) (BA)	(AB) (AC) (AE) (AF) (AG) (AI) (AJ) (AK) (AL) (AN) (AO) (AP) (AU) (AV) (AW) (AY) (AZ) (BA)	(AB) (AC) (AD) (AE) (AF) (AG) (AH) (AI) (AJ) (AK) (AL) (AN) (AO) (AP) (AQ) (AT) (AU) (AV) (AW) (AY) (AZ) (BA)	(AB) (AC) (AE) (AF) (AG) (AI) (AK) (AL) (AN) (AO) (AU) (AV) (AW) (AY) (AZ) (BA)	(AO)	(AO)	(AO)	(AB) (AC) (AD) (AE) (AF) (AG) (AH) (AI) (AJ) (AK) (AL) (AN) (AO) (AP) (AQ) (AU) (AV) (AW) (AY) (AZ) (BA)	(AB) (AE) (AF) (AI) (AL) (AN) (AO) (AU) (AV) (AW) (BA)	(AL) (AO) (AU) (AW)	(AL) (AO) (AU) (AW)
Never	1577	124	39	82	54	49	63	80	91	62	101	55	39	29	52	39	25	108	36	74	47	32	52	36	83	118	28	38
	6	11.9	3.8	7.8	5.2	4.8	5.9	7.3	9	6.2	9.8	5.3	3.8	5.7	5	3.7	5	10.4	6.5	7.3	4.6	3.2	5	3.4	7.9	11.8	2.6	3.7
		(AB) (AC) (AD) (AE) (AF) (AG) (AH) (AI) (AK) (AL) (AM) (AN) (AO) (AP) (AR) (AS) (AT) (AU) (AV) (AW) (AX) (AZ) (BA)		(AB) (AD) (AE) (AK) (AL) (AN) (AO) (AP) (AT) (AU) (AV) (AW) (AZ) (BA)	(AU) (AZ)	(AZ)	(AL) (AO) (AU) (AW) (AZ) (BA)	(AB) (AE) (AL) (AN) (AO) (AT) (AU) (AV) (AW) (AZ) (BA)	(AB) (AD) (AE) (AF) (AI) (AK) (AL) (AM) (AN) (AO) (AP) (AT) (AU) (AV) (AW) (AZ) (BA)	(AB) (AL) (AO) (AU) (AW) (AZ) (BA)	(AB) (AD) (AE) (AF) (AI) (AK) (AL) (AM) (AN) (AO) (AP) (AR) (AT) (AU) (AV) (AW) (AZ) (BA)	(AU) (AZ)		(AU) (AZ)	(AZ)		(AZ)	(AB) (AC) (AD) (AE) (AF) (AG) (AI) (AK) (AL) (AM) (AN) (AO) (AP) (AR) (AS) (AT) (AU) (AV) (AW) (AZ) (BA)	(AB) (AL) (AO) (AU) (AW) (AZ) (BA)	(AB) (AE) (AL) (AN) (AO) (AT) (AU) (AV) (AW) (AZ) (BA)	(AZ)		(AZ)		(AB) (AD) (AE) (AK) (AL) (AN) (AO) (AP) (AT) (AU) (AV) (AW) (AZ) (BA)	(AB) (AC) (AD) (AE) (AF) (AG) (AI) (AK) (AL) (AM) (AN) (AO) (AP) (AR) (AS) (AT) (AU) (AV) (AW) (AX) (AZ) (BA)

## Sheet: Q2_1
Home
Flash Eurobarometer 514
EU’s response to the energy challenges
Fieldwork: 23/11-30/11/2022
VOLUME A (Weighted)
Q2_1 How satisfied or dissatisfied are you with the way the following have reacted to the war in Ukraine? (NATIONALITY) authorities
Base: All
		Country	Country	Country	Country	Country	Country	Country	Country	Country	Country	Country	Country	Country	Country	Country	Country	Country	Country	Country	Country	Country	Country	Country	Country	Country	Country	Country
	EU27	BE	BG	CZ	DK	DE	EE	IE	EL	ES	FR	HR	IT	CY	LV	LT	LU	HU	MT	NL	AT	PL	PT	RO	SI	SK	FI	SE
		(AA)	(AB)	(AC)	(AD)	(AE)	(AF)	(AG)	(AH)	(AI)	(AJ)	(AK)	(AL)	(AM)	(AN)	(AO)	(AP)	(AQ)	(AR)	(AS)	(AT)	(AU)	(AV)	(AW)	(AX)	(AY)	(AZ)	(BA)
Base: Total	26337	1047	1010	1050	1037	1028	1061	1091	1011	1005	1034	1042	1019	502	1050	1035	502	1036	552	1007	1022	1017	1047	1035	1039	1005	1052	1001
Base: Weighted Total	26337	1047	1010	1050	1037	1028	1061	1091	1011	1005	1034	1042	1019	502	1050	1035	502	1036	552	1007	1022	1017	1047	1035	1039	1005	1052	1001
Very satisfied	2090	36	32	92	174	54	133	153	125	54	76	43	64	54	154	157	65	116	53	74	54	146	71	148	51	54	183	98
	7.9	3.5	3.2	8.7	16.8	5.2	12.5	14.1	12.4	5.4	7.4	4.1	6.3	10.9	14.6	15.1	13	11.2	9.5	7.3	5.3	14.4	6.8	14.3	4.9	5.4	17.4	9.8
				(AA) (AB) (AE) (AI) (AK) (AL) (AT) (AX) (AY)	(AA) (AB) (AC) (AE) (AF) (AH) (AI) (AJ) (AK) (AL) (AM) (AQ) (AR) (AS) (AT) (AV) (AX) (AY) (BA)	(AB)	(AA) (AB) (AC) (AE) (AI) (AJ) (AK) (AL) (AS) (AT) (AV) (AX) (AY)	(AA) (AB) (AC) (AE) (AI) (AJ) (AK) (AL) (AR) (AS) (AT) (AV) (AX) (AY) (BA)	(AA) (AB) (AC) (AE) (AI) (AJ) (AK) (AL) (AS) (AT) (AV) (AX) (AY)	(AA) (AB)	(AA) (AB) (AE) (AK) (AX)		(AA) (AB) (AK)	(AA) (AB) (AE) (AI) (AJ) (AK) (AL) (AS) (AT) (AV) (AX) (AY)	(AA) (AB) (AC) (AE) (AI) (AJ) (AK) (AL) (AQ) (AR) (AS) (AT) (AV) (AX) (AY) (BA)	(AA) (AB) (AC) (AE) (AI) (AJ) (AK) (AL) (AM) (AQ) (AR) (AS) (AT) (AV) (AX) (AY) (BA)	(AA) (AB) (AC) (AE) (AI) (AJ) (AK) (AL) (AS) (AT) (AV) (AX) (AY)	(AA) (AB) (AE) (AI) (AJ) (AK) (AL) (AS) (AT) (AV) (AX) (AY)	(AA) (AB) (AE) (AI) (AK) (AL) (AT) (AX) (AY)	(AA) (AB) (AK) (AX)	(AA) (AB)	(AA) (AB) (AC) (AE) (AI) (AJ) (AK) (AL) (AQ) (AR) (AS) (AT) (AV) (AX) (AY) (BA)	(AA) (AB) (AK)	(AA) (AB) (AC) (AE) (AI) (AJ) (AK) (AL) (AR) (AS) (AT) (AV) (AX) (AY) (BA)		(AA) (AB)	(AA) (AB) (AC) (AE) (AF) (AG) (AH) (AI) (AJ) (AK) (AL) (AM) (AP) (AQ) (AR) (AS) (AT) (AV) (AX) (AY) (BA)	(AA) (AB) (AE) (AI) (AK) (AL) (AS) (AT) (AV) (AX) (AY)
Rather satisfied	11370	473	222	336	618	402	624	385	209	454	513	464	418	158	545	556	238	292	174	545	341	444	638	469	389	311	648	534
	43.2	45.2	22	32	59.6	39.1	58.8	35.3	20.6	45.1	49.6	44.6	41	31.5	51.9	53.8	47.5	28.2	31.4	54.1	33.4	43.7	60.9	45.3	37.4	30.9	61.6	53.4
		(AB) (AC) (AE) (AG) (AH) (AM) (AQ) (AR) (AT) (AX) (AY)		(AB) (AH)	(AA) (AB) (AC) (AE) (AG) (AH) (AI) (AJ) (AK) (AL) (AM) (AN) (AO) (AP) (AQ) (AR) (AS) (AT) (AU) (AW) (AX) (AY) (BA)	(AB) (AC) (AH) (AM) (AQ) (AR) (AT) (AY)	(AA) (AB) (AC) (AE) (AG) (AH) (AI) (AJ) (AK) (AL) (AM) (AN) (AO) (AP) (AQ) (AR) (AS) (AT) (AU) (AW) (AX) (AY) (BA)	(AB) (AH) (AQ) (AY)		(AB) (AC) (AE) (AG) (AH) (AM) (AQ) (AR) (AT) (AX) (AY)	(AA) (AB) (AC) (AE) (AG) (AH) (AK) (AL) (AM) (AQ) (AR) (AT) (AU) (AX) (AY)	(AB) (AC) (AE) (AG) (AH) (AM) (AQ) (AR) (AT) (AX) (AY)	(AB) (AC) (AG) (AH) (AM) (AQ) (AR) (AT) (AY)	(AB) (AH)	(AA) (AB) (AC) (AE) (AG) (AH) (AI) (AK) (AL) (AM) (AQ) (AR) (AT) (AU) (AW) (AX) (AY)	(AA) (AB) (AC) (AE) (AG) (AH) (AI) (AK) (AL) (AM) (AP) (AQ) (AR) (AT) (AU) (AW) (AX) (AY)	(AB) (AC) (AE) (AG) (AH) (AL) (AM) (AQ) (AR) (AT) (AX) (AY)	(AB) (AH)	(AB) (AH)	(AA) (AB) (AC) (AE) (AG) (AH) (AI) (AJ) (AK) (AL) (AM) (AP) (AQ) (AR) (AT) (AU) (AW) (AX) (AY)	(AB) (AH) (AQ)	(AB) (AC) (AE) (AG) (AH) (AM) (AQ) (AR) (AT) (AX) (AY)	(AA) (AB) (AC) (AE) (AG) (AH) (AI) (AJ) (AK) (AL) (AM) (AN) (AO) (AP) (AQ) (AR) (AS) (AT) (AU) (AW) (AX) (AY) (BA)	(AB) (AC) (AE) (AG) (AH) (AM) (AQ) (AR) (AT) (AX) (AY)	(AB) (AC) (AH) (AM) (AQ) (AR) (AY)	(AB) (AH)	(AA) (AB) (AC) (AE) (AG) (AH) (AI) (AJ) (AK) (AL) (AM) (AN) (AO) (AP) (AQ) (AR) (AS) (AT) (AU) (AW) (AX) (AY) (BA)	(AA) (AB) (AC) (AE) (AG) (AH) (AI) (AK) (AL) (AM) (AP) (AQ) (AR) (AT) (AU) (AW) (AX) (AY)
Rather not satisfied	6581	242	421	323	110	292	142	230	183	255	217	275	332	116	168	161	93	265	146	192	308	222	198	212	316	261	119	199
	25	23.2	41.7	30.8	10.6	28.4	13.3	21.1	18.1	25.3	21	26.4	32.6	23.1	16	15.6	18.5	25.6	26.4	19.1	30.1	21.9	18.9	20.5	30.4	26	11.4	19.9
		(AD) (AF) (AH) (AN) (AO) (AP) (AS) (AV) (AZ)	(AA) (AC) (AD) (AE) (AF) (AG) (AH) (AI) (AJ) (AK) (AL) (AM) (AN) (AO) (AP) (AQ) (AR) (AS) (AT) (AU) (AV) (AW) (AX) (AY) (AZ) (BA)	(AA) (AD) (AF) (AG) (AH) (AI) (AJ) (AK) (AM) (AN) (AO) (AP) (AQ) (AS) (AU) (AV) (AW) (AY) (AZ) (BA)		(AA) (AD) (AF) (AG) (AH) (AJ) (AM) (AN) (AO) (AP) (AS) (AU) (AV) (AW) (AZ) (BA)		(AD) (AF) (AN) (AO) (AZ)	(AD) (AF) (AZ)	(AD) (AF) (AG) (AH) (AJ) (AN) (AO) (AP) (AS) (AV) (AW) (AZ) (BA)	(AD) (AF) (AN) (AO) (AZ)	(AD) (AF) (AG) (AH) (AJ) (AN) (AO) (AP) (AS) (AU) (AV) (AW) (AZ) (BA)	(AA) (AD) (AE) (AF) (AG) (AH) (AI) (AJ) (AK) (AM) (AN) (AO) (AP) (AQ) (AR) (AS) (AU) (AV) (AW) (AY) (AZ) (BA)	(AD) (AF) (AH) (AN) (AO) (AZ)	(AD) (AZ)	(AD) (AZ)	(AD) (AF) (AZ)	(AD) (AF) (AG) (AH) (AJ) (AN) (AO) (AP) (AS) (AV) (AW) (AZ) (BA)	(AD) (AF) (AG) (AH) (AJ) (AN) (AO) (AP) (AS) (AV) (AW) (AZ) (BA)	(AD) (AF) (AZ)	(AA) (AD) (AF) (AG) (AH) (AI) (AJ) (AM) (AN) (AO) (AP) (AQ) (AS) (AU) (AV) (AW) (AY) (AZ) (BA)	(AD) (AF) (AN) (AO) (AZ)	(AD) (AF) (AZ)	(AD) (AF) (AN) (AO) (AZ)	(AA) (AD) (AF) (AG) (AH) (AI) (AJ) (AM) (AN) (AO) (AP) (AQ) (AS) (AU) (AV) (AW) (AY) (AZ) (BA)	(AD) (AF) (AG) (AH) (AJ) (AN) (AO) (AP) (AS) (AU) (AV) (AW) (AZ) (BA)		(AD) (AF) (AN) (AO) (AZ)
Not at all satisfied	4013	162	246	239	38	179	82	236	443	159	123	127	140	137	94	83	49	244	89	86	205	137	74	127	143	286	35	82
	15.2	15.5	24.4	22.8	3.7	17.4	7.7	21.6	43.8	15.8	11.8	12.2	13.8	27.3	9	8.1	9.7	23.6	16.2	8.6	20.1	13.5	7.1	12.3	13.8	28.4	3.4	8.2
		(AD) (AF) (AJ) (AK) (AN) (AO) (AP) (AS) (AV) (AZ) (BA)	(AA) (AD) (AE) (AF) (AI) (AJ) (AK) (AL) (AN) (AO) (AP) (AR) (AS) (AT) (AU) (AV) (AW) (AX) (AZ) (BA)	(AA) (AD) (AE) (AF) (AI) (AJ) (AK) (AL) (AN) (AO) (AP) (AR) (AS) (AU) (AV) (AW) (AX) (AZ) (BA)		(AD) (AF) (AJ) (AK) (AL) (AN) (AO) (AP) (AS) (AU) (AV) (AW) (AX) (AZ) (BA)	(AD) (AZ)	(AA) (AD) (AE) (AF) (AI) (AJ) (AK) (AL) (AN) (AO) (AP) (AR) (AS) (AU) (AV) (AW) (AX) (AZ) (BA)	(AA) (AB) (AC) (AD) (AE) (AF) (AG) (AI) (AJ) (AK) (AL) (AM) (AN) (AO) (AP) (AQ) (AR) (AS) (AT) (AU) (AV) (AW) (AX) (AY) (AZ) (BA)	(AD) (AF) (AJ) (AK) (AN) (AO) (AP) (AS) (AV) (AW) (AZ) (BA)	(AD) (AF) (AN) (AO) (AS) (AV) (AZ) (BA)	(AD) (AF) (AN) (AO) (AS) (AV) (AZ) (BA)	(AD) (AF) (AN) (AO) (AP) (AS) (AV) (AZ) (BA)	(AA) (AD) (AE) (AF) (AG) (AI) (AJ) (AK) (AL) (AN) (AO) (AP) (AR) (AS) (AT) (AU) (AV) (AW) (AX) (AZ) (BA)	(AD) (AZ)	(AD) (AZ)	(AD) (AZ)	(AA) (AD) (AE) (AF) (AI) (AJ) (AK) (AL) (AN) (AO) (AP) (AR) (AS) (AU) (AV) (AW) (AX) (AZ) (BA)	(AD) (AF) (AJ) (AK) (AN) (AO) (AP) (AS) (AV) (AZ) (BA)	(AD) (AZ)	(AA) (AD) (AF) (AI) (AJ) (AK) (AL) (AN) (AO) (AP) (AS) (AU) (AV) (AW) (AX) (AZ) (BA)	(AD) (AF) (AN) (AO) (AP) (AS) (AV) (AZ) (BA)	(AD) (AZ)	(AD) (AF) (AN) (AO) (AS) (AV) (AZ) (BA)	(AD) (AF) (AN) (AO) (AP) (AS) (AV) (AZ) (BA)	(AA) (AC) (AD) (AE) (AF) (AG) (AI) (AJ) (AK) (AL) (AN) (AO) (AP) (AQ) (AR) (AS) (AT) (AU) (AV) (AW) (AX) (AZ) (BA)		(AD) (AZ)
Don’t know	2283	133	88	60	96	102	81	87	51	84	105	132	64	36	89	77	56	118	91	110	114	67	66	79	140	94	66	87
	8.7	12.7	8.7	5.7	9.2	9.9	7.6	8	5	8.3	10.2	12.7	6.3	7.2	8.5	7.5	11.2	11.4	16.5	10.9	11.1	6.6	6.3	7.6	13.5	9.3	6.3	8.7
		(AB) (AC) (AD) (AE) (AF) (AG) (AH) (AI) (AL) (AM) (AN) (AO) (AU) (AV) (AW) (AY) (AZ) (BA)	(AC) (AH)		(AC) (AH) (AL) (AU) (AV) (AZ)	(AC) (AH) (AL) (AU) (AV) (AZ)	(AH)	(AC) (AH)		(AC) (AH)	(AC) (AH) (AL) (AU) (AV) (AZ)	(AB) (AC) (AD) (AF) (AG) (AH) (AI) (AL) (AM) (AN) (AO) (AU) (AV) (AW) (AY) (AZ) (BA)			(AC) (AH)		(AC) (AF) (AG) (AH) (AL) (AM) (AO) (AU) (AV) (AW) (AZ)	(AC) (AF) (AG) (AH) (AI) (AL) (AM) (AN) (AO) (AU) (AV) (AW) (AZ)	(AB) (AC) (AD) (AE) (AF) (AG) (AH) (AI) (AJ) (AL) (AM) (AN) (AO) (AP) (AQ) (AS) (AT) (AU) (AV) (AW) (AY) (AZ) (BA)	(AC) (AF) (AG) (AH) (AL) (AM) (AO) (AU) (AV) (AW) (AZ)	(AC) (AF) (AG) (AH) (AI) (AL) (AM) (AO) (AU) (AV) (AW) (AZ)			(AH)	(AB) (AC) (AD) (AE) (AF) (AG) (AH) (AI) (AJ) (AL) (AM) (AN) (AO) (AU) (AV) (AW) (AY) (AZ) (BA)	(AC) (AH) (AL) (AU) (AV) (AZ)		(AC) (AH) (AZ)
Total 'Satisfied'	13461	509	255	428	793	456	757	539	334	508	589	507	482	213	699	713	304	409	226	619	395	591	709	617	440	364	831	633
	51.1	48.7	25.2	40.7	76.4	44.3	71.3	49.4	33	50.5	57	48.7	47.3	42.3	66.5	68.9	60.5	39.5	41	61.5	38.7	58.1	67.7	59.6	42.3	36.3	79	63.2
		(AB) (AC) (AH) (AM) (AQ) (AR) (AT) (AX) (AY)		(AB) (AH) (AY)	(AA) (AB) (AC) (AE) (AF) (AG) (AH) (AI) (AJ) (AK) (AL) (AM) (AN) (AO) (AP) (AQ) (AR) (AS) (AT) (AU) (AV) (AW) (AX) (AY) (BA)	(AB) (AH) (AQ) (AT) (AY)	(AA) (AB) (AC) (AE) (AG) (AH) (AI) (AJ) (AK) (AL) (AM) (AN) (AP) (AQ) (AR) (AS) (AT) (AU) (AW) (AX) (AY) (BA)	(AB) (AC) (AE) (AH) (AM) (AQ) (AR) (AT) (AX) (AY)	(AB)	(AB) (AC) (AE) (AH) (AM) (AQ) (AR) (AT) (AX) (AY)	(AA) (AB) (AC) (AE) (AG) (AH) (AI) (AK) (AL) (AM) (AQ) (AR) (AT) (AX) (AY)	(AB) (AC) (AH) (AM) (AQ) (AR) (AT) (AX) (AY)	(AB) (AC) (AH) (AQ) (AR) (AT) (AX) (AY)	(AB) (AH) (AY)	(AA) (AB) (AC) (AE) (AG) (AH) (AI) (AJ) (AK) (AL) (AM) (AP) (AQ) (AR) (AS) (AT) (AU) (AW) (AX) (AY)	(AA) (AB) (AC) (AE) (AG) (AH) (AI) (AJ) (AK) (AL) (AM) (AP) (AQ) (AR) (AS) (AT) (AU) (AW) (AX) (AY) (BA)	(AA) (AB) (AC) (AE) (AG) (AH) (AI) (AK) (AL) (AM) (AQ) (AR) (AT) (AX) (AY)	(AB) (AH)	(AB) (AH)	(AA) (AB) (AC) (AE) (AG) (AH) (AI) (AJ) (AK) (AL) (AM) (AQ) (AR) (AT) (AX) (AY)	(AB) (AH)	(AA) (AB) (AC) (AE) (AG) (AH) (AI) (AK) (AL) (AM) (AQ) (AR) (AT) (AX) (AY)	(AA) (AB) (AC) (AE) (AG) (AH) (AI) (AJ) (AK) (AL) (AM) (AP) (AQ) (AR) (AS) (AT) (AU) (AW) (AX) (AY) (BA)	(AA) (AB) (AC) (AE) (AG) (AH) (AI) (AK) (AL) (AM) (AQ) (AR) (AT) (AX) (AY)	(AB) (AH) (AY)	(AB)	(AA) (AB) (AC) (AE) (AF) (AG) (AH) (AI) (AJ) (AK) (AL) (AM) (AN) (AO) (AP) (AQ) (AR) (AS) (AT) (AU) (AV) (AW) (AX) (AY) (BA)	(AA) (AB) (AC) (AE) (AG) (AH) (AI) (AJ) (AK) (AL) (AM) (AQ) (AR) (AT) (AU) (AX) (AY)
Total 'Not satisfied'	10594	404	667	562	149	471	223	466	626	413	339	403	472	253	262	245	142	509	235	279	513	359	272	339	459	547	155	281
	40.2	38.6	66.1	53.6	14.3	45.8	21	42.7	62	41.1	32.8	38.6	46.3	50.4	25	23.7	28.3	49.2	42.6	27.7	50.2	35.3	26	32.8	44.2	54.4	14.7	28.1
		(AD) (AF) (AJ) (AN) (AO) (AP) (AS) (AV) (AW) (AZ) (BA)	(AA) (AC) (AD) (AE) (AF) (AG) (AI) (AJ) (AK) (AL) (AM) (AN) (AO) (AP) (AQ) (AR) (AS) (AT) (AU) (AV) (AW) (AX) (AY) (AZ) (BA)	(AA) (AD) (AE) (AF) (AG) (AI) (AJ) (AK) (AL) (AN) (AO) (AP) (AR) (AS) (AU) (AV) (AW) (AX) (AZ) (BA)		(AA) (AD) (AF) (AI) (AJ) (AK) (AN) (AO) (AP) (AS) (AU) (AV) (AW) (AZ) (BA)	(AD) (AZ)	(AD) (AF) (AJ) (AN) (AO) (AP) (AS) (AU) (AV) (AW) (AZ) (BA)	(AA) (AC) (AD) (AE) (AF) (AG) (AI) (AJ) (AK) (AL) (AM) (AN) (AO) (AP) (AQ) (AR) (AS) (AT) (AU) (AV) (AW) (AX) (AY) (AZ) (BA)	(AD) (AF) (AJ) (AN) (AO) (AP) (AS) (AU) (AV) (AW) (AZ) (BA)	(AD) (AF) (AN) (AO) (AS) (AV) (AZ) (BA)	(AD) (AF) (AJ) (AN) (AO) (AP) (AS) (AV) (AW) (AZ) (BA)	(AA) (AD) (AF) (AI) (AJ) (AK) (AN) (AO) (AP) (AS) (AU) (AV) (AW) (AZ) (BA)	(AA) (AD) (AF) (AG) (AI) (AJ) (AK) (AN) (AO) (AP) (AR) (AS) (AU) (AV) (AW) (AX) (AZ) (BA)	(AD) (AZ)	(AD) (AZ)	(AD) (AF) (AZ)	(AA) (AD) (AF) (AG) (AI) (AJ) (AK) (AN) (AO) (AP) (AR) (AS) (AU) (AV) (AW) (AX) (AZ) (BA)	(AD) (AF) (AJ) (AN) (AO) (AP) (AS) (AU) (AV) (AW) (AZ) (BA)	(AD) (AF) (AZ)	(AA) (AD) (AE) (AF) (AG) (AI) (AJ) (AK) (AN) (AO) (AP) (AR) (AS) (AU) (AV) (AW) (AX) (AZ) (BA)	(AD) (AF) (AN) (AO) (AP) (AS) (AV) (AZ) (BA)	(AD) (AF) (AZ)	(AD) (AF) (AN) (AO) (AS) (AV) (AZ) (BA)	(AA) (AD) (AF) (AJ) (AK) (AN) (AO) (AP) (AS) (AU) (AV) (AW) (AZ) (BA)	(AA) (AD) (AE) (AF) (AG) (AI) (AJ) (AK) (AL) (AN) (AO) (AP) (AQ) (AR) (AS) (AU) (AV) (AW) (AX) (AZ) (BA)		(AD) (AF) (AO) (AZ)

## Sheet: Q2_2
Home
Flash Eurobarometer 514
EU’s response to the energy challenges
Fieldwork: 23/11-30/11/2022
VOLUME A (Weighted)
Q2_2 How satisfied or dissatisfied are you with the way the following have reacted to the war in Ukraine? The European Union
Base: All
		Country	Country	Country	Country	Country	Country	Country	Country	Country	Country	Country	Country	Country	Country	Country	Country	Country	Country	Country	Country	Country	Country	Country	Country	Country	Country	Country
	EU27	BE	BG	CZ	DK	DE	EE	IE	EL	ES	FR	HR	IT	CY	LV	LT	LU	HU	MT	NL	AT	PL	PT	RO	SI	SK	FI	SE
		(AA)	(AB)	(AC)	(AD)	(AE)	(AF)	(AG)	(AH)	(AI)	(AJ)	(AK)	(AL)	(AM)	(AN)	(AO)	(AP)	(AQ)	(AR)	(AS)	(AT)	(AU)	(AV)	(AW)	(AX)	(AY)	(AZ)	(BA)
Base: Total	26337	1047	1010	1050	1037	1028	1061	1091	1011	1005	1034	1042	1019	502	1050	1035	502	1036	552	1007	1022	1017	1047	1035	1039	1005	1052	1001
Base: Weighted Total	26337	1047	1010	1050	1037	1028	1061	1091	1011	1005	1034	1042	1019	502	1050	1035	502	1036	552	1007	1022	1017	1047	1035	1039	1005	1052	1001
Very satisfied	2021	55	79	60	156	51	53	131	77	71	81	71	77	58	112	86	45	80	53	86	65	79	121	168	60	75	97	92
	7.7	5.2	7.8	5.7	15	5	5	12	7.6	7	7.9	6.8	7.6	11.5	10.7	8.3	8.9	7.7	9.6	8.5	6.4	7.8	11.6	16.2	5.7	7.4	9.2	9.2
			(AA) (AE) (AF)		(AA) (AB) (AC) (AE) (AF) (AH) (AI) (AJ) (AK) (AL) (AN) (AO) (AP) (AQ) (AR) (AS) (AT) (AU) (AV) (AX) (AY) (AZ) (BA)			(AA) (AB) (AC) (AE) (AF) (AH) (AI) (AJ) (AK) (AL) (AO) (AQ) (AS) (AT) (AU) (AX) (AY) (AZ) (BA)	(AA) (AE) (AF)		(AA) (AE) (AF)		(AA) (AE) (AF)	(AA) (AB) (AC) (AE) (AF) (AH) (AI) (AJ) (AK) (AL) (AQ) (AT) (AU) (AX) (AY)	(AA) (AC) (AE) (AF) (AH) (AI) (AJ) (AK) (AL) (AQ) (AT) (AU) (AX) (AY)	(AA) (AC) (AE) (AF) (AX)	(AA) (AC) (AE) (AF) (AX)	(AA) (AE) (AF)	(AA) (AC) (AE) (AF) (AT) (AX)	(AA) (AC) (AE) (AF) (AX)		(AA) (AE) (AF)	(AA) (AB) (AC) (AE) (AF) (AH) (AI) (AJ) (AK) (AL) (AO) (AQ) (AS) (AT) (AU) (AX) (AY)	(AA) (AB) (AC) (AE) (AF) (AG) (AH) (AI) (AJ) (AK) (AL) (AM) (AN) (AO) (AP) (AQ) (AR) (AS) (AT) (AU) (AV) (AX) (AY) (AZ) (BA)		(AA) (AE) (AF)	(AA) (AC) (AE) (AF) (AT) (AX)	(AA) (AC) (AE) (AF) (AT) (AX)
Rather satisfied	10815	429	314	351	533	414	520	416	201	421	483	409	334	108	536	525	229	356	202	499	276	480	553	470	398	320	539	482
	41.1	41	31	33.5	51.4	40.3	49	38.1	19.9	41.9	46.7	39.2	32.7	21.5	51	50.7	45.7	34.4	36.6	49.6	27	47.2	52.8	45.4	38.3	31.8	51.2	48.2
		(AB) (AC) (AH) (AL) (AM) (AQ) (AT) (AY)	(AH) (AM)	(AH) (AM) (AT)	(AA) (AB) (AC) (AE) (AG) (AH) (AI) (AJ) (AK) (AL) (AM) (AP) (AQ) (AR) (AT) (AW) (AX) (AY)	(AB) (AC) (AH) (AL) (AM) (AQ) (AT) (AY)	(AA) (AB) (AC) (AE) (AG) (AH) (AI) (AK) (AL) (AM) (AQ) (AR) (AT) (AX) (AY)	(AB) (AC) (AH) (AL) (AM) (AT) (AY)		(AB) (AC) (AH) (AL) (AM) (AQ) (AT) (AY)	(AA) (AB) (AC) (AE) (AG) (AH) (AI) (AK) (AL) (AM) (AQ) (AR) (AT) (AX) (AY)	(AB) (AC) (AH) (AL) (AM) (AQ) (AT) (AY)	(AH) (AM) (AT)		(AA) (AB) (AC) (AE) (AG) (AH) (AI) (AK) (AL) (AM) (AQ) (AR) (AT) (AW) (AX) (AY)	(AA) (AB) (AC) (AE) (AG) (AH) (AI) (AK) (AL) (AM) (AQ) (AR) (AT) (AW) (AX) (AY)	(AB) (AC) (AG) (AH) (AK) (AL) (AM) (AQ) (AR) (AT) (AX) (AY)	(AH) (AM) (AT)	(AH) (AM) (AT)	(AA) (AB) (AC) (AE) (AG) (AH) (AI) (AK) (AL) (AM) (AQ) (AR) (AT) (AX) (AY)	(AH) (AM)	(AA) (AB) (AC) (AE) (AG) (AH) (AI) (AK) (AL) (AM) (AQ) (AR) (AT) (AX) (AY)	(AA) (AB) (AC) (AE) (AG) (AH) (AI) (AJ) (AK) (AL) (AM) (AP) (AQ) (AR) (AT) (AU) (AW) (AX) (AY)	(AB) (AC) (AE) (AG) (AH) (AK) (AL) (AM) (AQ) (AR) (AT) (AX) (AY)	(AB) (AC) (AH) (AL) (AM) (AT) (AY)	(AH) (AM) (AT)	(AA) (AB) (AC) (AE) (AG) (AH) (AI) (AJ) (AK) (AL) (AM) (AQ) (AR) (AT) (AW) (AX) (AY)	(AA) (AB) (AC) (AE) (AG) (AH) (AI) (AK) (AL) (AM) (AQ) (AR) (AT) (AX) (AY)
Rather not satisfied	7056	267	321	325	159	280	300	236	210	295	217	329	372	119	239	288	121	277	131	214	322	269	258	190	307	245	286	226
	26.8	25.5	31.8	30.9	15.4	27.2	28.3	21.6	20.8	29.4	21	31.6	36.5	23.8	22.7	27.9	24.1	26.7	23.7	21.3	31.5	26.5	24.7	18.4	29.6	24.4	27.2	22.5
		(AD) (AG) (AH) (AJ) (AS) (AW)	(AA) (AD) (AE) (AG) (AH) (AJ) (AM) (AN) (AP) (AQ) (AR) (AS) (AU) (AV) (AW) (AY) (AZ) (BA)	(AA) (AD) (AG) (AH) (AJ) (AM) (AN) (AP) (AQ) (AR) (AS) (AU) (AV) (AW) (AY) (BA)		(AD) (AG) (AH) (AJ) (AN) (AS) (AW) (BA)	(AD) (AG) (AH) (AJ) (AN) (AS) (AW) (BA)	(AD)	(AD)	(AD) (AG) (AH) (AJ) (AM) (AN) (AP) (AR) (AS) (AV) (AW) (AY) (BA)	(AD)	(AA) (AD) (AE) (AG) (AH) (AJ) (AM) (AN) (AP) (AQ) (AR) (AS) (AU) (AV) (AW) (AY) (AZ) (BA)	(AA) (AC) (AD) (AE) (AF) (AG) (AH) (AI) (AJ) (AK) (AM) (AN) (AO) (AP) (AQ) (AR) (AS) (AT) (AU) (AV) (AW) (AX) (AY) (AZ) (BA)	(AD) (AW)	(AD) (AW)	(AD) (AG) (AH) (AJ) (AN) (AS) (AW) (BA)	(AD) (AW)	(AD) (AG) (AH) (AJ) (AS) (AW) (BA)	(AD) (AW)	(AD)	(AA) (AD) (AE) (AG) (AH) (AJ) (AM) (AN) (AP) (AQ) (AR) (AS) (AU) (AV) (AW) (AY) (AZ) (BA)	(AD) (AG) (AH) (AJ) (AS) (AW) (BA)	(AD) (AW)		(AA) (AD) (AG) (AH) (AJ) (AM) (AN) (AP) (AR) (AS) (AV) (AW) (AY) (BA)	(AD) (AW)	(AD) (AG) (AH) (AJ) (AN) (AS) (AW) (BA)	(AD) (AW)
Not at all satisfied	4555	192	237	256	65	200	116	233	494	165	152	146	186	196	89	84	69	246	131	102	298	121	74	147	190	291	59	93
	17.3	18.3	23.4	24.4	6.3	19.4	10.9	21.4	48.8	16.4	14.7	14	18.2	39	8.5	8.1	13.7	23.8	23.6	10.1	29.1	11.9	7.1	14.2	18.3	28.9	5.7	9.3
		(AD) (AF) (AJ) (AK) (AN) (AO) (AP) (AS) (AU) (AV) (AW) (AZ) (BA)	(AA) (AD) (AE) (AF) (AI) (AJ) (AK) (AL) (AN) (AO) (AP) (AS) (AU) (AV) (AW) (AX) (AZ) (BA)	(AA) (AD) (AE) (AF) (AI) (AJ) (AK) (AL) (AN) (AO) (AP) (AS) (AU) (AV) (AW) (AX) (AZ) (BA)		(AD) (AF) (AJ) (AK) (AN) (AO) (AP) (AS) (AU) (AV) (AW) (AZ) (BA)	(AD) (AV) (AZ)	(AD) (AF) (AI) (AJ) (AK) (AN) (AO) (AP) (AS) (AU) (AV) (AW) (AZ) (BA)	(AA) (AB) (AC) (AD) (AE) (AF) (AG) (AI) (AJ) (AK) (AL) (AM) (AN) (AO) (AP) (AQ) (AR) (AS) (AT) (AU) (AV) (AW) (AX) (AY) (AZ) (BA)	(AD) (AF) (AN) (AO) (AS) (AU) (AV) (AZ) (BA)	(AD) (AF) (AN) (AO) (AS) (AV) (AZ) (BA)	(AD) (AF) (AN) (AO) (AS) (AV) (AZ) (BA)	(AD) (AF) (AJ) (AK) (AN) (AO) (AP) (AS) (AU) (AV) (AW) (AZ) (BA)	(AA) (AB) (AC) (AD) (AE) (AF) (AG) (AI) (AJ) (AK) (AL) (AN) (AO) (AP) (AQ) (AR) (AS) (AT) (AU) (AV) (AW) (AX) (AY) (AZ) (BA)	(AZ)		(AD) (AN) (AO) (AV) (AZ) (BA)	(AA) (AD) (AE) (AF) (AI) (AJ) (AK) (AL) (AN) (AO) (AP) (AS) (AU) (AV) (AW) (AX) (AZ) (BA)	(AA) (AD) (AF) (AI) (AJ) (AK) (AL) (AN) (AO) (AP) (AS) (AU) (AV) (AW) (AX) (AZ) (BA)	(AD) (AV) (AZ)	(AA) (AB) (AC) (AD) (AE) (AF) (AG) (AI) (AJ) (AK) (AL) (AN) (AO) (AP) (AQ) (AR) (AS) (AU) (AV) (AW) (AX) (AZ) (BA)	(AD) (AN) (AO) (AV) (AZ)		(AD) (AF) (AN) (AO) (AS) (AV) (AZ) (BA)	(AD) (AF) (AJ) (AK) (AN) (AO) (AP) (AS) (AU) (AV) (AW) (AZ) (BA)	(AA) (AB) (AC) (AD) (AE) (AF) (AG) (AI) (AJ) (AK) (AL) (AN) (AO) (AP) (AQ) (AR) (AS) (AU) (AV) (AW) (AX) (AZ) (BA)		(AD) (AZ)
Don’t know	1890	105	60	58	123	83	72	75	29	53	100	87	50	21	74	52	38	78	36	106	61	68	41	59	84	75	71	108
	7.2	10	5.9	5.5	11.9	8	6.8	6.8	2.9	5.3	9.7	8.4	4.9	4.2	7	5	7.6	7.5	6.5	10.5	6	6.7	3.9	5.7	8	7.4	6.7	10.8
		(AB) (AC) (AF) (AG) (AH) (AI) (AL) (AM) (AN) (AO) (AR) (AT) (AU) (AV) (AW) (AY) (AZ)	(AH)	(AH)	(AB) (AC) (AE) (AF) (AG) (AH) (AI) (AK) (AL) (AM) (AN) (AO) (AP) (AQ) (AR) (AT) (AU) (AV) (AW) (AX) (AY) (AZ)	(AC) (AH) (AI) (AL) (AM) (AO) (AV)	(AH) (AV)	(AH) (AV)		(AH)	(AB) (AC) (AF) (AG) (AH) (AI) (AL) (AM) (AN) (AO) (AR) (AT) (AU) (AV) (AW) (AZ)	(AC) (AH) (AI) (AL) (AM) (AO) (AT) (AV) (AW)	(AH)		(AH) (AM) (AV)	(AH)	(AH) (AM) (AV)	(AH) (AL) (AM) (AO) (AV)	(AH) (AV)	(AB) (AC) (AF) (AG) (AH) (AI) (AL) (AM) (AN) (AO) (AQ) (AR) (AT) (AU) (AV) (AW) (AY) (AZ)	(AH) (AV)	(AH) (AV)		(AH)	(AC) (AH) (AI) (AL) (AM) (AO) (AV)	(AH) (AL) (AM) (AV)	(AH) (AV)	(AB) (AC) (AE) (AF) (AG) (AH) (AI) (AL) (AM) (AN) (AO) (AQ) (AR) (AT) (AU) (AV) (AW) (AX) (AY) (AZ)
Total 'Satisfied'	12836	484	393	412	689	466	573	547	278	491	564	480	411	165	648	611	274	435	255	585	341	559	674	638	458	395	636	574
	48.7	46.2	38.9	39.2	66.5	45.3	54	50.2	27.5	48.9	54.6	46	40.3	32.9	61.7	59	54.6	42	46.2	58.1	33.4	54.9	64.4	61.7	44.1	39.3	60.5	57.3
		(AB) (AC) (AH) (AL) (AM) (AT) (AY)	(AH) (AM) (AT)	(AH) (AM) (AT)	(AA) (AB) (AC) (AE) (AF) (AG) (AH) (AI) (AJ) (AK) (AL) (AM) (AN) (AO) (AP) (AQ) (AR) (AS) (AT) (AU) (AW) (AX) (AY) (AZ) (BA)	(AB) (AC) (AH) (AL) (AM) (AT) (AY)	(AA) (AB) (AC) (AE) (AH) (AI) (AK) (AL) (AM) (AQ) (AR) (AT) (AX) (AY)	(AB) (AC) (AE) (AH) (AL) (AM) (AQ) (AT) (AX) (AY)		(AB) (AC) (AH) (AL) (AM) (AQ) (AT) (AX) (AY)	(AA) (AB) (AC) (AE) (AH) (AI) (AK) (AL) (AM) (AQ) (AR) (AT) (AX) (AY)	(AB) (AC) (AH) (AL) (AM) (AT) (AY)	(AH) (AM) (AT)	(AH)	(AA) (AB) (AC) (AE) (AF) (AG) (AH) (AI) (AJ) (AK) (AL) (AM) (AP) (AQ) (AR) (AT) (AU) (AX) (AY)	(AA) (AB) (AC) (AE) (AF) (AG) (AH) (AI) (AK) (AL) (AM) (AQ) (AR) (AT) (AX) (AY)	(AA) (AB) (AC) (AE) (AH) (AI) (AK) (AL) (AM) (AQ) (AR) (AT) (AX) (AY)	(AH) (AM) (AT)	(AB) (AC) (AH) (AL) (AM) (AT) (AY)	(AA) (AB) (AC) (AE) (AG) (AH) (AI) (AK) (AL) (AM) (AQ) (AR) (AT) (AX) (AY)	(AH)	(AA) (AB) (AC) (AE) (AG) (AH) (AI) (AK) (AL) (AM) (AQ) (AR) (AT) (AX) (AY)	(AA) (AB) (AC) (AE) (AF) (AG) (AH) (AI) (AJ) (AK) (AL) (AM) (AO) (AP) (AQ) (AR) (AS) (AT) (AU) (AX) (AY) (BA)	(AA) (AB) (AC) (AE) (AF) (AG) (AH) (AI) (AJ) (AK) (AL) (AM) (AP) (AQ) (AR) (AT) (AU) (AX) (AY)	(AB) (AC) (AH) (AM) (AT) (AY)	(AH) (AM) (AT)	(AA) (AB) (AC) (AE) (AF) (AG) (AH) (AI) (AJ) (AK) (AL) (AM) (AP) (AQ) (AR) (AT) (AU) (AX) (AY)	(AA) (AB) (AC) (AE) (AG) (AH) (AI) (AK) (AL) (AM) (AQ) (AR) (AT) (AX) (AY)
Total 'Not satisfied'	11611	459	558	580	225	480	416	469	704	461	369	475	558	315	328	372	190	523	261	316	620	390	332	337	497	535	345	319
	44.1	43.8	55.2	55.3	21.7	46.7	39.2	43	69.6	45.8	35.7	45.6	54.7	62.8	31.2	36	37.8	50.5	47.3	31.4	60.6	38.4	31.7	32.6	47.9	53.3	32.8	31.8
		(AD) (AF) (AJ) (AN) (AO) (AP) (AS) (AU) (AV) (AW) (AZ) (BA)	(AA) (AD) (AE) (AF) (AG) (AI) (AJ) (AK) (AN) (AO) (AP) (AR) (AS) (AU) (AV) (AW) (AX) (AZ) (BA)	(AA) (AD) (AE) (AF) (AG) (AI) (AJ) (AK) (AN) (AO) (AP) (AQ) (AR) (AS) (AU) (AV) (AW) (AX) (AZ) (BA)		(AD) (AF) (AJ) (AN) (AO) (AP) (AS) (AU) (AV) (AW) (AZ) (BA)	(AD) (AN) (AS) (AV) (AW) (AZ) (BA)	(AD) (AJ) (AN) (AO) (AS) (AU) (AV) (AW) (AZ) (BA)	(AA) (AB) (AC) (AD) (AE) (AF) (AG) (AI) (AJ) (AK) (AL) (AM) (AN) (AO) (AP) (AQ) (AR) (AS) (AT) (AU) (AV) (AW) (AX) (AY) (AZ) (BA)	(AD) (AF) (AJ) (AN) (AO) (AP) (AS) (AU) (AV) (AW) (AZ) (BA)	(AD) (AN) (AS)	(AD) (AF) (AJ) (AN) (AO) (AP) (AS) (AU) (AV) (AW) (AZ) (BA)	(AA) (AD) (AE) (AF) (AG) (AI) (AJ) (AK) (AN) (AO) (AP) (AR) (AS) (AU) (AV) (AW) (AX) (AZ) (BA)	(AA) (AB) (AC) (AD) (AE) (AF) (AG) (AI) (AJ) (AK) (AL) (AN) (AO) (AP) (AQ) (AR) (AS) (AU) (AV) (AW) (AX) (AY) (AZ) (BA)	(AD)	(AD)	(AD) (AN) (AS) (AV) (BA)	(AA) (AD) (AF) (AG) (AI) (AJ) (AK) (AN) (AO) (AP) (AS) (AU) (AV) (AW) (AZ) (BA)	(AD) (AF) (AJ) (AN) (AO) (AP) (AS) (AU) (AV) (AW) (AZ) (BA)	(AD)	(AA) (AB) (AC) (AD) (AE) (AF) (AG) (AI) (AJ) (AK) (AL) (AN) (AO) (AP) (AQ) (AR) (AS) (AU) (AV) (AW) (AX) (AY) (AZ) (BA)	(AD) (AN) (AS) (AV) (AW) (AZ) (BA)	(AD)	(AD)	(AD) (AF) (AG) (AJ) (AN) (AO) (AP) (AS) (AU) (AV) (AW) (AZ) (BA)	(AA) (AD) (AE) (AF) (AG) (AI) (AJ) (AK) (AN) (AO) (AP) (AR) (AS) (AU) (AV) (AW) (AX) (AZ) (BA)	(AD)	(AD)

## Sheet: Q2_3
Home
Flash Eurobarometer 514
EU’s response to the energy challenges
Fieldwork: 23/11-30/11/2022
VOLUME A (Weighted)
Q2_3 How satisfied or dissatisfied are you with the way the following have reacted to the war in Ukraine? NATO
Base: All
		Country	Country	Country	Country	Country	Country	Country	Country	Country	Country	Country	Country	Country	Country	Country	Country	Country	Country	Country	Country	Country	Country	Country	Country	Country	Country	Country
	EU27	BE	BG	CZ	DK	DE	EE	IE	EL	ES	FR	HR	IT	CY	LV	LT	LU	HU	MT	NL	AT	PL	PT	RO	SI	SK	FI	SE
		(AA)	(AB)	(AC)	(AD)	(AE)	(AF)	(AG)	(AH)	(AI)	(AJ)	(AK)	(AL)	(AM)	(AN)	(AO)	(AP)	(AQ)	(AR)	(AS)	(AT)	(AU)	(AV)	(AW)	(AX)	(AY)	(AZ)	(BA)
Base: Total	26337	1047	1010	1050	1037	1028	1061	1091	1011	1005	1034	1042	1019	502	1050	1035	502	1036	552	1007	1022	1017	1047	1035	1039	1005	1052	1001
Base: Weighted Total	26337	1047	1010	1050	1037	1028	1061	1091	1011	1005	1034	1042	1019	502	1050	1035	502	1036	552	1007	1022	1017	1047	1035	1039	1005	1052	1001
Very satisfied	2747	90	103	93	199	115	98	105	63	64	80	68	74	44	160	144	85	97	40	132	77	174	116	239	65	101	142	128
	10.4	8.6	10.1	8.8	19.2	11.2	9.3	9.6	6.2	6.4	7.7	6.5	7.2	8.8	15.2	13.9	16.8	9.3	7.2	13.1	7.5	17.1	11.1	23	6.2	10.1	13.5	12.8
			(AH) (AI) (AK) (AL) (AX)	(AH) (AI) (AX)	(AA) (AB) (AC) (AE) (AF) (AG) (AH) (AI) (AJ) (AK) (AL) (AM) (AN) (AO) (AQ) (AR) (AS) (AT) (AV) (AX) (AY) (AZ) (BA)	(AH) (AI) (AJ) (AK) (AL) (AR) (AT) (AX)	(AH) (AI) (AK) (AX)	(AH) (AI) (AK) (AX)							(AA) (AB) (AC) (AE) (AF) (AG) (AH) (AI) (AJ) (AK) (AL) (AM) (AQ) (AR) (AT) (AV) (AX) (AY)	(AA) (AB) (AC) (AF) (AG) (AH) (AI) (AJ) (AK) (AL) (AM) (AQ) (AR) (AT) (AX) (AY)	(AA) (AB) (AC) (AE) (AF) (AG) (AH) (AI) (AJ) (AK) (AL) (AM) (AQ) (AR) (AT) (AV) (AX) (AY) (BA)	(AH) (AI) (AK) (AX)		(AA) (AC) (AF) (AG) (AH) (AI) (AJ) (AK) (AL) (AM) (AQ) (AR) (AT) (AX) (AY)		(AA) (AB) (AC) (AE) (AF) (AG) (AH) (AI) (AJ) (AK) (AL) (AM) (AQ) (AR) (AS) (AT) (AV) (AX) (AY) (AZ) (BA)	(AH) (AI) (AJ) (AK) (AL) (AR) (AT) (AX)	(AA) (AB) (AC) (AD) (AE) (AF) (AG) (AH) (AI) (AJ) (AK) (AL) (AM) (AN) (AO) (AP) (AQ) (AR) (AS) (AT) (AU) (AV) (AX) (AY) (AZ) (BA)		(AH) (AI) (AK) (AL) (AT) (AX)	(AA) (AB) (AC) (AF) (AG) (AH) (AI) (AJ) (AK) (AL) (AM) (AQ) (AR) (AT) (AX) (AY)	(AA) (AC) (AF) (AG) (AH) (AI) (AJ) (AK) (AL) (AM) (AQ) (AR) (AT) (AX)
Rather satisfied	10725	429	282	376	485	449	531	353	178	395	459	367	315	86	452	489	215	410	172	490	322	535	518	430	354	302	522	412
	40.7	41	28	35.8	46.8	43.7	50	32.4	17.6	39.3	44.3	35.2	30.9	17.2	43.1	47.3	42.8	39.6	31.1	48.7	31.5	52.6	49.4	41.5	34.1	30.1	49.6	41.2
		(AB) (AC) (AG) (AH) (AK) (AL) (AM) (AR) (AT) (AX) (AY)	(AH) (AM)	(AB) (AH) (AL) (AM) (AT) (AY)	(AA) (AB) (AC) (AG) (AH) (AI) (AK) (AL) (AM) (AQ) (AR) (AT) (AW) (AX) (AY) (BA)	(AB) (AC) (AG) (AH) (AK) (AL) (AM) (AR) (AT) (AX) (AY)	(AA) (AB) (AC) (AE) (AG) (AH) (AI) (AJ) (AK) (AL) (AM) (AN) (AP) (AQ) (AR) (AT) (AW) (AX) (AY) (BA)	(AH) (AM)		(AB) (AG) (AH) (AL) (AM) (AR) (AT) (AX) (AY)	(AB) (AC) (AG) (AH) (AI) (AK) (AL) (AM) (AQ) (AR) (AT) (AX) (AY)	(AB) (AH) (AM) (AY)	(AH) (AM)		(AB) (AC) (AG) (AH) (AK) (AL) (AM) (AR) (AT) (AX) (AY)	(AA) (AB) (AC) (AG) (AH) (AI) (AK) (AL) (AM) (AQ) (AR) (AT) (AW) (AX) (AY) (BA)	(AB) (AC) (AG) (AH) (AK) (AL) (AM) (AR) (AT) (AX) (AY)	(AB) (AG) (AH) (AL) (AM) (AR) (AT) (AX) (AY)	(AH) (AM)	(AA) (AB) (AC) (AE) (AG) (AH) (AI) (AK) (AL) (AM) (AN) (AP) (AQ) (AR) (AT) (AW) (AX) (AY) (BA)	(AH) (AM)	(AA) (AB) (AC) (AD) (AE) (AG) (AH) (AI) (AJ) (AK) (AL) (AM) (AN) (AO) (AP) (AQ) (AR) (AT) (AW) (AX) (AY) (BA)	(AA) (AB) (AC) (AE) (AG) (AH) (AI) (AJ) (AK) (AL) (AM) (AN) (AP) (AQ) (AR) (AT) (AW) (AX) (AY) (BA)	(AB) (AC) (AG) (AH) (AK) (AL) (AM) (AR) (AT) (AX) (AY)	(AB) (AH) (AM)	(AH) (AM)	(AA) (AB) (AC) (AE) (AG) (AH) (AI) (AJ) (AK) (AL) (AM) (AN) (AP) (AQ) (AR) (AT) (AW) (AX) (AY) (BA)	(AB) (AC) (AG) (AH) (AK) (AL) (AM) (AR) (AT) (AX) (AY)
Rather not satisfied	6039	225	258	269	148	208	221	236	206	274	210	327	338	121	229	241	97	232	136	180	277	170	260	174	287	196	234	226
	22.9	21.5	25.6	25.6	14.2	20.2	20.8	21.7	20.4	27.2	20.3	31.4	33.2	24.1	21.8	23.3	19.3	22.4	24.7	17.8	27.1	16.7	24.8	16.8	27.7	19.5	22.3	22.6
		(AD) (AS) (AU) (AW)	(AD) (AE) (AF) (AH) (AJ) (AP) (AS) (AU) (AW) (AY)	(AA) (AD) (AE) (AF) (AG) (AH) (AJ) (AP) (AS) (AU) (AW) (AY)		(AD) (AU)	(AD) (AU) (AW)	(AD) (AS) (AU) (AW)	(AD) (AU)	(AA) (AD) (AE) (AF) (AG) (AH) (AJ) (AN) (AP) (AQ) (AS) (AU) (AW) (AY) (AZ) (BA)	(AD) (AU)	(AA) (AB) (AC) (AD) (AE) (AF) (AG) (AH) (AJ) (AM) (AN) (AO) (AP) (AQ) (AR) (AS) (AT) (AU) (AV) (AW) (AY) (AZ) (BA)	(AA) (AB) (AC) (AD) (AE) (AF) (AG) (AH) (AI) (AJ) (AM) (AN) (AO) (AP) (AQ) (AR) (AS) (AT) (AU) (AV) (AW) (AX) (AY) (AZ) (BA)	(AD) (AS) (AU) (AW)	(AD) (AS) (AU) (AW)	(AD) (AS) (AU) (AW)	(AD)	(AD) (AS) (AU) (AW)	(AD) (AS) (AU) (AW) (AY)	(AD)	(AA) (AD) (AE) (AF) (AG) (AH) (AJ) (AN) (AP) (AQ) (AS) (AU) (AW) (AY) (AZ) (BA)		(AD) (AE) (AH) (AJ) (AP) (AS) (AU) (AW) (AY)		(AA) (AD) (AE) (AF) (AG) (AH) (AJ) (AN) (AO) (AP) (AQ) (AS) (AU) (AW) (AY) (AZ) (BA)	(AD)	(AD) (AS) (AU) (AW)	(AD) (AS) (AU) (AW)
Not at all satisfied	4245	166	256	212	61	148	115	268	504	193	143	163	216	209	106	84	58	173	142	87	235	62	97	135	221	299	65	106
	16.1	15.8	25.4	20.1	5.9	14.4	10.8	24.5	49.9	19.2	13.9	15.6	21.2	41.6	10.1	8.1	11.5	16.7	25.6	8.7	23	6.1	9.3	13	21.3	29.8	6.2	10.6
		(AD) (AF) (AN) (AO) (AP) (AS) (AU) (AV) (AZ) (BA)	(AA) (AC) (AD) (AE) (AF) (AI) (AJ) (AK) (AN) (AO) (AP) (AQ) (AS) (AU) (AV) (AW) (AZ) (BA)	(AA) (AD) (AE) (AF) (AJ) (AK) (AN) (AO) (AP) (AS) (AU) (AV) (AW) (AZ) (BA)		(AD) (AF) (AN) (AO) (AS) (AU) (AV) (AZ) (BA)	(AD) (AU) (AZ)	(AA) (AC) (AD) (AE) (AF) (AI) (AJ) (AK) (AN) (AO) (AP) (AQ) (AS) (AU) (AV) (AW) (AZ) (BA)	(AA) (AB) (AC) (AD) (AE) (AF) (AG) (AI) (AJ) (AK) (AL) (AM) (AN) (AO) (AP) (AQ) (AR) (AS) (AT) (AU) (AV) (AW) (AX) (AY) (AZ) (BA)	(AD) (AE) (AF) (AJ) (AK) (AN) (AO) (AP) (AS) (AU) (AV) (AW) (AZ) (BA)	(AD) (AF) (AN) (AO) (AS) (AU) (AV) (AZ) (BA)	(AD) (AF) (AN) (AO) (AP) (AS) (AU) (AV) (AZ) (BA)	(AA) (AD) (AE) (AF) (AJ) (AK) (AN) (AO) (AP) (AQ) (AS) (AU) (AV) (AW) (AZ) (BA)	(AA) (AB) (AC) (AD) (AE) (AF) (AG) (AI) (AJ) (AK) (AL) (AN) (AO) (AP) (AQ) (AR) (AS) (AT) (AU) (AV) (AW) (AX) (AY) (AZ) (BA)	(AD) (AU) (AZ)		(AD) (AU) (AZ)	(AD) (AF) (AN) (AO) (AP) (AS) (AU) (AV) (AW) (AZ) (BA)	(AA) (AC) (AD) (AE) (AF) (AI) (AJ) (AK) (AN) (AO) (AP) (AQ) (AS) (AU) (AV) (AW) (AZ) (BA)	(AD) (AU) (AZ)	(AA) (AD) (AE) (AF) (AI) (AJ) (AK) (AN) (AO) (AP) (AQ) (AS) (AU) (AV) (AW) (AZ) (BA)		(AD) (AU) (AZ)	(AD) (AO) (AS) (AU) (AV) (AZ)	(AA) (AD) (AE) (AF) (AJ) (AK) (AN) (AO) (AP) (AQ) (AS) (AU) (AV) (AW) (AZ) (BA)	(AA) (AC) (AD) (AE) (AF) (AG) (AI) (AJ) (AK) (AL) (AN) (AO) (AP) (AQ) (AS) (AT) (AU) (AV) (AW) (AX) (AZ) (BA)		(AD) (AU) (AZ)
Don’t know	2581	137	111	101	144	108	96	128	60	79	142	117	77	42	102	76	48	124	63	117	111	76	56	58	112	107	89	129
	9.8	13.1	10.9	9.7	13.9	10.5	9.1	11.8	5.9	7.9	13.8	11.2	7.5	8.4	9.7	7.4	9.6	11.9	11.4	11.7	10.9	7.5	5.4	5.6	10.7	10.6	8.4	12.9
		(AC) (AF) (AH) (AI) (AL) (AM) (AN) (AO) (AU) (AV) (AW) (AZ)	(AH) (AI) (AL) (AO) (AU) (AV) (AW)	(AH) (AV) (AW)	(AC) (AE) (AF) (AH) (AI) (AL) (AM) (AN) (AO) (AP) (AT) (AU) (AV) (AW) (AX) (AY) (AZ)	(AH) (AL) (AO) (AU) (AV) (AW)	(AH) (AV) (AW)	(AH) (AI) (AL) (AO) (AU) (AV) (AW) (AZ)		(AV)	(AC) (AE) (AF) (AH) (AI) (AL) (AM) (AN) (AO) (AP) (AU) (AV) (AW) (AX) (AY) (AZ)	(AH) (AI) (AL) (AO) (AU) (AV) (AW) (AZ)		(AV)	(AH) (AV) (AW)		(AH) (AV) (AW)	(AF) (AH) (AI) (AL) (AM) (AO) (AU) (AV) (AW) (AZ)	(AH) (AI) (AL) (AO) (AU) (AV) (AW)	(AH) (AI) (AL) (AO) (AU) (AV) (AW) (AZ)	(AH) (AI) (AL) (AO) (AU) (AV) (AW)				(AH) (AI) (AL) (AO) (AU) (AV) (AW)	(AH) (AI) (AL) (AO) (AU) (AV) (AW)	(AH) (AV) (AW)	(AC) (AF) (AH) (AI) (AL) (AM) (AN) (AO) (AU) (AV) (AW) (AZ)
Total 'Satisfied'	13472	519	385	468	684	564	629	458	241	459	538	435	389	130	612	633	299	507	211	623	399	709	634	668	419	404	664	540
	51.2	49.6	38.1	44.6	66	54.9	59.3	42	23.9	45.7	52.1	41.7	38.1	26	58.3	61.2	59.6	48.9	38.3	61.8	39	69.7	60.5	64.6	40.3	40.1	63.1	54
		(AB) (AC) (AG) (AH) (AK) (AL) (AM) (AR) (AT) (AX) (AY)	(AH) (AM)	(AB) (AH) (AL) (AM) (AR) (AT)	(AA) (AB) (AC) (AE) (AF) (AG) (AH) (AI) (AJ) (AK) (AL) (AM) (AN) (AO) (AP) (AQ) (AR) (AT) (AV) (AX) (AY) (BA)	(AA) (AB) (AC) (AG) (AH) (AI) (AK) (AL) (AM) (AQ) (AR) (AT) (AX) (AY)	(AA) (AB) (AC) (AG) (AH) (AI) (AJ) (AK) (AL) (AM) (AQ) (AR) (AT) (AX) (AY) (BA)	(AH) (AM)		(AB) (AH) (AL) (AM) (AR) (AT) (AX) (AY)	(AB) (AC) (AG) (AH) (AI) (AK) (AL) (AM) (AR) (AT) (AX) (AY)	(AH) (AM)	(AH) (AM)		(AA) (AB) (AC) (AG) (AH) (AI) (AJ) (AK) (AL) (AM) (AQ) (AR) (AT) (AX) (AY)	(AA) (AB) (AC) (AE) (AG) (AH) (AI) (AJ) (AK) (AL) (AM) (AQ) (AR) (AT) (AX) (AY) (BA)	(AA) (AB) (AC) (AG) (AH) (AI) (AJ) (AK) (AL) (AM) (AQ) (AR) (AT) (AX) (AY) (BA)	(AB) (AG) (AH) (AK) (AL) (AM) (AR) (AT) (AX) (AY)	(AH) (AM)	(AA) (AB) (AC) (AE) (AG) (AH) (AI) (AJ) (AK) (AL) (AM) (AQ) (AR) (AT) (AX) (AY) (BA)	(AH) (AM)	(AA) (AB) (AC) (AE) (AF) (AG) (AH) (AI) (AJ) (AK) (AL) (AM) (AN) (AO) (AP) (AQ) (AR) (AS) (AT) (AV) (AW) (AX) (AY) (AZ) (BA)	(AA) (AB) (AC) (AE) (AG) (AH) (AI) (AJ) (AK) (AL) (AM) (AQ) (AR) (AT) (AX) (AY) (BA)	(AA) (AB) (AC) (AE) (AF) (AG) (AH) (AI) (AJ) (AK) (AL) (AM) (AN) (AQ) (AR) (AT) (AX) (AY) (BA)	(AH) (AM)	(AH) (AM)	(AA) (AB) (AC) (AE) (AG) (AH) (AI) (AJ) (AK) (AL) (AM) (AN) (AQ) (AR) (AT) (AX) (AY) (BA)	(AA) (AB) (AC) (AG) (AH) (AI) (AK) (AL) (AM) (AQ) (AR) (AT) (AX) (AY)
Total 'Not satisfied'	10284	391	514	480	209	356	336	504	710	467	353	490	554	330	336	326	154	406	278	267	512	232	357	309	508	495	299	332
	39	37.3	50.9	45.7	20.2	34.6	31.6	46.2	70.2	46.5	34.2	47	54.3	65.7	32	31.5	30.8	39.2	50.3	26.5	50.1	22.8	34.1	29.8	48.9	49.2	28.4	33.2
		(AD) (AF) (AN) (AO) (AP) (AS) (AU) (AW) (AZ)	(AA) (AC) (AD) (AE) (AF) (AJ) (AN) (AO) (AP) (AQ) (AS) (AU) (AV) (AW) (AZ) (BA)	(AA) (AD) (AE) (AF) (AJ) (AN) (AO) (AP) (AQ) (AS) (AU) (AV) (AW) (AZ) (BA)		(AD) (AS) (AU) (AW) (AZ)	(AD) (AS) (AU)	(AA) (AD) (AE) (AF) (AJ) (AN) (AO) (AP) (AQ) (AS) (AU) (AV) (AW) (AZ) (BA)	(AA) (AB) (AC) (AD) (AE) (AF) (AG) (AI) (AJ) (AK) (AL) (AN) (AO) (AP) (AQ) (AR) (AS) (AT) (AU) (AV) (AW) (AX) (AY) (AZ) (BA)	(AA) (AD) (AE) (AF) (AJ) (AN) (AO) (AP) (AQ) (AS) (AU) (AV) (AW) (AZ) (BA)	(AD) (AS) (AU) (AZ)	(AA) (AD) (AE) (AF) (AJ) (AN) (AO) (AP) (AQ) (AS) (AU) (AV) (AW) (AZ) (BA)	(AA) (AC) (AD) (AE) (AF) (AG) (AI) (AJ) (AK) (AN) (AO) (AP) (AQ) (AS) (AU) (AV) (AW) (AX) (AY) (AZ) (BA)	(AA) (AB) (AC) (AD) (AE) (AF) (AG) (AI) (AJ) (AK) (AL) (AN) (AO) (AP) (AQ) (AR) (AS) (AT) (AU) (AV) (AW) (AX) (AY) (AZ) (BA)	(AD) (AS) (AU)	(AD) (AS) (AU)	(AD) (AU)	(AD) (AE) (AF) (AJ) (AN) (AO) (AP) (AS) (AU) (AV) (AW) (AZ) (BA)	(AA) (AD) (AE) (AF) (AJ) (AN) (AO) (AP) (AQ) (AS) (AU) (AV) (AW) (AZ) (BA)	(AD)	(AA) (AD) (AE) (AF) (AJ) (AN) (AO) (AP) (AQ) (AS) (AU) (AV) (AW) (AZ) (BA)		(AD) (AS) (AU) (AZ)	(AD) (AU)	(AA) (AD) (AE) (AF) (AJ) (AN) (AO) (AP) (AQ) (AS) (AU) (AV) (AW) (AZ) (BA)	(AA) (AD) (AE) (AF) (AJ) (AN) (AO) (AP) (AQ) (AS) (AU) (AV) (AW) (AZ) (BA)	(AD) (AU)	(AD) (AS) (AU) (AZ)

## Sheet: Q2_4
Home
Flash Eurobarometer 514
EU’s response to the energy challenges
Fieldwork: 23/11-30/11/2022
VOLUME A (Weighted)
Q2_4 How satisfied or dissatisfied are you with the way the following have reacted to the war in Ukraine? Citizens in (OUR COUNTRY)
Base: All
		Country	Country	Country	Country	Country	Country	Country	Country	Country	Country	Country	Country	Country	Country	Country	Country	Country	Country	Country	Country	Country	Country	Country	Country	Country	Country	Country
	EU27	BE	BG	CZ	DK	DE	EE	IE	EL	ES	FR	HR	IT	CY	LV	LT	LU	HU	MT	NL	AT	PL	PT	RO	SI	SK	FI	SE
		(AA)	(AB)	(AC)	(AD)	(AE)	(AF)	(AG)	(AH)	(AI)	(AJ)	(AK)	(AL)	(AM)	(AN)	(AO)	(AP)	(AQ)	(AR)	(AS)	(AT)	(AU)	(AV)	(AW)	(AX)	(AY)	(AZ)	(BA)
Base: Total	26337	1047	1010	1050	1037	1028	1061	1091	1011	1005	1034	1042	1019	502	1050	1035	502	1036	552	1007	1022	1017	1047	1035	1039	1005	1052	1001
Base: Weighted Total	26337	1047	1010	1050	1037	1028	1061	1091	1011	1005	1034	1042	1019	502	1050	1035	502	1036	552	1007	1022	1017	1047	1035	1039	1005	1052	1001
Very satisfied	3195	78	71	85	261	89	158	225	82	113	75	90	51	60	150	193	56	75	49	78	103	391	152	269	79	17	225	137
	12.1	7.5	7	8.1	25.2	8.7	14.9	20.6	8.1	11.2	7.2	8.6	5	11.9	14.3	18.6	11.2	7.3	8.9	7.8	10.1	38.5	14.5	26	7.6	1.7	21.4	13.7
		(AL) (AY)	(AY)	(AL) (AY)	(AA) (AB) (AC) (AE) (AF) (AG) (AH) (AI) (AJ) (AK) (AL) (AM) (AN) (AO) (AP) (AQ) (AR) (AS) (AT) (AV) (AX) (AY) (AZ) (BA)	(AL) (AY)	(AA) (AB) (AC) (AE) (AH) (AI) (AJ) (AK) (AL) (AQ) (AR) (AS) (AT) (AX) (AY)	(AA) (AB) (AC) (AE) (AF) (AH) (AI) (AJ) (AK) (AL) (AM) (AN) (AP) (AQ) (AR) (AS) (AT) (AV) (AX) (AY) (BA)	(AL) (AY)	(AA) (AB) (AC) (AH) (AJ) (AL) (AQ) (AS) (AX) (AY)	(AL) (AY)	(AL) (AY)	(AY)	(AA) (AB) (AC) (AH) (AJ) (AL) (AQ) (AS) (AX) (AY)	(AA) (AB) (AC) (AE) (AH) (AJ) (AK) (AL) (AQ) (AR) (AS) (AT) (AX) (AY)	(AA) (AB) (AC) (AE) (AF) (AH) (AI) (AJ) (AK) (AL) (AM) (AN) (AP) (AQ) (AR) (AS) (AT) (AV) (AX) (AY) (BA)	(AA) (AB) (AJ) (AL) (AQ) (AS) (AX) (AY)	(AL) (AY)	(AL) (AY)	(AL) (AY)	(AA) (AB) (AJ) (AL) (AQ) (AY)	(AA) (AB) (AC) (AD) (AE) (AF) (AG) (AH) (AI) (AJ) (AK) (AL) (AM) (AN) (AO) (AP) (AQ) (AR) (AS) (AT) (AV) (AW) (AX) (AY) (AZ) (BA)	(AA) (AB) (AC) (AE) (AH) (AI) (AJ) (AK) (AL) (AQ) (AR) (AS) (AT) (AX) (AY)	(AA) (AB) (AC) (AE) (AF) (AG) (AH) (AI) (AJ) (AK) (AL) (AM) (AN) (AO) (AP) (AQ) (AR) (AS) (AT) (AV) (AX) (AY) (AZ) (BA)	(AL) (AY)		(AA) (AB) (AC) (AE) (AF) (AH) (AI) (AJ) (AK) (AL) (AM) (AN) (AP) (AQ) (AR) (AS) (AT) (AV) (AX) (AY) (BA)	(AA) (AB) (AC) (AE) (AH) (AJ) (AK) (AL) (AQ) (AR) (AS) (AT) (AX) (AY)
Rather satisfied	12428	512	367	445	565	478	639	485	386	510	529	546	422	178	549	595	240	396	218	586	423	456	612	462	470	316	631	553
	47.2	48.9	36.4	42.3	54.4	46.5	60.3	44.4	38.2	50.7	51.1	52.4	41.4	35.4	52.3	57.5	47.9	38.2	39.6	58.2	41.4	44.9	58.4	44.6	45.2	31.4	60	55.3
		(AB) (AC) (AH) (AL) (AM) (AQ) (AR) (AT) (AY)	(AY)	(AB) (AM) (AY)	(AA) (AB) (AC) (AE) (AG) (AH) (AL) (AM) (AP) (AQ) (AR) (AT) (AU) (AW) (AX) (AY)	(AB) (AH) (AL) (AM) (AQ) (AR) (AT) (AY)	(AA) (AB) (AC) (AD) (AE) (AG) (AH) (AI) (AJ) (AK) (AL) (AM) (AN) (AP) (AQ) (AR) (AT) (AU) (AW) (AX) (AY) (BA)	(AB) (AH) (AM) (AQ) (AY)	(AY)	(AB) (AC) (AG) (AH) (AL) (AM) (AQ) (AR) (AT) (AU) (AW) (AX) (AY)	(AB) (AC) (AE) (AG) (AH) (AL) (AM) (AQ) (AR) (AT) (AU) (AW) (AX) (AY)	(AB) (AC) (AE) (AG) (AH) (AL) (AM) (AQ) (AR) (AT) (AU) (AW) (AX) (AY)	(AB) (AM) (AY)		(AB) (AC) (AE) (AG) (AH) (AL) (AM) (AQ) (AR) (AT) (AU) (AW) (AX) (AY)	(AA) (AB) (AC) (AE) (AG) (AH) (AI) (AJ) (AK) (AL) (AM) (AN) (AP) (AQ) (AR) (AT) (AU) (AW) (AX) (AY)	(AB) (AH) (AL) (AM) (AQ) (AR) (AT) (AY)	(AY)	(AY)	(AA) (AB) (AC) (AE) (AG) (AH) (AI) (AJ) (AK) (AL) (AM) (AN) (AP) (AQ) (AR) (AT) (AU) (AW) (AX) (AY)	(AB) (AM) (AY)	(AB) (AH) (AM) (AQ) (AY)	(AA) (AB) (AC) (AE) (AG) (AH) (AI) (AJ) (AK) (AL) (AM) (AN) (AP) (AQ) (AR) (AT) (AU) (AW) (AX) (AY)	(AB) (AH) (AM) (AQ) (AY)	(AB) (AH) (AM) (AQ) (AY)		(AA) (AB) (AC) (AD) (AE) (AG) (AH) (AI) (AJ) (AK) (AL) (AM) (AN) (AP) (AQ) (AR) (AT) (AU) (AW) (AX) (AY) (BA)	(AA) (AB) (AC) (AE) (AG) (AH) (AI) (AL) (AM) (AP) (AQ) (AR) (AT) (AU) (AW) (AX) (AY)
Rather not satisfied	5525	193	336	312	79	219	139	164	279	193	187	221	337	121	198	138	78	322	128	160	271	88	171	168	250	374	102	156
	21	18.4	33.3	29.7	7.6	21.3	13.1	15.1	27.6	19.2	18.1	21.2	33	24.1	18.9	13.3	15.6	31.1	23.1	15.9	26.5	8.7	16.4	16.2	24.1	37.3	9.7	15.6
		(AD) (AF) (AG) (AO) (AU) (AZ)	(AA) (AD) (AE) (AF) (AG) (AH) (AI) (AJ) (AK) (AM) (AN) (AO) (AP) (AR) (AS) (AT) (AU) (AV) (AW) (AX) (AZ) (BA)	(AA) (AD) (AE) (AF) (AG) (AI) (AJ) (AK) (AM) (AN) (AO) (AP) (AR) (AS) (AU) (AV) (AW) (AX) (AZ) (BA)		(AD) (AF) (AG) (AO) (AP) (AS) (AU) (AV) (AW) (AZ) (BA)	(AD) (AU) (AZ)	(AD) (AU) (AZ)	(AA) (AD) (AE) (AF) (AG) (AI) (AJ) (AK) (AN) (AO) (AP) (AS) (AU) (AV) (AW) (AZ) (BA)	(AD) (AF) (AG) (AO) (AU) (AZ) (BA)	(AD) (AF) (AO) (AU) (AZ)	(AD) (AF) (AG) (AO) (AP) (AS) (AU) (AV) (AW) (AZ) (BA)	(AA) (AD) (AE) (AF) (AG) (AH) (AI) (AJ) (AK) (AM) (AN) (AO) (AP) (AR) (AS) (AT) (AU) (AV) (AW) (AX) (AZ) (BA)	(AA) (AD) (AF) (AG) (AI) (AJ) (AN) (AO) (AP) (AS) (AU) (AV) (AW) (AZ) (BA)	(AD) (AF) (AG) (AO) (AU) (AZ)	(AD) (AU) (AZ)	(AD) (AU) (AZ)	(AA) (AD) (AE) (AF) (AG) (AI) (AJ) (AK) (AM) (AN) (AO) (AP) (AR) (AS) (AT) (AU) (AV) (AW) (AX) (AZ) (BA)	(AA) (AD) (AF) (AG) (AJ) (AO) (AP) (AS) (AU) (AV) (AW) (AZ) (BA)	(AD) (AU) (AZ)	(AA) (AD) (AE) (AF) (AG) (AI) (AJ) (AK) (AN) (AO) (AP) (AS) (AU) (AV) (AW) (AZ) (BA)		(AD) (AU) (AZ)	(AD) (AU) (AZ)	(AA) (AD) (AF) (AG) (AI) (AJ) (AN) (AO) (AP) (AS) (AU) (AV) (AW) (AZ) (BA)	(AA) (AC) (AD) (AE) (AF) (AG) (AH) (AI) (AJ) (AK) (AM) (AN) (AO) (AP) (AQ) (AR) (AS) (AT) (AU) (AV) (AW) (AX) (AZ) (BA)		(AD) (AU) (AZ)
Not at all satisfied	2245	91	131	126	31	106	41	126	172	81	76	50	108	76	61	36	33	124	71	57	95	42	39	74	96	173	31	38
	8.5	8.7	13	12	3	10.3	3.9	11.5	17	8	7.3	4.8	10.6	15.1	5.8	3.4	6.6	12	12.8	5.7	9.3	4.1	3.7	7.1	9.3	17.2	3	3.8
		(AD) (AF) (AK) (AN) (AO) (AS) (AU) (AV) (AZ) (BA)	(AA) (AD) (AF) (AI) (AJ) (AK) (AN) (AO) (AP) (AS) (AT) (AU) (AV) (AW) (AX) (AZ) (BA)	(AA) (AD) (AF) (AI) (AJ) (AK) (AN) (AO) (AP) (AS) (AU) (AV) (AW) (AZ) (BA)		(AD) (AF) (AJ) (AK) (AN) (AO) (AP) (AS) (AU) (AV) (AW) (AZ) (BA)		(AA) (AD) (AF) (AI) (AJ) (AK) (AN) (AO) (AP) (AS) (AU) (AV) (AW) (AZ) (BA)	(AA) (AB) (AC) (AD) (AE) (AF) (AG) (AI) (AJ) (AK) (AL) (AN) (AO) (AP) (AQ) (AS) (AT) (AU) (AV) (AW) (AX) (AZ) (BA)	(AD) (AF) (AK) (AO) (AS) (AU) (AV) (AZ) (BA)	(AD) (AF) (AK) (AO) (AU) (AV) (AZ) (BA)	(AD) (AZ)	(AD) (AF) (AJ) (AK) (AN) (AO) (AP) (AS) (AU) (AV) (AW) (AZ) (BA)	(AA) (AD) (AE) (AF) (AI) (AJ) (AK) (AL) (AN) (AO) (AP) (AS) (AT) (AU) (AV) (AW) (AX) (AZ) (BA)	(AD) (AO) (AV) (AZ) (BA)		(AD) (AF) (AO) (AU) (AV) (AZ) (BA)	(AA) (AD) (AF) (AI) (AJ) (AK) (AN) (AO) (AP) (AS) (AU) (AV) (AW) (AZ) (BA)	(AA) (AD) (AF) (AI) (AJ) (AK) (AN) (AO) (AP) (AS) (AT) (AU) (AV) (AW) (AX) (AZ) (BA)	(AD) (AO) (AZ)	(AD) (AF) (AK) (AN) (AO) (AS) (AU) (AV) (AZ) (BA)			(AD) (AF) (AK) (AO) (AU) (AV) (AZ) (BA)	(AD) (AF) (AK) (AN) (AO) (AS) (AU) (AV) (AZ) (BA)	(AA) (AB) (AC) (AD) (AE) (AF) (AG) (AI) (AJ) (AK) (AL) (AN) (AO) (AP) (AQ) (AR) (AS) (AT) (AU) (AV) (AW) (AX) (AZ) (BA)
Don’t know	2943	173	105	82	101	135	83	91	92	109	168	136	102	68	91	74	94	119	86	126	130	39	73	63	144	125	63	116
	11.2	16.5	10.4	7.9	9.7	13.2	7.8	8.4	9.1	10.9	16.2	13.1	10.1	13.5	8.7	7.1	18.7	11.5	15.6	12.5	12.7	3.8	7	6.1	13.9	12.4	6	11.6
		(AB) (AC) (AD) (AE) (AF) (AG) (AH) (AI) (AK) (AL) (AN) (AO) (AQ) (AS) (AT) (AU) (AV) (AW) (AY) (AZ) (BA)	(AO) (AU) (AV) (AW) (AZ)	(AU)	(AU) (AV) (AW) (AZ)	(AC) (AD) (AF) (AG) (AH) (AL) (AN) (AO) (AU) (AV) (AW) (AZ)	(AU)	(AU) (AZ)	(AU) (AW) (AZ)	(AC) (AF) (AO) (AU) (AV) (AW) (AZ)	(AB) (AC) (AD) (AF) (AG) (AH) (AI) (AL) (AN) (AO) (AQ) (AS) (AT) (AU) (AV) (AW) (AY) (AZ) (BA)	(AC) (AD) (AF) (AG) (AH) (AL) (AN) (AO) (AU) (AV) (AW) (AZ)	(AO) (AU) (AV) (AW) (AZ)	(AC) (AD) (AF) (AG) (AH) (AN) (AO) (AU) (AV) (AW) (AZ)	(AU) (AW) (AZ)	(AU)	(AB) (AC) (AD) (AE) (AF) (AG) (AH) (AI) (AK) (AL) (AM) (AN) (AO) (AQ) (AS) (AT) (AU) (AV) (AW) (AX) (AY) (AZ) (BA)	(AC) (AF) (AG) (AO) (AU) (AV) (AW) (AZ)	(AB) (AC) (AD) (AF) (AG) (AH) (AI) (AL) (AN) (AO) (AQ) (AU) (AV) (AW) (AZ) (BA)	(AC) (AD) (AF) (AG) (AH) (AN) (AO) (AU) (AV) (AW) (AZ)	(AC) (AD) (AF) (AG) (AH) (AN) (AO) (AU) (AV) (AW) (AZ)		(AU)	(AU)	(AB) (AC) (AD) (AF) (AG) (AH) (AL) (AN) (AO) (AU) (AV) (AW) (AZ)	(AC) (AF) (AG) (AH) (AN) (AO) (AU) (AV) (AW) (AZ)	(AU)	(AC) (AF) (AG) (AN) (AO) (AU) (AV) (AW) (AZ)
Total 'Satisfied'	15624	590	438	530	826	568	798	709	468	623	604	635	472	237	699	788	297	471	267	664	526	848	764	731	548	333	856	691
	59.3	56.4	43.4	50.5	79.6	55.2	75.2	65	46.3	61.9	58.4	61	46.3	47.3	66.6	76.1	59.1	45.5	48.4	65.9	51.5	83.3	73	70.6	52.8	33.1	81.4	69
		(AB) (AC) (AH) (AL) (AM) (AQ) (AR) (AT) (AY)	(AY)	(AB) (AQ) (AY)	(AA) (AB) (AC) (AE) (AF) (AG) (AH) (AI) (AJ) (AK) (AL) (AM) (AN) (AP) (AQ) (AR) (AS) (AT) (AV) (AW) (AX) (AY) (BA)	(AB) (AC) (AH) (AL) (AM) (AQ) (AR) (AY)	(AA) (AB) (AC) (AE) (AG) (AH) (AI) (AJ) (AK) (AL) (AM) (AN) (AP) (AQ) (AR) (AS) (AT) (AW) (AX) (AY) (BA)	(AA) (AB) (AC) (AE) (AH) (AJ) (AL) (AM) (AP) (AQ) (AR) (AT) (AX) (AY)	(AY)	(AA) (AB) (AC) (AE) (AH) (AL) (AM) (AQ) (AR) (AT) (AX) (AY)	(AB) (AC) (AH) (AL) (AM) (AQ) (AR) (AT) (AX) (AY)	(AA) (AB) (AC) (AE) (AH) (AL) (AM) (AQ) (AR) (AT) (AX) (AY)	(AY)	(AY)	(AA) (AB) (AC) (AE) (AH) (AI) (AJ) (AK) (AL) (AM) (AP) (AQ) (AR) (AT) (AX) (AY)	(AA) (AB) (AC) (AE) (AG) (AH) (AI) (AJ) (AK) (AL) (AM) (AN) (AP) (AQ) (AR) (AS) (AT) (AW) (AX) (AY) (BA)	(AB) (AC) (AH) (AL) (AM) (AQ) (AR) (AT) (AX) (AY)	(AY)	(AY)	(AA) (AB) (AC) (AE) (AH) (AJ) (AK) (AL) (AM) (AP) (AQ) (AR) (AT) (AX) (AY)	(AB) (AH) (AL) (AQ) (AY)	(AA) (AB) (AC) (AD) (AE) (AF) (AG) (AH) (AI) (AJ) (AK) (AL) (AM) (AN) (AO) (AP) (AQ) (AR) (AS) (AT) (AV) (AW) (AX) (AY) (BA)	(AA) (AB) (AC) (AE) (AG) (AH) (AI) (AJ) (AK) (AL) (AM) (AN) (AP) (AQ) (AR) (AS) (AT) (AX) (AY)	(AA) (AB) (AC) (AE) (AG) (AH) (AI) (AJ) (AK) (AL) (AM) (AP) (AQ) (AR) (AS) (AT) (AX) (AY)	(AB) (AH) (AL) (AQ) (AY)		(AA) (AB) (AC) (AE) (AF) (AG) (AH) (AI) (AJ) (AK) (AL) (AM) (AN) (AO) (AP) (AQ) (AR) (AS) (AT) (AV) (AW) (AX) (AY) (BA)	(AA) (AB) (AC) (AE) (AH) (AI) (AJ) (AK) (AL) (AM) (AP) (AQ) (AR) (AT) (AX) (AY)
Total 'Not satisfied'	7771	284	467	438	110	325	180	290	450	273	263	271	444	197	260	173	112	446	198	217	366	130	210	241	347	547	133	195
	29.5	27.1	46.3	41.7	10.6	31.6	17	26.6	44.5	27.2	25.4	26	43.6	39.2	24.7	16.7	22.2	43.1	35.9	21.5	35.8	12.8	20.1	23.3	33.4	54.5	12.7	19.4
		(AD) (AF) (AO) (AP) (AS) (AU) (AV) (AZ) (BA)	(AA) (AD) (AE) (AF) (AG) (AI) (AJ) (AK) (AM) (AN) (AO) (AP) (AR) (AS) (AT) (AU) (AV) (AW) (AX) (AZ) (BA)	(AA) (AD) (AE) (AF) (AG) (AI) (AJ) (AK) (AN) (AO) (AP) (AR) (AS) (AT) (AU) (AV) (AW) (AX) (AZ) (BA)		(AA) (AD) (AF) (AG) (AI) (AJ) (AK) (AN) (AO) (AP) (AS) (AU) (AV) (AW) (AZ) (BA)	(AD) (AU) (AZ)	(AD) (AF) (AO) (AS) (AU) (AV) (AZ) (BA)	(AA) (AD) (AE) (AF) (AG) (AI) (AJ) (AK) (AN) (AO) (AP) (AR) (AS) (AT) (AU) (AV) (AW) (AX) (AZ) (BA)	(AD) (AF) (AO) (AS) (AU) (AV) (AZ) (BA)	(AD) (AF) (AO) (AS) (AU) (AV) (AZ) (BA)	(AD) (AF) (AO) (AS) (AU) (AV) (AZ) (BA)	(AA) (AD) (AE) (AF) (AG) (AI) (AJ) (AK) (AN) (AO) (AP) (AR) (AS) (AT) (AU) (AV) (AW) (AX) (AZ) (BA)	(AA) (AD) (AE) (AF) (AG) (AI) (AJ) (AK) (AN) (AO) (AP) (AS) (AU) (AV) (AW) (AX) (AZ) (BA)	(AD) (AF) (AO) (AU) (AV) (AZ) (BA)	(AD) (AU) (AZ)	(AD) (AF) (AO) (AU) (AZ)	(AA) (AD) (AE) (AF) (AG) (AI) (AJ) (AK) (AN) (AO) (AP) (AR) (AS) (AT) (AU) (AV) (AW) (AX) (AZ) (BA)	(AA) (AD) (AF) (AG) (AI) (AJ) (AK) (AN) (AO) (AP) (AS) (AU) (AV) (AW) (AZ) (BA)	(AD) (AF) (AO) (AU) (AZ)	(AA) (AD) (AF) (AG) (AI) (AJ) (AK) (AN) (AO) (AP) (AS) (AU) (AV) (AW) (AZ) (BA)		(AD) (AU) (AZ)	(AD) (AF) (AO) (AU) (AZ) (BA)	(AA) (AD) (AF) (AG) (AI) (AJ) (AK) (AN) (AO) (AP) (AS) (AU) (AV) (AW) (AZ) (BA)	(AA) (AB) (AC) (AD) (AE) (AF) (AG) (AH) (AI) (AJ) (AK) (AL) (AM) (AN) (AO) (AP) (AQ) (AR) (AS) (AT) (AU) (AV) (AW) (AX) (AZ) (BA)		(AD) (AU) (AZ)

## Sheet: Q3_1
Home
Flash Eurobarometer 514
EU’s response to the energy challenges
Fieldwork: 23/11-30/11/2022
VOLUME A (Weighted)
Q3_1 For each of the following measures that have been announced, please tell me if you approve of them or not. Economic sanctions against the Russian government, companies and individuals
Base: All
		Country	Country	Country	Country	Country	Country	Country	Country	Country	Country	Country	Country	Country	Country	Country	Country	Country	Country	Country	Country	Country	Country	Country	Country	Country	Country	Country
	EU27	BE	BG	CZ	DK	DE	EE	IE	EL	ES	FR	HR	IT	CY	LV	LT	LU	HU	MT	NL	AT	PL	PT	RO	SI	SK	FI	SE
		(AA)	(AB)	(AC)	(AD)	(AE)	(AF)	(AG)	(AH)	(AI)	(AJ)	(AK)	(AL)	(AM)	(AN)	(AO)	(AP)	(AQ)	(AR)	(AS)	(AT)	(AU)	(AV)	(AW)	(AX)	(AY)	(AZ)	(BA)
Base: Total	26337	1047	1010	1050	1037	1028	1061	1091	1011	1005	1034	1042	1019	502	1050	1035	502	1036	552	1007	1022	1017	1047	1035	1039	1005	1052	1001
Base: Weighted Total	26337	1047	1010	1050	1037	1028	1061	1091	1011	1005	1034	1042	1019	502	1050	1035	502	1036	552	1007	1022	1017	1047	1035	1039	1005	1052	1001
Fully approve	11049	360	220	331	591	449	642	598	212	398	384	401	357	97	545	621	206	238	228	484	279	655	608	462	233	216	726	633
	42	34.4	21.7	31.5	57	43.7	60.5	54.9	21	39.6	37.1	38.5	35	19.3	51.9	60	41	23	41.3	48.1	27.3	64.4	58	44.6	22.4	21.5	69	63.2
		(AB) (AH) (AM) (AQ) (AT) (AX) (AY)		(AB) (AH) (AM) (AQ) (AT) (AX) (AY)	(AA) (AB) (AC) (AE) (AH) (AI) (AJ) (AK) (AL) (AM) (AN) (AP) (AQ) (AR) (AS) (AT) (AW) (AX) (AY)	(AA) (AB) (AC) (AH) (AJ) (AK) (AL) (AM) (AQ) (AT) (AX) (AY)	(AA) (AB) (AC) (AE) (AG) (AH) (AI) (AJ) (AK) (AL) (AM) (AN) (AP) (AQ) (AR) (AS) (AT) (AW) (AX) (AY)	(AA) (AB) (AC) (AE) (AH) (AI) (AJ) (AK) (AL) (AM) (AP) (AQ) (AR) (AS) (AT) (AW) (AX) (AY)		(AA) (AB) (AC) (AH) (AL) (AM) (AQ) (AT) (AX) (AY)	(AB) (AC) (AH) (AM) (AQ) (AT) (AX) (AY)	(AB) (AC) (AH) (AM) (AQ) (AT) (AX) (AY)	(AB) (AH) (AM) (AQ) (AT) (AX) (AY)		(AA) (AB) (AC) (AE) (AH) (AI) (AJ) (AK) (AL) (AM) (AP) (AQ) (AR) (AT) (AW) (AX) (AY)	(AA) (AB) (AC) (AE) (AG) (AH) (AI) (AJ) (AK) (AL) (AM) (AN) (AP) (AQ) (AR) (AS) (AT) (AW) (AX) (AY)	(AA) (AB) (AC) (AH) (AL) (AM) (AQ) (AT) (AX) (AY)		(AA) (AB) (AC) (AH) (AL) (AM) (AQ) (AT) (AX) (AY)	(AA) (AB) (AC) (AE) (AH) (AI) (AJ) (AK) (AL) (AM) (AP) (AQ) (AR) (AT) (AX) (AY)	(AB) (AH) (AM) (AQ) (AX) (AY)	(AA) (AB) (AC) (AD) (AE) (AG) (AH) (AI) (AJ) (AK) (AL) (AM) (AN) (AP) (AQ) (AR) (AS) (AT) (AV) (AW) (AX) (AY)	(AA) (AB) (AC) (AE) (AH) (AI) (AJ) (AK) (AL) (AM) (AN) (AP) (AQ) (AR) (AS) (AT) (AW) (AX) (AY)	(AA) (AB) (AC) (AH) (AI) (AJ) (AK) (AL) (AM) (AQ) (AT) (AX) (AY)			(AA) (AB) (AC) (AD) (AE) (AF) (AG) (AH) (AI) (AJ) (AK) (AL) (AM) (AN) (AO) (AP) (AQ) (AR) (AS) (AT) (AU) (AV) (AW) (AX) (AY) (BA)	(AA) (AB) (AC) (AD) (AE) (AG) (AH) (AI) (AJ) (AK) (AL) (AM) (AN) (AP) (AQ) (AR) (AS) (AT) (AV) (AW) (AX) (AY)
Tend to approve	7619	375	210	275	272	278	213	233	177	336	376	365	326	90	221	230	156	249	150	291	247	240	281	287	364	218	209	179
	28.9	35.8	20.8	26.1	26.2	27.1	20.1	21.4	17.5	33.4	36.4	35	32	18	21	22.2	31.1	24.1	27.2	28.9	24.1	23.6	26.8	27.7	35	21.7	19.9	17.9
		(AB) (AC) (AD) (AE) (AF) (AG) (AH) (AM) (AN) (AO) (AQ) (AR) (AS) (AT) (AU) (AV) (AW) (AY) (AZ) (BA)		(AB) (AF) (AG) (AH) (AM) (AN) (AY) (AZ) (BA)	(AB) (AF) (AG) (AH) (AM) (AN) (AY) (AZ) (BA)	(AB) (AF) (AG) (AH) (AM) (AN) (AO) (AY) (AZ) (BA)		(AH)		(AB) (AC) (AD) (AE) (AF) (AG) (AH) (AM) (AN) (AO) (AQ) (AR) (AS) (AT) (AU) (AV) (AW) (AY) (AZ) (BA)	(AB) (AC) (AD) (AE) (AF) (AG) (AH) (AL) (AM) (AN) (AO) (AQ) (AR) (AS) (AT) (AU) (AV) (AW) (AY) (AZ) (BA)	(AB) (AC) (AD) (AE) (AF) (AG) (AH) (AM) (AN) (AO) (AQ) (AR) (AS) (AT) (AU) (AV) (AW) (AY) (AZ) (BA)	(AB) (AC) (AD) (AE) (AF) (AG) (AH) (AM) (AN) (AO) (AQ) (AT) (AU) (AV) (AY) (AZ) (BA)			(AH) (BA)	(AB) (AF) (AG) (AH) (AM) (AN) (AO) (AQ) (AT) (AU) (AY) (AZ) (BA)	(AF) (AH) (AM) (AZ) (BA)	(AB) (AF) (AG) (AH) (AM) (AN) (AY) (AZ) (BA)	(AB) (AF) (AG) (AH) (AM) (AN) (AO) (AQ) (AT) (AU) (AY) (AZ) (BA)	(AF) (AH) (AM) (AZ) (BA)	(AH) (AM) (AZ) (BA)	(AB) (AF) (AG) (AH) (AM) (AN) (AO) (AY) (AZ) (BA)	(AB) (AF) (AG) (AH) (AM) (AN) (AO) (AY) (AZ) (BA)	(AB) (AC) (AD) (AE) (AF) (AG) (AH) (AM) (AN) (AO) (AQ) (AR) (AS) (AT) (AU) (AV) (AW) (AY) (AZ) (BA)	(AH) (BA)
Tend to disapprove	3313	134	257	201	71	110	91	109	216	122	125	141	161	115	133	77	64	234	75	110	193	59	79	145	242	201	59	66
	12.6	12.8	25.4	19.2	6.9	10.7	8.6	10	21.4	12.2	12.1	13.6	15.8	22.8	12.7	7.4	12.7	22.6	13.6	10.9	18.9	5.8	7.6	14	23.2	20	5.6	6.6
		(AD) (AF) (AO) (AU) (AV) (AZ) (BA)	(AA) (AC) (AD) (AE) (AF) (AG) (AI) (AJ) (AK) (AL) (AN) (AO) (AP) (AR) (AS) (AT) (AU) (AV) (AW) (AY) (AZ) (BA)	(AA) (AD) (AE) (AF) (AG) (AI) (AJ) (AK) (AN) (AO) (AP) (AR) (AS) (AU) (AV) (AW) (AZ) (BA)		(AD) (AO) (AU) (AV) (AZ) (BA)	(AU) (AZ)	(AD) (AU) (AZ) (BA)	(AA) (AD) (AE) (AF) (AG) (AI) (AJ) (AK) (AL) (AN) (AO) (AP) (AR) (AS) (AU) (AV) (AW) (AZ) (BA)	(AD) (AF) (AO) (AU) (AV) (AZ) (BA)	(AD) (AF) (AO) (AU) (AV) (AZ) (BA)	(AD) (AF) (AG) (AO) (AU) (AV) (AZ) (BA)	(AD) (AE) (AF) (AG) (AI) (AJ) (AO) (AS) (AU) (AV) (AZ) (BA)	(AA) (AD) (AE) (AF) (AG) (AI) (AJ) (AK) (AL) (AN) (AO) (AP) (AR) (AS) (AU) (AV) (AW) (AZ) (BA)	(AD) (AF) (AO) (AU) (AV) (AZ) (BA)		(AD) (AF) (AO) (AU) (AV) (AZ) (BA)	(AA) (AD) (AE) (AF) (AG) (AI) (AJ) (AK) (AL) (AN) (AO) (AP) (AR) (AS) (AT) (AU) (AV) (AW) (AZ) (BA)	(AD) (AF) (AO) (AU) (AV) (AZ) (BA)	(AD) (AO) (AU) (AV) (AZ) (BA)	(AA) (AD) (AE) (AF) (AG) (AI) (AJ) (AK) (AN) (AO) (AP) (AR) (AS) (AU) (AV) (AW) (AZ) (BA)			(AD) (AE) (AF) (AG) (AO) (AU) (AV) (AZ) (BA)	(AA) (AC) (AD) (AE) (AF) (AG) (AI) (AJ) (AK) (AL) (AN) (AO) (AP) (AR) (AS) (AT) (AU) (AV) (AW) (AZ) (BA)	(AA) (AD) (AE) (AF) (AG) (AI) (AJ) (AK) (AL) (AN) (AO) (AP) (AR) (AS) (AU) (AV) (AW) (AZ) (BA)
Fully disapprove	2737	103	258	172	37	132	65	112	371	73	75	81	106	180	96	56	52	222	76	60	239	28	43	77	136	281	27	58
	10.4	9.8	25.5	16.4	3.6	12.8	6.1	10.3	36.7	7.2	7.3	7.8	10.4	35.8	9.2	5.4	10.3	21.4	13.7	5.9	23.4	2.8	4.1	7.5	13.1	28	2.6	5.8
		(AD) (AF) (AI) (AJ) (AO) (AS) (AU) (AV) (AZ) (BA)	(AA) (AC) (AD) (AE) (AF) (AG) (AI) (AJ) (AK) (AL) (AN) (AO) (AP) (AR) (AS) (AU) (AV) (AW) (AX) (AZ) (BA)	(AA) (AD) (AE) (AF) (AG) (AI) (AJ) (AK) (AL) (AN) (AO) (AP) (AS) (AU) (AV) (AW) (AX) (AZ) (BA)		(AA) (AD) (AF) (AI) (AJ) (AK) (AN) (AO) (AS) (AU) (AV) (AW) (AZ) (BA)	(AD) (AU) (AZ)	(AD) (AF) (AI) (AJ) (AO) (AS) (AU) (AV) (AW) (AZ) (BA)	(AA) (AB) (AC) (AD) (AE) (AF) (AG) (AI) (AJ) (AK) (AL) (AN) (AO) (AP) (AQ) (AR) (AS) (AT) (AU) (AV) (AW) (AX) (AY) (AZ) (BA)	(AD) (AU) (AV) (AZ)	(AD) (AU) (AV) (AZ)	(AD) (AU) (AV) (AZ)	(AD) (AF) (AI) (AJ) (AO) (AS) (AU) (AV) (AW) (AZ) (BA)	(AA) (AB) (AC) (AD) (AE) (AF) (AG) (AI) (AJ) (AK) (AL) (AN) (AO) (AP) (AQ) (AR) (AS) (AT) (AU) (AV) (AW) (AX) (AY) (AZ) (BA)	(AD) (AF) (AO) (AS) (AU) (AV) (AZ) (BA)	(AU) (AZ)	(AD) (AF) (AO) (AS) (AU) (AV) (AZ) (BA)	(AA) (AC) (AD) (AE) (AF) (AG) (AI) (AJ) (AK) (AL) (AN) (AO) (AP) (AR) (AS) (AU) (AV) (AW) (AX) (AZ) (BA)	(AA) (AD) (AF) (AI) (AJ) (AK) (AN) (AO) (AS) (AU) (AV) (AW) (AZ) (BA)	(AD) (AU) (AZ)	(AA) (AC) (AD) (AE) (AF) (AG) (AI) (AJ) (AK) (AL) (AN) (AO) (AP) (AR) (AS) (AU) (AV) (AW) (AX) (AZ) (BA)			(AD) (AU) (AV) (AZ)	(AA) (AD) (AF) (AI) (AJ) (AK) (AN) (AO) (AS) (AU) (AV) (AW) (AZ) (BA)	(AA) (AC) (AD) (AE) (AF) (AG) (AI) (AJ) (AK) (AL) (AN) (AO) (AP) (AQ) (AR) (AS) (AT) (AU) (AV) (AW) (AX) (AZ) (BA)		(AD) (AU) (AZ)
Don’t know	1620	75	65	71	65	59	49	38	35	76	74	54	69	21	54	51	25	93	23	62	64	35	36	65	65	90	30	65
	6.1	7.1	6.5	6.8	6.3	5.7	4.6	3.5	3.4	7.6	7.1	5.2	6.8	4.1	5.2	4.9	4.9	8.9	4.2	6.1	6.2	3.4	3.5	6.3	6.2	8.9	2.9	6.5
		(AF) (AG) (AH) (AM) (AR) (AU) (AV) (AZ)	(AG) (AH) (AU) (AV) (AZ)	(AF) (AG) (AH) (AM) (AU) (AV) (AZ)	(AG) (AH) (AU) (AV) (AZ)	(AG) (AH) (AU) (AV) (AZ)	(AZ)			(AF) (AG) (AH) (AK) (AM) (AN) (AO) (AR) (AU) (AV) (AZ)	(AF) (AG) (AH) (AM) (AR) (AU) (AV) (AZ)	(AZ)	(AF) (AG) (AH) (AU) (AV) (AZ)		(AZ)	(AZ)		(AD) (AE) (AF) (AG) (AH) (AK) (AM) (AN) (AO) (AP) (AR) (AS) (AT) (AU) (AV) (AW) (AX) (AZ) (BA)		(AG) (AH) (AU) (AV) (AZ)	(AG) (AH) (AU) (AV) (AZ)			(AG) (AH) (AU) (AV) (AZ)	(AG) (AH) (AU) (AV) (AZ)	(AD) (AE) (AF) (AG) (AH) (AK) (AM) (AN) (AO) (AP) (AR) (AS) (AT) (AU) (AV) (AW) (AX) (AZ) (BA)		(AG) (AH) (AU) (AV) (AZ)
Total 'Approve'	18668	735	430	606	863	727	856	832	389	734	760	765	683	187	766	851	362	487	378	776	525	896	889	748	597	434	935	812
	70.9	70.2	42.6	57.7	83.2	70.7	80.7	76.2	38.4	73	73.5	73.5	67	37.3	73	82.2	72.1	47	68.5	77	51.4	88.1	84.9	72.3	57.4	43.2	88.9	81.1
		(AB) (AC) (AH) (AM) (AQ) (AT) (AX) (AY)		(AB) (AH) (AM) (AQ) (AT) (AY)	(AA) (AB) (AC) (AE) (AG) (AH) (AI) (AJ) (AK) (AL) (AM) (AN) (AP) (AQ) (AR) (AS) (AT) (AW) (AX) (AY)	(AB) (AC) (AH) (AM) (AQ) (AT) (AX) (AY)	(AA) (AB) (AC) (AE) (AG) (AH) (AI) (AJ) (AK) (AL) (AM) (AN) (AP) (AQ) (AR) (AT) (AW) (AX) (AY)	(AA) (AB) (AC) (AE) (AH) (AL) (AM) (AQ) (AR) (AT) (AX) (AY)		(AB) (AC) (AH) (AL) (AM) (AQ) (AT) (AX) (AY)	(AB) (AC) (AH) (AL) (AM) (AQ) (AT) (AX) (AY)	(AB) (AC) (AH) (AL) (AM) (AQ) (AT) (AX) (AY)	(AB) (AC) (AH) (AM) (AQ) (AT) (AX) (AY)		(AB) (AC) (AH) (AL) (AM) (AQ) (AT) (AX) (AY)	(AA) (AB) (AC) (AE) (AG) (AH) (AI) (AJ) (AK) (AL) (AM) (AN) (AP) (AQ) (AR) (AS) (AT) (AW) (AX) (AY)	(AB) (AC) (AH) (AM) (AQ) (AT) (AX) (AY)	(AH) (AM)	(AB) (AC) (AH) (AM) (AQ) (AT) (AX) (AY)	(AA) (AB) (AC) (AE) (AH) (AI) (AL) (AM) (AN) (AP) (AQ) (AR) (AT) (AW) (AX) (AY)	(AB) (AH) (AM) (AY)	(AA) (AB) (AC) (AD) (AE) (AF) (AG) (AH) (AI) (AJ) (AK) (AL) (AM) (AN) (AO) (AP) (AQ) (AR) (AS) (AT) (AW) (AX) (AY) (BA)	(AA) (AB) (AC) (AE) (AF) (AG) (AH) (AI) (AJ) (AK) (AL) (AM) (AN) (AP) (AQ) (AR) (AS) (AT) (AW) (AX) (AY) (BA)	(AB) (AC) (AH) (AL) (AM) (AQ) (AT) (AX) (AY)	(AB) (AH) (AM) (AQ) (AT) (AY)	(AH) (AM)	(AA) (AB) (AC) (AD) (AE) (AF) (AG) (AH) (AI) (AJ) (AK) (AL) (AM) (AN) (AO) (AP) (AQ) (AR) (AS) (AT) (AV) (AW) (AX) (AY) (BA)	(AA) (AB) (AC) (AE) (AG) (AH) (AI) (AJ) (AK) (AL) (AM) (AN) (AP) (AQ) (AR) (AS) (AT) (AW) (AX) (AY)
Total 'Disapprove'	6050	237	515	373	109	242	156	221	588	195	200	223	267	294	230	133	116	456	151	169	433	87	122	222	378	481	87	124
	23	22.7	51	35.5	10.5	23.5	14.7	20.3	58.1	19.4	19.3	21.4	26.2	58.6	21.9	12.9	23	44	27.3	16.8	42.4	8.6	11.7	21.4	36.4	47.9	8.2	12.4
		(AD) (AF) (AO) (AS) (AU) (AV) (AZ) (BA)	(AA) (AC) (AD) (AE) (AF) (AG) (AI) (AJ) (AK) (AL) (AN) (AO) (AP) (AQ) (AR) (AS) (AT) (AU) (AV) (AW) (AX) (AZ) (BA)	(AA) (AD) (AE) (AF) (AG) (AI) (AJ) (AK) (AL) (AN) (AO) (AP) (AR) (AS) (AU) (AV) (AW) (AZ) (BA)		(AD) (AF) (AI) (AJ) (AO) (AS) (AU) (AV) (AZ) (BA)	(AD) (AU) (AZ)	(AD) (AF) (AO) (AU) (AV) (AZ) (BA)	(AA) (AB) (AC) (AD) (AE) (AF) (AG) (AI) (AJ) (AK) (AL) (AN) (AO) (AP) (AQ) (AR) (AS) (AT) (AU) (AV) (AW) (AX) (AY) (AZ) (BA)	(AD) (AF) (AO) (AU) (AV) (AZ) (BA)	(AD) (AF) (AO) (AU) (AV) (AZ) (BA)	(AD) (AF) (AO) (AS) (AU) (AV) (AZ) (BA)	(AD) (AF) (AG) (AI) (AJ) (AK) (AN) (AO) (AS) (AU) (AV) (AW) (AZ) (BA)	(AA) (AB) (AC) (AD) (AE) (AF) (AG) (AI) (AJ) (AK) (AL) (AN) (AO) (AP) (AQ) (AR) (AS) (AT) (AU) (AV) (AW) (AX) (AY) (AZ) (BA)	(AD) (AF) (AO) (AS) (AU) (AV) (AZ) (BA)	(AU) (AZ)	(AD) (AF) (AO) (AS) (AU) (AV) (AZ) (BA)	(AA) (AC) (AD) (AE) (AF) (AG) (AI) (AJ) (AK) (AL) (AN) (AO) (AP) (AR) (AS) (AU) (AV) (AW) (AX) (AZ) (BA)	(AD) (AF) (AG) (AI) (AJ) (AK) (AN) (AO) (AS) (AU) (AV) (AW) (AZ) (BA)	(AD) (AO) (AU) (AV) (AZ) (BA)	(AA) (AC) (AD) (AE) (AF) (AG) (AI) (AJ) (AK) (AL) (AN) (AO) (AP) (AR) (AS) (AU) (AV) (AW) (AX) (AZ) (BA)		(AU) (AZ)	(AD) (AF) (AO) (AS) (AU) (AV) (AZ) (BA)	(AA) (AD) (AE) (AF) (AG) (AI) (AJ) (AK) (AL) (AN) (AO) (AP) (AR) (AS) (AU) (AV) (AW) (AZ) (BA)	(AA) (AC) (AD) (AE) (AF) (AG) (AI) (AJ) (AK) (AL) (AN) (AO) (AP) (AR) (AS) (AT) (AU) (AV) (AW) (AX) (AZ) (BA)		(AU) (AZ)

## Sheet: Q3_2
Home
Flash Eurobarometer 514
EU’s response to the energy challenges
Fieldwork: 23/11-30/11/2022
VOLUME A (Weighted)
Q3_2 For each of the following measures that have been announced, please tell me if you approve of them or not. Financial support to Ukraine
Base: All
		Country	Country	Country	Country	Country	Country	Country	Country	Country	Country	Country	Country	Country	Country	Country	Country	Country	Country	Country	Country	Country	Country	Country	Country	Country	Country	Country
	EU27	BE	BG	CZ	DK	DE	EE	IE	EL	ES	FR	HR	IT	CY	LV	LT	LU	HU	MT	NL	AT	PL	PT	RO	SI	SK	FI	SE
		(AA)	(AB)	(AC)	(AD)	(AE)	(AF)	(AG)	(AH)	(AI)	(AJ)	(AK)	(AL)	(AM)	(AN)	(AO)	(AP)	(AQ)	(AR)	(AS)	(AT)	(AU)	(AV)	(AW)	(AX)	(AY)	(AZ)	(BA)
Base: Total	26337	1047	1010	1050	1037	1028	1061	1091	1011	1005	1034	1042	1019	502	1050	1035	502	1036	552	1007	1022	1017	1047	1035	1039	1005	1052	1001
Base: Weighted Total	26337	1047	1010	1050	1037	1028	1061	1091	1011	1005	1034	1042	1019	502	1050	1035	502	1036	552	1007	1022	1017	1047	1035	1039	1005	1052	1001
Fully approve	8049	205	184	183	489	308	498	498	249	265	254	334	273	146	453	532	163	177	241	346	222	457	482	365	155	165	687	577
	30.6	19.6	18.3	17.4	47.2	30	46.9	45.6	24.6	26.4	24.6	32	26.8	29.1	43.1	51.4	32.6	17.1	43.6	34.4	21.7	44.9	46	35.3	15	16.4	65.3	57.7
		(AX)			(AA) (AB) (AC) (AE) (AH) (AI) (AJ) (AK) (AL) (AM) (AP) (AQ) (AS) (AT) (AW) (AX) (AY)	(AA) (AB) (AC) (AH) (AJ) (AQ) (AT) (AX) (AY)	(AA) (AB) (AC) (AE) (AH) (AI) (AJ) (AK) (AL) (AM) (AP) (AQ) (AS) (AT) (AW) (AX) (AY)	(AA) (AB) (AC) (AE) (AH) (AI) (AJ) (AK) (AL) (AM) (AP) (AQ) (AS) (AT) (AW) (AX) (AY)	(AA) (AB) (AC) (AQ) (AX) (AY)	(AA) (AB) (AC) (AQ) (AT) (AX) (AY)	(AA) (AB) (AC) (AQ) (AX) (AY)	(AA) (AB) (AC) (AH) (AI) (AJ) (AL) (AQ) (AT) (AX) (AY)	(AA) (AB) (AC) (AQ) (AT) (AX) (AY)	(AA) (AB) (AC) (AQ) (AT) (AX) (AY)	(AA) (AB) (AC) (AE) (AH) (AI) (AJ) (AK) (AL) (AM) (AP) (AQ) (AS) (AT) (AW) (AX) (AY)	(AA) (AB) (AC) (AE) (AG) (AH) (AI) (AJ) (AK) (AL) (AM) (AN) (AP) (AQ) (AR) (AS) (AT) (AU) (AV) (AW) (AX) (AY)	(AA) (AB) (AC) (AH) (AI) (AJ) (AL) (AQ) (AT) (AX) (AY)		(AA) (AB) (AC) (AE) (AH) (AI) (AJ) (AK) (AL) (AM) (AP) (AQ) (AS) (AT) (AW) (AX) (AY)	(AA) (AB) (AC) (AE) (AH) (AI) (AJ) (AL) (AQ) (AT) (AX) (AY)	(AC) (AQ) (AX) (AY)	(AA) (AB) (AC) (AE) (AH) (AI) (AJ) (AK) (AL) (AM) (AP) (AQ) (AS) (AT) (AW) (AX) (AY)	(AA) (AB) (AC) (AE) (AH) (AI) (AJ) (AK) (AL) (AM) (AP) (AQ) (AS) (AT) (AW) (AX) (AY)	(AA) (AB) (AC) (AE) (AH) (AI) (AJ) (AL) (AM) (AQ) (AT) (AX) (AY)			(AA) (AB) (AC) (AD) (AE) (AF) (AG) (AH) (AI) (AJ) (AK) (AL) (AM) (AN) (AO) (AP) (AQ) (AR) (AS) (AT) (AU) (AV) (AW) (AX) (AY) (BA)	(AA) (AB) (AC) (AD) (AE) (AF) (AG) (AH) (AI) (AJ) (AK) (AL) (AM) (AN) (AO) (AP) (AQ) (AR) (AS) (AT) (AU) (AV) (AW) (AX) (AY)
Tend to approve	10361	435	284	355	370	397	371	302	297	482	458	469	426	161	340	341	214	334	176	405	359	353	416	400	491	290	279	273
	39.3	41.5	28.1	33.9	35.7	38.6	34.9	27.7	29.3	48	44.2	45.1	41.8	32	32.4	32.9	42.7	32.2	31.9	40.2	35.1	34.7	39.8	38.7	47.3	28.9	26.5	27.2
		(AB) (AC) (AD) (AF) (AG) (AH) (AM) (AN) (AO) (AQ) (AR) (AT) (AU) (AY) (AZ) (BA)		(AB) (AG) (AH) (AY) (AZ) (BA)	(AB) (AG) (AH) (AY) (AZ) (BA)	(AB) (AC) (AG) (AH) (AM) (AN) (AO) (AQ) (AR) (AY) (AZ) (BA)	(AB) (AG) (AH) (AY) (AZ) (BA)			(AA) (AB) (AC) (AD) (AE) (AF) (AG) (AH) (AL) (AM) (AN) (AO) (AQ) (AR) (AS) (AT) (AU) (AV) (AW) (AY) (AZ) (BA)	(AB) (AC) (AD) (AE) (AF) (AG) (AH) (AM) (AN) (AO) (AQ) (AR) (AT) (AU) (AW) (AY) (AZ) (BA)	(AB) (AC) (AD) (AE) (AF) (AG) (AH) (AM) (AN) (AO) (AQ) (AR) (AS) (AT) (AU) (AV) (AW) (AY) (AZ) (BA)	(AB) (AC) (AD) (AF) (AG) (AH) (AM) (AN) (AO) (AQ) (AR) (AT) (AU) (AY) (AZ) (BA)	(AZ)	(AG) (AZ) (BA)	(AG) (AZ) (BA)	(AB) (AC) (AD) (AF) (AG) (AH) (AM) (AN) (AO) (AQ) (AR) (AT) (AU) (AY) (AZ) (BA)	(AG) (AZ) (BA)	(AZ)	(AB) (AC) (AD) (AF) (AG) (AH) (AM) (AN) (AO) (AQ) (AR) (AT) (AU) (AY) (AZ) (BA)	(AB) (AG) (AH) (AY) (AZ) (BA)	(AB) (AG) (AH) (AY) (AZ) (BA)	(AB) (AC) (AF) (AG) (AH) (AM) (AN) (AO) (AQ) (AR) (AT) (AU) (AY) (AZ) (BA)	(AB) (AC) (AG) (AH) (AM) (AN) (AO) (AQ) (AR) (AY) (AZ) (BA)	(AA) (AB) (AC) (AD) (AE) (AF) (AG) (AH) (AL) (AM) (AN) (AO) (AQ) (AR) (AS) (AT) (AU) (AV) (AW) (AY) (AZ) (BA)
Tend to disapprove	3694	182	249	249	79	144	96	124	174	115	141	131	167	96	127	79	66	244	56	112	189	101	73	166	227	224	47	72
	14	17.4	24.6	23.7	7.6	14	9	11.3	17.2	11.5	13.7	12.6	16.4	19.1	12.1	7.7	13.1	23.6	10.1	11.2	18.5	9.9	6.9	16	21.8	22.3	4.5	7.2
		(AD) (AE) (AF) (AG) (AI) (AJ) (AK) (AN) (AO) (AP) (AR) (AS) (AU) (AV) (AZ) (BA)	(AA) (AD) (AE) (AF) (AG) (AH) (AI) (AJ) (AK) (AL) (AM) (AN) (AO) (AP) (AR) (AS) (AT) (AU) (AV) (AW) (AZ) (BA)	(AA) (AD) (AE) (AF) (AG) (AH) (AI) (AJ) (AK) (AL) (AN) (AO) (AP) (AR) (AS) (AT) (AU) (AV) (AW) (AZ) (BA)	(AZ)	(AD) (AF) (AO) (AR) (AU) (AV) (AZ) (BA)	(AZ)	(AD) (AO) (AV) (AZ) (BA)	(AD) (AF) (AG) (AI) (AJ) (AK) (AN) (AO) (AR) (AS) (AU) (AV) (AZ) (BA)	(AD) (AO) (AV) (AZ) (BA)	(AD) (AF) (AO) (AU) (AV) (AZ) (BA)	(AD) (AF) (AO) (AV) (AZ) (BA)	(AD) (AF) (AG) (AI) (AK) (AN) (AO) (AR) (AS) (AU) (AV) (AZ) (BA)	(AD) (AE) (AF) (AG) (AI) (AJ) (AK) (AN) (AO) (AP) (AR) (AS) (AU) (AV) (AZ) (BA)	(AD) (AF) (AO) (AV) (AZ) (BA)	(AZ)	(AD) (AF) (AO) (AV) (AZ) (BA)	(AA) (AD) (AE) (AF) (AG) (AH) (AI) (AJ) (AK) (AL) (AN) (AO) (AP) (AR) (AS) (AT) (AU) (AV) (AW) (AZ) (BA)	(AZ)	(AD) (AO) (AV) (AZ) (BA)	(AD) (AE) (AF) (AG) (AI) (AJ) (AK) (AN) (AO) (AP) (AR) (AS) (AU) (AV) (AZ) (BA)	(AV) (AZ) (BA)	(AZ)	(AD) (AF) (AG) (AI) (AK) (AN) (AO) (AR) (AS) (AU) (AV) (AZ) (BA)	(AA) (AD) (AE) (AF) (AG) (AH) (AI) (AJ) (AK) (AL) (AN) (AO) (AP) (AR) (AS) (AU) (AV) (AW) (AZ) (BA)	(AA) (AD) (AE) (AF) (AG) (AH) (AI) (AJ) (AK) (AL) (AN) (AO) (AP) (AR) (AS) (AT) (AU) (AV) (AW) (AZ) (BA)		(AZ)
Fully disapprove	2763	144	236	221	38	122	55	135	262	77	93	70	102	88	73	51	50	204	59	84	203	58	40	74	108	269	24	45
	10.5	13.8	23.3	21.1	3.7	11.9	5.1	12.4	25.9	7.7	9	6.7	10	17.5	7	5	10	19.7	10.7	8.4	19.8	5.7	3.9	7.2	10.4	26.7	2.3	4.5
		(AD) (AF) (AI) (AJ) (AK) (AL) (AN) (AO) (AP) (AS) (AU) (AV) (AW) (AX) (AZ) (BA)	(AA) (AD) (AE) (AF) (AG) (AI) (AJ) (AK) (AL) (AM) (AN) (AO) (AP) (AR) (AS) (AU) (AV) (AW) (AX) (AZ) (BA)	(AA) (AD) (AE) (AF) (AG) (AI) (AJ) (AK) (AL) (AN) (AO) (AP) (AR) (AS) (AU) (AV) (AW) (AX) (AZ) (BA)		(AD) (AF) (AI) (AJ) (AK) (AN) (AO) (AS) (AU) (AV) (AW) (AZ) (BA)	(AZ)	(AD) (AF) (AI) (AJ) (AK) (AN) (AO) (AS) (AU) (AV) (AW) (AZ) (BA)	(AA) (AC) (AD) (AE) (AF) (AG) (AI) (AJ) (AK) (AL) (AM) (AN) (AO) (AP) (AQ) (AR) (AS) (AT) (AU) (AV) (AW) (AX) (AZ) (BA)	(AD) (AF) (AO) (AV) (AZ) (BA)	(AD) (AF) (AO) (AU) (AV) (AZ) (BA)	(AD) (AV) (AZ) (BA)	(AD) (AF) (AK) (AN) (AO) (AU) (AV) (AW) (AZ) (BA)	(AD) (AE) (AF) (AG) (AI) (AJ) (AK) (AL) (AN) (AO) (AP) (AR) (AS) (AU) (AV) (AW) (AX) (AZ) (BA)	(AD) (AV) (AZ) (BA)	(AZ)	(AD) (AF) (AK) (AO) (AU) (AV) (AZ) (BA)	(AA) (AD) (AE) (AF) (AG) (AI) (AJ) (AK) (AL) (AN) (AO) (AP) (AR) (AS) (AU) (AV) (AW) (AX) (AZ) (BA)	(AD) (AF) (AK) (AN) (AO) (AU) (AV) (AW) (AZ) (BA)	(AD) (AF) (AO) (AU) (AV) (AZ) (BA)	(AA) (AD) (AE) (AF) (AG) (AI) (AJ) (AK) (AL) (AN) (AO) (AP) (AR) (AS) (AU) (AV) (AW) (AX) (AZ) (BA)	(AD) (AZ)		(AD) (AV) (AZ) (BA)	(AD) (AF) (AI) (AK) (AN) (AO) (AU) (AV) (AW) (AZ) (BA)	(AA) (AC) (AD) (AE) (AF) (AG) (AI) (AJ) (AK) (AL) (AM) (AN) (AO) (AP) (AQ) (AR) (AS) (AT) (AU) (AV) (AW) (AX) (AZ) (BA)		(AZ)
Don’t know	1469	80	58	41	61	57	42	32	29	65	88	38	50	12	57	31	9	77	20	59	50	48	35	30	57	57	15	34
	5.6	7.7	5.7	3.9	5.8	5.5	4	2.9	2.9	6.5	8.5	3.6	4.9	2.3	5.4	3	1.7	7.4	3.6	5.9	4.9	4.8	3.4	2.9	5.5	5.7	1.4	3.4
		(AC) (AF) (AG) (AH) (AK) (AL) (AM) (AO) (AP) (AR) (AT) (AU) (AV) (AW) (AZ) (BA)	(AG) (AH) (AM) (AO) (AP) (AV) (AW) (AZ) (BA)	(AP) (AZ)	(AC) (AG) (AH) (AK) (AM) (AO) (AP) (AV) (AW) (AZ) (BA)	(AG) (AH) (AM) (AO) (AP) (AV) (AW) (AZ) (BA)	(AP) (AZ)	(AZ)	(AZ)	(AC) (AF) (AG) (AH) (AK) (AM) (AO) (AP) (AR) (AV) (AW) (AZ) (BA)	(AB) (AC) (AD) (AE) (AF) (AG) (AH) (AK) (AL) (AM) (AN) (AO) (AP) (AR) (AS) (AT) (AU) (AV) (AW) (AX) (AY) (AZ) (BA)	(AZ)	(AG) (AH) (AM) (AP) (AW) (AZ)		(AG) (AH) (AM) (AO) (AP) (AV) (AW) (AZ) (BA)	(AZ)		(AC) (AF) (AG) (AH) (AK) (AL) (AM) (AO) (AP) (AR) (AT) (AU) (AV) (AW) (AZ) (BA)	(AZ)	(AC) (AG) (AH) (AK) (AM) (AO) (AP) (AV) (AW) (AZ) (BA)	(AG) (AH) (AM) (AP) (AW) (AZ)	(AG) (AH) (AM) (AP) (AW) (AZ)	(AZ)	(AZ)	(AG) (AH) (AM) (AO) (AP) (AV) (AW) (AZ) (BA)	(AG) (AH) (AK) (AM) (AO) (AP) (AV) (AW) (AZ) (BA)		(AZ)
Total 'Approve'	18411	640	468	539	859	705	868	800	546	747	712	803	699	307	793	873	378	511	417	751	580	810	899	765	647	455	966	850
	69.9	61.1	46.3	51.3	82.9	68.6	81.8	73.3	54	74.4	68.8	77.1	68.6	61.1	75.5	84.4	75.2	49.3	75.6	74.6	56.8	79.6	85.8	74	62.2	45.3	91.8	84.9
		(AB) (AC) (AH) (AQ) (AT) (AY)		(AB) (AY)	(AA) (AB) (AC) (AE) (AG) (AH) (AI) (AJ) (AK) (AL) (AM) (AN) (AP) (AQ) (AR) (AS) (AT) (AW) (AX) (AY)	(AA) (AB) (AC) (AH) (AM) (AQ) (AT) (AX) (AY)	(AA) (AB) (AC) (AE) (AG) (AH) (AI) (AJ) (AK) (AL) (AM) (AN) (AP) (AQ) (AR) (AS) (AT) (AW) (AX) (AY)	(AA) (AB) (AC) (AE) (AH) (AJ) (AL) (AM) (AQ) (AT) (AX) (AY)	(AB) (AQ) (AY)	(AA) (AB) (AC) (AE) (AH) (AJ) (AL) (AM) (AQ) (AT) (AX) (AY)	(AA) (AB) (AC) (AH) (AM) (AQ) (AT) (AX) (AY)	(AA) (AB) (AC) (AE) (AH) (AJ) (AL) (AM) (AQ) (AT) (AX) (AY)	(AA) (AB) (AC) (AH) (AM) (AQ) (AT) (AX) (AY)	(AB) (AC) (AH) (AQ) (AY)	(AA) (AB) (AC) (AE) (AH) (AJ) (AL) (AM) (AQ) (AT) (AX) (AY)	(AA) (AB) (AC) (AE) (AG) (AH) (AI) (AJ) (AK) (AL) (AM) (AN) (AP) (AQ) (AR) (AS) (AT) (AU) (AW) (AX) (AY)	(AA) (AB) (AC) (AE) (AH) (AJ) (AL) (AM) (AQ) (AT) (AX) (AY)		(AA) (AB) (AC) (AE) (AH) (AJ) (AL) (AM) (AQ) (AT) (AX) (AY)	(AA) (AB) (AC) (AE) (AH) (AJ) (AL) (AM) (AQ) (AT) (AX) (AY)	(AB) (AC) (AQ) (AY)	(AA) (AB) (AC) (AE) (AG) (AH) (AI) (AJ) (AL) (AM) (AN) (AQ) (AS) (AT) (AW) (AX) (AY)	(AA) (AB) (AC) (AE) (AF) (AG) (AH) (AI) (AJ) (AK) (AL) (AM) (AN) (AP) (AQ) (AR) (AS) (AT) (AU) (AW) (AX) (AY)	(AA) (AB) (AC) (AE) (AH) (AJ) (AL) (AM) (AQ) (AT) (AX) (AY)	(AB) (AC) (AH) (AQ) (AT) (AY)		(AA) (AB) (AC) (AD) (AE) (AF) (AG) (AH) (AI) (AJ) (AK) (AL) (AM) (AN) (AO) (AP) (AQ) (AR) (AS) (AT) (AU) (AV) (AW) (AX) (AY) (BA)	(AA) (AB) (AC) (AE) (AG) (AH) (AI) (AJ) (AK) (AL) (AM) (AN) (AP) (AQ) (AR) (AS) (AT) (AU) (AW) (AX) (AY)
Total 'Disapprove'	6457	327	484	470	117	266	151	259	436	192	235	201	269	183	200	131	116	448	115	197	392	159	113	240	335	493	71	117
	24.5	31.2	48	44.8	11.3	25.9	14.2	23.8	43.2	19.2	22.7	19.3	26.4	36.6	19.1	12.6	23.1	43.3	20.8	19.5	38.3	15.6	10.8	23.2	32.2	49	6.8	11.7
		(AD) (AE) (AF) (AG) (AI) (AJ) (AK) (AL) (AN) (AO) (AP) (AR) (AS) (AU) (AV) (AW) (AZ) (BA)	(AA) (AD) (AE) (AF) (AG) (AI) (AJ) (AK) (AL) (AM) (AN) (AO) (AP) (AR) (AS) (AT) (AU) (AV) (AW) (AX) (AZ) (BA)	(AA) (AD) (AE) (AF) (AG) (AI) (AJ) (AK) (AL) (AM) (AN) (AO) (AP) (AR) (AS) (AT) (AU) (AV) (AW) (AX) (AZ) (BA)	(AZ)	(AD) (AF) (AI) (AK) (AN) (AO) (AR) (AS) (AU) (AV) (AZ) (BA)	(AV) (AZ)	(AD) (AF) (AI) (AK) (AN) (AO) (AS) (AU) (AV) (AZ) (BA)	(AA) (AD) (AE) (AF) (AG) (AI) (AJ) (AK) (AL) (AM) (AN) (AO) (AP) (AR) (AS) (AT) (AU) (AV) (AW) (AX) (AZ) (BA)	(AD) (AF) (AO) (AU) (AV) (AZ) (BA)	(AD) (AF) (AO) (AU) (AV) (AZ) (BA)	(AD) (AF) (AO) (AU) (AV) (AZ) (BA)	(AD) (AF) (AI) (AK) (AN) (AO) (AR) (AS) (AU) (AV) (AZ) (BA)	(AA) (AD) (AE) (AF) (AG) (AI) (AJ) (AK) (AL) (AN) (AO) (AP) (AR) (AS) (AU) (AV) (AW) (AZ) (BA)	(AD) (AF) (AO) (AV) (AZ) (BA)	(AZ)	(AD) (AF) (AO) (AU) (AV) (AZ) (BA)	(AA) (AD) (AE) (AF) (AG) (AI) (AJ) (AK) (AL) (AM) (AN) (AO) (AP) (AR) (AS) (AT) (AU) (AV) (AW) (AX) (AZ) (BA)	(AD) (AF) (AO) (AU) (AV) (AZ) (BA)	(AD) (AF) (AO) (AU) (AV) (AZ) (BA)	(AA) (AD) (AE) (AF) (AG) (AI) (AJ) (AK) (AL) (AN) (AO) (AP) (AR) (AS) (AU) (AV) (AW) (AX) (AZ) (BA)	(AD) (AV) (AZ) (BA)	(AZ)	(AD) (AF) (AI) (AK) (AN) (AO) (AU) (AV) (AZ) (BA)	(AD) (AE) (AF) (AG) (AI) (AJ) (AK) (AL) (AN) (AO) (AP) (AR) (AS) (AU) (AV) (AW) (AZ) (BA)	(AA) (AD) (AE) (AF) (AG) (AH) (AI) (AJ) (AK) (AL) (AM) (AN) (AO) (AP) (AQ) (AR) (AS) (AT) (AU) (AV) (AW) (AX) (AZ) (BA)		(AZ)

[truncated: 37 more sheets: Q3_3, Q3_4, Q3_5, Q3_6, Q4, Q5_1, Q5_2, Q5_3, Q6_1, Q6_2, Q6_3, Q7_1, Q7_2, Q7_3, Q7_4, Q7_5, Q8_1, Q8_2, Q9, Q10_1 …]
