# Supplementary figures and images for: Considering justice as a planning principle helps navigate a diversity of future energy infrastructure designs
Source: Research Square preprint supplement (doi:10.21203/rs.3.rs-4256136/v1), 2024-12-18

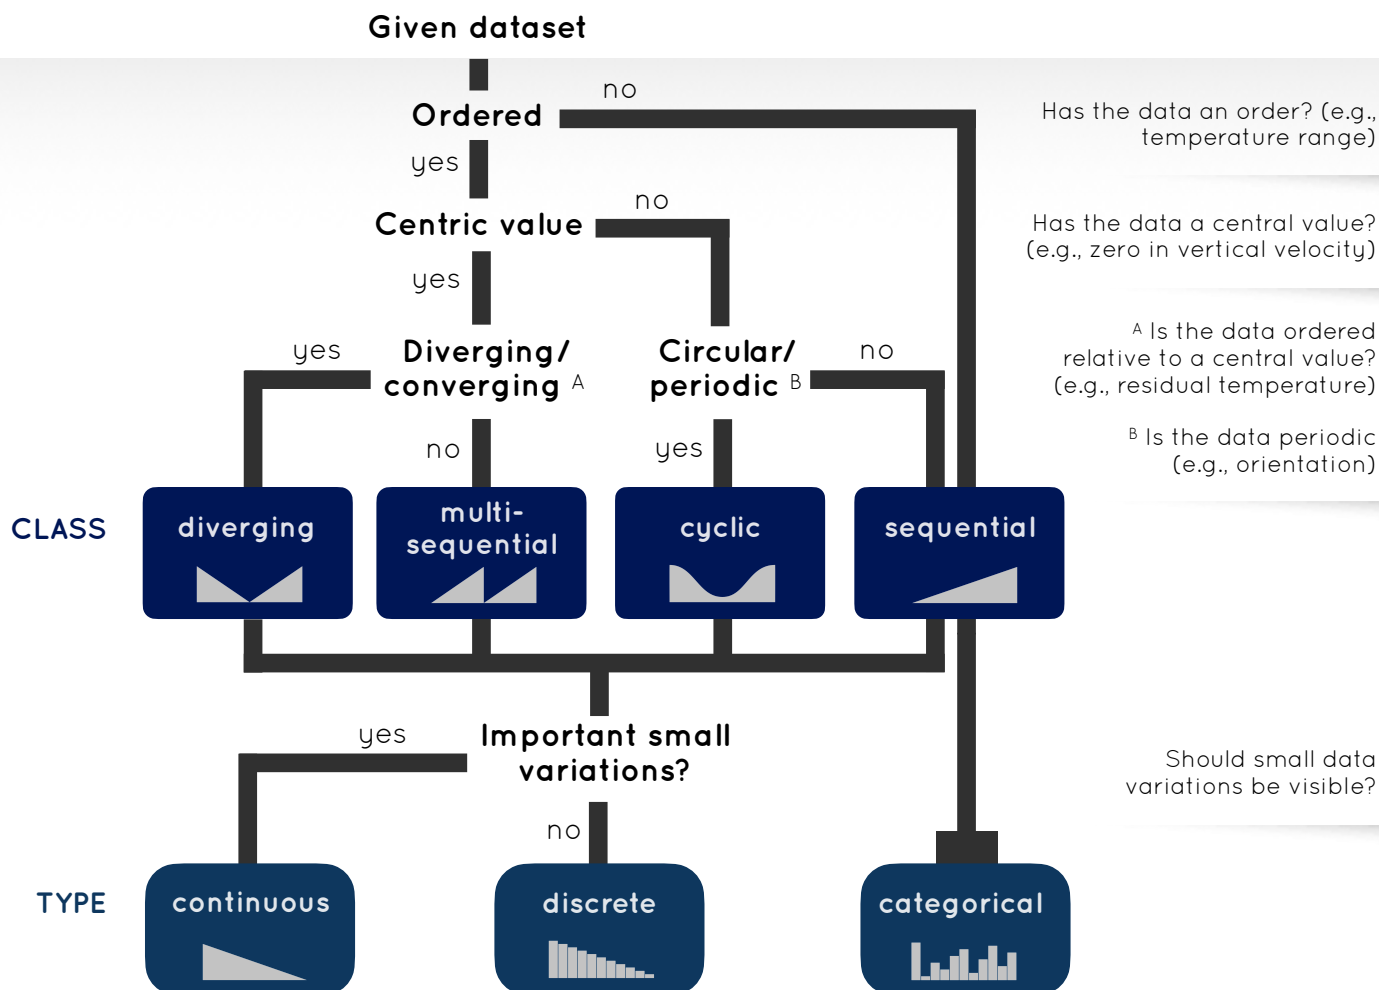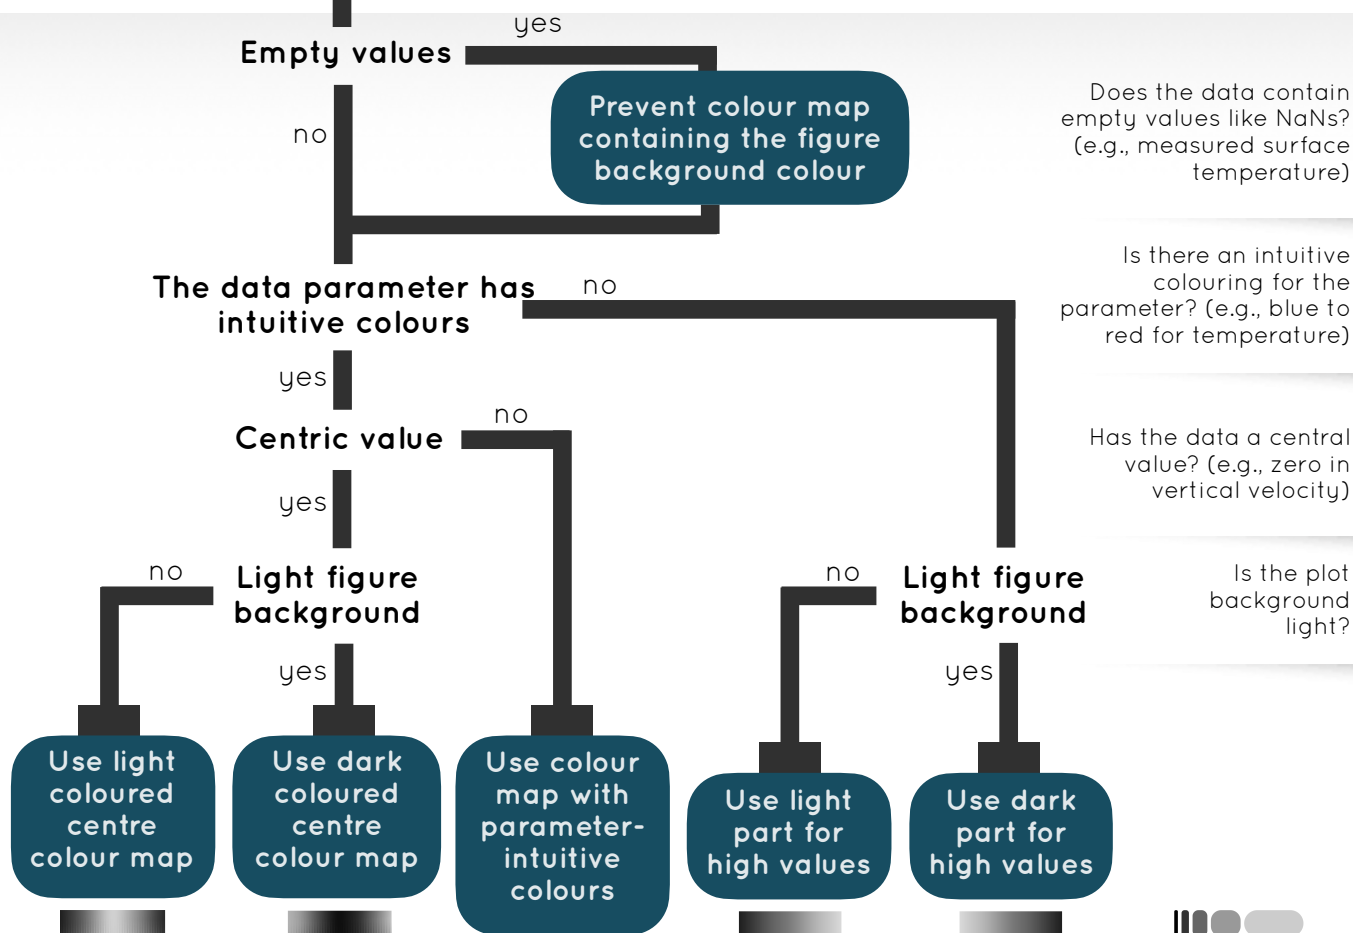

Supplement: Supplementary file 3 [file +ScientificColourMapsGuideline_Crameri_EtAl2020.pdf › code/data/ScientificColourMaps7/+ScientificColourMapsGuideline_Crameri_EtAl2020.pdf]
